# Supplementary material for: Quantum chemical insights into regioselective hydrolysis of C60F36
Source: Royal Society of Chemistry journal article supplement (doi:10.1039/c4ra10492g), 2014-11-13
Supplement: c4ra10492g1.pdf [file c4ra10492g1.pdf]

# Quantum chemical insights into regioselective hydrolysis of $C_{60}F_{36}$

Ruisheng Zhao<sup>a</sup> and Xiang Zhao<sup>a,\*</sup>

## $S_N2''$ mechanism

For  $S_N2''$  mechanism, no channels were located despite much effort has been made. No transition state via  $S_N2''$  mechanism was located but transition state via  $S_N2'$  mechanism was gotten during the search of  $S_N2''$  reaction channel, and we think that this is due to that  $\gamma$ -C atom is much more reactive than  $\delta$ -C atom (Scheme S1).

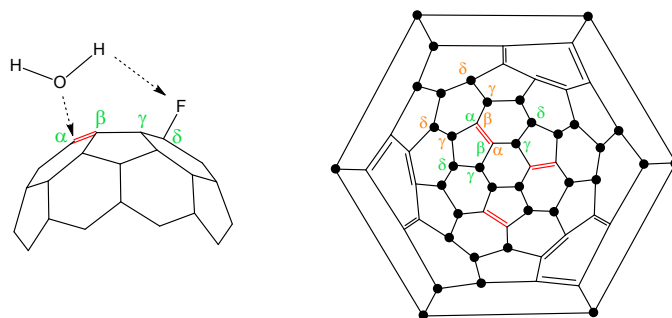

Scheme S1. Labeling scheme of  $C_7$  isomer for  $S_N2''$  mechanism. Only one isolated double bond was labeled for clarity.

## $S_N2'$ mechanism

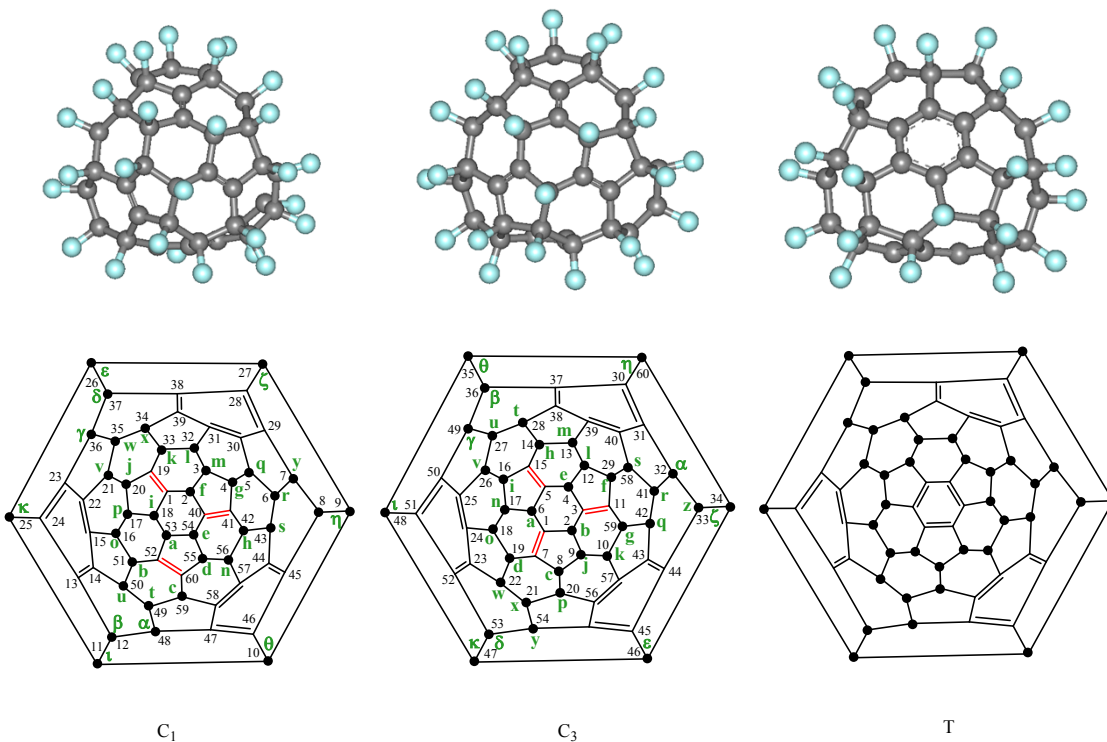

Fig S1.  $C_1$ ,  $C_3$  and  $T$  isomer of  $C_{60}F_{36}$

Table S1. Enthalpy and energy barriers (kcal/mol),  $H^\ddagger$  and  $E^\ddagger$ , and reaction enthalpies and energies,  $\Delta H$  and  $\Delta E$ , of hydrolysis reaction via  $S_N2'$  mechanism of  $C_I$  isomer in gas phase and in toluene.

|           |     | Solution-phase   |              |                |              |                                    |              | Gas-phase      |              |                |              |
|-----------|-----|------------------|--------------|----------------|--------------|------------------------------------|--------------|----------------|--------------|----------------|--------------|
|           |     | M06-PCM/6-31G(d) |              |                |              | M06-PCM/6-31+G(d)/M06-PCM/6-31G(d) |              | $H^\ddagger^b$ | $\Delta H^b$ | $E^\ddagger^d$ | $\Delta E^d$ |
|           |     | $H^\ddagger^a$   | $\Delta H^a$ | $E^\ddagger^c$ | $\Delta E^c$ | $E^\ddagger^e$                     | $\Delta E^e$ |                |              |                |              |
| $C_I$ -   | n=0 | 25.7             |              | 27.2           |              | 30.9                               |              |                |              |                |              |
| $S_N2'$ - | n=1 | 10.4             | -4.8         | 11.7           | -4.7         | 15.2                               | -8.9         | 28.1           | -1.4         | 29.8           | -1.3         |
| $C60-F_a$ | n=2 | 15.8             |              | 16.4           |              | 20.7                               |              |                |              |                |              |
| $C_I$ -   | n=0 | 28.4             |              | 29.8           |              | 32.7                               |              |                |              |                |              |
| $S_N2'$ - | n=1 | 12.3             | 7.4          | 13.5           | 7.7          | 16.7                               | 3.9          | 30.3           | 10.5         | 31.1           | 10.6         |
| $C60-F_b$ | n=2 | 16.1             |              | 17.3           |              | 21.4                               |              |                |              |                |              |
| $C_I$ -   | n=0 | 51.0             |              | 52.3           |              | 56.4                               |              |                |              |                |              |
| $S_N2'$ - | n=1 | 40.9             | 22.9         | 42.1           | 23.0         | 45.8                               | 20.3         | 51.3           | 24.5         | 53.5           | 24.7         |
| $C52-F_c$ | n=2 | 47.3             |              | 48.7           |              | 52.5                               |              |                |              |                |              |
| $C_I$ -   | n=0 | 44.1             |              | 45.4           |              | 48.8                               |              |                |              |                |              |
| $S_N2'$ - | n=1 | 35.6             | 19.2         | 36.9           | 19.1         | 40.1                               | 15.0         | 44.7           | 20.7         | 46.7           | 21.0         |
| $C52-F_d$ | n=2 | 43.6             |              | 45.1           |              | 48.9                               |              |                |              |                |              |
| $C_I$ -   | n=0 | 29.2             |              | 30.4           |              | 34.9                               |              |                |              |                |              |
| $S_N2'$ - | n=1 | 18.9             | 3.5          | 20.6           | 3.8          | 22.4                               | -0.1         | 31.7           | 7.1          | 33.7           | 7.3          |
| $C40-F_g$ | n=2 | 27.4             |              | 28.6           |              | 32.7                               |              |                |              |                |              |
| $C_I$ -   | n=0 | 32.5             |              | 31.3           |              | 38.0                               |              |                |              |                |              |
| $S_N2'$ - | n=1 | 19.5             | 11.4         | 21.1           | 11.7         | 25.3                               | 8.5          | 35.2           | 14.3         | 37.2           | 14.6         |
| $C40-F_h$ | n=2 | 27.9             |              | 29.0           |              | 32.2                               |              |                |              |                |              |
| $C_I$ -   | n=0 | 41.1             |              | 42.4           |              | 45.5                               |              |                |              |                |              |
| $S_N2'$ - | n=1 | 33.7             | 7.6          | 34.8           | 7.8          | 38.5                               | 3.1          | 42.6           | 10.1         | 44.5           | 10.2         |
| $C41-F_f$ | n=2 | 38.7             |              | 40.1           |              | 44.6                               |              |                |              |                |              |
| $C_I$ -   | n=0 | 40.7             |              | 41.7           |              | 45.9                               |              |                |              |                |              |
| $S_N2'$ - | n=1 | 30.6             | 21.9         | 31.9           | 22.1         | 34.6                               | 18.5         | 41.7           | 24.5         | 43.5           | 24.6         |
| $C41-F_e$ | n=2 | 34.8             |              | 36.4           |              | 39.5                               |              |                |              |                |              |
| $C_I$ -   | n=0 | 31.7             |              | 33.1           |              | 36.7                               |              |                |              |                |              |
| $S_N2'$ - | n=1 | 25.1             | 3.3          | 26.8           | 3.6          | 30.4                               | -0.4         | 37.2           | 6.8          | 39.1           | 7.1          |
| $C1-F_j$  | n=2 | 39.0             |              | 42.1           |              | 44.6                               |              |                |              |                |              |
| $C_I$ -   | n=0 | 33.7             |              | 34.9           |              | 39.4                               |              |                |              |                |              |
| $S_N2'$ - | n=1 | 27.4             | 14.8         | 28.7           | 15.1         | 31.9                               | 11.4         | 36.0           | 17.8         | 37.9           | 18.1         |
| $C1-F_k$  | n=2 | 35.2             |              | 36.8           |              | 40.3                               |              |                |              |                |              |
| $C_I$ -   | n=0 | 43.6             |              | 45.0           |              | 48.4                               |              |                |              |                |              |
| $S_N2'$ - | n=1 | 31.6             | 13.0         | 32.2           | 13.0         | 36.0                               | 8.5          | 43.6           | 15.4         | 45.4           | 15.5         |
| $C19-F_l$ | n=2 | 36.1             |              | 37.7           |              | 41.5                               |              |                |              |                |              |
| $C_I$ -   | n=0 | 38.3             |              | 39.5           |              | 42.6                               |              |                |              |                |              |
| $S_N2'$ - | n=1 | 29.5             | 5.8          | 31.3           | 5.7          | 33.2                               | 1.1          | 38.8           | 8.7          | 40.6           | 8.8          |
| $C19-F_i$ | n=2 | 34.9             |              | 36.4           |              | 40.4                               |              |                |              |                |              |

<sup>a</sup> These enthalpy values were obtained from frequency calculations at M06-PCM/6-31G(d) level, 25 °C and 1 atm in toluene on the geometries optimized at the same level.

<sup>b</sup> These enthalpy values were obtained from frequency calculations at B3LYP/6-31G(d) level, 25 °C and 1 atm in gas phase on the geometries optimized at the same level.

<sup>c</sup> These values including corrections for zero-point vibrational energies were obtained from optimization calculations at M06-PCM/6-31G(d) level in toluene, and the scale factor for zero-point energies is 0.980. Zero-point vibrational energies were obtained from frequency calculations at the same level, 25 °C and 1 atm.

<sup>d</sup> These values including corrections for zero-point vibrational energies were obtained from optimization calculations at B3LYP/6-31G(d) level in gas phase, and the scale factor for zero-point energies is 0.977. Zero-point vibrational energies were obtained from frequency calculations at the same level, 25 °C and 1 atm.

<sup>e</sup> These values were obtained from single-point calculations at M06-PCM/6-31+G(d) level in toluene on those geometries which were optimized at M06-PCM/6-31G(d) level in toluene.

## $S_N1$ and $S_N2$ mechanism

Table S2. Bond lengths (Å) and energies (kcal/mol) of 36 C-F bond of  $C_7$  isomer

|                    | bond length | bond energy |                    | bond length | bond energy |                    | bond length | bond energy |
|--------------------|-------------|-------------|--------------------|-------------|-------------|--------------------|-------------|-------------|
| C10-F <sub>θ</sub> | 1.38111     | 288.7       | C59-F <sub>c</sub> | 1.37835     | 296.7       | C54-F <sub>e</sub> | 1.37204     | 304.6       |
| C27-F <sub>ζ</sub> | 1.38085     | 289.6       | C32-F <sub>l</sub> | 1.37625     | 297.5       | C51-F <sub>b</sub> | 1.36928     | 305.5       |
| C25-F <sub>κ</sub> | 1.38098     | 289.6       | C20-F <sub>j</sub> | 1.37505     | 297.6       | C42-F <sub>h</sub> | 1.37007     | 306.1       |
| C2-F <sub>f</sub>  | 1.38313     | 292.1       | C4-F <sub>g</sub>  | 1.37553     | 297.9       | C33-F <sub>k</sub> | 1.36895     | 307.6       |
| C18-F <sub>i</sub> | 1.37801     | 293.0       | C8-F <sub>z</sub>  | 1.37234     | 298.9       | C17-F <sub>p</sub> | 1.35825     | 320.3       |
| C43-F <sub>s</sub> | 1.37751     | 294.4       | C56-F <sub>n</sub> | 1.37238     | 299.1       | C9-F <sub>η</sub>  | 1.35764     | 321.0       |
| C53-F <sub>a</sub> | 1.37779     | 294.6       | C12-F <sub>β</sub> | 1.37278     | 299.5       | C11-F <sub>l</sub> | 1.35734     | 321.0       |
| C16-F <sub>o</sub> | 1.37717     | 294.9       | C7-F <sub>γ</sub>  | 1.37264     | 299.9       | C26-F <sub>ε</sub> | 1.35663     | 321.7       |
| C5-F <sub>q</sub>  | 1.37670     | 295.4       | C48-F <sub>α</sub> | 1.37220     | 300.1       | C6-F <sub>r</sub>  | 1.35582     | 322.5       |
| C34-F <sub>x</sub> | 1.37689     | 295.5       | C36-F <sub>γ</sub> | 1.37163     | 300.8       | C35-F <sub>w</sub> | 1.35512     | 323.0       |
| C21-F <sub>v</sub> | 1.37626     | 295.7       | C37-F <sub>δ</sub> | 1.37146     | 300.9       | C3-F <sub>m</sub>  | 1.35914     | 324.2       |
| C50-F <sub>u</sub> | 1.37649     | 296.6       | C55-F <sub>d</sub> | 1.37135     | 303.4       | C49-F <sub>t</sub> | 1.35726     | 324.8       |

Four C-F bonds with long bond lengths and low bond energies, C10-F<sub>θ</sub>, C27-F<sub>ζ</sub>, C25-F<sub>κ</sub> and C2-F<sub>f</sub>, were sifted, and hydrolysis reaction via S<sub>N</sub>1 and S<sub>N</sub>2 mechanism was investigated on these four bonds.

Table S3. Energy barriers (kcal/mol) of hydrolysis reaction via S<sub>N</sub>1 and S<sub>N</sub>2 mechanism, E<sup>‡</sup>(S<sub>N</sub>1) and E<sup>‡</sup>(S<sub>N</sub>2)

|                                            | E <sup>‡</sup> (S <sub>N</sub> 1) <sup>a</sup> |                                            | E <sup>‡</sup> (S <sub>N</sub> 2) <sup>a</sup> |
|--------------------------------------------|------------------------------------------------|--------------------------------------------|------------------------------------------------|
| $C_7$ -S <sub>N</sub> 1-C10-F <sub>θ</sub> | 265.4                                          | $C_7$ -S <sub>N</sub> 2-C10-F <sub>θ</sub> | 101.5                                          |
| $C_7$ -S <sub>N</sub> 1-C27-F <sub>ζ</sub> | 262.9                                          | $C_7$ -S <sub>N</sub> 2-C27-F <sub>ζ</sub> | 109.7                                          |
| $C_7$ -S <sub>N</sub> 1-C25-F <sub>κ</sub> | 267.2                                          | $C_7$ -S <sub>N</sub> 2-C25-F <sub>κ</sub> | 119.1                                          |
| $C_7$ -S <sub>N</sub> 1-C2-F <sub>f</sub>  | 265.7                                          | $C_7$ -S <sub>N</sub> 2-C2-F <sub>f</sub>  | 99.5                                           |

<sup>a</sup> These values including corrections for zero-point vibrational energies were obtained from optimization calculations at B3LYP/6-31G(d) level in gas phase, and the scale factor for zero-point energies is 0.977. Zero-point vibrational energies were obtained from frequency calculations at the same level, 25 °C and 1 atm.

### $C_3$ isomer

Table S4. Enthalpy barriers (H<sup>‡</sup>) and (ΔH) of hydrolysis reaction at B3LYP/6-31G(d) level via S<sub>N</sub>2' mechanism of  $C_3$  isomer. All the enthalpies are given in kcal/mol

|                                            | H <sup>‡</sup> | ΔH   |
|--------------------------------------------|----------------|------|
| $C_3$ -S <sub>N</sub> 2'-C1-F <sub>c</sub> | 29.5           | 1.4  |
| $C_3$ -S <sub>N</sub> 2'-C1-F <sub>d</sub> | 32.0           | 11.3 |
| $C_3$ -S <sub>N</sub> 2'-C7-F <sub>b</sub> | 42.5           | 10.2 |
| $C_3$ -S <sub>N</sub> 2'-C7-F <sub>a</sub> | 44.6           | 14.7 |

### Regioselectivity

$\langle\Delta H\rangle$  and  $\langle H^{\ddagger}\rangle$  were calculated based on the following equation,

$$\langle H \rangle = \sum w_i H_i$$

where  $w_i$  and  $H_i$  are the weight coefficient enthalpy of isomer  $i$ , and was calculated by the following equation,

$$w_i = \{q_i \exp[-\Delta H_{0,i}^{\circ}/(RT)]\} / \sum q_i \exp[-\Delta H_{0,i}^{\circ}/(RT)],$$

where  $R$  is gas constant, and  $T$  is absolute temperature, and  $\Delta H_{0,i}^{\circ}$  is the enthalpy at the absolute zero temperature or ground-state energy (the relative potential energies corrected for the vibrational zero-point energy), and  $q_i$  is partition function.<sup>1-3</sup>

Table S5. Weight coefficients of transition state,  $w_i$ (TS), and product  $w_i$ (IP), reaction enthalpies (ΔH) and barriers (H<sup>‡</sup>), and mean enthalpy values,  $\langle\Delta H\rangle$  and  $\langle H^{\ddagger}\rangle$ , at M06/6-31G(d) and B3LYP/6-31G(d) level. All the enthalpies are given in kcal/mol.

|                                                      | M06                 |                |                   |                     |      |      | B3LYP               |                |                   |                     |      |      |
|------------------------------------------------------|---------------------|----------------|-------------------|---------------------|------|------|---------------------|----------------|-------------------|---------------------|------|------|
|                                                      | w <sub>i</sub> (TS) | H <sup>‡</sup> | <H <sup>‡</sup> > | w <sub>i</sub> (IP) | ΔH   | <ΔH> | w <sub>i</sub> (TS) | H <sup>‡</sup> | <H <sup>‡</sup> > | w <sub>i</sub> (IP) | ΔH   | <ΔH> |
| C <sub>J</sub> -S <sub>N</sub> 2'-C60-F <sub>a</sub> | 0.384               | 10.4           |                   | 0.572               | -4.8 |      | 0.266               | 28.1           |                   | 0.456               | -1.4 |      |
| C <sub>J</sub> -S <sub>N</sub> 2'-C60-F <sub>b</sub> | 0.616               | 12.3           | 11.6              | 0.428               | 7.4  | 0.4  | 0.734               | 30.3           | 29.7              | 0.544               | 10.5 | 5.1  |
| C <sub>J</sub> -S <sub>N</sub> 2'-C52-F <sub>c</sub> | 0.326               | 40.9           | 38.1              | 0.478               | 22.9 | 21.0 | 0.526               | 51.3           | 48.2              | 0.598               | 24.5 | 23.0 |
| C <sub>J</sub> -S <sub>N</sub> 2'-C52-F <sub>d</sub> | 0.647               | 35.6           |                   | 0.521               | 19.2 |      | 0.474               | 44.7           |                   | 0.402               | 20.7 |      |
| C <sub>J</sub> -S <sub>N</sub> 2'-C40-F <sub>e</sub> | 0.708               | 18.9           | 19.1              | 0.331               | 3.5  | 8.8  | 0.395               | 31.7           | 33.8              | 0.441               | 7.1  | 11.1 |
| C <sub>J</sub> -S <sub>N</sub> 2'-C40-F <sub>f</sub> | 0.292               | 19.5           |                   | 0.669               | 11.4 |      | 0.605               | 35.2           |                   | 0.559               | 14.3 |      |
| C <sub>J</sub> -S <sub>N</sub> 2'-C41-F <sub>g</sub> | 0.196               | 33.7           | 31.2              | 0.111               | 7.6  | 20.3 | 0.803               | 42.6           | 42.4              | 0.369               | 10.1 | 19.2 |
| C <sub>J</sub> -S <sub>N</sub> 2'-C41-F <sub>e</sub> | 0.804               | 30.6           |                   | 0.889               | 21.9 |      | 0.197               | 41.7           |                   | 0.631               | 24.5 |      |
| C <sub>J</sub> -S <sub>N</sub> 2'-C1-F <sub>j</sub>  | 0.179               | 25.1           | 27.0              | 0.278               | 3.3  | 11.6 | 0.286               | 37.2           | 36.3              | 0.379               | 6.8  | 13.6 |
| C <sub>J</sub> -S <sub>N</sub> 2'-C1-F <sub>k</sub>  | 0.821               | 27.4           |                   | 0.722               | 14.8 |      | 0.714               | 36.0           |                   | 0.621               | 17.8 |      |
| C <sub>J</sub> -S <sub>N</sub> 2'-C19-F <sub>f</sub> | 0.403               | 31.6           | 30.3              | 0.502               | 13.0 | 9.4  | 0.610               | 43.6           | 41.7              | 0.636               | 15.4 | 13.0 |
| C <sub>J</sub> -S <sub>N</sub> 2'-C19-F <sub>i</sub> | 0.597               | 29.5           |                   | 0.498               | 5.8  |      | 0.390               | 38.8           |                   | 0.364               | 8.7  |      |

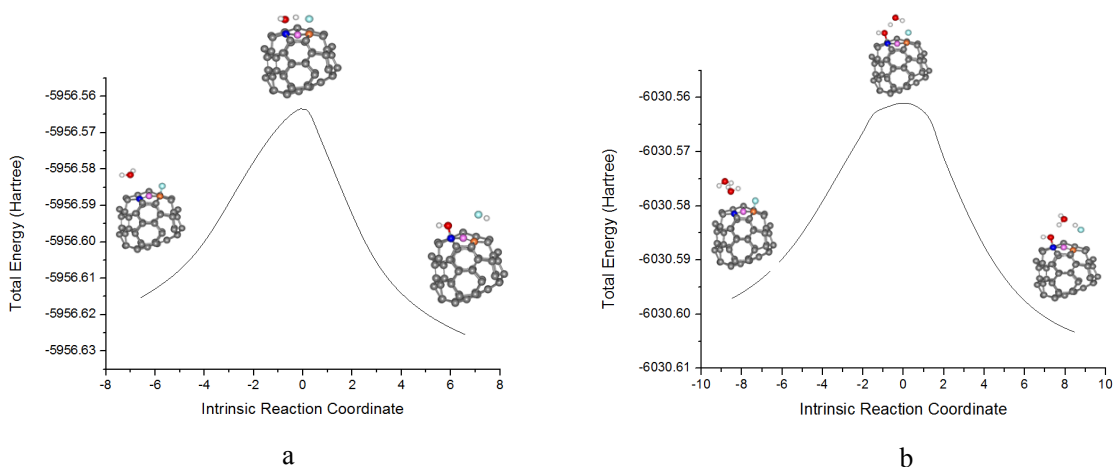

Fig S2. Reaction paths of hydrolysis of C<sub>J</sub> isomer via C<sub>J</sub>-S<sub>N</sub>2'-C60-F<sub>a</sub> channel in gas phase (a) and in toluene (b)

## References

- 1 S. Miertus, E. Scorocco and J. Tomasi, *Chem. Phys.*, 1981, **55**, 117.
- 2 Z. Slanina, *Int. J. Quantum Chem.*, 1979, **16**, 79
- 3 Z. Slannina, *Int. Rev. Phys. Chem.*, 1987, **6**, 251

## Coordinates of structures

B3LYP/6-31G(d) method

$C_1$  isomer

|   |             |             |             |
|---|-------------|-------------|-------------|
| C | -3.02359100 | -0.43928900 | -1.02777500 |
| C | -3.28291600 | 1.01838000  | -1.19159200 |
| C | -2.54908400 | 1.73781800  | -2.38430900 |
| C | -1.76112600 | 2.97051700  | -1.64812000 |
| C | -0.28061500 | 3.24822300  | -2.03792300 |
| C | 0.72661800  | 3.88421700  | -0.94575500 |
| C | 2.15008900  | 3.07704900  | -1.21148200 |
| C | 3.03970600  | 2.58618200  | -0.02234500 |
| C | 3.96550700  | 1.21598600  | -0.16502100 |
| C | 3.77222800  | 0.48413800  | 1.25055300  |
| C | 3.76016200  | -1.08920600 | 1.36275700  |
| C | 2.64147800  | -1.69483200 | 2.42023000  |
| C | 1.63476500  | -2.27076000 | 1.49252200  |
| C | 0.31755600  | -2.54178200 | 1.79793200  |
| C | -0.55345800 | -2.93608800 | 0.79984100  |
| C | -1.96526500 | -3.01484500 | 1.25620000  |
| C | -2.96821200 | -2.61368700 | 0.09211700  |
| C | -3.59936200 | -1.14777100 | 0.17015600  |
| C | -2.37532600 | -1.23797400 | -1.86888400 |
| C | -2.35833300 | -2.67659300 | -1.43491300 |
| C | -0.96010600 | -3.32868700 | -1.67090000 |
| C | -0.10220000 | -3.08006300 | -0.48988300 |
| C | 1.21711600  | -2.81689500 | -0.79806600 |
| C | 2.07653300  | -2.38008400 | 0.18917500  |
| C | 3.47462100  | -1.90711700 | 0.00906700  |
| C | 3.67654200  | -1.25547900 | -1.40800500 |
| C | 3.67725100  | 0.34987300  | -1.45223500 |
| C | 2.34558600  | 0.66779800  | -2.02921400 |
| C | 1.67822300  | 1.87083900  | -1.93727900 |
| C | 0.37649800  | 1.96638400  | -2.38256600 |
| C | -0.24697800 | 0.87362400  | -2.93830200 |
| C | -1.68655000 | 0.76694200  | -3.28926700 |
| C | -1.88818300 | -0.81421000 | -3.21703400 |
| C | -0.45384100 | -1.42757200 | -3.52915500 |
| C | -0.03324400 | -2.81067700 | -2.89124700 |
| C | 1.50471200  | -2.83622000 | -2.25443600 |
| C | 2.52373600  | -1.67688800 | -2.52996800 |
| C | 1.73535900  | -0.42109100 | -2.62158200 |
| C | 0.43240100  | -0.32378900 | -3.06338300 |
| C | -2.77775200 | 1.66888300  | 0.05965300  |
| C | -1.91368800 | 2.65435800  | -0.18201500 |

|   |             |             |             |
|---|-------------|-------------|-------------|
| C | -1.30672800 | 3.53500200  | 0.85978700  |
| C | 0.22001400  | 3.86100400  | 0.55250200  |
| C | 0.90881300  | 2.81365500  | 1.36381600  |
| C | 2.13383500  | 2.22665100  | 1.10158200  |
| C | 2.51934200  | 1.08835400  | 1.78489000  |
| C | 1.71092200  | 0.56806700  | 2.77824900  |
| C | 1.88073600  | -0.76545900 | 3.42140500  |
| C | 0.32515900  | -1.12325900 | 3.88196300  |
| C | -0.37607700 | -2.29821400 | 3.09121500  |
| C | -1.88749700 | -2.15854700 | 2.59344000  |
| C | -2.24328700 | -0.73373500 | 2.32719800  |
| C | -3.44692600 | -0.35810900 | 1.51196100  |
| C | -3.30374500 | 1.21890700  | 1.39108300  |
| C | -2.35119800 | 1.63997400  | 2.56698900  |
| C | -1.31389600 | 2.82177800  | 2.27795500  |
| C | 0.08449400  | 2.28286900  | 2.34095900  |
| C | 0.49665700  | 1.16796500  | 3.05266800  |
| C | -0.44438700 | 0.27069800  | 3.78563700  |
| C | -1.67406300 | 0.31317800  | 2.92327900  |
| F | -4.64816300 | 1.20770700  | -1.30697800 |
| F | -3.50048700 | 2.28819200  | -3.18380100 |
| F | -2.47015800 | 4.12106600  | -1.90424200 |
| F | -0.28688800 | 4.08433200  | -3.13162700 |
| F | 0.92429700  | 5.18277400  | -1.28177900 |
| F | 2.91327800  | 3.87659700  | -2.02535700 |
| F | 3.88783900  | 3.60346700  | 0.33699600  |
| F | 5.26377000  | 1.60623700  | -0.23843900 |
| F | 4.81298600  | 0.91384900  | 2.05033300  |
| F | 4.98844600  | -1.46257900 | 1.80352000  |
| F | 3.26799100  | -2.68203600 | 3.13956300  |
| F | -2.26079400 | -4.31207000 | 1.61183700  |
| F | -3.99680200 | -3.49899600 | 0.14758000  |
| F | -4.95286600 | -1.27167400 | -0.05699700 |
| F | -3.26195300 | -3.37035500 | -2.20493600 |
| F | -1.15137200 | -4.68063600 | -1.84338500 |
| F | 4.30348400  | -3.01111600 | 0.04476300  |
| F | 4.88001400  | -1.67386000 | -1.87388700 |
| F | 4.63761300  | 0.70921600  | -2.37707000 |
| F | -1.88153900 | 1.14695300  | -4.59756500 |
| F | -2.78532300 | -1.23103700 | -4.16329600 |
| F | -0.34740200 | -1.56059200 | -4.89546600 |
| F | -0.08689300 | -3.74314300 | -3.87307000 |
| F | 2.07299600  | -4.02342600 | -2.64037800 |
| F | 3.18654700  | -1.94158800 | -3.70108500 |

|                       |             |             |             |
|-----------------------|-------------|-------------|-------------|
| F                     | -2.02124600 | 4.70291500  | 0.91026600  |
| F                     | 0.48613900  | 5.10075300  | 1.09076000  |
| F                     | 2.62062600  | -0.66546300 | 4.57270500  |
| F                     | 0.36351700  | -1.48063000 | 5.19077100  |
| F                     | -0.30456000 | -3.42298300 | 3.88147300  |
| F                     | -2.74992700 | -2.66886600 | 3.52656000  |
| F                     | -4.56626400 | -0.63085400 | 2.26761300  |
| F                     | -4.53597800 | 1.79797500  | 1.56069700  |
| F                     | -3.13026400 | 2.02919000  | 3.62631200  |
| F                     | -1.51026400 | 3.79135300  | 3.22916700  |
| F                     | -0.74641500 | 0.72240200  | 5.05236100  |
| C <sub>3</sub> isomer |             |             |             |
| C                     | -2.98903400 | -0.50397700 | -1.30901300 |
| C                     | -3.38411400 | -1.47618000 | -0.22588900 |
| C                     | -2.98953000 | -0.88030500 | 1.09118700  |
| C                     | -3.38375200 | 0.54387600  | 1.39161300  |
| C                     | -2.98839600 | 1.38624100  | 0.21715200  |
| C                     | -3.38333000 | 0.93459400  | -1.16636300 |
| C                     | -2.23417300 | -1.05073600 | -2.25713900 |
| C                     | -2.05452200 | -2.53884100 | -2.09623800 |
| C                     | -2.68678200 | -2.83790700 | -0.60941900 |
| C                     | -1.69856800 | -3.39245700 | 0.50014200  |
| C                     | -2.23377000 | -1.42784400 | 2.03812300  |
| C                     | -2.68628000 | 0.89239000  | 2.76280200  |
| C                     | -1.69747600 | 2.12997600  | 2.68809400  |
| C                     | -1.73918100 | 3.15147100  | 1.45803600  |
| C                     | -2.23272200 | 2.48012700  | 0.21780200  |
| C                     | -2.05277100 | 3.08508800  | -1.15115700 |
| C                     | -2.68544800 | 1.94758200  | -2.15373400 |
| C                     | -1.69713800 | 1.26365400  | -3.18827700 |
| C                     | -1.73975000 | -0.31232100 | -3.45830500 |
| C                     | -0.59042100 | -2.98879000 | -2.38403300 |
| C                     | 0.30775900  | -2.14981300 | -3.42961900 |
| C                     | -0.23543000 | -0.71235700 | -3.80048600 |
| C                     | 0.51365200  | 0.35005600  | -3.07328200 |
| C                     | -0.28871400 | 1.42644800  | -2.74440200 |
| C                     | 0.20457100  | 2.43897000  | -1.95475800 |
| C                     | -0.58877800 | 3.55925800  | -1.39650200 |
| C                     | 0.30900000  | 4.04495500  | -0.14683500 |
| C                     | -0.23483700 | 3.64765900  | 1.28332200  |
| C                     | -2.05422600 | -0.54508200 | 3.24675600  |
| C                     | 2.28695500  | 0.89180800  | 2.00321200  |
| C                     | 1.49717800  | 0.08984000  | 2.80142500  |
| C                     | 1.82176500  | -1.29216600 | 3.23913500  |

|   |             |             |             |
|---|-------------|-------------|-------------|
| C | 2.71838900  | -1.92362100 | 2.12250200  |
| C | 3.79273200  | -0.99782900 | 1.25647000  |
| C | 3.79323200  | 1.58514300  | 0.23539300  |
| C | 2.71962100  | 2.79864200  | 0.60432400  |
| C | 1.80723900  | 2.10529700  | 1.54991400  |
| C | 0.51387400  | 2.48661600  | 1.84038000  |
| C | -0.28914400 | 1.66379000  | 2.60773800  |
| C | 0.20334900  | 0.47306800  | 3.08901600  |
| C | 0.30749000  | -1.89556900 | 3.57637300  |
| C | -0.23651100 | -2.93525500 | 2.51696600  |
| C | 0.51278700  | -2.83753600 | 1.23330700  |
| C | 1.80637100  | -2.39556400 | 1.04883700  |
| C | 2.28685700  | -2.18193200 | -0.22857400 |
| C | 3.62933200  | -1.54208000 | -0.24583500 |
| C | 3.79301900  | -0.59014400 | -1.49103100 |
| C | 3.62957500  | 0.98285500  | -1.21136200 |
| C | 1.82341900  | 3.45067600  | -0.50083600 |
| C | 1.49859600  | 2.38114400  | -1.47936200 |
| C | 2.28741600  | 1.28803600  | -1.77431500 |
| C | 1.80709800  | 0.28868800  | -2.59816600 |
| C | 2.71909100  | -0.87732700 | -2.72611300 |
| C | 1.82211900  | -2.15976300 | -2.73799900 |
| C | 1.49717000  | -2.47197100 | -1.32243800 |
| C | 0.20310100  | -2.91235000 | -1.13485700 |
| C | -0.28978800 | -3.09095000 | 0.13684100  |
| C | -0.59031000 | -0.57004300 | 3.78016400  |
| C | -1.74060600 | -2.83758400 | 1.99961800  |
| C | 3.62931000  | 0.55636900  | 1.45793800  |
| F | -4.75552100 | -1.65086300 | -0.22215000 |
| F | -4.75509600 | 0.63516200  | 1.54092400  |
| F | -4.75468200 | 1.01913000  | -1.31981500 |
| F | -2.54699700 | 4.21852500  | 1.74375500  |
| F | -1.88165500 | 2.86638500  | 3.83616500  |
| F | -3.66199900 | 1.21804100  | 3.65101200  |
| F | -2.85867500 | -1.02974400 | 4.25106300  |
| F | -2.54904700 | -3.61791500 | 2.78092600  |
| F | -1.88383200 | -4.75475100 | 0.56397600  |
| F | -3.66259800 | -3.76972700 | -0.77164800 |
| F | -2.85886900 | -3.16681500 | -3.01784900 |
| F | -2.54715700 | -0.59763300 | -4.52574500 |
| F | -1.88103800 | 1.89032300  | -4.39978600 |
| F | -3.66090800 | 2.55449100  | -2.87975900 |
| F | -2.85694400 | 4.19736000  | -1.23375000 |
| F | -0.06327000 | 4.74240600  | 2.10057700  |



|   |             |             |             |
|---|-------------|-------------|-------------|
| F | 0.37857200  | 5.39791400  | -0.19157200 |
| F | -0.63404900 | 4.59678500  | -2.30071900 |
| F | -0.06401900 | -0.55174600 | -5.15726400 |
| F | 0.37666300  | -2.86490000 | -4.57907600 |
| F | -0.63573900 | -4.29055300 | -2.83051600 |
| F | -0.06630200 | -4.19051700 | 3.05649600  |
| F | 0.37607400  | -2.53353900 | 4.77041500  |
| F | -0.63539900 | -0.30560500 | 5.13075200  |
| F | 3.43588900  | 3.78597900  | 1.23134700  |
| F | 2.52239400  | 4.47407100  | -1.08854000 |
| F | 3.43475300  | -0.82827100 | -3.89515300 |
| F | 2.52011300  | -3.18159800 | -3.32976900 |
| F | 3.43390000  | -2.96042500 | 2.66467700  |
| F | 2.52026900  | -1.29408000 | 4.41966500  |
| F | 5.04452900  | 2.10465700  | 0.31056300  |
| F | 4.57246500  | 0.92203000  | 2.39768700  |
| F | 5.04395700  | -1.32264000 | 1.66931400  |
| F | 4.57258400  | -2.53860700 | -0.39920700 |
| F | 5.04439200  | -0.78487600 | -1.97833400 |
| F | 4.57286700  | 1.61419800  | -1.99749100 |

C<sub>1</sub>-S<sub>N</sub>2'-C60-F<sub>a</sub>

RC

|   |             |             |             |
|---|-------------|-------------|-------------|
| C | -2.65426000 | -1.52715400 | 0.97793600  |
| C | -2.76580200 | -2.35211500 | -0.25677700 |
| C | -1.71910900 | -3.51585000 | -0.42627200 |
| C | -1.04825300 | -3.20344700 | -1.88658500 |
| C | 0.49859700  | -3.29581000 | -2.03151100 |
| C | 1.25393200  | -2.36614400 | -3.11526300 |
| C | 2.64224300  | -1.90359300 | -2.33231400 |
| C | 3.18347200  | -0.43960800 | -2.43396300 |
| C | 4.01926000  | 0.24844100  | -1.17411500 |
| C | 3.43933100  | 1.74372500  | -1.11081100 |
| C | 3.29002300  | 2.50862700  | 0.26121800  |
| C | 1.91041300  | 3.41298900  | 0.40206800  |
| C | 1.11723700  | 2.60411300  | 1.36263300  |
| C | -0.25229200 | 2.65894200  | 1.52749600  |
| C | -0.87623900 | 1.73288200  | 2.34246700  |
| C | -2.35579400 | 1.80834600  | 2.28157900  |
| C | -3.02089200 | 0.38115300  | 2.45934000  |
| C | -3.54956200 | -0.32525300 | 1.12888700  |
| C | -1.88077400 | -1.76267200 | 2.03258800  |
| C | -2.06895800 | -0.76984800 | 3.14431400  |
| C | -0.70383400 | -0.35113300 | 3.77358400  |
| C | -0.13941800 | 0.78335900  | 3.00712700  |
| C | 1.22989300  | 0.73214400  | 2.85013400  |

|   |             |             |             |
|---|-------------|-------------|-------------|
| C | 1.85179400  | 1.62216300  | 1.99884300  |
| C | 3.28130200  | 1.60708400  | 1.59017500  |
| C | 3.86290500  | 0.14523900  | 1.59987500  |
| C | 3.98821200  | -0.57586800 | 0.17075100  |
| C | 2.86032600  | -1.54373800 | 0.18491800  |
| C | 2.27650500  | -2.14057200 | -0.91273600 |
| C | 1.12954500  | -2.88995400 | -0.75427000 |
| C | 0.58379500  | -3.06447200 | 0.49616200  |
| C | -0.73327600 | -3.67999400 | 0.80217300  |
| C | -1.05559900 | -2.99610200 | 2.20733500  |
| C | 0.36573100  | -2.65272400 | 2.83545000  |
| C | 0.52222400  | -1.40443800 | 3.79163700  |
| C | 1.85736200  | -0.45800400 | 3.47855500  |
| C | 2.98891900  | -0.93927900 | 2.50802800  |
| C | 2.33567100  | -1.74769100 | 1.44674900  |
| C | 1.18836700  | -2.49735600 | 1.60257300  |
| C | -2.53396500 | -1.41299500 | -1.40080800 |
| C | -1.57217000 | -1.83049200 | -2.22346900 |
| C | -1.17537200 | -1.14611100 | -3.48885600 |
| C | 0.40078300  | -1.17586000 | -3.71306700 |
| C | 0.79968800  | 0.14166500  | -3.13641200 |
| C | 2.00944500  | 0.46593900  | -2.54884700 |
| C | 2.13884100  | 1.63846600  | -1.82819500 |
| C | 1.07856500  | 2.52034800  | -1.74315200 |
| C | 0.99711400  | 3.69503800  | -0.83297200 |
| C | -0.64815400 | 3.87118400  | -0.64770300 |
| C | -1.22590000 | 3.50832300  | 0.78115900  |
| C | -2.55817300 | 2.63489700  | 0.93962300  |
| C | -2.74363400 | 1.72393400  | -0.22821300 |
| C | -3.67653100 | 0.54839700  | -0.16503700 |
| C | -3.39661300 | -0.19148000 | -1.54138400 |
| C | -2.73532400 | 0.89249200  | -2.46804100 |
| C | -1.57182100 | 0.39071100  | -3.44543000 |
| C | -0.27183200 | 1.01070600  | -3.03269800 |
| C | -0.12231000 | 2.20040300  | -2.34275700 |
| C | -1.27045500 | 3.00630400  | -1.83428100 |
| C | -2.27086500 | 1.94779900  | -1.45506400 |
| F | -4.04707900 | -2.86925800 | -0.32003600 |
| F | -2.41022100 | -4.68083900 | -0.54097900 |
| F | -1.59211100 | -4.09112700 | -2.78599700 |
| F | 0.81319500  | -4.60540600 | -2.31717100 |
| F | 1.61558700  | -3.16068100 | -4.15279600 |
| F | 3.63125200  | -2.76451700 | -2.73877500 |
| F | 3.98862000  | -0.34750000 | -3.54140200 |

|    |                                                          |             |             |
|----|----------------------------------------------------------|-------------|-------------|
| F  | 5.32103200                                               | 0.33955000  | -1.54868400 |
| F  | 4.28139200                                               | 2.51682400  | -1.88641300 |
| F  | 4.34786500                                               | 3.35402000  | 0.35841300  |
| F  | 2.27677600                                               | 4.61571200  | 0.95432300  |
| F  | -2.80874800                                              | 2.59268700  | 3.32114100  |
| F  | -4.09185600                                              | 0.55368200  | 3.27776400  |
| F  | -4.81191100                                              | -0.80917300 | 1.39806600  |
| F  | -2.80496800                                              | -1.36960900 | 4.13942200  |
| F  | -0.94029800                                              | 0.02846200  | 5.07559900  |
| F  | 3.99867100                                               | 2.31111700  | 2.53744100  |
| F  | 5.11100800                                               | 0.21536000  | 2.12817600  |
| F  | 5.16618800                                               | -1.29549900 | 0.20530600  |
| F  | -0.58103700                                              | -5.02924900 | 1.02716400  |
| F  | -1.72492500                                              | -3.86566100 | 3.02595800  |
| F  | 0.78791500                                               | -3.75976500 | 3.53726900  |
| F  | 0.64126700                                               | -1.87530600 | 5.05702300  |
| F  | 2.41825400                                               | -0.15063200 | 4.69196100  |
| F  | 3.89521000                                               | -1.68211300 | 3.22049200  |
| F  | -1.79697200                                              | -1.77150800 | -4.53755900 |
| F  | 0.61833100                                               | -1.16341500 | -5.07312900 |
| F  | 1.44805800                                               | 4.83128600  | -1.45848100 |
| F  | -0.92234100                                              | 5.18206400  | -0.88506600 |
| F  | -1.42993600                                              | 4.69577800  | 1.45089800  |
| F  | -3.66294000                                              | 3.42969600  | 1.09857300  |
| F  | -4.96560000                                              | 1.03224000  | -0.19245100 |
| F  | -4.58883300                                              | -0.60000500 | -2.08467500 |
| F  | -3.71757400                                              | 1.43710200  | -3.25174700 |
| F  | -1.90776300                                              | 0.76842200  | -4.72187200 |
| F  | -1.76826800                                              | 3.83559800  | -2.81659700 |
| H  | -3.92032100                                              | 5.22884200  | -0.35028900 |
| O  | -3.74442800                                              | 4.81346400  | -1.20695200 |
| H  | -3.23528500                                              | 5.47204500  | -1.70077800 |
| TS | imaginary vibrational frequency -641.08 cm <sup>-1</sup> |             |             |
| C  | -2.72033100                                              | -0.98871300 | 1.43287300  |
| C  | -2.98394400                                              | -2.03236800 | 0.39762800  |
| C  | -2.05890100                                              | -3.30927700 | 0.41806500  |
| C  | -1.47406300                                              | -3.37970600 | -1.11367000 |
| C  | 0.04575700                                               | -3.65043300 | -1.32158600 |
| C  | 0.79328400                                               | -3.03617000 | -2.61468200 |
| C  | 2.27587000                                               | -2.57085800 | -2.02460900 |
| C  | 2.92998900                                               | -1.21470600 | -2.44977800 |
| C  | 3.92100500                                               | -0.37907600 | -1.41238200 |
| C  | 3.47671700                                               | 1.14944200  | -1.62013500 |
| C  | 3.52017300                                               | 2.18475000  | -0.43402300 |

|   |             |             |             |
|---|-------------|-------------|-------------|
| C | 2.24646800  | 3.24671300  | -0.40037900 |
| C | 1.47896000  | 2.74872300  | 0.76975200  |
| C | 0.14296300  | 2.98276200  | 1.00230300  |
| C | -0.50686600 | 2.31068000  | 2.02443400  |
| C | -1.98089900 | 2.49980000  | 1.98645000  |
| C | -2.76041300 | 1.21723400  | 2.49030800  |
| C | -3.45087600 | 0.33963600  | 1.34873000  |
| C | -1.88209600 | -1.08360200 | 2.46047000  |
| C | -1.87865200 | 0.13055800  | 3.34526300  |
| C | -0.43552400 | 0.51807600  | 3.80812600  |
| C | 0.18200700  | 1.42795500  | 2.81569800  |
| C | 1.52604000  | 1.19715700  | 2.59258200  |
| C | 2.16547600  | 1.83411500  | 1.54838700  |
| C | 3.54331900  | 1.57308400  | 1.05376000  |
| C | 3.97682100  | 0.08316100  | 1.32693200  |
| C | 3.92166800  | -0.91485900 | 0.07023500  |
| C | 2.71422400  | -1.73688500 | 0.34618200  |
| C | 1.99950200  | -2.48233900 | -0.56827300 |
| C | 0.80438700  | -3.06115900 | -0.19412500 |
| C | 0.33853900  | -2.91790700 | 1.09205800  |
| C | -1.00099200 | -3.31944800 | 1.59412500  |
| C | -1.15596500 | -2.33477700 | 2.83987200  |
| C | 0.33584500  | -2.02207500 | 3.30163300  |
| C | 0.68288400  | -0.63538300 | 3.97191200  |
| C | 2.07719000  | 0.08167900  | 3.40281700  |
| C | 3.07559100  | -0.69921400 | 2.48385200  |
| C | 2.26827000  | -1.62468300 | 1.64877500  |
| C | 1.07249400  | -2.20279400 | 2.01957100  |
| C | -2.74670100 | -1.38600400 | -0.93475000 |
| C | -1.90160900 | -2.06299000 | -1.70666000 |
| C | -1.54178900 | -1.67881100 | -3.10239400 |
| C | 0.00702000  | -1.90313500 | -3.38713500 |
| C | 0.55149100  | -0.55030400 | -3.07804500 |
| C | 1.82734000  | -0.23957800 | -2.65516200 |
| C | 2.10977600  | 1.03276600  | -2.19824100 |
| C | 1.13754300  | 2.01359800  | -2.22691500 |
| C | 1.25261400  | 3.35942800  | -1.60996900 |
| C | -0.34192600 | 3.75361800  | -1.37420600 |
| C | -0.81498600 | 3.72233200  | 0.13267800  |
| C | -2.14940400 | 2.96811900  | 0.49546400  |
| C | -2.34533300 | 1.79348700  | -0.39397600 |
| C | -3.35376400 | 0.87679600  | -0.07984800 |
| C | -3.47148900 | -0.11620300 | -1.25500600 |
| C | -2.86712600 | 0.65753000  | -2.48962500 |

|   |             |             |             |
|---|-------------|-------------|-------------|
| C | -1.78465400 | -0.12505500 | -3.34264700 |
| C | -0.42997600 | 0.42349800  | -3.07304100 |
| C | -0.13804300 | 1.70537200  | -2.65908100 |
| C | -1.14651900 | 2.76493600  | -2.36732300 |
| C | -2.38777200 | 2.03710500  | -1.82612500 |
| F | -4.30690000 | -2.42365900 | 0.50266100  |
| F | -2.85849000 | -4.39494400 | 0.59081000  |
| F | -2.15563700 | -4.37975400 | -1.76838800 |
| F | 0.22660500  | -5.01511400 | -1.35034900 |
| F | 0.99950700  | -4.05096900 | -3.49013700 |
| F | 3.15116500  | -3.58882100 | -2.30810100 |
| F | 3.64030400  | -1.41257500 | -3.60717100 |
| F | 5.19190500  | -0.49442000 | -1.87537200 |
| F | 4.30206800  | 1.65863900  | -2.60414200 |
| F | 4.65770600  | 2.91051500  | -0.58677900 |
| F | 2.77331800  | 4.49091600  | -0.15933800 |
| F | -2.33329300 | 3.54194500  | 2.81688000  |
| F | -3.75159000 | 1.65479700  | 3.31099200  |
| F | -4.76657200 | 0.13232300  | 1.68245100  |
| F | -2.59196500 | -0.17165200 | 4.48346900  |
| F | -0.54862600 | 1.15576400  | 5.02371500  |
| F | 4.41507900  | 2.36275800  | 1.77782600  |
| F | 5.26326600  | 0.11452100  | 1.75860400  |
| F | 5.02734300  | -1.73532200 | 0.17838200  |
| F | -0.95159500 | -4.60374300 | 2.08762400  |
| F | -1.83401300 | -2.95033300 | 3.85819900  |
| F | 0.70826200  | -3.00838700 | 4.18829700  |
| F | 0.85197300  | -0.85936500 | 5.29845900  |
| F | 2.75877800  | 0.54295100  | 4.50061200  |
| F | 3.95979900  | -1.38685500 | 3.27647400  |
| F | -2.28698600 | -2.42057200 | -3.98044300 |
| F | 0.14534700  | -2.15746300 | -4.73409900 |
| F | 1.75836100  | 4.27018700  | -2.50536900 |
| F | -0.52043900 | 5.01767500  | -1.83548600 |
| F | -0.91200600 | 5.03125300  | 0.55293000  |
| F | -3.20637200 | 3.86599900  | 0.41921200  |
| F | -4.82298200 | 1.76302600  | -0.34619300 |
| F | -4.77155300 | -0.46695400 | -1.53148000 |
| F | -3.91028900 | 0.92195000  | -3.35962400 |
| F | -2.10709500 | 0.04362200  | -4.67153900 |
| F | -1.48836600 | 3.46301900  | -3.51121000 |
| H | -4.00431000 | 2.83955400  | -2.94276100 |
| O | -3.64434300 | 2.99355700  | -2.04379400 |
| H | -4.33883100 | 2.56975500  | -1.29115300 |

PC

|   |             |             |             |
|---|-------------|-------------|-------------|
| C | -2.68635800 | -1.29177400 | 1.24584400  |
| C | -2.83357100 | -2.28826600 | 0.13830300  |
| C | -1.81579600 | -3.49184600 | 0.15164100  |
| C | -1.15551200 | -3.44827000 | -1.35084800 |
| C | 0.39104200  | -3.58760200 | -1.48464100 |
| C | 1.15050900  | -2.85937000 | -2.70730800 |
| C | 2.56662500  | -2.31789100 | -2.02017900 |
| C | 3.13723800  | -0.89810700 | -2.34719800 |
| C | 4.01512700  | -0.04442800 | -1.22457400 |
| C | 3.47048900  | 1.45804800  | -1.38833800 |
| C | 3.37502300  | 2.43963300  | -0.15950800 |
| C | 2.02287400  | 3.40596300  | -0.15051800 |
| C | 1.22383600  | 2.78146000  | 0.93504900  |
| C | -0.14205000 | 2.89571700  | 1.09158800  |
| C | -0.79076400 | 2.13303900  | 2.04359400  |
| C | -2.27048700 | 2.24925200  | 1.97937500  |
| C | -2.94685800 | 0.87198500  | 2.37370200  |
| C | -3.41635900 | 0.01851700  | 1.13813500  |
| C | -1.91047100 | -1.37371300 | 2.32147100  |
| C | -2.03956600 | -0.18938300 | 3.24473400  |
| C | -0.65603800 | 0.28495400  | 3.78234300  |
| C | -0.07473100 | 1.26875500  | 2.83883900  |
| C | 1.29152000  | 1.15236600  | 2.68489000  |
| C | 1.93468600  | 1.88486300  | 1.70886100  |
| C | 3.35728400  | 1.75967000  | 1.29520000  |
| C | 3.89239800  | 0.29570100  | 1.52936500  |
| C | 3.97925800  | -0.64647400 | 0.23159900  |
| C | 2.82561700  | -1.56876600 | 0.40575500  |
| C | 2.21378400  | -2.31968300 | -0.57712800 |
| C | 1.04572900  | -2.99749900 | -0.29308900 |
| C | 0.50841200  | -2.95070100 | 0.97233100  |
| C | -0.81693800 | -3.48041100 | 1.38437500  |
| C | -1.10386700 | -2.58019900 | 2.67578900  |
| C | 0.33622500  | -2.16799900 | 3.21991300  |
| C | 0.53803300  | -0.78625200 | 3.96132600  |
| C | 1.89225400  | 0.05854800  | 3.49025500  |
| C | 2.99706800  | -0.60424700 | 2.60199300  |
| C | 2.30844700  | -1.55102200 | 1.68672100  |
| C | 1.14168700  | -2.23130900 | 1.96827700  |
| C | -2.59643300 | -1.56974400 | -1.16553400 |
| C | -1.66259900 | -2.14581100 | -1.91668400 |
| C | -1.25857200 | -1.65218900 | -3.26742400 |
| C | 0.31987800  | -1.74765600 | -3.46460900 |

|   |             |             |             |
|---|-------------|-------------|-------------|
| C | 0.74125700  | -0.38228600 | -3.04464000 |
| C | 1.97271400  | 0.00092500  | -2.55440200 |
| C | 2.14245900  | 1.26713600  | -2.02948400 |
| C | 1.10041200  | 2.17141800  | -2.05519100 |
| C | 1.09037900  | 3.50582800  | -1.40292000 |
| C | -0.54398900 | 3.78270000  | -1.24457500 |
| C | -1.09196100 | 3.65504700  | 0.23229700  |
| C | -2.45864700 | 2.88044600  | 0.52015200  |
| C | -2.68246600 | 1.80933400  | -0.49995800 |
| C | -3.14575800 | 0.59806600  | -0.21360700 |
| C | -3.32105900 | -0.28209500 | -1.42372400 |
| C | -2.80410500 | 0.56805700  | -2.64236100 |
| C | -1.60496500 | -0.10008800 | -3.43478700 |
| C | -0.31277300 | 0.51150700  | -3.03258900 |
| C | -0.13084800 | 1.78501600  | -2.54570200 |
| C | -1.20218000 | 2.77775000  | -2.31384100 |
| C | -2.55867100 | 2.07459600  | -1.98172200 |
| F | -4.12582800 | -2.78088600 | 0.18141000  |
| F | -2.53643200 | -4.64125000 | 0.23777900  |
| F | -1.71637300 | -4.47387600 | -2.07578300 |
| F | 0.68158900  | -4.93176300 | -1.56009300 |
| F | 1.47348600  | -3.81154300 | -3.61655200 |
| F | 3.52737100  | -3.25552500 | -2.30288300 |
| F | 3.91124100  | -0.98305500 | -3.47667900 |
| F | 5.31192800  | -0.04888000 | -1.62454800 |
| F | 4.30118300  | 2.07149400  | -2.30486900 |
| F | 4.46203600  | 3.25056000  | -0.21236300 |
| F | 2.43796000  | 4.66744100  | 0.19212600  |
| F | -2.70366200 | 3.18397900  | 2.89196400  |
| F | -4.04582500 | 1.16409900  | 3.11955000  |
| F | -4.79132300 | -0.23509200 | 1.25494700  |
| F | -2.78820800 | -0.57547900 | 4.33148800  |
| F | -0.86689400 | 0.87672300  | 5.00763900  |
| F | 4.11208700  | 2.57805400  | 2.11234600  |
| F | 5.14805100  | 0.40719500  | 2.03190200  |
| F | 5.13755000  | -1.38552700 | 0.36889200  |
| F | -0.68858400 | -4.78178400 | 1.81372900  |
| F | -1.76935200 | -3.30185400 | 3.62956800  |
| F | 0.74977000  | -3.15647000 | 4.08460300  |
| F | 0.65769000  | -1.05128700 | 5.28543000  |
| F | 2.47624900  | 0.53920900  | 4.63485000  |
| F | 3.88874900  | -1.25398000 | 3.41688700  |
| F | -1.88975200 | -2.39628200 | -4.22742600 |
| F | 0.55968500  | -1.91046500 | -4.81108600 |

|    |             |             |             |
|----|-------------|-------------|-------------|
| F  | 1.57713500  | 4.47753900  | -2.24077900 |
| F  | -0.78702700 | 5.05077800  | -1.66011400 |
| F  | -1.22856800 | 4.93536300  | 0.72139300  |
| F  | -3.49118700 | 3.76869500  | 0.51159400  |
| F  | -4.66309600 | -0.58003200 | -1.60003500 |
| F  | -3.83029100 | 0.69134400  | -3.52994200 |
| F  | -1.82496900 | 0.12669500  | -4.77683400 |
| F  | -1.41455400 | 3.50368700  | -3.48655900 |
| O  | -3.61486500 | 2.91670100  | -2.31849400 |
| H  | -3.42573700 | 3.30148200  | -3.19297400 |
| F  | -5.64480100 | 1.98096100  | 0.09488300  |
| H  | -5.80589800 | 1.14853300  | 0.49320000  |
| IP |             |             |             |
| C  | 2.97937400  | -1.11593300 | -0.87723100 |
| C  | 3.36921100  | -1.42472700 | 0.53583000  |
| C  | 2.66116500  | -2.67008500 | 1.19648200  |
| C  | 2.03279700  | -2.05953900 | 2.58609300  |
| C  | 0.56477100  | -2.42729300 | 2.96020500  |
| C  | -0.32568900 | -1.37997600 | 3.80494700  |
| C  | -1.84022600 | -1.52132000 | 3.12859400  |
| C  | -2.72542200 | -0.26226200 | 2.84544700  |
| C  | -3.79770000 | -0.23153500 | 1.57687500  |
| C  | -3.62022800 | 1.24634300  | 0.97241600  |
| C  | -3.77954700 | 1.53270200  | -0.56865700 |
| C  | -2.69467100 | 2.63163200  | -1.18247400 |
| C  | -1.78832200 | 1.74615500  | -1.95819300 |
| C  | -0.49071100 | 2.04567100  | -2.31822800 |
| C  | 0.30351800  | 1.07187400  | -2.89307500 |
| C  | 1.71439300  | 1.49778200  | -3.07351200 |
| C  | 2.69222700  | 0.26587500  | -2.88453800 |
| C  | 3.38588500  | 0.21022000  | -1.46936800 |
| C  | 2.21969700  | -1.84525900 | -1.68874200 |
| C  | 2.04771600  | -1.23551300 | -3.05646200 |
| C  | 0.58287900  | -1.35922700 | -3.57360600 |
| C  | -0.20093500 | -0.18783200 | -3.11650600 |
| C  | -1.49818400 | -0.49031800 | -2.75759800 |
| C  | -2.27955300 | 0.46890000  | -2.14657900 |
| C  | -3.62516800 | 0.26804700  | -1.54666200 |
| C  | -3.80261200 | -1.20779800 | -1.02308200 |
| C  | -3.64329200 | -1.42570500 | 0.56016000  |
| C  | -2.30671500 | -2.06700800 | 0.67966700  |
| C  | -1.51876300 | -2.12725300 | 1.81096700  |
| C  | -0.22890400 | -2.60901300 | 1.72214100  |
| C  | 0.26177800  | -3.05530300 | 0.51710600  |



|   |             |             |             |
|---|-------------|-------------|-------------|
| C | 1.66792100  | -3.43765600 | 0.22726000  |
| C | 1.71442300  | -3.21067700 | -1.35498600 |
| C | 0.20912200  | -3.40243800 | -1.84263400 |
| C | -0.32621400 | -2.60407800 | -3.09762600 |
| C | -1.83543700 | -1.93019400 | -2.89661500 |
| C | -2.73707100 | -2.30517400 | -1.67374000 |
| C | -1.82885400 | -2.54878400 | -0.52360700 |
| C | -0.53913100 | -3.03076400 | -0.60926900 |
| C | 2.98333800  | -0.24248100 | 1.38866700  |
| C | 2.22566700  | -0.57273200 | 2.43032000  |
| C | 1.73842500  | 0.40458900  | 3.44967400  |
| C | 0.23073200  | 0.09818900  | 3.86541800  |
| C | -0.50844500 | 0.98993000  | 2.92854600  |
| C | -1.80291500 | 0.84215000  | 2.47571600  |
| C | -2.27457100 | 1.65004400  | 1.45949100  |
| C | -1.47531600 | 2.64888500  | 0.94209900  |
| C | -1.79153500 | 3.49287500  | -0.23868600 |
| C | -0.27105700 | 3.98562500  | -0.70739400 |
| C | 0.26876000  | 3.29231100  | -2.02170700 |
| C | 1.77213600  | 2.76092000  | -2.09291800 |
| C | 2.26823500  | 2.37067300  | -0.73757600 |
| C | 3.00206400  | 1.28785300  | -0.50106200 |
| C | 3.39202200  | 1.13172300  | 0.94794800  |
| C | 2.70513300  | 2.33153900  | 1.70131500  |
| C | 1.71062600  | 1.88715900  | 2.85207000  |
| C | 0.30436500  | 1.96424300  | 2.38114100  |
| C | -0.18018200 | 2.79346100  | 1.39642300  |
| C | 0.62224400  | 3.75368300  | 0.60952200  |
| C | 2.10087700  | 3.26732400  | 0.46700600  |
| F | 4.73906500  | -1.60846400 | 0.57146500  |
| F | 3.62931000  | -3.55515300 | 1.55252700  |
| F | 2.83138500  | -2.48741500 | 3.62089000  |
| F | 0.59967700  | -3.60670700 | 3.67054300  |
| F | -0.40095900 | -1.83668300 | 5.07909300  |
| F | -2.54782200 | -2.38891900 | 3.92140900  |
| F | -3.43974900 | 0.03920700  | 3.97727400  |
| F | -5.05032400 | -0.30813300 | 2.09325900  |
| F | -4.55675200 | 2.03714400  | 1.60817600  |
| F | -5.02638000 | 2.03625900  | -0.75276400 |
| F | -3.40200100 | 3.47158400  | -2.00449800 |
| F | 1.89673700  | 1.96725700  | -4.35501500 |
| F | 3.67027500  | 0.38891300  | -3.82037000 |
| F | 4.75845300  | 0.25182000  | -1.63402800 |
| F | 2.84620000  | -1.92764100 | -3.93657000 |

|   |             |             |             |
|---|-------------|-------------|-------------|
| F | 0.62720300  | -1.38355100 | -4.94984200 |
| F | -4.56542000 | 0.43551600  | -2.54415300 |
| F | -5.05722200 | -1.60057800 | -1.35960000 |
| F | -4.59585500 | -2.35873900 | 0.91857300  |
| F | 1.84145700  | -4.78483300 | 0.45107700  |
| F | 2.51512800  | -4.14584300 | -1.95305700 |
| F | 0.02782800  | -4.74188400 | -2.10656500 |
| F | -0.40116600 | -3.47797900 | -4.13124800 |
| F | -2.53416100 | -2.17304500 | -4.05195100 |
| F | -3.46254000 | -3.42655300 | -1.98659300 |
| F | 2.54294800  | 0.34364800  | 4.55560800  |
| F | 0.05884700  | 0.54371900  | 5.15744800  |
| F | -2.47997300 | 4.62382300  | 0.12224400  |
| F | -0.32563000 | 5.32050200  | -0.94463200 |
| F | 0.09743600  | 4.19169400  | -3.05045800 |
| F | 2.57917800  | 3.73099500  | -2.61856300 |
| F | 4.76520300  | 1.22803600  | 1.08635100  |
| F | 3.68597400  | 3.06345700  | 2.30116500  |
| F | 1.89121900  | 2.75663300  | 3.90685500  |
| F | 0.67565100  | 4.97105400  | 1.29042100  |
| O | 2.93391300  | 4.36568200  | 0.25543500  |
| H | 2.66493500  | 5.06925600  | 0.87301500  |

C<sub>1</sub>-S<sub>N</sub>2'-C60-F<sub>b</sub>

RC

|   |             |             |             |
|---|-------------|-------------|-------------|
| C | -2.65426000 | -1.52715400 | 0.97793600  |
| C | -2.76580200 | -2.35211500 | -0.25677700 |
| C | -1.71910900 | -3.51585000 | -0.42627200 |
| C | -1.04825300 | -3.20344700 | -1.88658500 |
| C | 0.49859700  | -3.29581000 | -2.03151100 |
| C | 1.25393200  | -2.36614400 | -3.11526300 |
| C | 2.64224300  | -1.90359300 | -2.33231400 |
| C | 3.18347200  | -0.43960800 | -2.43396300 |
| C | 4.01926000  | 0.24844100  | -1.17411500 |
| C | 3.43933100  | 1.74372500  | -1.11081100 |
| C | 3.29002300  | 2.50862700  | 0.26121800  |
| C | 1.91041300  | 3.41298900  | 0.40206800  |
| C | 1.11723700  | 2.60411300  | 1.36263300  |
| C | -0.25229200 | 2.65894200  | 1.52749600  |
| C | -0.87623900 | 1.73288200  | 2.34246700  |
| C | -2.35579400 | 1.80834600  | 2.28157900  |
| C | -3.02089200 | 0.38115300  | 2.45934000  |
| C | -3.54956200 | -0.32525300 | 1.12888700  |
| C | -1.88077400 | -1.76267200 | 2.03258800  |
| C | -2.06895800 | -0.76984800 | 3.14431400  |

|   |             |             |             |
|---|-------------|-------------|-------------|
| C | -0.70383400 | -0.35113300 | 3.77358400  |
| C | -0.13941800 | 0.78335900  | 3.00712700  |
| C | 1.22989300  | 0.73214400  | 2.85013400  |
| C | 1.85179400  | 1.62216300  | 1.99884300  |
| C | 3.28130200  | 1.60708400  | 1.59017500  |
| C | 3.86290500  | 0.14523900  | 1.59987500  |
| C | 3.98821200  | -0.57586800 | 0.17075100  |
| C | 2.86032600  | -1.54373800 | 0.18491800  |
| C | 2.27650500  | -2.14057200 | -0.91273600 |
| C | 1.12954500  | -2.88995400 | -0.75427000 |
| C | 0.58379500  | -3.06447200 | 0.49616200  |
| C | -0.73327600 | -3.67999400 | 0.80217300  |
| C | -1.05559900 | -2.99610200 | 2.20733500  |
| C | 0.36573100  | -2.65272400 | 2.83545000  |
| C | 0.52222400  | -1.40443800 | 3.79163700  |
| C | 1.85736200  | -0.45800400 | 3.47855500  |
| C | 2.98891900  | -0.93927900 | 2.50802800  |
| C | 2.33567100  | -1.74769100 | 1.44674900  |
| C | 1.18836700  | -2.49735600 | 1.60257300  |
| C | -2.53396500 | -1.41299500 | -1.40080800 |
| C | -1.57217000 | -1.83049200 | -2.22346900 |
| C | -1.17537200 | -1.14611100 | -3.48885600 |
| C | 0.40078300  | -1.17586000 | -3.71306700 |
| C | 0.79968800  | 0.14166500  | -3.13641200 |
| C | 2.00944500  | 0.46593900  | -2.54884700 |
| C | 2.13884100  | 1.63846600  | -1.82819500 |
| C | 1.07856500  | 2.52034800  | -1.74315200 |
| C | 0.99711400  | 3.69503800  | -0.83297200 |
| C | -0.64815400 | 3.87118400  | -0.64770300 |
| C | -1.22590000 | 3.50832300  | 0.78115900  |
| C | -2.55817300 | 2.63489700  | 0.93962300  |
| C | -2.74363400 | 1.72393400  | -0.22821300 |
| C | -3.67653100 | 0.54839700  | -0.16503700 |
| C | -3.39661300 | -0.19148000 | -1.54138400 |
| C | -2.73532400 | 0.89249200  | -2.46804100 |
| C | -1.57182100 | 0.39071100  | -3.44543000 |
| C | -0.27183200 | 1.01070600  | -3.03269800 |
| C | -0.12231000 | 2.20040300  | -2.34275700 |
| C | -1.27045500 | 3.00630400  | -1.83428100 |
| C | -2.27086500 | 1.94779900  | -1.45506400 |
| F | -4.04707900 | -2.86925800 | -0.32003600 |
| F | -2.41022100 | -4.68083900 | -0.54097900 |
| F | -1.59211100 | -4.09112700 | -2.78599700 |
| F | 0.81319500  | -4.60540600 | -2.31717100 |

|    |                                                          |             |             |
|----|----------------------------------------------------------|-------------|-------------|
| F  | 1.61558700                                               | -3.16068100 | -4.15279600 |
| F  | 3.63125200                                               | -2.76451700 | -2.73877500 |
| F  | 3.98862000                                               | -0.34750000 | -3.54140200 |
| F  | 5.32103200                                               | 0.33955000  | -1.54868400 |
| F  | 4.28139200                                               | 2.51682400  | -1.88641300 |
| F  | 4.34786500                                               | 3.35402000  | 0.35841300  |
| F  | 2.27677600                                               | 4.61571200  | 0.95432300  |
| F  | -2.80874800                                              | 2.59268700  | 3.32114100  |
| F  | -4.09185600                                              | 0.55368200  | 3.27776400  |
| F  | -4.81191100                                              | -0.80917300 | 1.39806600  |
| F  | -2.80496800                                              | -1.36960900 | 4.13942200  |
| F  | -0.94029800                                              | 0.02846200  | 5.07559900  |
| F  | 3.99867100                                               | 2.31111700  | 2.53744100  |
| F  | 5.11100800                                               | 0.21536000  | 2.12817600  |
| F  | 5.16618800                                               | -1.29549900 | 0.20530600  |
| F  | -0.58103700                                              | -5.02924900 | 1.02716400  |
| F  | -1.72492500                                              | -3.86566100 | 3.02595800  |
| F  | 0.78791500                                               | -3.75976500 | 3.53726900  |
| F  | 0.64126700                                               | -1.87530600 | 5.05702300  |
| F  | 2.41825400                                               | -0.15063200 | 4.69196100  |
| F  | 3.89521000                                               | -1.68211300 | 3.22049200  |
| F  | -1.79697200                                              | -1.77150800 | -4.53755900 |
| F  | 0.61833100                                               | -1.16341500 | -5.07312900 |
| F  | 1.44805800                                               | 4.83128600  | -1.45848100 |
| F  | -0.92234100                                              | 5.18206400  | -0.88506600 |
| F  | -1.42993600                                              | 4.69577800  | 1.45089800  |
| F  | -3.66294000                                              | 3.42969600  | 1.09857300  |
| F  | -4.96560000                                              | 1.03224000  | -0.19245100 |
| F  | -4.58883300                                              | -0.60000500 | -2.08467500 |
| F  | -3.71757400                                              | 1.43710200  | -3.25174700 |
| F  | -1.90776300                                              | 0.76842200  | -4.72187200 |
| F  | -1.76826800                                              | 3.83559800  | -2.81659700 |
| H  | -3.92032100                                              | 5.22884200  | -0.35028900 |
| O  | -3.74442800                                              | 4.81346400  | -1.20695200 |
| H  | -3.23528500                                              | 5.47204500  | -1.70077800 |
| TS | imaginary vibrational frequency -762.25 cm <sup>-1</sup> |             |             |
| C  | 2.70324100                                               | -1.50104800 | -0.86366500 |
| C  | 2.97485100                                               | -2.00748100 | 0.51077900  |
| C  | 2.05429800                                               | -3.17482200 | 1.02606000  |
| C  | 1.46386200                                               | -2.59119100 | 2.43896400  |
| C  | -0.05538600                                              | -2.75548700 | 2.73181000  |
| C  | -0.80737300                                              | -1.65816800 | 3.64384900  |
| C  | -2.28903000                                              | -1.49001000 | 2.90513400  |
| C  | -2.94810600                                              | -0.08477200 | 2.71929000  |

|   |             |             |             |
|---|-------------|-------------|-------------|
| C | -3.93358300 | 0.23489300  | 1.41806900  |
| C | -3.49136900 | 1.70849600  | 0.96598800  |
| C | -3.52070700 | 2.15137200  | -0.54806600 |
| C | -2.25094200 | 3.11041200  | -1.01713200 |
| C | -1.47264500 | 2.18097100  | -1.87948500 |
| C | -0.13817000 | 2.30655200  | -2.19525700 |
| C | 0.52871500  | 1.27342200  | -2.84341300 |
| C | 2.02012700  | 1.44984400  | -2.81466000 |
| C | 2.77812000  | 0.05603800  | -2.74525600 |
| C | 3.45542900  | -0.29081800 | -1.34328300 |
| C | 1.87793200  | -2.01924100 | -1.76599200 |
| C | 1.89438600  | -1.28469400 | -3.07729000 |
| C | 0.46331100  | -1.12392400 | -3.67858500 |
| C | -0.15415500 | 0.12923800  | -3.18003300 |
| C | -1.49914400 | 0.00527800  | -2.87565000 |
| C | -2.14859800 | 1.01667200  | -2.19955400 |
| C | -3.52864500 | 0.97681400  | -1.64326400 |
| C | -3.96327100 | -0.48933500 | -1.26742300 |
| C | -3.92260600 | -0.87001700 | 0.29429500  |
| C | -2.71486800 | -1.72970000 | 0.39873300  |
| C | -2.00575300 | -2.01961800 | 1.54650000  |
| C | -0.80814200 | -2.69813300 | 1.45652700  |
| C | -0.33760600 | -3.11183400 | 0.23216400  |
| C | 1.00410900  | -3.68481000 | -0.04562800 |
| C | 1.16204400  | -3.31742000 | -1.59189200 |
| C | -0.32272900 | -3.22460300 | -2.15146200 |
| C | -0.65805600 | -2.23975900 | -3.34323400 |
| C | -2.04793900 | -1.35056600 | -3.13606000 |
| C | -3.05488500 | -1.67873200 | -1.98162900 |
| C | -2.25948200 | -2.17140600 | -0.82843700 |
| C | -1.06434100 | -2.85218300 | -0.91477600 |
| C | 2.74142200  | -0.85451100 | 1.44327100  |
| C | 1.89224300  | -1.14543600 | 2.42463700  |
| C | 1.53074100  | -0.20912400 | 3.52769000  |
| C | -0.02312400 | -0.30267700 | 3.87577500  |
| C | -0.56970600 | 0.79089600  | 3.02490800  |
| C | -1.84587200 | 0.88893200  | 2.50400800  |
| C | -2.13069500 | 1.84589300  | 1.54974700  |
| C | -1.16114700 | 2.74654900  | 1.16406100  |
| C | -1.27100100 | 3.71445200  | 0.04403200  |
| C | 0.31860500  | 3.97779500  | -0.31803100 |
| C | 0.82355400  | 3.31526900  | -1.65389300 |
| C | 2.07302800  | 2.39222800  | -1.57915100 |
| C | 2.34419600  | 1.76993300  | -0.36235700 |

|   |             |             |             |
|---|-------------|-------------|-------------|
| C | 3.48707900  | 0.83666400  | -0.28865300 |
| C | 3.48754500  | 0.42462100  | 1.21627400  |
| C | 2.87513900  | 1.67180100  | 1.99028500  |
| C | 1.77547500  | 1.30713200  | 3.08931700  |
| C | 0.41234800  | 1.67231800  | 2.61111500  |
| C | 0.10937400  | 2.64940000  | 1.69209500  |
| C | 1.10896700  | 3.49775100  | 1.00175300  |
| C | 2.37689700  | 2.63748000  | 0.81283000  |
| F | 4.29926400  | -2.40414000 | 0.57365400  |
| F | 2.85463600  | -4.23025800 | 1.33226200  |
| F | 2.14189800  | -3.21858500 | 3.45901700  |
| F | -0.23447300 | -3.98333600 | 3.32924600  |
| F | -1.01897600 | -2.21221500 | 4.86321000  |
| F | -3.16211000 | -2.30125300 | 3.58524100  |
| F | -3.66865300 | 0.21734100  | 3.84716400  |
| F | -5.20718300 | 0.31886100  | 1.87976800  |
| F | -4.32434800 | 2.58417800  | 1.63515500  |
| F | -4.66106800 | 2.86765700  | -0.72289300 |
| F | -2.78120500 | 4.14086700  | -1.75257300 |
| F | 2.44510200  | 2.10798600  | -3.94293000 |
| F | 3.76867000  | 0.11407500  | -3.67450900 |
| F | 4.75335800  | -0.68490400 | -1.58793000 |
| F | 2.61892900  | -2.03715700 | -3.97434900 |
| F | 0.59143700  | -1.06821400 | -5.04859500 |
| F | -4.39365800 | 1.38844600  | -2.63866000 |
| F | -5.24614600 | -0.64283700 | -1.68400600 |
| F | -5.02990400 | -1.66182400 | 0.52649600  |
| F | 0.95918000  | -5.05735300 | 0.04979000  |
| F | 1.84738800  | -4.30065000 | -2.25409600 |
| F | -0.69824500 | -4.48807400 | -2.55087600 |
| F | -0.82135100 | -2.99860100 | -4.45538200 |
| F | -2.72444800 | -1.39321200 | -4.32977500 |
| F | -3.93198300 | -2.63608200 | -2.42609300 |
| F | 2.27193700  | -0.51155200 | 4.63865000  |
| F | -0.16765900 | 0.02781200  | 5.20488800  |
| F | -1.78372100 | 4.91302400  | 0.47721800  |
| F | 0.49636100  | 5.31847600  | -0.43689500 |
| F | 1.01251200  | 4.31879600  | -2.57452300 |
| F | 3.34925200  | 3.55553700  | -1.79263500 |
| F | 4.71180700  | 1.52939100  | -0.48321800 |
| F | 4.77272900  | 0.21972400  | 1.66681900  |
| F | 3.91696600  | 2.29035400  | 2.64667500  |
| F | 2.09141800  | 2.01952800  | 4.22330700  |
| F | 1.40239000  | 4.61024800  | 1.75836500  |

|    |             |             |             |
|----|-------------|-------------|-------------|
| H  | 4.33427400  | 3.37449400  | 0.96239900  |
| O  | 3.50131500  | 3.70637200  | 0.56917200  |
| H  | 3.57651400  | 3.72050000  | -0.57914300 |
| PC |             |             |             |
| C  | 2.50975300  | -1.75351100 | -0.92590800 |
| C  | 2.80602400  | -2.24638900 | 0.44536200  |
| C  | 1.81725600  | -3.31715700 | 1.04042000  |
| C  | 1.34359900  | -2.64283400 | 2.45388200  |
| C  | -0.17093500 | -2.66963700 | 2.82027000  |
| C  | -0.78620700 | -1.48531200 | 3.72511100  |
| C  | -2.28290300 | -1.21079000 | 3.04526100  |
| C  | -2.82234400 | 0.24145400  | 2.82923600  |
| C  | -3.83716500 | 0.60517200  | 1.56193500  |
| C  | -3.28432700 | 2.01542200  | 1.03279800  |
| C  | -3.35253000 | 2.41295100  | -0.49095800 |
| C  | -2.02759500 | 3.24311800  | -1.05367200 |
| C  | -1.38446800 | 2.22394100  | -1.92573100 |
| C  | -0.05975900 | 2.21830900  | -2.29752700 |
| C  | 0.47816400  | 1.10770100  | -2.94199900 |
| C  | 1.97685300  | 1.13750600  | -2.92716600 |
| C  | 2.62645700  | -0.29538700 | -2.87094700 |
| C  | 3.35526900  | -0.64387300 | -1.49424600 |
| C  | 1.60299600  | -2.23426200 | -1.77053500 |
| C  | 1.62153700  | -1.56065200 | -3.11141600 |
| C  | 0.18193100  | -1.30274600 | -3.66673600 |
| C  | -0.31264800 | 0.01725300  | -3.20449800 |
| C  | -1.64759500 | 0.02185500  | -2.83545300 |
| C  | -2.17326600 | 1.11116700  | -2.17111700 |
| C  | -3.51900900 | 1.20789000  | -1.54124000 |
| C  | -4.05484000 | -0.20419000 | -1.08865000 |
| C  | -3.97397700 | -0.53431400 | 0.48348600  |
| C  | -2.84025400 | -1.49231000 | 0.56942500  |
| C  | -2.10868300 | -1.80882400 | 1.69648500  |
| C  | -0.97671500 | -2.58910400 | 1.57942400  |
| C  | -0.59707200 | -3.07767700 | 0.35149100  |
| C  | 0.67823100  | -3.77147600 | 0.03743800  |
| C  | 0.79524400  | -3.46575700 | -1.52318100 |
| C  | -0.70118200 | -3.27051400 | -2.02367300 |
| C  | -1.01143800 | -2.30555300 | -3.23789400 |
| C  | -2.31451700 | -1.29487100 | -3.00719200 |
| C  | -3.28533600 | -1.49184200 | -1.79423600 |
| C  | -2.47842100 | -2.00884100 | -0.65958500 |
| C  | -1.35130600 | -2.79361800 | -0.77184700 |
| C  | 2.71369700  | -1.04763900 | 1.34100700  |

|   |             |             |             |
|---|-------------|-------------|-------------|
| C | 1.89181100  | -1.24015800 | 2.37094900  |
| C | 1.65984300  | -0.25108700 | 3.46233000  |
| C | 0.11969500  | -0.19736600 | 3.86786300  |
| C | -0.36272200 | 0.89563200  | 2.97963000  |
| C | -1.64670400 | 1.09422900  | 2.51645300  |
| C | -1.88621300 | 2.03734500  | 1.53687200  |
| C | -0.85625300 | 2.82488300  | 1.06986600  |
| C | -0.93934100 | 3.78156500  | -0.06002000 |
| C | 0.65234800  | 3.90402100  | -0.49820000 |
| C | 1.02872100  | 3.13483400  | -1.81273300 |
| C | 2.12997100  | 2.06530700  | -1.71762000 |
| C | 2.75520500  | 1.71684400  | -0.59919700 |
| C | 3.65314500  | 0.52284700  | -0.48259100 |
| C | 3.57921100  | 0.14773600  | 1.05567400  |
| C | 3.11660200  | 1.45123100  | 1.83772500  |
| C | 2.01053200  | 1.21335500  | 2.95395300  |
| C | 0.67576800  | 1.65942900  | 2.47977800  |
| C | 0.42816100  | 2.62567100  | 1.53521300  |
| C | 1.45782300  | 3.39813600  | 0.80617900  |
| C | 2.76906700  | 2.54845700  | 0.65694600  |
| F | 4.09365900  | -2.75081700 | 0.45878600  |
| F | 2.54300800  | -4.42488300 | 1.34685800  |
| F | 2.01366700  | -3.29163300 | 3.46526400  |
| F | -0.41948100 | -3.85930300 | 3.46753400  |
| F | -0.98632500 | -1.97904300 | 4.97146300  |
| F | -3.19158800 | -1.91381600 | 3.79434500  |
| F | -3.45232700 | 0.65468300  | 3.97525300  |
| F | -5.07466800 | 0.82129800  | 2.07464900  |
| F | -3.99255800 | 2.98626900  | 1.71353600  |
| F | -4.43350700 | 3.22125300  | -0.63632100 |
| F | -2.50334600 | 4.29832100  | -1.78953100 |
| F | 2.45299800  | 1.77387500  | -4.05605700 |
| F | 3.56436600  | -0.34071900 | -3.85284400 |
| F | 4.57649200  | -1.20070900 | -1.80629900 |
| F | 2.24077400  | -2.40992400 | -4.00033400 |
| F | 0.25985100  | -1.31831200 | -5.04088900 |
| F | -4.40018600 | 1.65935800  | -2.50401500 |
| F | -5.36408500 | -0.26273700 | -1.44168200 |
| F | -5.13308800 | -1.21711800 | 0.79433600  |
| F | 0.52459800  | -5.13119000 | 0.18298300  |
| F | 1.37279100  | -4.51779000 | -2.18143700 |
| F | -1.19401300 | -4.51303800 | -2.35482400 |
| F | -1.28959400 | -3.08830500 | -4.30941900 |
| F | -3.05025900 | -1.33208800 | -4.16518700 |



|    |             |             |             |
|----|-------------|-------------|-------------|
| F  | -4.26044400 | -2.38731100 | -2.15601500 |
| F  | 2.41727200  | -0.58698300 | 4.55134200  |
| F  | 0.05095000  | 0.20515100  | 5.18283700  |
| F  | -1.32817900 | 5.02490600  | 0.37545400  |
| F  | 0.92790500  | 5.21545400  | -0.68479200 |
| F  | 1.29391800  | 4.05697200  | -2.79587500 |
| F  | 4.94332900  | 0.95187500  | -0.72155400 |
| F  | 4.84064300  | -0.19294000 | 1.48413100  |
| F  | 4.21368800  | 1.92511900  | 2.50302000  |
| F  | 2.37953000  | 1.95753200  | 4.05459800  |
| F  | 1.80514900  | 4.52284900  | 1.54811100  |
| O  | 3.88767800  | 3.41048800  | 0.56550800  |
| H  | 3.92373600  | 3.94869800  | 1.37665600  |
| F  | 3.63329800  | 4.58001700  | -1.75767100 |
| H  | 3.97157800  | 4.27549000  | -0.92869000 |
| IP |             |             |             |
| C  | 2.80743500  | 1.52968500  | -0.30104600 |
| C  | 3.28590500  | 0.62942000  | -1.38348600 |
| C  | 2.59059800  | 0.78462200  | -2.78751300 |
| C  | 2.06643800  | -0.73056600 | -3.11319000 |
| C  | 0.61841200  | -0.91491200 | -3.65981700 |
| C  | -0.18495800 | -2.27200500 | -3.32665300 |
| C  | -1.74394100 | -1.74590100 | -3.05483500 |
| C  | -2.59975700 | -2.31751900 | -1.87722500 |
| C  | -3.74267400 | -1.38253400 | -1.10740600 |
| C  | -3.54185100 | -1.74592900 | 0.44198200  |
| C  | -3.78307900 | -0.68256300 | 1.58258600  |
| C  | -2.70908500 | -0.75841900 | 2.84871300  |
| C  | -1.91646900 | 0.48666300  | 2.65212600  |
| C  | -0.65251000 | 0.71640100  | 3.15093100  |
| C  | 0.07653800  | 1.82065200  | 2.70714600  |
| C  | 1.53624200  | 1.67169700  | 3.01727000  |
| C  | 2.48445900  | 2.35737100  | 1.96455200  |
| C  | 3.35562500  | 1.34291900  | 1.08890600  |
| C  | 1.97668300  | 2.55970900  | -0.42453400 |
| C  | 1.76822100  | 3.31381700  | 0.85570400  |
| C  | 0.27813900  | 3.74175300  | 1.06332800  |
| C  | -0.46746400 | 2.68016300  | 1.78577100  |
| C  | -1.74495200 | 2.45905500  | 1.29776800  |
| C  | -2.45340500 | 1.34830100  | 1.70676700  |
| C  | -3.74454400 | 0.86145000  | 1.14554100  |
| C  | -3.93179600 | 1.28848800  | -0.36092700 |
| C  | -3.68973400 | 0.14801100  | -1.46965900 |
| C  | -2.37094400 | 0.51600900  | -2.04888200 |

|   |             |             |             |
|---|-------------|-------------|-------------|
| C | -1.52328500 | -0.30561300 | -2.76459300 |
| C | -0.25788500 | 0.13653600  | -3.09157500 |
| C | 0.14504200  | 1.40264100  | -2.73738900 |
| C | 1.52021300  | 1.95174200  | -2.85381300 |
| C | 1.47404300  | 3.08184600  | -1.72982800 |
| C | -0.05573900 | 3.50046400  | -1.61814700 |
| C | -0.64053300 | 4.01051600  | -0.23899500 |
| C | -2.11528300 | 3.36062100  | 0.17535000  |
| C | -2.94459000 | 2.52273000  | -0.85442200 |
| C | -1.97926600 | 1.79910000  | -1.72023300 |
| C | -0.71778700 | 2.24051600  | -2.05530100 |
| C | 2.98858600  | -0.76554500 | -0.91947900 |
| C | 2.29120900  | -1.46338900 | -1.81394900 |
| C | 1.91465500  | -2.89752300 | -1.65793700 |
| C | 0.42564900  | -3.15687400 | -2.16760000 |
| C | -0.33640000 | -2.97531500 | -0.90196200 |
| C | -1.65842900 | -2.60424800 | -0.76444400 |
| C | -2.15574800 | -2.27906500 | 0.48186300  |
| C | -1.35101500 | -2.38714200 | 1.59386100  |
| C | -1.70685400 | -1.95777700 | 2.96717300  |
| C | -0.21287500 | -1.77172200 | 3.64111400  |
| C | 0.25525600  | -0.28353600 | 3.81742100  |
| C | 1.54627000  | 0.14740600  | 3.11483700  |
| C | 2.30649700  | -0.64525700 | 2.37494400  |
| C | 3.45454200  | -0.15916200 | 1.54534800  |
| C | 3.55513500  | -1.24041100 | 0.39056800  |
| C | 2.86451800  | -2.56875700 | 0.92714000  |
| C | 1.90770200  | -3.29514600 | -0.11771100 |
| C | 0.47964400  | -3.04748900 | 0.21216000  |
| C | -0.03010900 | -2.76315200 | 1.45537700  |
| C | 0.75985400  | -2.64504600 | 2.69868400  |
| C | 2.21520000  | -2.14829700 | 2.38749200  |
| F | 4.65078600  | 0.80267500  | -1.52329800 |
| F | 3.55662800  | 1.08002700  | -3.69731200 |
| F | 2.92001200  | -1.26980000 | -4.04795200 |
| F | 0.67365200  | -0.79051200 | -5.03009000 |
| F | -0.19839500 | -3.03015700 | -4.45027900 |
| F | -2.43006300 | -1.92338400 | -4.22921100 |
| F | -3.23837400 | -3.45354500 | -2.30391500 |
| F | -4.96569800 | -1.83978000 | -1.47681700 |
| F | -4.40407200 | -2.79189000 | 0.70700100  |
| F | -5.02075000 | -0.92462100 | 2.08549800  |
| F | -3.44910800 | -0.69645100 | 4.00243900  |
| F | 1.82001100  | 2.21161600  | 4.25825500  |

|   |             |             |             |
|---|-------------|-------------|-------------|
| F | 3.34813400  | 3.13862800  | 2.66521200  |
| F | 4.64670300  | 1.82425700  | 1.06993900  |
| F | 2.50309100  | 4.47602900  | 0.78137800  |
| F | 0.28159700  | 4.89726700  | 1.81197700  |
| F | -4.76084700 | 1.48242900  | 1.84582800  |
| F | -5.21581400 | 1.70817400  | -0.49504200 |
| F | -4.65136300 | 0.34523500  | -2.44065300 |
| F | 1.67675400  | 2.58086600  | -4.06765600 |
| F | 2.22749700  | 4.16386200  | -2.09785600 |
| F | -0.28558400 | 4.48987200  | -2.54800600 |
| F | -0.80646000 | 5.35187800  | -0.34789100 |
| F | -2.89320600 | 4.40195100  | 0.61654100  |
| F | -3.72024200 | 3.38298400  | -1.59105800 |
| F | 2.79019800  | -3.67791400 | -2.36327200 |
| F | 0.34961800  | -4.47015000 | -2.57430400 |
| F | -2.32902200 | -2.97335400 | 3.65260600  |
| F | -0.24169800 | -2.34480000 | 4.87031700  |
| F | 0.34798700  | -0.02408600 | 5.17106800  |
| F | 4.59867600  | -0.27915900 | 2.30457500  |
| F | 4.88371300  | -1.50228000 | 0.15128200  |
| F | 3.86713500  | -3.45858800 | 1.19532900  |
| F | 2.17041600  | -4.64629800 | -0.03841400 |
| F | 0.89257200  | -3.89967500 | 3.28218300  |
| O | 3.08213900  | -2.56617100 | 3.40289000  |
| H | 3.07805400  | -3.53932900 | 3.42203100  |

C<sub>1</sub>-S<sub>N</sub>2'-C52-F<sub>c</sub>

RC

|   |             |             |             |
|---|-------------|-------------|-------------|
| C | 2.60611500  | -1.67237900 | -0.81667300 |
| C | 2.78468200  | -2.24703600 | 0.54554600  |
| C | 1.75885400  | -3.35693600 | 0.98543200  |
| C | 1.15795200  | -2.77292200 | 2.39244200  |
| C | -0.37815500 | -2.83532100 | 2.63105800  |
| C | -1.08787500 | -1.71639700 | 3.55594400  |
| C | -2.51689100 | -1.41052000 | 2.77001700  |
| C | -3.06563700 | 0.04593300  | 2.62059000  |
| C | -3.96961900 | 0.48204500  | 1.29714400  |
| C | -3.40802000 | 1.93799900  | 0.92283200  |
| C | -3.33538400 | 2.42718800  | -0.57551000 |
| C | -1.97277700 | 3.28663800  | -0.95424500 |
| C | -1.22285200 | 2.30753200  | -1.78222000 |
| C | 0.13467900  | 2.32939500  | -2.02489000 |
| C | 0.72990600  | 1.27101400  | -2.68549300 |
| C | 2.21188700  | 1.36226600  | -2.71245400 |
| C | 2.87991400  | -0.07635900 | -2.64967000 |

|   |             |             |             |
|---|-------------|-------------|-------------|
| C | 3.48066400  | -0.52011600 | -1.23724500 |
| C | 1.78335400  | -2.10297200 | -1.76697500 |
| C | 1.90515100  | -1.33828500 | -3.05497300 |
| C | 0.50575500  | -1.04752300 | -3.68268400 |
| C | -0.03021600 | 0.21172100  | -3.11810200 |
| C | -1.39004900 | 0.19094900  | -2.88440800 |
| C | -1.97925400 | 1.22464900  | -2.18569900 |
| C | -3.38615900 | 1.28957900  | -1.70905500 |
| C | -3.95322900 | -0.14732400 | -1.41159100 |
| C | -3.99809500 | -0.58308900 | 0.13302500  |
| C | -2.86257200 | -1.53479300 | 0.24494900  |
| C | -2.21896300 | -1.91213400 | 1.40462100  |
| C | -1.07528400 | -2.67957800 | 1.33323400  |
| C | -0.59126400 | -3.08892500 | 0.11233800  |
| C | 0.71465900  | -3.75194600 | -0.13791500 |
| C | 0.95999200  | -3.34670800 | -1.66190500 |
| C | -0.49387800 | -3.12782700 | -2.27071400 |
| C | -0.70957000 | -2.08517200 | -3.43823800 |
| C | -2.03655700 | -1.09698400 | -3.24247000 |
| C | -3.11376200 | -1.38421800 | -2.14135100 |
| C | -2.40041400 | -1.97554900 | -0.98025800 |
| C | -1.25541300 | -2.74144400 | -1.04934600 |
| C | 2.60013200  | -1.10901700 | 1.50158900  |
| C | 1.68442000  | -1.36058400 | 2.43605300  |
| C | 1.34398900  | -0.44905700 | 3.56801300  |
| C | -0.21774200 | -0.43452700 | 3.87450900  |
| C | -0.65691100 | 0.75191700  | 3.08216600  |
| C | -1.89660200 | 0.95812900  | 2.50369800  |
| C | -2.07249600 | 1.97314700  | 1.58187000  |
| C | -1.02734100 | 2.82639400  | 1.28082100  |
| C | -1.00106400 | 3.80310100  | 0.15611100  |
| C | 0.63093400  | 3.93733000  | -0.14344800 |
| C | 1.13174800  | 3.30653500  | -1.50463700 |
| C | 2.45835100  | 2.41999800  | -1.55335500 |
| C | 2.68890300  | 1.72645400  | -0.25312000 |
| C | 3.64585000  | 0.57988000  | -0.13967600 |
| C | 3.45459700  | 0.11634100  | 1.36388300  |
| C | 2.82592600  | 1.35404400  | 2.09944800  |
| C | 1.72353600  | 1.05203800  | 3.21768800  |
| C | 0.39883400  | 1.58876700  | 2.76561500  |
| C | 0.20432700  | 2.62931200  | 1.87307300  |
| C | 1.31970000  | 3.31324400  | 1.15358500  |
| C | 2.29253300  | 2.18867100  | 0.93167300  |
| F | 4.07306100  | -2.74207700 | 0.64257800  |

|    |                                 |             |                          |
|----|---------------------------------|-------------|--------------------------|
| F  | 2.46639200                      | -4.47829000 | 1.28460000               |
| F  | 1.75601100                      | -3.47221000 | 3.41516500               |
| F  | -0.66433600                     | -4.06641100 | 3.17690000               |
| F  | -1.39109000                     | -2.29993600 | 4.74169300               |
| F  | -3.47617500                     | -2.17922300 | 3.38057400               |
| F  | -3.81522000                     | 0.34604100  | 3.73030200               |
| F  | -5.25194900                     | 0.64175300  | 1.71325600               |
| F  | -4.21829400                     | 2.84377500  | 1.57897100               |
| F  | -4.40443400                     | 3.23941500  | -0.77612100              |
| F  | -2.37756700                     | 4.35981500  | -1.70861100              |
| F  | 2.61377800                      | 1.93932200  | -3.89677000              |
| F  | 3.90748900                      | -0.06501100 | -3.53854300              |
| F  | 4.73721100                      | -1.03819300 | -1.46777600              |
| F  | 2.59777900                      | -2.11528100 | -3.95350900              |
| F  | 0.67544900                      | -0.92377200 | -5.04303500              |
| F  | -4.15784400                     | 1.80119000  | -2.73356900              |
| F  | -5.22673700                     | -0.18056200 | -1.87885900              |
| F  | -5.16799100                     | -1.29783200 | 0.29794700               |
| F  | 0.56554200                      | -5.11926000 | -0.09383300              |
| F  | 1.59566500                      | -4.35587300 | -2.33412600              |
| F  | -0.94034800                     | -4.34790600 | -2.72662700              |
| F  | -0.88599700                     | -2.78938700 | -4.58273500              |
| F  | -2.66113700                     | -1.02825400 | -4.46172700              |
| F  | -4.04644100                     | -2.25019600 | -2.65212700              |
| F  | 2.02468200                      | -0.86656100 | 4.68148500               |
| F  | -0.36484900                     | -0.16686000 | 5.21755700               |
| F  | -1.42976400                     | 5.03941500  | 0.57009700               |
| F  | 0.92545800                      | 5.25917400  | -0.17190000              |
| F  | 1.28715400                      | 4.33820300  | -2.40127900              |
| F  | 3.54988100                      | 3.18715900  | -1.86077100              |
| F  | 4.92913100                      | 1.08866100  | -0.26929600              |
| F  | 4.68052800                      | -0.17558200 | 1.90966500               |
| F  | 3.84809100                      | 2.04293400  | 2.71398300               |
| F  | 2.12988900                      | 1.66022200  | 4.37957500               |
| F  | 1.89102200                      | 4.30960900  | 1.91000900               |
| H  | 5.12437100                      | 3.55011200  | 0.25580500               |
| O  | 4.50838200                      | 4.15725400  | 0.69306500               |
| H  | 4.68242300                      | 4.03033600  | 1.63746900               |
| TS | imaginary vibrational frequency |             | -846.80 cm <sup>-1</sup> |
| C  | 2.73689100                      | 0.51751300  | 1.51172000               |
| C  | 2.86203900                      | 1.92933200  | 1.05613100               |
| C  | 1.87391100                      | 2.97727000  | 1.69310600               |
| C  | 1.14309700                      | 3.63908800  | 0.38676800               |
| C  | -0.39968800                     | 3.83952000  | 0.40945700               |

|   |             |             |             |
|---|-------------|-------------|-------------|
| C | -1.24326200 | 3.78539300  | -0.97300600 |
| C | -2.61750100 | 2.96907700  | -0.56257200 |
| C | -3.24331100 | 1.89863500  | -1.51677900 |
| C | -4.06584500 | 0.60286700  | -0.89489300 |
| C | -3.57340600 | -0.62638600 | -1.80360200 |
| C | -3.41333500 | -2.06731600 | -1.17820500 |
| C | -2.08036600 | -2.88243000 | -1.68548900 |
| C | -1.21651200 | -2.83855000 | -0.47894500 |
| C | 0.15081400  | -3.01772200 | -0.44883300 |
| C | 0.84554000  | -2.79958900 | 0.71865400  |
| C | 2.31391200  | -2.89239400 | 0.55498900  |
| C | 3.06079400  | -1.89837600 | 1.51579600  |
| C | 3.58785300  | -0.54960800 | 0.85954700  |
| C | 2.01587500  | 0.08072800  | 2.53949600  |
| C | 2.18993700  | -1.38373200 | 2.81465000  |
| C | 0.82162700  | -2.06282100 | 3.13764400  |
| C | 0.17666300  | -2.45885600 | 1.86746700  |
| C | -1.19238400 | -2.29522200 | 1.84867500  |
| C | -1.88283900 | -2.44965000 | 0.66390600  |
| C | -3.32281200 | -2.16902000 | 0.42549400  |
| C | -3.83313300 | -1.01601100 | 1.35902800  |
| C | -3.95474200 | 0.42769100  | 0.67357200  |
| C | -2.77783300 | 1.15117100  | 1.21777200  |
| C | -2.19386800 | 2.27626700  | 0.67951100  |
| C | -1.01004400 | 2.75005500  | 1.20403400  |
| C | -0.42095300 | 2.11275800  | 2.27136300  |
| C | 0.93619400  | 2.37897500  | 2.81540200  |
| C | 1.26637200  | 0.96967900  | 3.48162100  |
| C | -0.15264600 | 0.35226900  | 3.85574100  |
| C | -0.34792800 | -1.21364500 | 3.86354800  |
| C | -1.74136800 | -1.73762000 | 3.10947600  |
| C | -2.87807900 | -0.73884500 | 2.69753500  |
| C | -2.21285900 | 0.53339300  | 2.31711700  |
| C | -1.02277800 | 1.00290900  | 2.83479400  |
| C | 2.54995100  | 1.89502100  | -0.40031800 |
| C | 1.57431600  | 2.74102200  | -0.74124600 |
| C | 1.09107000  | 2.99039600  | -2.13232000 |
| C | -0.47720800 | 3.20484300  | -2.22729900 |
| C | -0.94414400 | 1.83757000  | -2.62396000 |
| C | -2.14403400 | 1.23723900  | -2.27094400 |
| C | -2.31164000 | -0.12623600 | -2.43096700 |
| C | -1.30466000 | -0.89570800 | -2.99841600 |
| C | -1.22869900 | -2.38775400 | -2.89718000 |
| C | 0.41183200  | -2.65432300 | -2.88309000 |

|   |             |             |             |
|---|-------------|-------------|-------------|
| C | 1.03658700  | -3.30042700 | -1.60267400 |
| C | 2.47876500  | -2.81851000 | -1.03301100 |
| C | 2.92985100  | -1.45105000 | -1.59928000 |
| C | 3.75588500  | -0.44386700 | -0.72768500 |
| C | 3.33537900  | 1.00505700  | -1.31952600 |
| C | 2.47690800  | 0.69726200  | -2.55983800 |
| C | 1.40940800  | 1.75799500  | -3.06392700 |
| C | 0.07451300  | 1.07736400  | -3.16714600 |
| C | -0.09930400 | -0.29376500 | -3.34769900 |
| C | 1.00699600  | -1.23869300 | -3.09792600 |
| C | 1.89466500  | -0.64692300 | -2.18900900 |
| F | 4.16877200  | 2.33679700  | 1.26107900  |
| F | 2.62354700  | 3.95082300  | 2.27528700  |
| F | 1.70991500  | 4.87692800  | 0.18537700  |
| F | -0.65552200 | 5.05549900  | 1.00249800  |
| F | -1.59982400 | 5.05859600  | -1.27667600 |
| F | -3.57597100 | 3.91482200  | -0.28860100 |
| F | -4.10373200 | 2.53896700  | -2.37520800 |
| F | -5.38390300 | 0.78958800  | -1.16665100 |
| F | -4.50789000 | -0.75630400 | -2.81258100 |
| F | -4.50461400 | -2.78204900 | -1.55680300 |
| F | -2.47543900 | -4.17346900 | -1.94531900 |
| F | 2.70668800  | -4.16419400 | 0.92567900  |
| F | 4.14605300  | -2.56501300 | 1.99373900  |
| F | 4.85905800  | -0.34977000 | 1.36129000  |
| F | 2.99075500  | -1.53200800 | 3.92189900  |
| F | 1.07152500  | -3.17087800 | 3.91518500  |
| F | -4.03653700 | -3.29691500 | 0.78051800  |
| F | -5.06830400 | -1.36685600 | 1.79776400  |
| F | -5.09052100 | 1.00928200  | 1.20237800  |
| F | 0.86388500  | 3.30641200  | 3.83006500  |
| F | 2.01171300  | 1.13434600  | 4.61875200  |
| F | -0.48542600 | 0.81129200  | 5.11079400  |
| F | -0.40637000 | -1.61280300 | 5.15709400  |
| F | -2.27774800 | -2.71573800 | 3.90717700  |
| F | -3.72567100 | -0.57068600 | 3.76201600  |
| F | 1.72466600  | 4.11623700  | -2.59774700 |
| F | -0.70272200 | 4.07181200  | -3.27491300 |
| F | -1.71964000 | -2.97603500 | -4.03436500 |
| F | 0.66871600  | -3.48316400 | -3.92928000 |
| F | 1.12545600  | -4.65848400 | -1.81291900 |
| F | 3.42319700  | -3.77259900 | -1.37344200 |
| F | 5.08377900  | -0.63521000 | -0.97778700 |
| F | 4.48863200  | 1.67678000  | -1.64440700 |

|    |             |             |             |
|----|-------------|-------------|-------------|
| F  | 3.37322500  | 0.56953900  | -3.62453200 |
| F  | 1.81142200  | 2.25245600  | -4.27867500 |
| F  | 2.09706600  | -1.59044500 | -4.46489200 |
| H  | 4.21365700  | -2.75409100 | -2.72363700 |
| O  | 3.85085400  | -1.85491500 | -2.85903100 |
| H  | 3.12260900  | -1.78443800 | -3.73761500 |
| PC |             |             |             |
| C  | 2.93519400  | -1.24542400 | -0.15022800 |
| C  | 3.05395000  | -1.41359100 | 1.32117000  |
| C  | 2.19945100  | -2.55909000 | 1.98014700  |
| C  | 1.34263200  | -1.76658800 | 3.12638900  |
| C  | -0.17491400 | -2.07533700 | 3.27515100  |
| C  | -1.17903000 | -0.92527000 | 3.81172800  |
| C  | -2.53009300 | -1.11603800 | 2.87357300  |
| C  | -3.31461200 | 0.11556100  | 2.30769700  |
| C  | -4.10470200 | 0.01217400  | 0.85148000  |
| C  | -3.77749000 | 1.41696200  | 0.14277300  |
| C  | -3.58468500 | 1.50352800  | -1.42628400 |
| C  | -2.35081700 | 2.47872000  | -1.92518500 |
| C  | -1.34321500 | 1.48904700  | -2.38553000 |
| C  | 0.01373600  | 1.71065200  | -2.52736600 |
| C  | 0.85051100  | 0.65629500  | -2.80819700 |
| C  | 2.28422800  | 1.02441900  | -2.81490600 |
| C  | 3.17356100  | -0.17223500 | -2.32343000 |
| C  | 3.66736100  | -0.10717900 | -0.81797200 |
| C  | 2.33313700  | -2.07174900 | -0.99852000 |
| C  | 2.48517900  | -1.66523900 | -2.43550300 |
| C  | 1.13857800  | -1.82728700 | -3.20415000 |
| C  | 0.33502500  | -0.60050200 | -3.01351400 |
| C  | -1.01882200 | -0.82471100 | -2.88787400 |
| C  | -1.85270600 | 0.21629900  | -2.53392600 |
| C  | -3.29992300 | 0.12613900  | -2.20633900 |
| C  | -3.65084400 | -1.26924800 | -1.57745000 |
| C  | -3.80407900 | -1.29679200 | 0.01846600  |
| C  | -2.54221000 | -1.94375700 | 0.46052800  |
| C  | -1.98592600 | -1.87437800 | 1.71924000  |
| C  | -0.72921300 | -2.39741600 | 1.94029600  |
| C  | -0.03943800 | -3.00158500 | 0.91453400  |
| C  | 1.38279300  | -3.43052800 | 0.94394700  |
| C  | 1.73489700  | -3.38698800 | -0.61085100 |
| C  | 0.34839400  | -3.62993900 | -1.35299800 |
| C  | 0.09766500  | -2.98738200 | -2.77278000 |
| C  | -1.39287000 | -2.26001200 | -2.94360800 |
| C  | -2.53247700 | -2.46446700 | -1.88587600 |



|   |             |             |             |
|---|-------------|-------------|-------------|
| C | -1.87110100 | -2.58767900 | -0.56164700 |
| C | -0.61054300 | -3.10325300 | -0.34034400 |
| C | 2.55673400  | -0.13131000 | 1.90075600  |
| C | 1.59469200  | -0.31576400 | 2.80638200  |
| C | 0.97231500  | 0.75940600  | 3.63097400  |
| C | -0.59322300 | 0.54355600  | 3.84250900  |
| C | -1.16129200 | 1.40623800  | 2.76065600  |
| C | -2.34013700 | 1.20912300  | 2.05414100  |
| C | -2.58408300 | 1.91739400  | 0.88636600  |
| C | -1.67554100 | 2.86076600  | 0.43820200  |
| C | -1.62649500 | 3.44638600  | -0.94049700 |
| C | 0.01252200  | 3.72096400  | -1.13554800 |
| C | 0.74795900  | 2.97864400  | -2.28131900 |
| C | 2.28546400  | 2.45971800  | -2.09216700 |
| C | 2.85219900  | 2.54999600  | -0.60997200 |
| C | 3.66573100  | 1.28279800  | -0.03284200 |
| C | 3.21703200  | 1.16278900  | 1.51573400  |
| C | 2.27756500  | 2.36892300  | 1.81239000  |
| C | 1.12311900  | 2.16072600  | 2.91467700  |
| C | -0.23206300 | 2.31723600  | 2.29911300  |
| C | -0.47865500 | 3.00435500  | 1.12700400  |
| C | 0.58429900  | 3.29833000  | 0.19592300  |
| C | 1.79099700  | 2.77466300  | 0.42581500  |
| F | 4.38961800  | -1.59311300 | 1.63429800  |
| F | 3.05558800  | -3.39796100 | 2.62129700  |
| F | 1.93317100  | -2.03687000 | 4.33920300  |
| F | -0.29941600 | -3.15974500 | 4.11390100  |
| F | -1.51824200 | -1.24767200 | 5.08464800  |
| F | -3.40497100 | -1.89129800 | 3.59521600  |
| F | -4.25171700 | 0.49189600  | 3.23855200  |
| F | -5.43799800 | 0.00390600  | 1.11176300  |
| F | -4.83553000 | 2.25252300  | 0.43781900  |
| F | -4.73735400 | 2.01307200  | -1.93231000 |
| F | -2.82715600 | 3.21540400  | -2.98269800 |
| F | 2.64585800  | 1.24958100  | -4.13113600 |
| F | 4.28306400  | -0.17824000 | -3.11151400 |
| F | 4.98926800  | -0.51351000 | -0.83871100 |
| F | 3.40323300  | -2.49303600 | -3.03542900 |
| F | 1.42883500  | -2.00769900 | -4.53738800 |
| F | -4.00560100 | 0.20146100  | -3.39129100 |
| F | -4.83559300 | -1.66384400 | -2.10822700 |
| F | -4.84126800 | -2.16805100 | 0.28846600  |
| F | 1.47300300  | -4.74226600 | 1.35022000  |
| F | 2.61420700  | -4.38482000 | -0.93653300 |

|    |             |             |             |
|----|-------------|-------------|-------------|
| F  | 0.18220700  | -4.99029200 | -1.48578100 |
| F  | 0.17953200  | -3.98006000 | -3.69153700 |
| F  | -1.86694300 | -2.61479600 | -4.18030700 |
| F  | -3.23781400 | -3.59534100 | -2.20796400 |
| F  | 1.59373600  | 0.77179300  | 4.85321900  |
| F  | -0.91127200 | 1.08238700  | 5.06875500  |
| F  | -2.24854500 | 4.67093200  | -0.99338600 |
| F  | 0.17748600  | 5.08217800  | -1.32448500 |
| F  | 0.71537400  | 3.77498300  | -3.40286000 |
| F  | 3.08737900  | 3.26400800  | -2.85280800 |
| F  | 4.98111600  | 1.67503000  | -0.02888600 |
| F  | 4.35015200  | 1.25308700  | 2.28911200  |
| F  | 3.07145300  | 3.39404100  | 2.27609900  |
| F  | 1.32149700  | 3.10469600  | 3.89197000  |
| F  | -0.75484300 | 5.80640700  | 1.06704300  |
| O  | 3.67103700  | 3.68651200  | -0.51646400 |
| H  | 4.48579700  | 3.53227200  | -1.02516400 |
| H  | -0.66204900 | 6.01027900  | 0.15631000  |
| IP |             |             |             |
| C  | 2.87511900  | 0.06375000  | 1.28550700  |
| C  | 2.99636000  | 1.54282600  | 1.20673200  |
| C  | 2.10002700  | 2.38663800  | 2.18749200  |
| C  | 1.28364900  | 3.38118800  | 1.17800500  |
| C  | -0.24419900 | 3.57846400  | 1.39407300  |
| C  | -1.19792100 | 3.91286000  | 0.12980800  |
| C  | -2.56126300 | 3.01910500  | 0.42006400  |
| C  | -3.29998100 | 2.25248400  | -0.72827900 |
| C  | -4.10304100 | 0.83434500  | -0.41162900 |
| C  | -3.72433300 | -0.10265100 | -1.66125000 |
| C  | -3.53816200 | -1.66388700 | -1.47160900 |
| C  | -2.27019200 | -2.32183100 | -2.29725800 |
| C  | -1.30551200 | -2.60795400 | -1.20390700 |
| C  | 0.05878600  | -2.78619600 | -1.34319000 |
| C  | 0.85047300  | -2.88092400 | -0.22230100 |
| C  | 2.29818400  | -2.94843500 | -0.52522600 |
| C  | 3.14154800  | -2.26081100 | 0.60653300  |
| C  | 3.64844700  | -0.78738000 | 0.30794900  |
| C  | 2.23373900  | -0.63261600 | 2.21747500  |
| C  | 2.39302000  | -2.11771800 | 2.06729400  |
| C  | 1.03532000  | -2.84787300 | 2.30244100  |
| C  | 0.28357300  | -2.86787300 | 1.02922200  |
| C  | -1.07699500 | -2.70485000 | 1.17347600  |
| C  | -1.86564200 | -2.53414100 | 0.05410600  |
| C  | -3.31353300 | -2.19792800 | 0.02837000  |

|   |             |             |             |
|---|-------------|-------------|-------------|
| C | -3.71677200 | -1.34217000 | 1.28115400  |
| C | -3.86027700 | 0.23527000  | 1.03085700  |
| C | -2.62235800 | 0.78142600  | 1.64349000  |
| C | -2.05517200 | 2.00997500  | 1.38415800  |
| C | -0.81881500 | 2.31635600  | 1.91218600  |
| C | -0.16164500 | 1.40906700  | 2.71083500  |
| C | 1.24218500  | 1.51193300  | 3.18692800  |
| C | 1.58565200  | -0.02741600 | 3.42192000  |
| C | 0.18544500  | -0.71777400 | 3.73107300  |
| C | -0.04831000 | -2.22597700 | 3.32919100  |
| C | -1.50928200 | -2.51774300 | 2.58070300  |
| C | -2.64953700 | -1.44207300 | 2.55626900  |
| C | -1.98497700 | -0.11591000 | 2.47897800  |
| C | -0.74481000 | 0.18969700  | 3.00045900  |
| C | 2.55518400  | 1.89669800  | -0.17468300 |
| C | 1.59173000  | 2.81991000  | -0.18576800 |
| C | 1.01850100  | 3.44955700  | -1.41030300 |
| C | -0.55339300 | 3.69431000  | -1.29808600 |
| C | -1.09392700 | 2.48224400  | -1.98908400 |
| C | -2.28470800 | 1.81769300  | -1.72402400 |
| C | -2.50807200 | 0.54699700  | -2.23327800 |
| C | -1.56293900 | -0.05772000 | -3.04501300 |
| C | -1.50021800 | -1.51668800 | -3.38769400 |
| C | 0.14956800  | -1.75459400 | -3.56246900 |
| C | 0.84571200  | -2.75693100 | -2.60433400 |
| C | 2.36209600  | -2.47906100 | -2.06023000 |
| C | 2.94155800  | -1.03345100 | -2.37602600 |
| C | 3.70860900  | -0.24914000 | -1.19321100 |
| C | 3.26494100  | 1.29769300  | -1.35580400 |
| C | 2.37662000  | 1.38396200  | -2.63157100 |
| C | 1.22155100  | 2.50483800  | -2.66135600 |
| C | -0.13124300 | 1.87260700  | -2.76779000 |
| C | -0.35662000 | 0.59815300  | -3.25356500 |
| C | 0.71057300  | -0.37051800 | -3.33399700 |
| C | 1.89769800  | -0.05056800 | -2.81398700 |
| F | 4.32538100  | 1.88315800  | 1.38515500  |
| F | 2.92558500  | 3.16122700  | 2.94004400  |
| F | 1.87005500  | 4.62281800  | 1.26319100  |
| F | -0.40834300 | 4.58771300  | 2.31582900  |
| F | -1.54137600 | 5.22186700  | 0.21707200  |
| F | -3.46239600 | 3.86057600  | 1.02591600  |
| F | -4.21450500 | 3.10525500  | -1.29626600 |
| F | -5.43347800 | 1.09281900  | -0.50187000 |
| F | -4.74584600 | 0.04653400  | -2.57773100 |

|   |             |             |             |
|---|-------------|-------------|-------------|
| F | -4.67417600 | -2.24784600 | -1.93318500 |
| F | -2.72625200 | -3.48802300 | -2.86186800 |
| F | 2.66089700  | -4.28314700 | -0.50978100 |
| F | 4.24480800  | -3.03574900 | 0.79193200  |
| F | 4.95244000  | -0.73908700 | 0.76658900  |
| F | 3.27308100  | -2.56696200 | 3.02231000  |
| F | 1.30853700  | -4.13071600 | 2.71926100  |
| F | -4.02250500 | -3.37932300 | 0.12669500  |
| F | -4.91996100 | -1.79808300 | 1.71186600  |
| F | -4.92990200 | 0.64933100  | 1.80021600  |
| F | 1.28085900  | 2.13404400  | 4.41388900  |
| F | 2.42188100  | -0.17846100 | 4.49558200  |
| F | -0.03632400 | -0.61668900 | 5.08645600  |
| F | -0.01249000 | -2.96267900 | 4.46586700  |
| F | -2.00527200 | -3.67709700 | 3.11968100  |
| F | -3.40211100 | -1.56682400 | 3.69550500  |
| F | 1.64710900  | 4.65235900  | -1.60640700 |
| F | -0.84140500 | 4.81144300  | -2.04948600 |
| F | -2.07518700 | -1.76121000 | -4.60709400 |
| F | 0.36535500  | -2.14113700 | -4.85673300 |
| F | 0.84250500  | -3.99635700 | -3.20032100 |
| F | 3.19474400  | -3.36345800 | -2.68910300 |
| F | 5.03780300  | -0.30960600 | -1.52694200 |
| F | 4.40485900  | 2.04631900  | -1.53021900 |
| F | 3.21343900  | 1.66829500  | -3.68803900 |
| F | 1.46208600  | 3.30681400  | -3.75093700 |
| O | 3.80472600  | -1.13077400 | -3.47892000 |
| H | 4.59102300  | -1.64236300 | -3.22124100 |

C<sub>1</sub>-S<sub>N</sub>2'-C52-F<sub>d</sub>

RC

|   |             |             |             |
|---|-------------|-------------|-------------|
| C | 2.60611500  | -1.67237900 | -0.81667300 |
| C | 2.78468200  | -2.24703600 | 0.54554600  |
| C | 1.75885400  | -3.35693600 | 0.98543200  |
| C | 1.15795200  | -2.77292200 | 2.39244200  |
| C | -0.37815500 | -2.83532100 | 2.63105800  |
| C | -1.08787500 | -1.71639700 | 3.55594400  |
| C | -2.51689100 | -1.41052000 | 2.77001700  |
| C | -3.06563700 | 0.04593300  | 2.62059000  |
| C | -3.96961900 | 0.48204500  | 1.29714400  |
| C | -3.40802000 | 1.93799900  | 0.92283200  |
| C | -3.33538400 | 2.42718800  | -0.57551000 |
| C | -1.97277700 | 3.28663800  | -0.95424500 |
| C | -1.22285200 | 2.30753200  | -1.78222000 |
| C | 0.13467900  | 2.32939500  | -2.02489000 |

|   |             |             |             |
|---|-------------|-------------|-------------|
| C | 0.72990600  | 1.27101400  | -2.68549300 |
| C | 2.21188700  | 1.36226600  | -2.71245400 |
| C | 2.87991400  | -0.07635900 | -2.64967000 |
| C | 3.48066400  | -0.52011600 | -1.23724500 |
| C | 1.78335400  | -2.10297200 | -1.76697500 |
| C | 1.90515100  | -1.33828500 | -3.05497300 |
| C | 0.50575500  | -1.04752300 | -3.68268400 |
| C | -0.03021600 | 0.21172100  | -3.11810200 |
| C | -1.39004900 | 0.19094900  | -2.88440800 |
| C | -1.97925400 | 1.22464900  | -2.18569900 |
| C | -3.38615900 | 1.28957900  | -1.70905500 |
| C | -3.95322900 | -0.14732400 | -1.41159100 |
| C | -3.99809500 | -0.58308900 | 0.13302500  |
| C | -2.86257200 | -1.53479300 | 0.24494900  |
| C | -2.21896300 | -1.91213400 | 1.40462100  |
| C | -1.07528400 | -2.67957800 | 1.33323400  |
| C | -0.59126400 | -3.08892500 | 0.11233800  |
| C | 0.71465900  | -3.75194600 | -0.13791500 |
| C | 0.95999200  | -3.34670800 | -1.66190500 |
| C | -0.49387800 | -3.12782700 | -2.27071400 |
| C | -0.70957000 | -2.08517200 | -3.43823800 |
| C | -2.03655700 | -1.09698400 | -3.24247000 |
| C | -3.11376200 | -1.38421800 | -2.14135100 |
| C | -2.40041400 | -1.97554900 | -0.98025800 |
| C | -1.25541300 | -2.74144400 | -1.04934600 |
| C | 2.60013200  | -1.10901700 | 1.50158900  |
| C | 1.68442000  | -1.36058400 | 2.43605300  |
| C | 1.34398900  | -0.44905700 | 3.56801300  |
| C | -0.21774200 | -0.43452700 | 3.87450900  |
| C | -0.65691100 | 0.75191700  | 3.08216600  |
| C | -1.89660200 | 0.95812900  | 2.50369800  |
| C | -2.07249600 | 1.97314700  | 1.58187000  |
| C | -1.02734100 | 2.82639400  | 1.28082100  |
| C | -1.00106400 | 3.80310100  | 0.15611100  |
| C | 0.63093400  | 3.93733000  | -0.14344800 |
| C | 1.13174800  | 3.30653500  | -1.50463700 |
| C | 2.45835100  | 2.41999800  | -1.55335500 |
| C | 2.68890300  | 1.72645400  | -0.25312000 |
| C | 3.64585000  | 0.57988000  | -0.13967600 |
| C | 3.45459700  | 0.11634100  | 1.36388300  |
| C | 2.82592600  | 1.35404400  | 2.09944800  |
| C | 1.72353600  | 1.05203800  | 3.21768800  |
| C | 0.39883400  | 1.58876700  | 2.76561500  |
| C | 0.20432700  | 2.62931200  | 1.87307300  |

|    |                                 |             |                          |
|----|---------------------------------|-------------|--------------------------|
| C  | 1.31970000                      | 3.31324400  | 1.15358500               |
| C  | 2.29253300                      | 2.18867100  | 0.93167300               |
| F  | 4.07306100                      | -2.74207700 | 0.64257800               |
| F  | 2.46639200                      | -4.47829000 | 1.28460000               |
| F  | 1.75601100                      | -3.47221000 | 3.41516500               |
| F  | -0.66433600                     | -4.06641100 | 3.17690000               |
| F  | -1.39109000                     | -2.29993600 | 4.74169300               |
| F  | -3.47617500                     | -2.17922300 | 3.38057400               |
| F  | -3.81522000                     | 0.34604100  | 3.73030200               |
| F  | -5.25194900                     | 0.64175300  | 1.71325600               |
| F  | -4.21829400                     | 2.84377500  | 1.57897100               |
| F  | -4.40443400                     | 3.23941500  | -0.77612100              |
| F  | -2.37756700                     | 4.35981500  | -1.70861100              |
| F  | 2.61377800                      | 1.93932200  | -3.89677000              |
| F  | 3.90748900                      | -0.06501100 | -3.53854300              |
| F  | 4.73721100                      | -1.03819300 | -1.46777600              |
| F  | 2.59777900                      | -2.11528100 | -3.95350900              |
| F  | 0.67544900                      | -0.92377200 | -5.04303500              |
| F  | -4.15784400                     | 1.80119000  | -2.73356900              |
| F  | -5.22673700                     | -0.18056200 | -1.87885900              |
| F  | -5.16799100                     | -1.29783200 | 0.29794700               |
| F  | 0.56554200                      | -5.11926000 | -0.09383300              |
| F  | 1.59566500                      | -4.35587300 | -2.33412600              |
| F  | -0.94034800                     | -4.34790600 | -2.72662700              |
| F  | -0.88599700                     | -2.78938700 | -4.58273500              |
| F  | -2.66113700                     | -1.02825400 | -4.46172700              |
| F  | -4.04644100                     | -2.25019600 | -2.65212700              |
| F  | 2.02468200                      | -0.86656100 | 4.68148500               |
| F  | -0.36484900                     | -0.16686000 | 5.21755700               |
| F  | -1.42976400                     | 5.03941500  | 0.57009700               |
| F  | 0.92545800                      | 5.25917400  | -0.17190000              |
| F  | 1.28715400                      | 4.33820300  | -2.40127900              |
| F  | 3.54988100                      | 3.18715900  | -1.86077100              |
| F  | 4.92913100                      | 1.08866100  | -0.26929600              |
| F  | 4.68052800                      | -0.17558200 | 1.90966500               |
| F  | 3.84809100                      | 2.04293400  | 2.71398300               |
| F  | 2.12988900                      | 1.66022200  | 4.37957500               |
| F  | 1.89102200                      | 4.30960900  | 1.91000900               |
| H  | 5.12437100                      | 3.55011200  | 0.25580500               |
| O  | 4.50838200                      | 4.15725400  | 0.69306500               |
| H  | 4.68242300                      | 4.03033600  | 1.63746900               |
| TS | imaginary vibrational frequency |             | -781.38 cm <sup>-1</sup> |
| C  | 2.74700700                      | 0.51987200  | 1.50580200               |
| C  | 2.90415600                      | 1.91083800  | 0.99722300               |

|   |             |             |             |
|---|-------------|-------------|-------------|
| C | 1.93602200  | 3.00037200  | 1.59030400  |
| C | 1.21997800  | 3.62842100  | 0.25543400  |
| C | -0.31790500 | 3.85585200  | 0.27226300  |
| C | -1.15754800 | 3.76647800  | -1.10823900 |
| C | -2.55451100 | 3.00076700  | -0.66290600 |
| C | -3.21150500 | 1.91216000  | -1.57267600 |
| C | -4.06523300 | 0.65791800  | -0.89964900 |
| C | -3.60521200 | -0.61498800 | -1.76179100 |
| C | -3.46893300 | -2.04118200 | -1.09460400 |
| C | -2.15247600 | -2.90638600 | -1.58194200 |
| C | -1.27332100 | -2.82254300 | -0.38844900 |
| C | 0.09472500  | -3.01338900 | -0.36624800 |
| C | 0.79655600  | -2.77107500 | 0.79291500  |
| C | 2.26188800  | -2.91028000 | 0.63471700  |
| C | 3.02315900  | -1.90548500 | 1.57968000  |
| C | 3.57333500  | -0.58549000 | 0.89677900  |
| C | 2.02066300  | 0.12959200  | 2.54683600  |
| C | 2.16511900  | -1.33159200 | 2.86332300  |
| C | 0.78506700  | -1.97043500 | 3.19850800  |
| C | 0.13676000  | -2.38419500 | 1.93497500  |
| C | -1.22868800 | -2.19682000 | 1.91757200  |
| C | -1.92706300 | -2.38125000 | 0.74297500  |
| C | -3.36506700 | -2.08755700 | 0.50773100  |
| C | -3.84961500 | -0.89146500 | 1.40206400  |
| C | -3.94728200 | 0.53272600  | 0.67091600  |
| C | -2.75229800 | 1.25053400  | 1.18312700  |
| C | -2.14492600 | 2.34321200  | 0.60343300  |
| C | -0.94967100 | 2.80940800  | 1.10852600  |
| C | -0.37381500 | 2.19880300  | 2.19879800  |
| C | 0.98732800  | 2.45829700  | 2.73443600  |
| C | 1.28834200  | 1.06610600  | 3.45416300  |
| C | -0.14150900 | 0.48720300  | 3.84397700  |
| C | -0.36500600 | -1.07552700 | 3.89949200  |
| C | -1.76589200 | -1.59514900 | 3.16316800  |
| C | -2.88492400 | -0.58811500 | 2.72555200  |
| C | -2.19706300 | 0.65837800  | 2.30121000  |
| C | -0.99718100 | 1.12130000  | 2.80078800  |
| C | 2.59381000  | 1.83369800  | -0.45729500 |
| C | 1.63869300  | 2.68263100  | -0.83939600 |
| C | 1.16405800  | 2.86343100  | -2.24616400 |
| C | -0.40398200 | 3.11748000  | -2.34120200 |
| C | -0.91137900 | 1.75095100  | -2.67434400 |
| C | -2.12784100 | 1.19658000  | -2.29777800 |
| C | -2.33336300 | -0.16717200 | -2.39855300 |

|   |             |             |             |
|---|-------------|-------------|-------------|
| C | -1.34652200 | -0.98468600 | -2.92794300 |
| C | -1.30187100 | -2.47474500 | -2.81308300 |
| C | 0.33550300  | -2.77857000 | -2.82797200 |
| C | 0.97123100  | -3.36250200 | -1.51480600 |
| C | 2.44254600  | -2.90422400 | -0.96631800 |
| C | 2.90896600  | -1.55509900 | -1.54484900 |
| C | 3.72225100  | -0.53262700 | -0.67890700 |
| C | 3.33633200  | 0.87598500  | -1.34233700 |
| C | 2.40340100  | 0.49949200  | -2.48573000 |
| C | 1.45088700  | 1.56094800  | -3.12607300 |
| C | 0.08090000  | 0.93793000  | -3.18918300 |
| C | -0.14318100 | -0.42573300 | -3.30532400 |
| C | 0.98034900  | -1.39995700 | -3.22537900 |
| C | 1.89577800  | -0.78352600 | -2.21216500 |
| F | 4.21947500  | 2.29739700  | 1.18945800  |
| F | 2.70306100  | 3.98083300  | 2.13660400  |
| F | 1.80946800  | 4.84755400  | 0.01142600  |
| F | -0.54987100 | 5.09827300  | 0.81889900  |
| F | -1.48303300 | 5.03447800  | -1.46386800 |
| F | -3.48311200 | 3.98421700  | -0.42120500 |
| F | -4.05967600 | 2.54074000  | -2.45150600 |
| F | -5.37937800 | 0.86874800  | -1.17188000 |
| F | -4.54320600 | -0.75832100 | -2.76612700 |
| F | -4.57807200 | -2.74467500 | -1.44073100 |
| F | -2.57795400 | -4.19833900 | -1.77911900 |
| F | 2.62246000  | -4.17704400 | 1.04954600  |
| F | 4.09576400  | -2.57853900 | 2.07744000  |
| F | 4.84950400  | -0.39370500 | 1.39185100  |
| F | 2.96343100  | -1.46315900 | 3.97418400  |
| F | 1.00807600  | -3.06294900 | 4.00575800  |
| F | -4.09365800 | -3.18907700 | 0.91231100  |
| F | -5.08971400 | -1.20319700 | 1.85641200  |
| F | -5.06693200 | 1.15364800  | 1.18966800  |
| F | 0.93428100  | 3.42266300  | 3.71498000  |
| F | 2.03529400  | 1.25747900  | 4.58573500  |
| F | -0.46823500 | 0.98999700  | 5.08367700  |
| F | -0.42775400 | -1.43238600 | 5.20533500  |
| F | -2.31866400 | -2.54098400 | 3.98844600  |
| F | -3.72304000 | -0.36883100 | 3.78845400  |
| F | 1.82586100  | 3.94013300  | -2.77915400 |
| F | -0.60857700 | 3.94952500  | -3.42073400 |
| F | -1.82638000 | -3.06829700 | -3.93392000 |
| F | 0.56044600  | -3.67463600 | -3.82535100 |
| F | 1.02714600  | -4.73172600 | -1.65232700 |



|    |             |             |             |
|----|-------------|-------------|-------------|
| F  | 3.36141300  | -3.86710200 | -1.27318400 |
| F  | 5.06811400  | -0.74869000 | -0.91920200 |
| F  | 4.49206200  | 1.50610700  | -1.73454200 |
| F  | 3.63195600  | 0.21033800  | -3.72059200 |
| F  | 1.90911100  | 1.96496700  | -4.34908100 |
| F  | 1.63572200  | -1.56729800 | -4.44593500 |
| H  | 3.91068500  | -0.97714600 | -3.33927500 |
| O  | 3.92404600  | -1.94077700 | -2.75072800 |
| H  | 4.81831800  | -2.11352200 | -2.39272200 |
| PC |             |             |             |
| C  | -2.65636700 | -1.05061300 | 1.39021600  |
| C  | -2.88020700 | -2.17670300 | 0.43817900  |
| C  | -1.88577100 | -3.39632000 | 0.53501300  |
| C  | -1.26514000 | -3.49678500 | -0.98017800 |
| C  | 0.27127200  | -3.69599100 | -1.14736000 |
| C  | 1.02921600  | -3.10808000 | -2.45170300 |
| C  | 2.46380100  | -2.54672300 | -1.85103500 |
| C  | 3.08468300  | -1.19772800 | -2.34571300 |
| C  | 4.00055900  | -0.26782100 | -1.32309300 |
| C  | 3.51216000  | 1.22956700  | -1.63767500 |
| C  | 3.44809800  | 2.31766700  | -0.49580900 |
| C  | 2.11664200  | 3.29097700  | -0.55464300 |
| C  | 1.31388000  | 2.76010500  | 0.57394200  |
| C  | -0.04852300 | 2.90318700  | 0.73642700  |
| C  | -0.68069100 | 2.25296600  | 1.76989900  |
| C  | -2.14458900 | 2.45276500  | 1.78752800  |
| C  | -2.87618400 | 1.18161700  | 2.34985500  |
| C  | -3.49872600 | 0.20045500  | 1.27380400  |
| C  | -1.85747200 | -1.05904400 | 2.45262100  |
| C  | -1.95331800 | 0.18855800  | 3.28370500  |
| C  | -0.54154400 | 0.66763100  | 3.73694600  |
| C  | 0.04026000  | 1.49952400  | 2.66273700  |
| C  | 1.39941900  | 1.34898900  | 2.50195200  |
| C  | 2.02903800  | 1.95210400  | 1.43225000  |
| C  | 3.44534100  | 1.77739500  | 1.01984500  |
| C  | 3.95840400  | 0.33897400  | 1.39057800  |
| C  | 3.98113900  | -0.72268500 | 0.19007900  |
| C  | 2.80549600  | -1.58248600 | 0.48408600  |
| C  | 2.14269200  | -2.39398200 | -0.41044500 |
| C  | 0.97091400  | -3.01614400 | -0.03355300 |
| C  | 0.47438400  | -2.84548200 | 1.23754600  |
| C  | -0.85475300 | -3.29193400 | 1.73091200  |
| C  | -1.08750600 | -2.25456000 | 2.91842200  |
| C  | 0.37518300  | -1.84845600 | 3.40106400  |

|   |             |             |             |
|---|-------------|-------------|-------------|
| C | 0.63125300  | -0.41168200 | 4.00221600  |
| C | 1.99870600  | 0.34614900  | 3.41698200  |
| C | 3.06962800  | -0.42868500 | 2.57543600  |
| C | 2.33117000  | -1.43885700 | 1.77401100  |
| C | 1.15461600  | -2.05675800 | 2.14733900  |
| C | -2.67669200 | -1.58915100 | -0.91482900 |
| C | -1.74574500 | -2.22844800 | -1.63175900 |
| C | -1.33879700 | -1.86667100 | -3.02833000 |
| C | 0.21429200  | -2.06058000 | -3.31115200 |
| C | 0.72800400  | -0.66127100 | -3.16440400 |
| C | 1.97273100  | -0.27223800 | -2.69216300 |
| C | 2.19207400  | 1.03703500  | -2.30617600 |
| C | 1.18511400  | 1.98487600  | -2.43934400 |
| C | 1.18203200  | 3.33609500  | -1.80399400 |
| C | -0.45226800 | 3.62628500  | -1.61418400 |
| C | -0.98409000 | 3.66191300  | -0.13151100 |
| C | -2.42588800 | 3.04887400  | 0.32673100  |
| C | -3.10089900 | 2.10107900  | -0.72985300 |
| C | -3.76955900 | 0.72749600  | -0.20297100 |
| C | -3.38548200 | -0.33013800 | -1.33944100 |
| C | -2.42320400 | 0.38851300  | -2.22563500 |
| C | -1.64333300 | -0.33161000 | -3.31745600 |
| C | -0.27535500 | 0.28025300  | -3.28812600 |
| C | -0.04772300 | 1.59858100  | -2.92222600 |
| C | -1.15533700 | 2.52049100  | -2.50710500 |
| C | -2.16095400 | 1.63166300  | -1.80675300 |
| F | -4.18284000 | -2.61919700 | 0.58483100  |
| F | -2.62757600 | -4.51633600 | 0.74203500  |
| F | -1.88146900 | -4.55617900 | -1.60536200 |
| F | 0.51999900  | -5.04944700 | -1.10189900 |
| F | 1.30919400  | -4.15864500 | -3.26261000 |
| F | 3.38974600  | -3.54360100 | -2.04094700 |
| F | 3.86187000  | -1.46043100 | -3.44684100 |
| F | 5.29105100  | -0.35929100 | -1.73667100 |
| F | 4.38668700  | 1.72730100  | -2.58402000 |
| F | 4.54479500  | 3.10534100  | -0.63596300 |
| F | 2.54707600  | 4.56820600  | -0.28899600 |
| F | -2.41290600 | 3.47049700  | 2.68525000  |
| F | -3.89949500 | 1.63333800  | 3.12466200  |
| F | -4.73766800 | -0.16717500 | 1.76540800  |
| F | -2.67762200 | -0.09254000 | 4.41716300  |
| F | -0.69179100 | 1.40599500  | 4.88874200  |
| F | 4.21739000  | 2.66056200  | 1.74776500  |
| F | 5.22958400  | 0.46854100  | 1.84641800  |

|    |             |             |             |
|----|-------------|-------------|-------------|
| F  | 5.11741800  | -1.48584400 | 0.37391300  |
| F  | -0.75236300 | -4.54374500 | 2.29393000  |
| F  | -1.76775500 | -2.84334700 | 3.95052600  |
| F  | 0.76718700  | -2.76429800 | 4.35148500  |
| F  | 0.77637500  | -0.54714300 | 5.34231300  |
| F  | 2.61508700  | 0.93458500  | 4.49067100  |
| F  | 3.96778600  | -1.01451300 | 3.42930800  |
| F  | -2.05382800 | -2.65611900 | -3.89265300 |
| F  | 0.33396700  | -2.44116800 | -4.63028100 |
| F  | 1.65313800  | 4.28996200  | -2.66924400 |
| F  | -0.70654300 | 4.83979200  | -2.16735500 |
| F  | -0.98424300 | 4.98363400  | 0.25865900  |
| F  | -3.28881300 | 4.10475500  | 0.51253900  |
| F  | -5.12105100 | 0.92499700  | -0.27229600 |
| F  | -4.55592400 | -0.71065100 | -2.00502700 |
| F  | -2.27443300 | -0.22254900 | -4.53094800 |
| F  | -1.76847900 | 3.13884400  | -3.57461600 |
| O  | -4.06373000 | 2.83563300  | -1.43835400 |
| H  | -4.53374100 | 3.41798100  | -0.81605400 |
| F  | -4.60446800 | 1.17483700  | -3.91375300 |
| H  | -5.04466200 | 0.64131200  | -3.28254800 |
| IP |             |             |             |
| C  | 3.00105800  | 0.64463400  | 0.91782100  |
| C  | 3.09092900  | 1.97495800  | 0.24814900  |
| C  | 2.21534400  | 3.13632600  | 0.85619000  |
| C  | 1.29900700  | 3.62190900  | -0.41463400 |
| C  | -0.22343400 | 3.86568100  | -0.18851000 |
| C  | -1.27276800 | 3.63247300  | -1.39920600 |
| C  | -2.58147700 | 2.94703900  | -0.65682900 |
| C  | -3.37436900 | 1.77191400  | -1.31963700 |
| C  | -4.11118500 | 0.61968200  | -0.38197400 |
| C  | -3.79265100 | -0.75259700 | -1.15320000 |
| C  | -3.55782500 | -2.09456500 | -0.35601500 |
| C  | -2.33088800 | -3.03061300 | -0.94170900 |
| C  | -1.27810300 | -2.80931200 | 0.07943100  |
| C  | 0.07663400  | -3.00019200 | -0.09909800 |
| C  | 0.95002600  | -2.63947500 | 0.89978300  |
| C  | 2.37024800  | -2.84376300 | 0.54642900  |
| C  | 3.27962100  | -1.75937300 | 1.22943300  |
| C  | 3.72110200  | -0.54223700 | 0.31649300  |
| C  | 2.44464800  | 0.38927300  | 2.09792700  |
| C  | 2.63562500  | -1.02831700 | 2.55603200  |
| C  | 1.32398600  | -1.59795200 | 3.17560900  |
| C  | 0.47967700  | -2.13050900 | 2.08504800  |

|   |             |             |             |
|---|-------------|-------------|-------------|
| C | -0.87123800 | -1.93402200 | 2.26669200  |
| C | -1.74677300 | -2.24126100 | 1.24512300  |
| C | -3.20428000 | -1.95632400 | 1.20697800  |
| C | -3.53849400 | -0.65485600 | 2.02219700  |
| C | -3.74680600 | 0.67637900  | 1.15417300  |
| C | -2.48483900 | 1.42511800  | 1.38603200  |
| C | -1.97540500 | 2.43179700  | 0.59567100  |
| C | -0.71484100 | 2.93068200  | 0.84901600  |
| C | 0.02542300  | 2.44051000  | 1.89922400  |
| C | 1.45334800  | 2.73915200  | 2.18461800  |
| C | 1.86545900  | 1.43276300  | 2.99995200  |
| C | 0.51403300  | 0.92764900  | 3.67550700  |
| C | 0.30138300  | -0.61317900 | 3.94631800  |
| C | -1.20210200 | -1.18872300 | 3.50668000  |
| C | -2.37583600 | -0.21848000 | 3.13572600  |
| C | -1.76121700 | 0.95736700  | 2.46633500  |
| C | -0.49682200 | 1.45241900  | 2.71387600  |
| C | 2.57498800  | 1.75116100  | -1.13027800 |
| C | 1.55487500  | 2.55733700  | -1.44674900 |
| C | 0.84149500  | 2.56291200  | -2.76552600 |
| C | -0.72234000 | 2.83170500  | -2.64599900 |
| C | -1.27986400 | 1.44449700  | -2.74055100 |
| C | -2.41864000 | 0.95674900  | -2.11670200 |
| C | -2.63221100 | -0.40592900 | -2.02481000 |
| C | -1.73629600 | -1.29594100 | -2.60358100 |
| C | -1.68334900 | -2.76385300 | -2.33635400 |
| C | -0.06764400 | -3.10352500 | -2.58583600 |
| C | 0.76118100  | -3.51816400 | -1.31081400 |
| C | 2.30196500  | -3.05002900 | -1.04158900 |
| C | 2.79623500  | -1.86911600 | -1.95306400 |
| C | 3.64719800  | -0.67985400 | -1.26744800 |
| C | 3.10457900  | 0.63781400  | -1.99998400 |
| C | 1.92366000  | 0.17102500  | -2.78724200 |
| C | 0.98245900  | 1.14636000  | -3.47475100 |
| C | -0.38578900 | 0.55856900  | -3.31033700 |
| C | -0.61237200 | -0.80829700 | -3.23701600 |
| C | 0.49852400  | -1.81207300 | -3.30992000 |
| C | 1.68184300  | -1.13714800 | -2.64995600 |
| F | 4.41985900  | 2.35737700  | 0.21456500  |
| F | 3.05104400  | 4.16266600  | 1.16591600  |
| F | 1.83254800  | 4.80315300  | -0.87686100 |
| F | -0.37499500 | 5.16510900  | 0.24154100  |
| F | -1.65141100 | 4.85592400  | -1.84591500 |
| F | -3.46313100 | 3.96586200  | -0.38922700 |

|   |             |             |             |
|---|-------------|-------------|-------------|
| F | -4.34747400 | 2.30868200  | -2.12623300 |
| F | -5.45161400 | 0.82112100  | -0.46855100 |
| F | -4.87438100 | -0.98819900 | -1.97919200 |
| F | -4.70612900 | -2.81358300 | -0.44335700 |
| F | -2.77490400 | -4.33019900 | -0.91147700 |
| F | 2.75952700  | -4.05760800 | 1.08360700  |
| F | 4.41284000  | -2.39929900 | 1.62714200  |
| F | 5.05515600  | -0.31805600 | 0.60290100  |
| F | 3.59660600  | -1.04741900 | 3.53826400  |
| F | 1.66816700  | -2.60335400 | 4.05035200  |
| F | -3.86106200 | -2.98925700 | 1.84564600  |
| F | -4.69179700 | -0.88711700 | 2.69795800  |
| F | -4.77003900 | 1.37639800  | 1.76322300  |
| F | 1.54726100  | 3.80798800  | 3.04688700  |
| F | 2.78099100  | 1.73630100  | 3.97182000  |
| F | 0.38794600  | 1.57536500  | 4.88372100  |
| F | 0.44921200  | -0.81951000 | 5.27731600  |
| F | -1.61625700 | -2.02414800 | 4.51175100  |
| F | -3.03797400 | 0.13691200  | 4.28209700  |
| F | 1.40357100  | 3.53709300  | -3.55031400 |
| F | -1.09271800 | 3.53420200  | -3.77260400 |
| F | -2.38343700 | -3.46357600 | -3.28600300 |
| F | -0.01009600 | -4.13768200 | -3.46362900 |
| F | 0.76197300  | -4.89577800 | -1.27134300 |
| F | 3.11882000  | -4.12215900 | -1.31545900 |
| F | 4.93788900  | -0.87109100 | -1.67188400 |
| F | 4.10354600  | 1.15314600  | -2.80192500 |
| F | 1.35802500  | 1.33026100  | -4.78659700 |
| F | 0.83920000  | -2.14332100 | -4.60578500 |
| O | 3.53251700  | -2.41069900 | -3.01892200 |
| H | 4.12883200  | -3.09731600 | -2.67263900 |

C<sub>1</sub>-S<sub>N</sub>2'-C40-F<sub>g</sub>

RC

|   |             |             |             |
|---|-------------|-------------|-------------|
| C | -2.75983400 | -1.15714400 | -1.00375600 |
| C | -3.37598600 | 0.19560800  | -1.09945000 |
| C | -2.86690300 | 1.12131600  | -2.26511600 |
| C | -2.38527500 | 2.47534300  | -1.48588800 |
| C | -1.02606600 | 3.12107200  | -1.88181700 |
| C | -0.18261600 | 3.94114200  | -0.77531300 |
| C | 1.38966100  | 3.51876600  | -1.09418500 |
| C | 2.39810500  | 3.21234200  | 0.06010100  |
| C | 3.62716100  | 2.11653600  | -0.15409100 |
| C | 3.64900100  | 1.30354100  | 1.22894100  |
| C | 4.02388900  | -0.22822500 | 1.27045100  |

|   |             |             |             |
|---|-------------|-------------|-------------|
| C | 3.11165100  | -1.13092800 | 2.31300500  |
| C | 2.25632400  | -1.90011900 | 1.37270900  |
| C | 1.05096300  | -2.49484100 | 1.68059600  |
| C | 0.28025000  | -3.04827300 | 0.67571300  |
| C | -1.05910900 | -3.48822400 | 1.14525900  |
| C | -2.15492500 | -3.29740400 | 0.01288500  |
| C | -3.12023900 | -2.03523000 | 0.16530400  |
| C | -1.95814900 | -1.73844100 | -1.88957500 |
| C | -1.58318900 | -3.14643500 | -1.52259500 |
| C | -0.07475200 | -3.42767800 | -1.80482900 |
| C | 0.72357900  | -3.02504200 | -0.62446300 |
| C | 1.93281900  | -2.43727100 | -0.93569100 |
| C | 2.68209400  | -1.84505800 | 0.06036900  |
| C | 3.91706400  | -1.03595100 | -0.11488100 |
| C | 3.92134800  | -0.29790600 | -1.50351500 |
| C | 3.52999000  | 1.25887100  | -1.47561600 |
| C | 2.14836100  | 1.26497000  | -2.02200400 |
| C | 1.21022700  | 2.26339100  | -1.86685600 |
| C | -0.08504900 | 2.05453300  | -2.29029500 |
| C | -0.43665000 | 0.86814500  | -2.89032000 |
| C | -1.81561900 | 0.42873200  | -3.22728500 |
| C | -1.62280400 | -1.15545200 | -3.22423000 |
| C | -0.08979600 | -1.38727000 | -3.58283200 |
| C | 0.66900200  | -2.65049400 | -3.01170500 |
| C | 2.18244300  | -2.32513300 | -2.39519500 |
| C | 2.88087000  | -0.94201500 | -2.63073600 |
| C | 1.80855500  | 0.08578200  | -2.65718600 |
| C | 0.51132400  | -0.12032400 | -3.07911400 |
| C | -3.02616500 | 0.90184900  | 0.17332300  |
| C | -2.42390900 | 2.07187400  | -0.03471300 |
| C | -2.03156200 | 3.03477500  | 1.03599400  |
| C | -0.63488500 | 3.73402000  | 0.72580100  |
| C | 0.30665800  | 2.85454500  | 1.47980000  |
| C | 1.63176000  | 2.59638500  | 1.17656200  |
| C | 2.29864300  | 1.56033800  | 1.80321900  |
| C | 1.66370300  | 0.81873000  | 2.78172100  |
| C | 2.16907500  | -0.45660300 | 3.36282200  |
| C | 0.75890000  | -1.20269400 | 3.82609500  |
| C | 0.34800200  | -2.48019300 | 2.99167400  |
| C | -1.16202700 | -2.69371300 | 2.51819500  |
| C | -1.85999500 | -1.38900600 | 2.32113600  |
| C | -3.13690200 | -1.28913100 | 1.53865200  |
| C | -3.39416800 | 0.27917600  | 1.48943900  |
| C | -2.54365000 | 0.87395900  | 2.67067400  |

|   |             |             |             |
|---|-------------|-------------|-------------|
| C | -1.83160900 | 2.28374100  | 2.42028200  |
| C | -0.34200800 | 2.09937700  | 2.44162700  |
| C | 0.34655500  | 1.09192400  | 3.09791800  |
| C | -0.32989200 | -0.03645600 | 3.80271800  |
| C | -1.55328600 | -0.26034700 | 2.95911400  |
| F | -4.74866600 | 0.02300200  | -1.20958700 |
| F | -3.94609600 | 1.45706100  | -3.02640700 |
| F | -3.34921300 | 3.43931700  | -1.69822900 |
| F | -1.25826300 | 3.97086100  | -2.94066900 |
| F | -0.31629200 | 5.26058400  | -1.05749300 |
| F | 1.91527300  | 4.51283800  | -1.88170300 |
| F | 2.98145500  | 4.39006100  | 0.45487600  |
| F | 4.78950700  | 2.81452800  | -0.22617600 |
| F | 4.57064100  | 1.94161400  | 2.03593000  |
| F | 5.31605500  | -0.30648300 | 1.67969000  |
| F | 3.97661200  | -1.96199000 | 2.98103000  |
| F | -1.02083600 | -4.83187200 | 1.44506800  |
| F | -2.93537400 | -4.40921800 | 0.04010000  |
| F | -4.40818700 | -2.47576000 | -0.05586200 |
| F | -2.30921100 | -4.00609500 | -2.31324000 |
| F | 0.06460200  | -4.77759200 | -2.03495600 |
| F | 4.99148900  | -1.90307600 | -0.13850400 |
| F | 5.17952100  | -0.39071300 | -2.00286900 |
| F | 4.35293200  | 1.87906000  | -2.39459100 |
| F | -2.13070200 | 0.80389000  | -4.51347400 |
| F | -2.41451300 | -1.74109200 | -4.17563900 |
| F | 0.01315400  | -1.43524100 | -4.95503600 |
| F | 0.82221700  | -3.52706100 | -4.03402800 |
| F | 3.01289500  | -3.32042000 | -2.84321700 |
| F | 3.56318000  | -0.98881100 | -3.81949400 |
| F | -3.00111900 | 3.99182100  | 1.14392600  |
| F | -0.66285300 | 4.97873800  | 1.31488800  |
| F | 2.88801500  | -0.22386800 | 4.50847100  |
| F | 0.91360900  | -1.59315000 | 5.11676100  |
| F | 0.70919100  | -3.58479400 | 3.72953100  |
| F | -1.85262100 | -3.43783200 | 3.43747700  |
| F | -4.13537700 | -1.86495700 | 2.29462700  |
| F | -4.72646600 | 0.51124700  | 1.71174800  |
| F | -3.36617100 | 1.01653900  | 3.75783800  |
| F | -2.23212400 | 3.13551100  | 3.41835100  |
| F | -0.70146100 | 0.27608300  | 5.09250400  |
| H | -5.52070700 | 2.96498400  | -0.98727400 |
| O | -5.57818800 | 2.59751300  | -0.09300600 |
| H | -6.12276600 | 1.80364500  | -0.19657100 |

| TS | imaginary vibrational frequency |             |             | -705.98 cm <sup>-1</sup> |
|----|---------------------------------|-------------|-------------|--------------------------|
| C  | -2.78991600                     | -0.93811600 | -0.97537900 |                          |
| C  | -3.39842600                     | 0.40175100  | -1.19031900 |                          |
| C  | -2.72534000                     | 1.25360700  | -2.33045100 |                          |
| C  | -2.05526700                     | 2.41663700  | -1.49003800 |                          |
| C  | -0.80061500                     | 3.13231600  | -1.98627800 |                          |
| C  | 0.10487600                      | 3.91574100  | -0.90367000 |                          |
| C  | 1.64461300                      | 3.38533700  | -1.19255300 |                          |
| C  | 2.61454400                      | 3.04222200  | -0.01123500 |                          |
| C  | 3.76248700                      | 1.85863500  | -0.17251200 |                          |
| C  | 3.71589000                      | 1.09205100  | 1.23829000  |                          |
| C  | 3.97539600                      | -0.46020700 | 1.33411400  |                          |
| C  | 2.98672600                      | -1.26082200 | 2.39135300  |                          |
| C  | 2.09027200                      | -1.99768300 | 1.46372800  |                          |
| C  | 0.84207000                      | -2.49675000 | 1.77191900  |                          |
| C  | 0.04724400                      | -3.02692500 | 0.77338600  |                          |
| C  | -1.32901200                     | -3.34582300 | 1.23510000  |                          |
| C  | -2.38986400                     | -3.10564500 | 0.08243100  |                          |
| C  | -3.25315100                     | -1.76923200 | 0.18265700  |                          |
| C  | -2.03448700                     | -1.60795300 | -1.84183100 |                          |
| C  | -1.78571300                     | -3.03514300 | -1.44129700 |                          |
| C  | -0.30446200                     | -3.44844600 | -1.69950100 |                          |
| C  | 0.50857400                      | -3.07618300 | -0.52010400 |                          |
| C  | 1.75891500                      | -2.58250700 | -0.83137000 |                          |
| C  | 2.53545900                      | -2.01419300 | 0.15682300  |                          |
| C  | 3.82634300                      | -1.30047200 | -0.02721300 |                          |
| C  | 3.89935600                      | -0.60872200 | -1.43875800 |                          |
| C  | 3.62087000                      | 0.97114500  | -1.46891100 |                          |
| C  | 2.25620500                      | 1.06438600  | -2.05251800 |                          |
| C  | 1.39458600                      | 2.13930700  | -1.96149500 |                          |
| C  | 0.09980500                      | 2.02297100  | -2.42615900 |                          |
| C  | -0.32407000                     | 0.83735500  | -2.99003200 |                          |
| C  | -1.73347100                     | 0.46131400  | -3.28547200 |                          |
| C  | -1.65060600                     | -1.11906800 | -3.20086200 |                          |
| C  | -0.14311200                     | -1.47667700 | -3.54775500 |                          |
| C  | 0.51449100                      | -2.76806300 | -2.91879500 |                          |
| C  | 2.03471500                      | -2.53304300 | -2.28920000 |                          |
| C  | 2.83453000                      | -1.21393300 | -2.56174100 |                          |
| C  | 1.84568000                      | -0.10896000 | -2.65512200 |                          |
| C  | 0.54803100                      | -0.23002200 | -3.10885000 |                          |
| C  | -3.30178500                     | 1.26931300  | 0.07900300  |                          |
| C  | -2.10246900                     | 2.06593000  | -0.12945100 |                          |
| C  | -1.78210800                     | 3.11855700  | 0.86948000  |                          |
| C  | -0.38095900                     | 3.78130000  | 0.59142800  |                          |



|   |             |             |             |
|---|-------------|-------------|-------------|
| C | 0.50204700  | 2.89641700  | 1.40750000  |
| C | 1.80251000  | 2.52884700  | 1.12459600  |
| C | 2.38605900  | 1.46775700  | 1.79395500  |
| C | 1.68756300  | 0.80648800  | 2.78654600  |
| C | 2.08297800  | -0.48789900 | 3.40706800  |
| C | 0.61103800  | -1.11178100 | 3.86542700  |
| C | 0.11973900  | -2.38147600 | 3.06769500  |
| C | -1.39434000 | -2.49573400 | 2.57372800  |
| C | -1.99046100 | -1.15040700 | 2.31534100  |
| C | -3.25523400 | -1.00102300 | 1.52623400  |
| C | -3.49878500 | 0.58803400  | 1.46672800  |
| C | -2.51769300 | 1.16341500  | 2.59479000  |
| C | -1.68730600 | 2.49162200  | 2.30057200  |
| C | -0.21228100 | 2.21963400  | 2.38428300  |
| C | 0.38921200  | 1.18598700  | 3.07572300  |
| C | -0.38897800 | 0.12950200  | 3.78328900  |
| C | -1.61124300 | -0.02713900 | 2.91600800  |
| F | -4.74301100 | 0.19096500  | -1.51124100 |
| F | -3.72903200 | 1.71982900  | -3.12891700 |
| F | -3.31020700 | 3.60974000  | -1.66704100 |
| F | -1.09186900 | 3.98144300  | -3.02304300 |
| F | 0.06557200  | 5.23260000  | -1.22807600 |
| F | 2.25059300  | 4.33128000  | -1.98426500 |
| F | 3.27842300  | 4.19060000  | 0.34533800  |
| F | 4.97260400  | 2.47070900  | -0.25148000 |
| F | 4.67974200  | 1.68706200  | 2.02912800  |
| F | 5.25329800  | -0.62140400 | 1.76447500  |
| F | 3.78096600  | -2.13184900 | 3.09613700  |
| F | -1.40328300 | -4.67710300 | 1.57949600  |
| F | -3.25579000 | -4.15153900 | 0.12474300  |
| F | -4.56846100 | -2.10652400 | -0.07817400 |
| F | -2.57614700 | -3.84020900 | -2.22838500 |
| F | -0.27720400 | -4.81090500 | -1.89128400 |
| F | 4.83493800  | -2.24391700 | -0.01040800 |
| F | 5.15559500  | -0.80655900 | -1.91364800 |
| F | 4.50471300  | 1.49819600  | -2.39065000 |
| F | -2.05690000 | 0.78856500  | -4.58115800 |
| F | -2.48911900 | -1.69666000 | -4.11814100 |
| F | -0.05500500 | -1.59850900 | -4.91678300 |
| F | 0.61782600  | -3.69057300 | -3.90681400 |
| F | 2.79767200  | -3.60055400 | -2.69114800 |
| F | 3.53301400  | -1.36016400 | -3.73383500 |
| F | -2.74918300 | 4.11598800  | 0.89269600  |
| F | -0.38547300 | 5.04775300  | 1.13593200  |

|    |             |             |             |
|----|-------------|-------------|-------------|
| F  | 2.80029000  | -0.28439000 | 4.55971200  |
| F  | 0.71380700  | -1.46839800 | 5.17148400  |
| F  | 0.38000300  | -3.48492500 | 3.84899600  |
| F  | -2.15424500 | -3.15076100 | 3.50650400  |
| F  | -4.27187100 | -1.54469300 | 2.28620900  |
| F  | -4.79179000 | 0.79791100  | 1.86037300  |
| F  | -3.28965900 | 1.40733800  | 3.70448100  |
| F  | -2.06182100 | 3.43240000  | 3.22932000  |
| F  | -0.77145300 | 0.49702500  | 5.05609600  |
| H  | -4.10418000 | 3.03094400  | -0.83068400 |
| O  | -4.51271100 | 2.30182300  | -0.07888600 |
| H  | -5.29195700 | 1.82136400  | -0.42984000 |
| PC |             |             |             |
| C  | -2.70133900 | -1.01814800 | -1.13292400 |
| C  | -3.39058800 | 0.29152300  | -1.34997200 |
| C  | -2.62397400 | 1.21214500  | -2.35735700 |
| C  | -1.95567000 | 2.21715000  | -1.41632700 |
| C  | -0.82570800 | 3.08770400  | -1.88379700 |
| C  | -0.02337200 | 3.91007000  | -0.77939800 |
| C  | 1.55934100  | 3.46683700  | -1.01479600 |
| C  | 2.46983600  | 3.10987600  | 0.20092300  |
| C  | 3.67681100  | 1.98709300  | 0.05744900  |
| C  | 3.58781300  | 1.16814200  | 1.43414100  |
| C  | 3.91795800  | -0.37124900 | 1.49189500  |
| C  | 2.91780100  | -1.25156900 | 2.47382100  |
| C  | 2.09879700  | -1.98967300 | 1.47859000  |
| C  | 0.85984800  | -2.54967200 | 1.70943100  |
| C  | 0.13465200  | -3.07370800 | 0.65611200  |
| C  | -1.24609800 | -3.46833900 | 1.03971700  |
| C  | -2.26241200 | -3.22204500 | -0.15275000 |
| C  | -3.18401300 | -1.92763300 | -0.04273400 |
| C  | -1.87098000 | -1.62259300 | -1.98219700 |
| C  | -1.59099600 | -3.05892500 | -1.63702000 |
| C  | -0.08761500 | -3.41181800 | -1.84382600 |
| C  | 0.65614200  | -3.05437100 | -0.61509500 |
| C  | 1.89661700  | -2.49752500 | -0.84931200 |
| C  | 2.60311300  | -1.93764100 | 0.19434800  |
| C  | 3.87040000  | -1.16780600 | 0.09763100  |
| C  | 3.98227500  | -0.42555900 | -1.28624400 |
| C  | 3.64771800  | 1.14366000  | -1.27841900 |
| C  | 2.31970200  | 1.21221800  | -1.94539200 |
| C  | 1.41715200  | 2.25450300  | -1.86649500 |
| C  | 0.15811300  | 2.10358800  | -2.40979800 |
| C  | -0.20535100 | 0.92505400  | -3.03661600 |

|   |             |             |             |
|---|-------------|-------------|-------------|
| C | -1.60491800 | 0.49496500  | -3.35408100 |
| C | -1.45262400 | -1.07940500 | -3.31041800 |
| C | 0.07846300  | -1.37153100 | -3.61782000 |
| C | 0.75996000  | -2.65623800 | -2.99845500 |
| C | 2.23670600  | -2.38499500 | -2.28953700 |
| C | 2.99817100  | -1.03003200 | -2.48248000 |
| C | 1.97921100  | 0.04581900  | -2.60504000 |
| C | 0.71075900  | -0.10765400 | -3.13499500 |
| C | -3.55526200 | 1.14847200  | -0.03567300 |
| C | -2.40599100 | 2.12881000  | -0.16555400 |
| C | -2.03273600 | 3.07323900  | 0.92939400  |
| C | -0.59096000 | 3.73022700  | 0.68735200  |
| C | 0.27830000  | 2.81175100  | 1.48403500  |
| C | 1.61063200  | 2.51113400  | 1.25706500  |
| C | 2.21064900  | 1.45804000  | 1.92133900  |
| C | 1.50056600  | 0.73583500  | 2.86141800  |
| C | 1.93183500  | -0.55381600 | 3.46795000  |
| C | 0.47175500  | -1.25753700 | 3.83911000  |
| C | 0.07654400  | -2.51701200 | 2.97398400  |
| C | -1.40649300 | -2.67882800 | 2.40705400  |
| C | -2.05238500 | -1.35241400 | 2.17158200  |
| C | -3.28690100 | -1.23447500 | 1.33229200  |
| C | -3.61736900 | 0.33301400  | 1.33459400  |
| C | -2.70533000 | 0.92236600  | 2.51296800  |
| C | -1.92025400 | 2.30286700  | 2.30633300  |
| C | -0.44300000 | 2.07106000  | 2.40351600  |
| C | 0.17614500  | 1.04709700  | 3.09779500  |
| C | -0.57959600 | -0.05803300 | 3.75265700  |
| C | -1.75683800 | -0.23746600 | 2.83151300  |
| F | -4.64412700 | -0.00040400 | -1.84855800 |
| F | -3.54717800 | 1.87213600  | -3.12826100 |
| F | -2.81594400 | 5.23505100  | -1.25728600 |
| F | -1.25262700 | 3.94792700  | -2.89708800 |
| F | -0.10720700 | 5.22872200  | -1.09744900 |
| F | 2.15571300  | 4.48423100  | -1.71925300 |
| F | 3.05694700  | 4.26644500  | 0.65273900  |
| F | 4.85968400  | 2.65461100  | 0.06816300  |
| F | 4.47080400  | 1.77915200  | 2.30303900  |
| F | 5.18045700  | -0.48757100 | 1.97743100  |
| F | 3.71603900  | -2.11022400 | 3.18811900  |
| F | -1.27759300 | -4.81467200 | 1.32628500  |
| F | -3.08227600 | -4.30473600 | -0.19453500 |
| F | -4.46925900 | -2.30191900 | -0.38813400 |
| F | -2.31525100 | -3.85127200 | -2.49777200 |

|    |             |             |             |
|----|-------------|-------------|-------------|
| F  | -0.00041500 | -4.76408600 | -2.08280400 |
| F  | 4.91618300  | -2.06895300 | 0.13487600  |
| F  | 5.26611900  | -0.56114000 | -1.70585600 |
| F  | 4.56701300  | 1.73680900  | -2.12157100 |
| F  | -1.94701200 | 0.84708300  | -4.63654500 |
| F  | -2.23251400 | -1.66315900 | -4.27452700 |
| F  | 0.21176900  | -1.45652800 | -4.98596200 |
| F  | 0.94911300  | -3.53856300 | -4.01016500 |
| F  | 3.06023200  | -3.40816800 | -2.68783900 |
| F  | 3.76327400  | -1.11725400 | -3.61828400 |
| F  | -2.98874200 | 4.03579400  | 1.05521100  |
| F  | -0.60312200 | 4.97397800  | 1.27281100  |
| F  | 2.58464800  | -0.34664100 | 4.65708100  |
| F  | 0.53300300  | -1.65620500 | 5.13498400  |
| F  | 0.35416700  | -3.63601500 | 3.72643700  |
| F  | -2.17438600 | -3.40291300 | 3.27951400  |
| F  | -4.29297000 | -1.88776400 | 2.01987700  |
| F  | -4.92582500 | 0.42389800  | 1.75249300  |
| F  | -3.51946800 | 1.09758400  | 3.60471800  |
| F  | -2.33018700 | 3.15945200  | 3.29844500  |
| F  | -1.02008300 | 0.26007400  | 5.01878400  |
| O  | -4.69664200 | 1.95521100  | -0.13859500 |
| H  | -5.47402600 | 1.42385400  | 0.10559900  |
| H  | -2.33368400 | 5.29230600  | -2.05782400 |
| IP |             |             |             |
| C  | 2.83182800  | 1.01019700  | -0.82744200 |
| C  | 3.28124700  | -0.09367100 | -1.72917300 |
| C  | 2.34109500  | -0.27172300 | -2.96824400 |
| C  | 1.52368100  | -1.49880900 | -2.56319900 |
| C  | 0.26655200  | -1.87324400 | -3.29452400 |
| C  | -0.64163200 | -3.01400000 | -2.64586700 |
| C  | -2.12811200 | -2.30556300 | -2.47114100 |
| C  | -2.93254100 | -2.48164300 | -1.14380200 |
| C  | -3.93266600 | -1.28743700 | -0.59049700 |
| C  | -3.67279100 | -1.28673300 | 0.99407400  |
| C  | -3.73309500 | 0.04489000  | 1.83200600  |
| C  | -2.57276800 | 0.16842900  | 3.00635300  |
| C  | -1.66319600 | 1.18466100  | 2.41852200  |
| C  | -0.34202300 | 1.38065300  | 2.76135200  |
| C  | 0.43575500  | 2.25893000  | 2.03079900  |
| C  | 1.87311500  | 2.21524900  | 2.40790700  |
| C  | 2.80169300  | 2.46343500  | 1.14608200  |
| C  | 3.49019100  | 1.17611500  | 0.50951500  |
| C  | 2.09648600  | 2.06439100  | -1.17924600 |

|   |             |             |             |
|---|-------------|-------------|-------------|
| C | 2.07580800  | 3.15782100  | -0.14721000 |
| C | 0.65049000  | 3.76780700  | 0.00691400  |
| C | -0.11195700 | 2.94810900  | 0.97526500  |
| C | -1.43347400 | 2.75509000  | 0.63012400  |
| C | -2.19959100 | 1.85106600  | 1.33485400  |
| C | -3.58204900 | 1.41556000  | 1.00909800  |
| C | -3.85275900 | 1.48750400  | -0.54064100 |
| C | -3.79276200 | 0.09701800  | -1.33852100 |
| C | -2.51498000 | 0.19085800  | -2.09665300 |
| C | -1.80501300 | -0.86134800 | -2.64214000 |
| C | -0.55436100 | -0.63204200 | -3.18230500 |
| C | -0.00791900 | 0.64075900  | -3.17590700 |
| C | 1.43948400  | 0.97790400  | -3.37844800 |
| C | 1.55864100  | 2.32079000  | -2.55064700 |
| C | 0.09394800  | 2.93219200  | -2.51057600 |
| C | -0.34207700 | 3.81280400  | -1.27228800 |
| C | -1.82419300 | 3.42592800  | -0.63444900 |
| C | -2.81011500 | 2.46828600  | -1.38479300 |
| C | -1.99542100 | 1.47187000  | -2.12936800 |
| C | -0.73380800 | 1.69620000  | -2.64996800 |
| C | 3.32422200  | -1.50523700 | -1.02694200 |
| C | 2.01464100  | -2.11006000 | -1.48775000 |
| C | 1.51146400  | -3.41724300 | -0.97708800 |
| C | -0.02208300 | -3.66582500 | -1.34635700 |
| C | -0.69720100 | -3.17097400 | -0.11365000 |
| C | -1.96093100 | -2.61531100 | -0.02538500 |
| C | -2.35476600 | -1.96708900 | 1.12928400  |
| C | -1.50824100 | -1.91993400 | 2.22089800  |
| C | -1.69669700 | -1.05979400 | 3.42202300  |
| C | -0.12866200 | -0.84211200 | 3.93049300  |
| C | 0.45482800  | 0.61364900  | 3.75627500  |
| C | 1.92928300  | 0.83273400  | 3.18708100  |
| C | 2.33289700  | -0.27135900 | 2.26503500  |
| C | 3.50753500  | -0.11954600 | 1.34917600  |
| C | 3.56418000  | -1.50498300 | 0.54821200  |
| C | 2.59318400  | -2.47625700 | 1.37460100  |
| C | 1.58060400  | -3.45076200 | 0.60159400  |
| C | 0.16596500  | -3.10224300 | 0.96564600  |
| C | -0.25105400 | -2.48664800 | 2.13266600  |
| C | 0.69926200  | -1.96830800 | 3.15693900  |
| C | 1.86481300  | -1.51427200 | 2.31878900  |
| F | 4.55487600  | 0.23001100  | -2.15130600 |
| F | 3.11567400  | -0.59093600 | -4.05395600 |
| F | 0.56701700  | -2.20631800 | -4.59797500 |

|   |             |             |             |
|---|-------------|-------------|-------------|
| F | -0.77386800 | -4.00237100 | -3.56760500 |
| F | -2.90589900 | -2.75410200 | -3.51026000 |
| F | -3.69624000 | -3.61830300 | -1.25430100 |
| F | -5.21119700 | -1.70437900 | -0.78143400 |
| F | -4.62620500 | -2.12338400 | 1.54097500  |
| F | -4.94511200 | 0.07504900  | 2.44268100  |
| F | -3.19440600 | 0.65557000  | 4.12927800  |
| F | 2.14414600  | 3.21620400  | 3.31345600  |
| F | 3.79352300  | 3.29848100  | 1.55188400  |
| F | 4.81153000  | 1.49451800  | 0.25635800  |
| F | 2.90471400  | 4.16659900  | -0.58127000 |
| F | 0.79032300  | 5.05555300  | 0.47056600  |
| F | -4.45495600 | 2.31219200  | 1.59314000  |
| F | -5.10454200 | 1.98876800  | -0.69941300 |
| F | -4.82345500 | 0.13735900  | -2.25707800 |
| F | 1.69705100  | 1.27284600  | -4.69412000 |
| F | 2.40407600  | 3.19680800  | -3.18066600 |
| F | -0.05395300 | 3.71043600  | -3.63741500 |
| F | -0.40279500 | 5.09953000  | -1.69502700 |
| F | -2.47101500 | 4.61150300  | -0.38818700 |
| F | -3.57667800 | 3.21742400  | -2.24181700 |
| F | 2.28053100  | -4.42567400 | -1.49372700 |
| F | -0.19732700 | -5.02822400 | -1.44930000 |
| F | -2.34552000 | -1.74112000 | 4.42083400  |
| F | -0.08787000 | -1.14178700 | 5.25350400  |
| F | 0.39141900  | 1.23090400  | 4.98525600  |
| F | 2.83023100  | 0.90998200  | 4.21525500  |
| F | 4.62814100  | -0.04220000 | 2.15521100  |
| F | 4.84721900  | -1.97138900 | 0.72300600  |
| F | 3.39162100  | -3.28348800 | 2.14679900  |
| F | 1.87302500  | -4.73675700 | 0.98292800  |
| F | 1.11439000  | -2.93104900 | 4.05109100  |
| O | 4.29923500  | -2.30774200 | -1.63779300 |
| H | 5.16615200  | -2.08280100 | -1.25809200 |

C<sub>1</sub>-S<sub>N</sub>2'-C40-F<sub>h</sub>

RC

|   |             |             |             |
|---|-------------|-------------|-------------|
| C | -2.75983400 | -1.15714400 | -1.00375600 |
| C | -3.37598600 | 0.19560800  | -1.09945000 |
| C | -2.86690300 | 1.12131600  | -2.26511600 |
| C | -2.38527500 | 2.47534300  | -1.48588800 |
| C | -1.02606600 | 3.12107200  | -1.88181700 |
| C | -0.18261600 | 3.94114200  | -0.77531300 |
| C | 1.38966100  | 3.51876600  | -1.09418500 |
| C | 2.39810500  | 3.21234200  | 0.06010100  |

|   |             |             |             |
|---|-------------|-------------|-------------|
| C | 3.62716100  | 2.11653600  | -0.15409100 |
| C | 3.64900100  | 1.30354100  | 1.22894100  |
| C | 4.02388900  | -0.22822500 | 1.27045100  |
| C | 3.11165100  | -1.13092800 | 2.31300500  |
| C | 2.25632400  | -1.90011900 | 1.37270900  |
| C | 1.05096300  | -2.49484100 | 1.68059600  |
| C | 0.28025000  | -3.04827300 | 0.67571300  |
| C | -1.05910900 | -3.48822400 | 1.14525900  |
| C | -2.15492500 | -3.29740400 | 0.01288500  |
| C | -3.12023900 | -2.03523000 | 0.16530400  |
| C | -1.95814900 | -1.73844100 | -1.88957500 |
| C | -1.58318900 | -3.14643500 | -1.52259500 |
| C | -0.07475200 | -3.42767800 | -1.80482900 |
| C | 0.72357900  | -3.02504200 | -0.62446300 |
| C | 1.93281900  | -2.43727100 | -0.93569100 |
| C | 2.68209400  | -1.84505800 | 0.06036900  |
| C | 3.91706400  | -1.03595100 | -0.11488100 |
| C | 3.92134800  | -0.29790600 | -1.50351500 |
| C | 3.52999000  | 1.25887100  | -1.47561600 |
| C | 2.14836100  | 1.26497000  | -2.02200400 |
| C | 1.21022700  | 2.26339100  | -1.86685600 |
| C | -0.08504900 | 2.05453300  | -2.29029500 |
| C | -0.43665000 | 0.86814500  | -2.89032000 |
| C | -1.81561900 | 0.42873200  | -3.22728500 |
| C | -1.62280400 | -1.15545200 | -3.22423000 |
| C | -0.08979600 | -1.38727000 | -3.58283200 |
| C | 0.66900200  | -2.65049400 | -3.01170500 |
| C | 2.18244300  | -2.32513300 | -2.39519500 |
| C | 2.88087000  | -0.94201500 | -2.63073600 |
| C | 1.80855500  | 0.08578200  | -2.65718600 |
| C | 0.51132400  | -0.12032400 | -3.07911400 |
| C | -3.02616500 | 0.90184900  | 0.17332300  |
| C | -2.42390900 | 2.07187400  | -0.03471300 |
| C | -2.03156200 | 3.03477500  | 1.03599400  |
| C | -0.63488500 | 3.73402000  | 0.72580100  |
| C | 0.30665800  | 2.85454500  | 1.47980000  |
| C | 1.63176000  | 2.59638500  | 1.17656200  |
| C | 2.29864300  | 1.56033800  | 1.80321900  |
| C | 1.66370300  | 0.81873000  | 2.78172100  |
| C | 2.16907500  | -0.45660300 | 3.36282200  |
| C | 0.75890000  | -1.20269400 | 3.82609500  |
| C | 0.34800200  | -2.48019300 | 2.99167400  |
| C | -1.16202700 | -2.69371300 | 2.51819500  |
| C | -1.85999500 | -1.38900600 | 2.32113600  |

|   |             |             |             |
|---|-------------|-------------|-------------|
| C | -3.13690200 | -1.28913100 | 1.53865200  |
| C | -3.39416800 | 0.27917600  | 1.48943900  |
| C | -2.54365000 | 0.87395900  | 2.67067400  |
| C | -1.83160900 | 2.28374100  | 2.42028200  |
| C | -0.34200800 | 2.09937700  | 2.44162700  |
| C | 0.34655500  | 1.09192400  | 3.09791800  |
| C | -0.32989200 | -0.03645600 | 3.80271800  |
| C | -1.55328600 | -0.26034700 | 2.95911400  |
| F | -4.74866600 | 0.02300200  | -1.20958700 |
| F | -3.94609600 | 1.45706100  | -3.02640700 |
| F | -3.34921300 | 3.43931700  | -1.69822900 |
| F | -1.25826300 | 3.97086100  | -2.94066900 |
| F | -0.31629200 | 5.26058400  | -1.05749300 |
| F | 1.91527300  | 4.51283800  | -1.88170300 |
| F | 2.98145500  | 4.39006100  | 0.45487600  |
| F | 4.78950700  | 2.81452800  | -0.22617600 |
| F | 4.57064100  | 1.94161400  | 2.03593000  |
| F | 5.31605500  | -0.30648300 | 1.67969000  |
| F | 3.97661200  | -1.96199000 | 2.98103000  |
| F | -1.02083600 | -4.83187200 | 1.44506800  |
| F | -2.93537400 | -4.40921800 | 0.04010000  |
| F | -4.40818700 | -2.47576000 | -0.05586200 |
| F | -2.30921100 | -4.00609500 | -2.31324000 |
| F | 0.06460200  | -4.77759200 | -2.03495600 |
| F | 4.99148900  | -1.90307600 | -0.13850400 |
| F | 5.17952100  | -0.39071300 | -2.00286900 |
| F | 4.35293200  | 1.87906000  | -2.39459100 |
| F | -2.13070200 | 0.80389000  | -4.51347400 |
| F | -2.41451300 | -1.74109200 | -4.17563900 |
| F | 0.01315400  | -1.43524100 | -4.95503600 |
| F | 0.82221700  | -3.52706100 | -4.03402800 |
| F | 3.01289500  | -3.32042000 | -2.84321700 |
| F | 3.56318000  | -0.98881100 | -3.81949400 |
| F | -3.00111900 | 3.99182100  | 1.14392600  |
| F | -0.66285300 | 4.97873800  | 1.31488800  |
| F | 2.88801500  | -0.22386800 | 4.50847100  |
| F | 0.91360900  | -1.59315000 | 5.11676100  |
| F | 0.70919100  | -3.58479400 | 3.72953100  |
| F | -1.85262100 | -3.43783200 | 3.43747700  |
| F | -4.13537700 | -1.86495700 | 2.29462700  |
| F | -4.72646600 | 0.51124700  | 1.71174800  |
| F | -3.36617100 | 1.01653900  | 3.75783800  |
| F | -2.23212400 | 3.13551100  | 3.41835100  |
| F | -0.70146100 | 0.27608300  | 5.09250400  |



|    |                                 |             |                          |
|----|---------------------------------|-------------|--------------------------|
| H  | -5.52070700                     | 2.96498400  | -0.98727400              |
| O  | -5.57818800                     | 2.59751300  | -0.09300600              |
| H  | -6.12276600                     | 1.80364500  | -0.19657100              |
| TS | imaginary vibrational frequency |             | -752.26 cm <sup>-1</sup> |
| C  | -2.78681800                     | -0.91553800 | -1.04430000              |
| C  | -3.42420900                     | 0.43064500  | -1.24973600              |
| C  | -2.72233500                     | 1.29902800  | -2.38195100              |
| C  | -2.11222400                     | 2.53933200  | -1.56098800              |
| C  | -0.75904800                     | 3.15114800  | -1.97047400              |
| C  | 0.09162200                      | 3.92592400  | -0.84287600              |
| C  | 1.64314900                      | 3.41147500  | -1.10392600              |
| C  | 2.59253300                      | 3.06457800  | 0.08642600               |
| C  | 3.75031900                      | 1.88639600  | -0.07694600              |
| C  | 3.68040800                      | 1.09853700  | 1.31659800               |
| C  | 3.95297000                      | -0.45409600 | 1.38732200               |
| C  | 2.95688000                      | -1.28058700 | 2.41132700               |
| C  | 2.08169100                      | -2.00893200 | 1.45702700               |
| C  | 0.83411800                      | -2.52447500 | 1.73703200               |
| C  | 0.05706800                      | -3.03962800 | 0.71640200               |
| C  | -1.32415400                     | -3.37647800 | 1.14784600               |
| C  | -2.37080400                     | -3.11123200 | -0.01871000              |
| C  | -3.24553700                     | -1.78378500 | 0.09314500               |
| C  | -2.00573900                     | -1.56838800 | -1.90428600              |
| C  | -1.74758200                     | -3.00207200 | -1.52668100              |
| C  | -0.26081400                     | -3.41012800 | -1.76781900              |
| C  | 0.53627100                      | -3.05949600 | -0.57065700              |
| C  | 1.78987500                      | -2.55683000 | -0.85305400              |
| C  | 2.54787700                      | -2.00126000 | 0.15754200               |
| C  | 3.83697500                      | -1.27551000 | 0.00988500               |
| C  | 3.93182600                      | -0.56265700 | -1.38776600              |
| C  | 3.64384800                      | 1.01569200  | -1.39196400              |
| C  | 2.28935900                      | 1.10548200  | -1.99249400              |
| C  | 1.42027000                      | 2.16966700  | -1.88856400              |
| C  | 0.13531200                      | 2.04625400  | -2.36919300              |
| C  | -0.28428600                     | 0.87732800  | -2.95964400              |
| C  | -1.68884300                     | 0.51653800  | -3.30461400              |
| C  | -1.60085900                     | -1.06330200 | -3.25064400              |
| C  | -0.08261800                     | -1.41409900 | -3.57642600              |
| C  | 0.57315000                      | -2.71201300 | -2.96230100              |
| C  | 2.08711400                      | -2.48189000 | -2.30578300              |
| C  | 2.88638200                      | -1.15524600 | -2.54054300              |
| C  | 1.89070000                      | -0.05682700 | -2.62506200              |
| C  | 0.59734100                      | -0.17902500 | -3.09434600              |
| C  | -3.31327200                     | 1.25221500  | 0.05564400               |

|   |             |             |             |
|---|-------------|-------------|-------------|
| C | -2.09927300 | 2.03704900  | -0.15306500 |
| C | -1.76457100 | 2.94839700  | 0.84743800  |
| C | -0.45159100 | 3.76050300  | 0.63401100  |
| C | 0.45446300  | 2.90122400  | 1.48118700  |
| C | 1.76122800  | 2.53839900  | 1.20474900  |
| C | 2.33979800  | 1.46169900  | 1.85869000  |
| C | 1.63602400  | 0.77510400  | 2.82831700  |
| C | 2.03412800  | -0.53077300 | 3.42582500  |
| C | 0.56541400  | -1.17717400 | 3.85247000  |
| C | 0.09560700  | -2.44011700 | 3.02508500  |
| C | -1.40901100 | -2.56104300 | 2.50618300  |
| C | -2.00548800 | -1.21620100 | 2.26343200  |
| C | -3.25778400 | -1.06033800 | 1.45710600  |
| C | -3.49513600 | 0.51375900  | 1.42444100  |
| C | -2.55265400 | 1.08061800  | 2.57654800  |
| C | -1.74761700 | 2.41645600  | 2.29773700  |
| C | -0.26435300 | 2.19018600  | 2.43591000  |
| C | 0.33241800  | 1.14242600  | 3.11210000  |
| C | -0.44316000 | 0.05667200  | 3.78170800  |
| C | -1.64344500 | -0.10199500 | 2.89043200  |
| F | -4.74489800 | 0.21515300  | -1.58236000 |
| F | -3.71012400 | 1.75271500  | -3.20137100 |
| F | -3.03868600 | 3.57968400  | -1.72085600 |
| F | -0.95135400 | 4.01686500  | -3.02380200 |
| F | 0.05456700  | 5.25137600  | -1.13085600 |
| F | 2.25374800  | 4.37193700  | -1.87433900 |
| F | 3.24650900  | 4.21027000  | 0.46853400  |
| F | 4.95731000  | 2.50816400  | -0.12148000 |
| F | 4.62438400  | 1.68547600  | 2.13773200  |
| F | 5.22531500  | -0.60880400 | 1.83670800  |
| F | 3.74578800  | -2.15718500 | 3.11561500  |
| F | -1.39914100 | -4.71587600 | 1.45742100  |
| F | -3.23114800 | -4.16316200 | -0.01009900 |
| F | -4.55680900 | -2.12556100 | -0.17766500 |
| F | -2.52008000 | -3.79694800 | -2.34244500 |
| F | -0.23183300 | -4.77027100 | -1.97854900 |
| F | 4.85239900  | -2.21138000 | 0.03511100  |
| F | 5.19654300  | -0.74646100 | -1.84489000 |
| F | 4.54094400  | 1.56715400  | -2.28585800 |
| F | -1.95773300 | 0.86959700  | -4.60768600 |
| F | -2.41976100 | -1.63046000 | -4.19168900 |
| F | 0.03275700  | -1.50692300 | -4.94565900 |
| F | 0.69536300  | -3.61890500 | -3.96246400 |
| F | 2.85844700  | -3.54077900 | -2.71403700 |

|    |             |             |             |
|----|-------------|-------------|-------------|
| F  | 3.60575800  | -1.27599900 | -3.70255700 |
| F  | -3.10585600 | 4.04686800  | 0.92902200  |
| F  | -0.57012600 | 5.01151200  | 1.18991700  |
| F  | 2.73370500  | -0.34104600 | 4.59187700  |
| F  | 0.65408400  | -1.55666100 | 5.15312900  |
| F  | 0.35638500  | -3.55273900 | 3.79243600  |
| F  | -2.17925300 | -3.23667100 | 3.41498500  |
| F  | -4.27744100 | -1.62809100 | 2.19693700  |
| F  | -4.81199500 | 0.70052900  | 1.82564700  |
| F  | -3.34217300 | 1.30780300  | 3.67944100  |
| F  | -2.17894100 | 3.36879900  | 3.18620200  |
| F  | -0.85546900 | 0.39093600  | 5.05453100  |
| O  | -4.47070800 | 2.31577700  | 0.03743800  |
| H  | -3.96437400 | 3.24808700  | 0.45269000  |
| H  | -5.20809900 | 1.99786400  | 0.60007200  |
| PC |             |             |             |
| C  | -2.71878600 | -1.10511500 | -0.94301800 |
| C  | -3.44943900 | 0.17597600  | -1.19520700 |
| C  | -2.85230800 | 1.05485200  | -2.37588100 |
| C  | -2.36419700 | 2.43727100  | -1.65071700 |
| C  | -0.97282700 | 3.04015500  | -2.03633900 |
| C  | -0.11830700 | 3.88081700  | -0.95181700 |
| C  | 1.44040300  | 3.43439700  | -1.22972100 |
| C  | 2.44202800  | 3.19055000  | -0.05078000 |
| C  | 3.65227400  | 2.06451300  | -0.20566000 |
| C  | 3.66015100  | 1.32030500  | 1.21551700  |
| C  | 4.00804100  | -0.21538000 | 1.32442500  |
| C  | 3.07379100  | -1.05682800 | 2.39175900  |
| C  | 2.21971300  | -1.85831300 | 1.47826500  |
| C  | 1.00779100  | -2.42997600 | 1.80073800  |
| C  | 0.24202800  | -3.02270600 | 0.81464500  |
| C  | -1.11082600 | -3.41717900 | 1.28673900  |
| C  | -2.19069300 | -3.24643700 | 0.13549000  |
| C  | -3.12598100 | -1.96022300 | 0.22373200  |
| C  | -1.93632100 | -1.75159500 | -1.80478100 |
| C  | -1.60117700 | -3.15789900 | -1.38864700 |
| C  | -0.10132600 | -3.49490600 | -1.64946600 |
| C  | 0.69831900  | -3.06232100 | -0.48067000 |
| C  | 1.91681300  | -2.50201400 | -0.80576200 |
| C  | 2.66131900  | -1.87081700 | 0.17026500  |
| C  | 3.90694100  | -1.08378200 | -0.02665500 |
| C  | 3.93332300  | -0.41048500 | -1.44618000 |
| C  | 3.55547000  | 1.14749500  | -1.48855800 |
| C  | 2.17970600  | 1.13909700  | -2.04673500 |

|   |             |             |             |
|---|-------------|-------------|-------------|
| C | 1.25119100  | 2.15008500  | -1.94493500 |
| C | -0.04084100 | 1.94462500  | -2.38252300 |
| C | -0.39873000 | 0.74161400  | -2.94005600 |
| C | -1.77958000 | 0.30340000  | -3.27652200 |
| C | -1.60187700 | -1.27030100 | -3.17870200 |
| C | -0.07258300 | -1.54598100 | -3.52198600 |
| C | 0.66647600  | -2.78873500 | -2.88329000 |
| C | 2.17943100  | -2.45662400 | -2.26683900 |
| C | 2.89676100  | -1.09477500 | -2.55643600 |
| C | 1.83517800  | -0.05920800 | -2.64097800 |
| C | 0.54157700  | -0.26448800 | -3.07510900 |
| C | -3.55480100 | 1.09802000  | 0.06815600  |
| C | -2.46390600 | 2.10655500  | -0.18656700 |
| C | -1.80043800 | 2.75823800  | 0.75385800  |
| C | -0.61001300 | 3.68469900  | 0.52050300  |
| C | 0.36644100  | 2.97936000  | 1.42081100  |
| C | 1.67970700  | 2.67332100  | 1.12098600  |
| C | 2.32191400  | 1.64241500  | 1.79117300  |
| C | 1.66687300  | 0.95101100  | 2.79186100  |
| C | 2.13547600  | -0.32457600 | 3.40589900  |
| C | 0.70797900  | -1.03009400 | 3.87655500  |
| C | 0.29068900  | -2.34187800 | 3.10042200  |
| C | -1.21482000 | -2.55849800 | 2.61745900  |
| C | -1.88607000 | -1.25527600 | 2.33767700  |
| C | -3.16720200 | -1.19573100 | 1.56191100  |
| C | -3.52375700 | 0.36411900  | 1.49520600  |
| C | -2.54430900 | 1.01935000  | 2.58084000  |
| C | -1.81428800 | 2.36470600  | 2.21846200  |
| C | -0.31126700 | 2.26507700  | 2.41132500  |
| C | 0.34995600  | 1.26342900  | 3.09668500  |
| C | -0.36542800 | 0.14680200  | 3.78625000  |
| C | -1.56340300 | -0.10009800 | 2.90823000  |
| F | -4.73945600 | -0.20255200 | -1.54992200 |
| F | -3.88766200 | 1.37742000  | -3.19661300 |
| F | -3.30342200 | 3.39069200  | -1.95377400 |
| F | -1.16248100 | 3.85556400  | -3.12899100 |
| F | -0.23109400 | 5.19861800  | -1.25473800 |
| F | 1.98339700  | 4.38258600  | -2.06312900 |
| F | 3.04676500  | 4.38477300  | 0.25353900  |
| F | 4.82430500  | 2.74373300  | -0.30432500 |
| F | 4.60125900  | 1.97702700  | 1.98500700  |
| F | 5.29458400  | -0.29534300 | 1.75157200  |
| F | 3.91942100  | -1.87151600 | 3.10457800  |
| F | -1.10651500 | -4.74708400 | 1.64219900  |

|    |             |             |             |
|----|-------------|-------------|-------------|
| F  | -2.99507700 | -4.33993700 | 0.19505200  |
| F  | -4.41956100 | -2.37618800 | -0.02916100 |
| F  | -2.34755100 | -4.01507400 | -2.16404900 |
| F  | -0.00096500 | -4.85660100 | -1.82103400 |
| F  | 4.97155000  | -1.96273300 | 0.00137900  |
| F  | 5.19549000  | -0.53667100 | -1.92773000 |
| F  | 4.38927000  | 1.71996000  | -2.42898500 |
| F  | -2.06156600 | 0.60821900  | -4.58858500 |
| F  | -2.40635900 | -1.91231500 | -4.08095600 |
| F  | 0.03221300  | -1.66556800 | -4.88922600 |
| F  | 0.81791100  | -3.71619900 | -3.85985100 |
| F  | 2.99996600  | -3.48161600 | -2.66331000 |
| F  | 3.59199600  | -1.20273100 | -3.73350100 |
| F  | -3.54401300 | 4.92202300  | 0.90904300  |
| F  | -0.87935700 | 4.95437200  | 1.05065700  |
| F  | 2.84857200  | -0.07496300 | 4.55234200  |
| F  | 0.83896400  | -1.36100400 | 5.18686000  |
| F  | 0.62763100  | -3.41341100 | 3.89607000  |
| F  | -1.92836100 | -3.24180000 | 3.56483000  |
| F  | -4.12260700 | -1.82437000 | 2.33830400  |
| F  | -4.79708300 | 0.47124800  | 1.98181200  |
| F  | -3.27962500 | 1.26168400  | 3.71644000  |
| F  | -2.35111000 | 3.38362700  | 2.97913000  |
| F  | -0.78776100 | 0.48177800  | 5.05502500  |
| O  | -4.73170100 | 1.85502100  | -0.02961900 |
| H  | -5.47743200 | 1.24055400  | -0.15014200 |
| H  | -2.74754500 | 5.31838600  | 1.20157200  |
| IP |             |             |             |
| C  | 2.93455400  | 0.19301200  | 0.96963500  |
| C  | 3.41956600  | 1.39991700  | 0.22971800  |
| C  | 2.69795700  | 2.75566100  | 0.63469900  |
| C  | 1.94188700  | 3.24133000  | -0.73110000 |
| C  | 0.47058400  | 3.76803300  | -0.63476000 |
| C  | -0.55426600 | 3.56949100  | -1.86892500 |
| C  | -1.99180600 | 3.22591800  | -1.15092600 |
| C  | -2.96027300 | 2.14479800  | -1.73876800 |
| C  | -3.93243600 | 1.26086300  | -0.72280300 |
| C  | -3.83647700 | -0.22864900 | -1.30999100 |
| C  | -3.89274700 | -1.48103500 | -0.35124700 |
| C  | -2.84509000 | -2.69265200 | -0.74298200 |
| C  | -1.83340800 | -2.57835300 | 0.33900300  |
| C  | -0.54506700 | -3.06598800 | 0.29437500  |
| C  | 0.34248000  | -2.76094900 | 1.30922900  |
| C  | 1.73363400  | -3.19355400 | 1.01545900  |

|   |             |             |             |
|---|-------------|-------------|-------------|
| C | 2.79080100  | -2.17121600 | 1.61578000  |
| C | 3.46543000  | -1.15949700 | 0.58664800  |
| C | 2.31133500  | 0.18539900  | 2.14650200  |
| C | 2.23436700  | -1.17398800 | 2.78693400  |
| C | 0.83073000  | -1.43960100 | 3.41395200  |
| C | -0.06548800 | -1.99160800 | 2.37207800  |
| C | -1.35838900 | -1.51172800 | 2.42736600  |
| C | -2.23200500 | -1.78059400 | 1.39293000  |
| C | -3.59722100 | -1.22146000 | 1.20935700  |
| C | -3.71381800 | 0.21051400  | 1.84543200  |
| C | -3.63291400 | 1.43904400  | 0.81808300  |
| C | -2.26614500 | 1.97076000  | 1.04674700  |
| C | -1.54676600 | 2.76764900  | 0.18625000  |
| C | -0.22894300 | 3.06608100  | 0.46381000  |
| C | 0.36167100  | 2.58730300  | 1.60723800  |
| C | 1.80742700  | 2.65872400  | 1.94724300  |
| C | 1.92617400  | 1.40674400  | 2.91494200  |
| C | 0.48395100  | 1.23723700  | 3.56685000  |
| C | -0.02436900 | -0.19757700 | 3.99397500  |
| C | -1.58805400 | -0.54640600 | 3.53237000  |
| C | -2.54026600 | 0.56462800  | 2.97322100  |
| C | -1.68922500 | 1.51882800  | 2.21744000  |
| C | -0.36965100 | 1.81415800  | 2.49147000  |
| C | 3.32173800  | 1.26290400  | -1.32926300 |
| C | 2.07059800  | 2.04616200  | -1.63715400 |
| C | 1.26030200  | 1.81683800  | -2.65770400 |
| C | -0.06934000 | 2.51938100  | -2.92590700 |
| C | -0.92271800 | 1.27908300  | -3.01123500 |
| C | -2.14591600 | 1.08393800  | -2.39831000 |
| C | -2.59792800 | -0.20253700 | -2.14167800 |
| C | -1.85058900 | -1.29373200 | -2.53996200 |
| C | -2.08616400 | -2.70211300 | -2.10984300 |
| C | -0.56475500 | -3.35712400 | -2.21127500 |
| C | 0.11062500  | -3.76665500 | -0.84154200 |
| C | 1.64128900  | -3.41994900 | -0.55263100 |
| C | 2.06125600  | -2.18502700 | -1.27652600 |
| C | 3.32863600  | -1.47106200 | -0.91631000 |
| C | 3.38888500  | -0.22711400 | -1.92359100 |
| C | 2.27413300  | -0.57995800 | -3.01956700 |
| C | 1.31592100  | 0.56518100  | -3.51145100 |
| C | -0.14812700 | 0.17888200  | -3.38979000 |
| C | -0.62442700 | -1.09860600 | -3.15898200 |
| C | 0.27053600  | -2.29158800 | -3.05457100 |
| C | 1.51356100  | -1.74566800 | -2.40389200 |

|                                                      |             |             |             |
|------------------------------------------------------|-------------|-------------|-------------|
| F                                                    | 4.76579100  | 1.51482900  | 0.55733600  |
| F                                                    | 3.67482000  | 3.66520000  | 0.89607600  |
| F                                                    | 2.69557900  | 4.26791300  | -1.24857600 |
| F                                                    | 0.53329800  | 5.11652800  | -0.36394300 |
| F                                                    | -0.68654000 | 4.76131700  | -2.50243700 |
| F                                                    | -2.68318500 | 4.40985800  | -1.05256500 |
| F                                                    | -3.78778200 | 2.75697600  | -2.64674000 |
| F                                                    | -5.20878300 | 1.68240100  | -0.91823700 |
| F                                                    | -4.90355100 | -0.36714600 | -2.17679400 |
| F                                                    | -5.15211500 | -1.98181200 | -0.43622500 |
| F                                                    | -3.54084200 | -3.87219100 | -0.63266400 |
| F                                                    | 1.97297600  | -4.41429600 | 1.60468400  |
| F                                                    | 3.78475600  | -2.92036500 | 2.16098400  |
| F                                                    | 4.82042700  | -1.13890200 | 0.85996700  |
| F                                                    | 3.14773000  | -1.20444100 | 3.81560900  |
| F                                                    | 0.99394500  | -2.34693900 | 4.43567000  |
| F                                                    | -4.47917200 | -2.02422100 | 1.90516400  |
| F                                                    | -4.91785400 | 0.27764800  | 2.46768600  |
| F                                                    | -4.53354200 | 2.38148700  | 1.27451500  |
| F                                                    | 2.05906000  | 3.78665300  | 2.69464800  |
| F                                                    | 2.85855700  | 1.62788100  | 3.89227400  |
| F                                                    | 0.43733000  | 2.03817500  | 4.68532300  |
| F                                                    | 0.02661100  | -0.25934500 | 5.34690600  |
| F                                                    | -2.19205600 | -1.14521600 | 4.60856800  |
| F                                                    | -3.17297300 | 1.17553800  | 4.02514200  |
| F                                                    | -0.01217200 | 3.14590200  | -4.15732100 |
| F                                                    | -2.86169800 | -3.36382400 | -3.02964700 |
| F                                                    | -0.66314200 | -4.48297600 | -2.96394900 |
| F                                                    | -0.03769200 | -5.12831200 | -0.70292300 |
| F                                                    | 2.44760600  | -4.46066000 | -0.92718500 |
| F                                                    | 4.36489500  | -2.33075400 | -1.22934900 |
| F                                                    | 4.60562300  | -0.31253400 | -2.54226400 |
| F                                                    | 2.92202300  | -1.05949600 | -4.13349600 |
| F                                                    | 1.65328600  | 0.89747600  | -4.80677900 |
| F                                                    | 0.59588500  | -2.82931000 | -4.28155400 |
| O                                                    | 4.34164100  | 2.03351100  | -1.91096800 |
| H                                                    | 5.19156300  | 1.74968800  | -1.52967900 |
| C <sub>1</sub> -S <sub>N</sub> 2'-C41-F <sub>f</sub> |             |             |             |
| RC                                                   |             |             |             |
| C                                                    | -2.75992600 | -1.15693200 | -1.00372300 |
| C                                                    | -3.37611000 | 0.19583500  | -1.09934500 |
| C                                                    | -2.86694100 | 1.12161700  | -2.26495600 |
| C                                                    | -2.38515800 | 2.47548100  | -1.48565300 |
| C                                                    | -1.02599100 | 3.12125900  | -1.88163700 |

|   |             |             |             |
|---|-------------|-------------|-------------|
| C | -0.18246500 | 3.94119800  | -0.77506300 |
| C | 1.38977000  | 3.51874500  | -1.09399400 |
| C | 2.39825400  | 3.21223400  | 0.06022300  |
| C | 3.62724000  | 2.11638600  | -0.15407500 |
| C | 3.64910000  | 1.30330900  | 1.22891700  |
| C | 4.02392300  | -0.22846400 | 1.27031500  |
| C | 3.11168500  | -1.13120300 | 2.31285300  |
| C | 2.25629500  | -1.90030300 | 1.37253700  |
| C | 1.05091000  | -2.49497700 | 1.68042500  |
| C | 0.28013700  | -3.04831000 | 0.67553500  |
| C | -1.05922900 | -3.48823100 | 1.14508800  |
| C | -2.15506800 | -3.29728300 | 0.01277000  |
| C | -3.12030500 | -2.03507800 | 0.16529200  |
| C | -1.95825900 | -1.73818600 | -1.88958500 |
| C | -1.58335600 | -3.14622500 | -1.52272700 |
| C | -0.07496500 | -3.42754900 | -1.80502500 |
| C | 0.72341800  | -3.02500900 | -0.62465800 |
| C | 1.93265700  | -2.43724900 | -0.93588600 |
| C | 2.68202200  | -1.84517600 | 0.06018600  |
| C | 3.91701400  | -1.03610500 | -0.11506400 |
| C | 3.92127600  | -0.29797500 | -1.50364600 |
| C | 3.52996000  | 1.25878800  | -1.47561800 |
| C | 2.14831800  | 1.26497100  | -2.02196200 |
| C | 1.21025100  | 2.26343800  | -1.86674500 |
| C | -0.08502200 | 2.05471700  | -2.29024700 |
| C | -0.43670000 | 0.86839900  | -2.89038300 |
| C | -1.81571100 | 0.42902100  | -3.22723500 |
| C | -1.62295000 | -1.15516000 | -3.22422300 |
| C | -0.08997300 | -1.38703600 | -3.58294100 |
| C | 0.66881600  | -2.65031400 | -3.01188300 |
| C | 2.18224000  | -2.32506100 | -2.39539000 |
| C | 2.88073000  | -0.94198200 | -2.63090400 |
| C | 1.80846300  | 0.08586900  | -2.65726800 |
| C | 0.51122200  | -0.12011900 | -3.07923700 |
| C | -3.02615200 | 0.90198300  | 0.17347900  |
| C | -2.42373000 | 2.07193100  | -0.03450600 |
| C | -2.03134700 | 3.03477000  | 1.03624300  |
| C | -0.63471500 | 3.73402600  | 0.72607500  |
| C | 0.30685200  | 2.85449100  | 1.48000800  |
| C | 1.63192100  | 2.59626600  | 1.17669300  |
| C | 2.29877100  | 1.56014000  | 1.80325700  |
| C | 1.66384800  | 0.81850700  | 2.78174400  |
| C | 2.16918000  | -0.45689200 | 3.36273600  |
| C | 0.75895900  | -1.20294700 | 3.82601200  |



|   |             |             |             |
|---|-------------|-------------|-------------|
| C | 0.34799300  | -2.48038500 | 2.99153200  |
| C | -1.16205700 | -2.69381300 | 2.51808600  |
| C | -1.85996400 | -1.38905400 | 2.32112700  |
| C | -3.13689500 | -1.28908900 | 1.53869800  |
| C | -3.39410900 | 0.27924800  | 1.48959500  |
| C | -2.54350500 | 0.87392000  | 2.67081300  |
| C | -1.83141600 | 2.28368400  | 2.42048000  |
| C | -0.34181400 | 2.09928300  | 2.44181600  |
| C | 0.34672400  | 1.09175500  | 3.09801600  |
| C | -0.32976000 | -0.03665700 | 3.80272000  |
| C | -1.55318200 | -0.26044300 | 2.95913800  |
| F | -4.74871600 | 0.02327300  | -1.20946400 |
| F | -3.94610900 | 1.45746100  | -3.02622100 |
| F | -3.34907300 | 3.43960900  | -1.69783400 |
| F | -1.25823700 | 3.97113800  | -2.94036800 |
| F | -0.31606000 | 5.26066700  | -1.05716500 |
| F | 1.91540100  | 4.51282700  | -1.88150900 |
| F | 2.98166700  | 4.38991500  | 0.45501900  |
| F | 4.78962300  | 2.81431500  | -0.22617500 |
| F | 4.57078900  | 1.94130800  | 2.03590300  |
| F | 5.31610200  | -0.30681500 | 1.67949900  |
| F | 3.97664200  | -1.96232700 | 2.98079800  |
| F | -1.02101100 | -4.83190500 | 1.44480300  |
| F | -2.93555100 | -4.40907000 | 0.03992300  |
| F | -4.40831100 | -2.47551200 | -0.05586900 |
| F | -2.30947400 | -4.00577900 | -2.31340800 |
| F | 0.06431500  | -4.77744600 | -2.03524400 |
| F | 4.99141400  | -1.90325600 | -0.13877400 |
| F | 5.17942900  | -0.39081400 | -2.00304900 |
| F | 4.35285400  | 1.87903300  | -2.39463400 |
| F | -2.13093000 | 0.80421000  | -4.51338100 |
| F | -2.41474700 | -1.74074300 | -4.17561000 |
| F | 0.01285600  | -1.43498700 | -4.95515100 |
| F | 0.82196700  | -3.52684400 | -4.03425200 |
| F | 3.01265400  | -3.32039000 | -2.84344100 |
| F | 3.56301300  | -0.98875900 | -3.81966500 |
| F | -3.00093100 | 3.99177300  | 1.14427100  |
| F | -0.66263900 | 4.97871300  | 1.31520600  |
| F | 2.88815500  | -0.22428000 | 4.50838000  |
| F | 0.91369600  | -1.59347500 | 5.11665100  |
| F | 0.70917600  | -3.58503600 | 3.72931300  |
| F | -1.85266500 | -3.43795400 | 3.43733700  |
| F | -4.13535200 | -1.86493200 | 2.29466700  |
| F | -4.72641400 | 0.51129600  | 1.71201400  |

|    |                                 |             |                          |
|----|---------------------------------|-------------|--------------------------|
| F  | -3.36596200                     | 1.01646600  | 3.75803300               |
| F  | -2.23191700                     | 3.13543000  | 3.41857900               |
| F  | -0.70133800                     | 0.27580300  | 5.09254400               |
| H  | -5.52150300                     | 2.96408100  | -0.98775300              |
| O  | -5.57763900                     | 2.59718000  | -0.09318100              |
| H  | -6.12330700                     | 1.80385300  | -0.19530000              |
| TS | imaginary vibrational frequency |             | -771.53 cm <sup>-1</sup> |
| C  | -2.82606200                     | -1.17331300 | -1.04780800              |
| C  | -3.13338800                     | 0.25295300  | -1.04338100              |
| C  | -2.83637800                     | 1.12910000  | -2.26845700              |
| C  | -2.44194100                     | 2.55767700  | -1.55574800              |
| C  | -1.01303100                     | 3.12290700  | -1.86332400              |
| C  | -0.18771300                     | 3.93518700  | -0.76282200              |
| C  | 1.38885600                      | 3.50857600  | -1.07226200              |
| C  | 2.38351600                      | 3.19226900  | 0.08474300               |
| C  | 3.61386100                      | 2.09414600  | -0.12610700              |
| C  | 3.61724900                      | 1.27411700  | 1.25107100               |
| C  | 3.99102200                      | -0.25846000 | 1.28854900               |
| C  | 3.07150600                      | -1.16223700 | 2.32202800               |
| C  | 2.21776200                      | -1.92461700 | 1.37410600               |
| C  | 1.00787000                      | -2.51448500 | 1.67280800               |
| C  | 0.23497000                      | -3.05201300 | 0.66045500               |
| C  | -1.10431300                     | -3.49874000 | 1.12031700               |
| C  | -2.20105300                     | -3.30321100 | -0.01772300              |
| C  | -3.16093900                     | -2.03931000 | 0.13756300               |
| C  | -2.03110400                     | -1.76405100 | -1.94478100              |
| C  | -1.63323300                     | -3.16143300 | -1.56057400              |
| C  | -0.11090300                     | -3.42452700 | -1.82342600              |
| C  | 0.68022000                      | -3.02039000 | -0.63780000              |
| C  | 1.89875800                      | -2.44563200 | -0.93851100              |
| C  | 2.64885800                      | -1.86431500 | 0.06387700               |
| C  | 3.89057700                      | -1.06236100 | -0.09912300              |
| C  | 3.91089900                      | -0.31968000 | -1.48376700              |
| C  | 3.52615600                      | 1.24040400  | -1.45190100              |
| C  | 2.14713600                      | 1.25133800  | -2.00216300              |
| C  | 1.20818100                      | 2.24749000  | -1.83412400              |
| C  | -0.08849200                     | 2.03269700  | -2.24193800              |
| C  | -0.43193400                     | 0.85724900  | -2.86179400              |
| C  | -1.80086400                     | 0.44321700  | -3.23160600              |
| C  | -1.64296500                     | -1.14937700 | -3.25358700              |
| C  | -0.09874800                     | -1.38520700 | -3.58750500              |
| C  | 0.64716900                      | -2.65311800 | -3.02186100              |
| C  | 2.16173500                      | -2.33588700 | -2.39506000              |
| C  | 2.87460500                      | -0.95623200 | -2.62037400              |

|   |             |             |             |
|---|-------------|-------------|-------------|
| C | 1.80778500  | 0.07577200  | -2.64484900 |
| C | 0.50966600  | -0.12991400 | -3.06275100 |
| C | -2.73827400 | 0.86253800  | 0.15187700  |
| C | -2.78641200 | 2.29414200  | -0.04879000 |
| C | -2.12697300 | 3.12946800  | 1.06836400  |
| C | -0.65744600 | 3.71900800  | 0.72086800  |
| C | 0.26085900  | 2.80417700  | 1.45559500  |
| C | 1.59554200  | 2.56008300  | 1.17545100  |
| C | 2.25843600  | 1.52578800  | 1.80641600  |
| C | 1.61784000  | 0.78519800  | 2.78113100  |
| C | 2.12529800  | -0.48770200 | 3.36769000  |
| C | 0.71845100  | -1.23590700 | 3.82806100  |
| C | 0.30548100  | -2.51088100 | 2.98392000  |
| C | -1.20411700 | -2.72219500 | 2.50678400  |
| C | -1.88997900 | -1.41398200 | 2.32023200  |
| C | -3.14285600 | -1.27812300 | 1.50404100  |
| C | -3.29379500 | 0.27963400  | 1.41873500  |
| C | -2.56000400 | 0.84882900  | 2.65513100  |
| C | -1.87448900 | 2.26630400  | 2.42373400  |
| C | -0.39047400 | 2.05838600  | 2.41474000  |
| C | 0.29960900  | 1.05810900  | 3.08950200  |
| C | -0.36619300 | -0.06768400 | 3.81177000  |
| C | -1.58485400 | -0.29149100 | 2.97296600  |
| F | -4.89926000 | 0.48408000  | -1.00279400 |
| F | -3.94760700 | 1.36515900  | -3.02201800 |
| F | -3.31847600 | 3.51848100  | -2.03666100 |
| F | -1.15508600 | 3.96128500  | -2.95310200 |
| F | -0.32272000 | 5.25712500  | -1.04207200 |
| F | 1.91717300  | 4.50036700  | -1.85937700 |
| F | 2.96406800  | 4.36283400  | 0.50442700  |
| F | 4.77809600  | 2.79002200  | -0.18397300 |
| F | 4.52759800  | 1.90709100  | 2.07507200  |
| F | 5.28133600  | -0.33804100 | 1.70436400  |
| F | 3.93094700  | -1.99667700 | 2.99322300  |
| F | -1.06068400 | -4.84645100 | 1.40417800  |
| F | -2.98375300 | -4.41394700 | 0.01488600  |
| F | -4.45271000 | -2.47652900 | -0.05564500 |
| F | -2.33075700 | -4.05738500 | -2.33684500 |
| F | 0.04216700  | -4.77538100 | -2.04625000 |
| F | 4.96119100  | -1.93469300 | -0.11608900 |
| F | 5.17225900  | -0.41536300 | -1.97437900 |
| F | 4.35780300  | 1.86166900  | -2.36210400 |
| F | -2.08660500 | 0.85239700  | -4.51473300 |
| F | -2.40904800 | -1.69243400 | -4.25064500 |

|    |             |             |             |
|----|-------------|-------------|-------------|
| F  | 0.02605200  | -1.41621500 | -4.95906600 |
| F  | 0.80179000  | -3.52688000 | -4.04658500 |
| F  | 2.98870400  | -3.33605700 | -2.83861900 |
| F  | 3.56446600  | -1.00174400 | -3.80471900 |
| F  | -2.93012000 | 4.19589000  | 1.35286100  |
| F  | -0.60655100 | 4.95746200  | 1.32836300  |
| F  | 2.84142700  | -0.24911200 | 4.51445600  |
| F  | 0.87472000  | -1.63569800 | 5.11596500  |
| F  | 0.67088900  | -3.61856700 | 3.71540100  |
| F  | -1.89533100 | -3.47719500 | 3.41690500  |
| F  | -4.18037500 | -1.78998600 | 2.25669500  |
| F  | -4.64210400 | 0.58678900  | 1.56268500  |
| F  | -3.43701800 | 0.97711200  | 3.70272300  |
| F  | -2.23341400 | 3.08022400  | 3.47047400  |
| F  | -0.72233800 | 0.25384500  | 5.10413200  |
| H  | -4.55402100 | 3.38499600  | -0.58049000 |
| O  | -4.37369200 | 2.61454600  | -0.00244400 |
| H  | -4.80267400 | 1.67557300  | -0.45181900 |
| PC |             |             |             |
| C  | -2.63838500 | -1.14550700 | -0.99089900 |
| C  | -2.77362200 | 0.26883700  | -1.08371200 |
| C  | -2.65111600 | 1.00720700  | -2.37871800 |
| C  | -2.32847800 | 2.52059900  | -1.86324300 |
| C  | -0.85405000 | 3.00843500  | -2.15206600 |
| C  | -0.02751500 | 3.87236600  | -1.08972100 |
| C  | 1.54197100  | 3.37698700  | -1.31054800 |
| C  | 2.48804800  | 3.11987000  | -0.09670600 |
| C  | 3.69006200  | 1.97720900  | -0.17645300 |
| C  | 3.62539300  | 1.26811700  | 1.26227400  |
| C  | 3.94673700  | -0.26617600 | 1.43486200  |
| C  | 2.96235800  | -1.05760700 | 2.50357400  |
| C  | 2.11633200  | -1.86521500 | 1.58747600  |
| C  | 0.87969200  | -2.39614100 | 1.88754800  |
| C  | 0.12934500  | -2.99933200 | 0.89538200  |
| C  | -1.23702300 | -3.36793800 | 1.34527600  |
| C  | -2.28422700 | -3.23867700 | 0.16324200  |
| C  | -3.16268100 | -1.91584800 | 0.17936600  |
| C  | -1.95755300 | -1.87583300 | -1.87600900 |
| C  | -1.66304900 | -3.26010900 | -1.38105900 |
| C  | -0.13522800 | -3.56969200 | -1.56787000 |
| C  | 0.62031500  | -3.08815900 | -0.38563300 |
| C  | 1.86093400  | -2.56195700 | -0.68664000 |
| C  | 2.59296300  | -1.92211400 | 0.29310800  |
| C  | 3.86439600  | -1.17222900 | 0.11053800  |

|   |             |             |             |
|---|-------------|-------------|-------------|
| C | 3.95272700  | -0.54049400 | -1.32713100 |
| C | 3.61548100  | 1.02617500  | -1.43281600 |
| C | 2.25644600  | 1.03524100  | -2.03362200 |
| C | 1.34315700  | 2.06873100  | -1.98314100 |
| C | 0.05422400  | 1.86498200  | -2.42722300 |
| C | -0.29437600 | 0.65837100  | -2.98846000 |
| C | -1.67474800 | 0.24829600  | -3.33122400 |
| C | -1.54149000 | -1.35823500 | -3.21969200 |
| C | -0.00278400 | -1.65676500 | -3.49280800 |
| C | 0.68485800  | -2.89828100 | -2.79570400 |
| C | 2.17891900  | -2.57299500 | -2.13674300 |
| C | 2.93707600  | -1.23515100 | -2.44535400 |
| C | 1.90499800  | -0.17764000 | -2.59441300 |
| C | 0.62231400  | -0.37326600 | -3.06068300 |
| C | -2.93233000 | 1.03699300  | -0.00839400 |
| C | -2.85440000 | 2.50179700  | -0.33500000 |
| C | -2.02985200 | 3.30660200  | 0.74380100  |
| C | -0.53660700 | 3.79031400  | 0.39079200  |
| C | 0.31250600  | 2.89120000  | 1.21549000  |
| C | 1.64762000  | 2.59337700  | 1.00977400  |
| C | 2.25720900  | 1.59982800  | 1.74788200  |
| C | 1.55821100  | 0.95831500  | 2.75334000  |
| C | 2.00241500  | -0.27565800 | 3.45978700  |
| C | 0.55334800  | -0.94085100 | 3.92300200  |
| C | 0.13060200  | -2.26345500 | 3.16675900  |
| C | -1.36753500 | -2.46566900 | 2.65419300  |
| C | -2.01446000 | -1.15487000 | 2.34421700  |
| C | -3.23855300 | -1.06634500 | 1.48240000  |
| C | -3.41221500 | 0.50319000  | 1.30488100  |
| C | -2.63279700 | 1.15150100  | 2.49015700  |
| C | -1.86816600 | 2.52107300  | 2.15949600  |
| C | -0.39588200 | 2.24908300  | 2.20754600  |
| C | 0.23864700  | 1.29105000  | 2.98587500  |
| C | -0.49247200 | 0.25609800  | 3.77268400  |
| C | -1.69757600 | 0.00757700  | 2.91425100  |
| F | -5.63997300 | 0.07807500  | -1.00430400 |
| F | -3.88181000 | 1.03922300  | -2.98364700 |
| F | -3.14662100 | 3.38383500  | -2.53505600 |
| F | -0.91815800 | 3.77345700  | -3.30190400 |
| F | -0.10953500 | 5.17371900  | -1.47075500 |
| F | 2.13299000  | 4.28831000  | -2.14865400 |
| F | 3.08814200  | 4.30198900  | 0.25787200  |
| F | 4.87657900  | 2.63285000  | -0.24761400 |
| F | 4.52750900  | 1.93867600  | 2.06429100  |

|    |             |             |             |
|----|-------------|-------------|-------------|
| F  | 5.21844500  | -0.35249700 | 1.90215400  |
| F  | 3.77032600  | -1.86297200 | 3.26722700  |
| F  | -1.24685600 | -4.68405900 | 1.75158000  |
| F  | -3.12319000 | -4.30111300 | 0.26721500  |
| F  | -4.45378200 | -2.27897100 | -0.13170900 |
| F  | -2.36195300 | -4.20057000 | -2.09238700 |
| F  | 0.00222500  | -4.93401900 | -1.68713100 |
| F  | 4.90517900  | -2.07581000 | 0.19741100  |
| F  | 5.22698300  | -0.71027500 | -1.76161200 |
| F  | 4.49596000  | 1.54789800  | -2.35964800 |
| F  | -1.98892400 | 0.55890900  | -4.63178300 |
| F  | -2.30317700 | -1.96780000 | -4.17949400 |
| F  | 0.15897800  | -1.81270500 | -4.85164400 |
| F  | 0.85372700  | -3.85194900 | -3.74403000 |
| F  | 2.99413100  | -3.62611600 | -2.46582500 |
| F  | 3.66461700  | -1.39601100 | -3.59690100 |
| F  | -2.74217100 | 4.45687400  | 0.98348000  |
| F  | -0.40928400 | 5.06583300  | 0.91032200  |
| F  | 2.68388700  | 0.03060200  | 4.61075500  |
| F  | 0.64718700  | -1.24009800 | 5.24351200  |
| F  | 0.42962500  | -3.32001200 | 3.99695800  |
| F  | -2.11458600 | -3.11984700 | 3.59749200  |
| F  | -4.30948200 | -1.53560200 | 2.21334600  |
| F  | -4.75473700 | 0.82763600  | 1.43394700  |
| F  | -3.50817600 | 1.40349600  | 3.51454400  |
| F  | -2.21095000 | 3.41389200  | 3.14573400  |
| F  | -0.87835800 | 0.69424000  | 5.02089100  |
| O  | -4.18683100 | 2.94591700  | -0.30241500 |
| H  | -4.19701200 | 3.91575200  | -0.37596200 |
| H  | -5.70205600 | 0.68185500  | -0.29016700 |
| IP |             |             |             |
| C  | -2.63229800 | -1.09834200 | -1.19878300 |
| C  | -2.75538800 | 0.31546400  | -1.30752600 |
| C  | -2.52201400 | 1.04361300  | -2.59139100 |
| C  | -2.22418300 | 2.55408500  | -2.06313000 |
| C  | -0.72287800 | 3.01894400  | -2.23776200 |
| C  | 0.03256900  | 3.87158200  | -1.11549700 |
| C  | 1.60676800  | 3.35297000  | -1.21351600 |
| C  | 2.45290000  | 3.08403300  | 0.06971300  |
| C  | 3.64028800  | 1.92368200  | 0.08388700  |
| C  | 3.45455800  | 1.21891200  | 1.51447900  |
| C  | 3.73985400  | -0.31897700 | 1.71344400  |
| C  | 2.66471400  | -1.09309700 | 2.70502900  |
| C  | 1.87893400  | -1.88931600 | 1.72750400  |

|   |             |             |             |
|---|-------------|-------------|-------------|
| C | 0.61572400  | -2.40231400 | 1.93344500  |
| C | -0.06559900 | -2.99824000 | 0.88814100  |
| C | -1.46857400 | -3.34335000 | 1.23261900  |
| C | -2.41952300 | -3.19812300 | -0.02713300 |
| C | -3.26373800 | -1.85737700 | -0.07772300 |
| C | -1.90712400 | -1.84491100 | -2.03336900 |
| C | -1.68039500 | -3.23382300 | -1.51843900 |
| C | -0.14880800 | -3.56980600 | -1.58786000 |
| C | 0.52104100  | -3.09741200 | -0.35153500 |
| C | 1.78791900  | -2.58826600 | -0.55822500 |
| C | 2.45218500  | -1.95656900 | 0.47356200  |
| C | 3.74506400  | -1.22654700 | 0.38774000  |
| C | 3.95243100  | -0.59962700 | -1.03985600 |
| C | 3.64812100  | 0.97141700  | -1.17325200 |
| C | 2.34014900  | 0.99973800  | -1.87829600 |
| C | 1.44156900  | 2.04698400  | -1.89956000 |
| C | 0.18821200  | 1.86247000  | -2.44327700 |
| C | -0.13374100 | 0.65964500  | -3.02835100 |
| C | -1.49143900 | 0.26827200  | -3.46977100 |
| C | -1.38935700 | -1.33931100 | -3.34494000 |
| C | 0.15974400  | -1.66225400 | -3.50238900 |
| C | 0.77268800  | -2.91205000 | -2.75055200 |
| C | 2.21596600  | -2.60745700 | -1.97953200 |
| C | 3.01590600  | -1.28204600 | -2.23189700 |
| C | 2.01529400  | -0.20906500 | -2.46369600 |
| C | 0.77000200  | -0.38623600 | -3.02855200 |
| C | -3.01526400 | 1.09060000  | -0.25600600 |
| C | -2.87642000 | 2.55538400  | -0.57834400 |
| C | -2.11343300 | 3.34098000  | 0.56242000  |
| C | -0.58967200 | 3.79927700  | 0.32199100  |
| C | 0.17934900  | 2.88781500  | 1.20919200  |
| C | 1.52184800  | 2.57069400  | 1.10738200  |
| C | 2.05798000  | 1.57067600  | 1.89206600  |
| C | 1.27508600  | 0.94306700  | 2.84286300  |
| C | 1.64622000  | -0.29443100 | 3.58403100  |
| C | 0.15622300  | -0.93674000 | 3.93668200  |
| C | -0.22680300 | -2.25475800 | 3.15161600  |
| C | -1.68409100 | -2.43480500 | 2.52699500  |
| C | -2.28475800 | -1.11515600 | 2.16680200  |
| C | -3.43607900 | -1.01168900 | 1.21428800  |
| C | -3.59137600 | 0.56106700  | 1.02443600  |
| C | -2.88266700 | 1.20026100  | 2.26166600  |
| C | -2.07198400 | 2.55499500  | 1.98647600  |
| C | -0.61230600 | 2.25904900  | 2.14478300  |

|                                                      |             |             |             |
|------------------------------------------------------|-------------|-------------|-------------|
| C                                                    | -0.05322200 | 1.29589600  | 2.97291400  |
| C                                                    | -0.85763100 | 0.27589500  | 3.70590500  |
| C                                                    | -1.99863400 | 0.04403200  | 2.75917700  |
| F                                                    | -3.71110700 | 1.08045400  | -3.28411400 |
| F                                                    | -2.97256500 | 3.42139300  | -2.80527300 |
| F                                                    | -0.68682900 | 3.78356000  | -3.38930500 |
| F                                                    | -0.00065900 | 5.17334600  | -1.50223000 |
| F                                                    | 2.27393500  | 4.25435400  | -2.00408800 |
| F                                                    | 3.04112200  | 4.25767100  | 0.46921300  |
| F                                                    | 4.83871800  | 2.56105300  | 0.10384000  |
| F                                                    | 4.30131200  | 1.87924700  | 2.38261500  |
| F                                                    | 4.97095500  | -0.42278200 | 2.27614200  |
| F                                                    | 3.39961800  | -1.90930500 | 3.52853200  |
| F                                                    | -1.53372100 | -4.65831600 | 1.63695100  |
| F                                                    | -3.28686100 | -4.24204300 | 0.01167900  |
| F                                                    | -4.53708400 | -2.18037700 | -0.50815000 |
| F                                                    | -2.34056100 | -4.16110300 | -2.28271100 |
| F                                                    | -0.02468900 | -4.93610900 | -1.69684500 |
| F                                                    | 4.76231200  | -2.14570900 | 0.55458300  |
| F                                                    | 5.25362300  | -0.78928700 | -1.37547800 |
| F                                                    | 4.60538500  | 1.47753000  | -2.03003300 |
| F                                                    | -1.70802100 | 0.57905500  | -4.79029700 |
| F                                                    | -2.08985700 | -1.94128700 | -4.35557600 |
| F                                                    | 0.41952000  | -1.82767200 | -4.84470100 |
| F                                                    | 0.99940500  | -3.87098200 | -3.68137000 |
| F                                                    | 3.03822000  | -3.67350400 | -2.24352400 |
| F                                                    | 3.82768300  | -1.45811000 | -3.32323300 |
| F                                                    | -2.81858300 | 4.50528700  | 0.75229700  |
| F                                                    | -0.47906600 | 5.07340200  | 0.84896400  |
| F                                                    | 2.24248200  | 0.00536600  | 4.78291200  |
| F                                                    | 0.14491400  | -1.23505200 | 5.26070600  |
| F                                                    | -0.00832500 | -3.31415400 | 4.00320600  |
| F                                                    | -2.51007900 | -3.07588900 | 3.41152100  |
| F                                                    | -4.56378800 | -1.47838300 | 1.85665300  |
| F                                                    | -4.92401100 | 0.88500900  | 1.04591300  |
| F                                                    | -3.82704100 | 1.47084400  | 3.21714800  |
| F                                                    | -2.47018500 | 3.45655100  | 2.94364900  |
| F                                                    | -1.32750800 | 0.72388500  | 4.92109000  |
| O                                                    | -4.18804000 | 3.03781100  | -0.65464300 |
| H                                                    | -4.16308000 | 4.00961000  | -0.68553000 |
| C <sub>1</sub> -S <sub>N</sub> 2'-C41-F <sub>e</sub> |             |             |             |
| RC                                                   |             |             |             |
| C                                                    | -2.75992600 | -1.15693200 | -1.00372300 |
| C                                                    | -3.37611000 | 0.19583500  | -1.09934500 |



|   |             |             |             |
|---|-------------|-------------|-------------|
| C | -2.86694100 | 1.12161700  | -2.26495600 |
| C | -2.38515800 | 2.47548100  | -1.48565300 |
| C | -1.02599100 | 3.12125900  | -1.88163700 |
| C | -0.18246500 | 3.94119800  | -0.77506300 |
| C | 1.38977000  | 3.51874500  | -1.09399400 |
| C | 2.39825400  | 3.21223400  | 0.06022300  |
| C | 3.62724000  | 2.11638600  | -0.15407500 |
| C | 3.64910000  | 1.30330900  | 1.22891700  |
| C | 4.02392300  | -0.22846400 | 1.27031500  |
| C | 3.11168500  | -1.13120300 | 2.31285300  |
| C | 2.25629500  | -1.90030300 | 1.37253700  |
| C | 1.05091000  | -2.49497700 | 1.68042500  |
| C | 0.28013700  | -3.04831000 | 0.67553500  |
| C | -1.05922900 | -3.48823100 | 1.14508800  |
| C | -2.15506800 | -3.29728300 | 0.01277000  |
| C | -3.12030500 | -2.03507800 | 0.16529200  |
| C | -1.95825900 | -1.73818600 | -1.88958500 |
| C | -1.58335600 | -3.14622500 | -1.52272700 |
| C | -0.07496500 | -3.42754900 | -1.80502500 |
| C | 0.72341800  | -3.02500900 | -0.62465800 |
| C | 1.93265700  | -2.43724900 | -0.93588600 |
| C | 2.68202200  | -1.84517600 | 0.06018600  |
| C | 3.91701400  | -1.03610500 | -0.11506400 |
| C | 3.92127600  | -0.29797500 | -1.50364600 |
| C | 3.52996000  | 1.25878800  | -1.47561800 |
| C | 2.14831800  | 1.26497100  | -2.02196200 |
| C | 1.21025100  | 2.26343800  | -1.86674500 |
| C | -0.08502200 | 2.05471700  | -2.29024700 |
| C | -0.43670000 | 0.86839900  | -2.89038300 |
| C | -1.81571100 | 0.42902100  | -3.22723500 |
| C | -1.62295000 | -1.15516000 | -3.22422300 |
| C | -0.08997300 | -1.38703600 | -3.58294100 |
| C | 0.66881600  | -2.65031400 | -3.01188300 |
| C | 2.18224000  | -2.32506100 | -2.39539000 |
| C | 2.88073000  | -0.94198200 | -2.63090400 |
| C | 1.80846300  | 0.08586900  | -2.65726800 |
| C | 0.51122200  | -0.12011900 | -3.07923700 |
| C | -3.02615200 | 0.90198300  | 0.17347900  |
| C | -2.42373000 | 2.07193100  | -0.03450600 |
| C | -2.03134700 | 3.03477000  | 1.03624300  |
| C | -0.63471500 | 3.73402600  | 0.72607500  |
| C | 0.30685200  | 2.85449100  | 1.48000800  |
| C | 1.63192100  | 2.59626600  | 1.17669300  |
| C | 2.29877100  | 1.56014000  | 1.80325700  |

|   |             |             |             |
|---|-------------|-------------|-------------|
| C | 1.66384800  | 0.81850700  | 2.78174400  |
| C | 2.16918000  | -0.45689200 | 3.36273600  |
| C | 0.75895900  | -1.20294700 | 3.82601200  |
| C | 0.34799300  | -2.48038500 | 2.99153200  |
| C | -1.16205700 | -2.69381300 | 2.51808600  |
| C | -1.85996400 | -1.38905400 | 2.32112700  |
| C | -3.13689500 | -1.28908900 | 1.53869800  |
| C | -3.39410900 | 0.27924800  | 1.48959500  |
| C | -2.54350500 | 0.87392000  | 2.67081300  |
| C | -1.83141600 | 2.28368400  | 2.42048000  |
| C | -0.34181400 | 2.09928300  | 2.44181600  |
| C | 0.34672400  | 1.09175500  | 3.09801600  |
| C | -0.32976000 | -0.03665700 | 3.80272000  |
| C | -1.55318200 | -0.26044300 | 2.95913800  |
| F | -4.74871600 | 0.02327300  | -1.20946400 |
| F | -3.94610900 | 1.45746100  | -3.02622100 |
| F | -3.34907300 | 3.43960900  | -1.69783400 |
| F | -1.25823700 | 3.97113800  | -2.94036800 |
| F | -0.31606000 | 5.26066700  | -1.05716500 |
| F | 1.91540100  | 4.51282700  | -1.88150900 |
| F | 2.98166700  | 4.38991500  | 0.45501900  |
| F | 4.78962300  | 2.81431500  | -0.22617500 |
| F | 4.57078900  | 1.94130800  | 2.03590300  |
| F | 5.31610200  | -0.30681500 | 1.67949900  |
| F | 3.97664200  | -1.96232700 | 2.98079800  |
| F | -1.02101100 | -4.83190500 | 1.44480300  |
| F | -2.93555100 | -4.40907000 | 0.03992300  |
| F | -4.40831100 | -2.47551200 | -0.05586900 |
| F | -2.30947400 | -4.00577900 | -2.31340800 |
| F | 0.06431500  | -4.77744600 | -2.03524400 |
| F | 4.99141400  | -1.90325600 | -0.13877400 |
| F | 5.17942900  | -0.39081400 | -2.00304900 |
| F | 4.35285400  | 1.87903300  | -2.39463400 |
| F | -2.13093000 | 0.80421000  | -4.51338100 |
| F | -2.41474700 | -1.74074300 | -4.17561000 |
| F | 0.01285600  | -1.43498700 | -4.95515100 |
| F | 0.82196700  | -3.52684400 | -4.03425200 |
| F | 3.01265400  | -3.32039000 | -2.84344100 |
| F | 3.56301300  | -0.98875900 | -3.81966500 |
| F | -3.00093100 | 3.99177300  | 1.14427100  |
| F | -0.66263900 | 4.97871300  | 1.31520600  |
| F | 2.88815500  | -0.22428000 | 4.50838000  |
| F | 0.91369600  | -1.59347500 | 5.11665100  |
| F | 0.70917600  | -3.58503600 | 3.72931300  |

|    |                                 |             |                          |
|----|---------------------------------|-------------|--------------------------|
| F  | -1.85266500                     | -3.43795400 | 3.43733700               |
| F  | -4.13535200                     | -1.86493200 | 2.29466700               |
| F  | -4.72641400                     | 0.51129600  | 1.71201400               |
| F  | -3.36596200                     | 1.01646600  | 3.75803300               |
| F  | -2.23191700                     | 3.13543000  | 3.41857900               |
| F  | -0.70133800                     | 0.27580300  | 5.09254400               |
| H  | -5.52150300                     | 2.96408100  | -0.98775300              |
| O  | -5.57763900                     | 2.59718000  | -0.09318100              |
| H  | -6.12330700                     | 1.80385300  | -0.19530000              |
| TS | imaginary vibrational frequency |             | -801.06 cm <sup>-1</sup> |
| C  | -2.76425500                     | -1.27162900 | -0.96807600              |
| C  | -3.26210600                     | 0.10933900  | -1.10400800              |
| C  | -2.86747900                     | 0.92510600  | -2.36209200              |
| C  | -2.48803800                     | 2.41825200  | -1.73744900              |
| C  | -1.05132600                     | 2.96464500  | -2.08706700              |
| C  | -0.21293600                     | 3.86388800  | -1.05727100              |
| C  | 1.36246100                      | 3.42166600  | -1.33432600              |
| C  | 2.36572800                      | 3.20187100  | -0.15595700              |
| C  | 3.60145300                      | 2.09904800  | -0.28153300              |
| C  | 3.61444900                      | 1.38614300  | 1.15762500               |
| C  | 3.99226000                      | -0.13771000 | 1.31411000               |
| C  | 3.07182600                      | -0.96590400 | 2.41233700               |
| C  | 2.22218700                      | -1.79809700 | 1.52247100               |
| C  | 1.01293100                      | -2.36826900 | 1.86161400               |
| C  | 0.25186900                      | -2.99315600 | 0.89261900               |
| C  | -1.08776900                     | -3.40760200 | 1.38172200               |
| C  | -2.17218700                     | -3.30996700 | 0.22884400               |
| C  | -3.13265900                     | -2.03810200 | 0.27149300               |
| C  | -1.97407100                     | -1.92773600 | -1.80801800              |
| C  | -1.59004800                     | -3.29274100 | -1.31866500              |
| C  | -0.07171300                     | -3.56849500 | -1.55737800              |
| C  | 0.70781500                      | -3.06723900 | -0.40170300              |
| C  | 1.91970600                      | -2.50244800 | -0.74324900              |
| C  | 2.65961900                      | -1.83788700 | 0.21349600               |
| C  | 3.89614000                      | -1.04277000 | -0.00988900              |
| C  | 3.91039000                      | -0.40517400 | -1.44785300              |
| C  | 3.51256900                      | 1.14817300  | -1.53614700              |
| C  | 2.13082900                      | 1.10762700  | -2.08127700              |
| C  | 1.18236000                      | 2.10538500  | -1.99312000              |
| C  | -0.11574400                     | 1.85293600  | -2.38300100              |
| C  | -0.44538000                     | 0.63161700  | -2.91728700              |
| C  | -1.81009900                     | 0.17648500  | -3.26078200              |
| C  | -1.61966900                     | -1.41561500 | -3.16572900              |
| C  | -0.07732300                     | -1.65736400 | -3.47769900              |

|   |             |             |             |
|---|-------------|-------------|-------------|
| C | 0.67889600  | -2.87494600 | -2.81070300 |
| C | 2.18512600  | -2.49836700 | -2.20441800 |
| C | 2.88025500  | -1.13247700 | -2.53193000 |
| C | 1.80225900  | -0.11569400 | -2.63144300 |
| C | 0.50897800  | -0.35902000 | -3.04134300 |
| C | -2.74240600 | 0.85322200  | 0.06648000  |
| C | -2.80298700 | 2.27831300  | -0.20975100 |
| C | -2.11630100 | 3.20296400  | 0.83411300  |
| C | -0.66037000 | 3.76182700  | 0.44065700  |
| C | 0.25648800  | 2.90782300  | 1.24289700  |
| C | 1.59015700  | 2.65208100  | 0.98589100  |
| C | 2.25627200  | 1.67308500  | 1.69685800  |
| C | 1.61368900  | 1.00210100  | 2.72107600  |
| C | 2.12055200  | -0.22103700 | 3.40434200  |
| C | 0.70963300  | -0.93625100 | 3.91381200  |
| C | 0.30228700  | -2.26805900 | 3.16536000  |
| C | -1.20859700 | -2.52429400 | 2.70278300  |
| C | -1.91330600 | -1.23831700 | 2.42784900  |
| C | -3.15472900 | -1.14927800 | 1.56475300  |
| C | -3.16491400 | 0.38365300  | 1.31448700  |
| C | -2.56903100 | 1.05354800  | 2.55202300  |
| C | -1.87370400 | 2.44249500  | 2.24501900  |
| C | -0.39387200 | 2.23562200  | 2.25534700  |
| C | 0.29218600  | 1.28935200  | 3.00208500  |
| C | -0.37898200 | 0.22424400  | 3.80619000  |
| C | -1.60351000 | -0.06795400 | 2.99119000  |
| F | -4.68082900 | 0.05325900  | -1.09650400 |
| F | -3.97527800 | 1.11852300  | -3.13736600 |
| F | -3.38631800 | 3.31263500  | -2.28007700 |
| F | -1.20650900 | 3.71692400  | -3.23514500 |
| F | -0.35576000 | 5.15872800  | -1.43839000 |
| F | 1.88918400  | 4.34885300  | -2.19790200 |
| F | 2.93938200  | 4.40603600  | 0.16639200  |
| F | 4.76182900  | 2.79447400  | -0.39554900 |
| F | 4.52618000  | 2.08473200  | 1.92459200  |
| F | 5.28125600  | -0.18269400 | 1.73805000  |
| F | 3.93312800  | -1.74659700 | 3.14314900  |
| F | -1.03874900 | -4.72707400 | 1.77663500  |
| F | -2.95561100 | -4.41462500 | 0.34521300  |
| F | -4.42013200 | -2.49501200 | 0.09228400  |
| F | -2.28803100 | -4.24304100 | -2.02640900 |
| F | 0.09811800  | -4.92947800 | -1.68224000 |
| F | 4.97167200  | -1.90802700 | 0.03575700  |
| F | 5.17342900  | -0.52756200 | -1.92862800 |

|    |             |             |             |
|----|-------------|-------------|-------------|
| F  | 4.33562300  | 1.70287700  | -2.49620200 |
| F  | -2.09330200 | 0.48151000  | -4.57400500 |
| F  | -2.38403500 | -2.04727300 | -4.11013200 |
| F  | 0.06175600  | -1.79096900 | -4.84161100 |
| F  | 0.84615100  | -3.82108000 | -3.76710800 |
| F  | 3.02524600  | -3.51929500 | -2.56961600 |
| F  | 3.56862800  | -1.25675500 | -3.71177000 |
| F  | -2.89824600 | 4.29360600  | 1.05864000  |
| F  | -0.59542500 | 5.04297100  | 0.95214000  |
| F  | 2.83013400  | 0.10159200  | 4.53397200  |
| F  | 0.86027700  | -1.23838800 | 5.22856600  |
| F  | 0.66657100  | -3.31842400 | 3.97755000  |
| F  | -1.89330100 | -3.21957500 | 3.66437600  |
| F  | -4.23478200 | -1.53603900 | 2.32269700  |
| F  | -4.83158700 | 0.90266700  | 1.43713200  |
| F  | -3.49591200 | 1.24433500  | 3.54171100  |
| F  | -2.24040800 | 3.31753200  | 3.23845300  |
| F  | -0.73476900 | 0.64562000  | 5.06980300  |
| H  | -4.74920600 | 1.83467200  | 0.63889300  |
| O  | -4.34192700 | 2.67006700  | -0.04518000 |
| H  | -4.76672500 | 2.68661000  | -0.92580400 |
| PC |             |             |             |
| C  | -2.67951500 | -1.57441000 | -0.56046700 |
| C  | -3.48671400 | -0.32509700 | -0.44639500 |
| C  | -3.36142800 | 0.70288600  | -1.62183500 |
| C  | -3.08219100 | 2.17526200  | -0.88698500 |
| C  | -1.80141700 | 2.95196300  | -1.38844000 |
| C  | -0.90993900 | 3.84917300  | -0.40659800 |
| C  | 0.62867800  | 3.69813900  | -1.01724400 |
| C  | 1.86567500  | 3.50712700  | -0.08082300 |
| C  | 3.19168900  | 2.63884300  | -0.57893300 |
| C  | 3.58504000  | 1.77991700  | 0.72009300  |
| C  | 4.19215400  | 0.33007900  | 0.59002300  |
| C  | 3.63099200  | -0.75264600 | 1.71042000  |
| C  | 2.74071800  | -1.60398100 | 0.87986300  |
| C  | 1.71091500  | -2.39261000 | 1.34981200  |
| C  | 0.86162500  | -3.01602100 | 0.45613900  |
| C  | -0.28403100 | -3.69303700 | 1.11441700  |
| C  | -1.57978100 | -3.62914100 | 0.19703500  |
| C  | -2.67004500 | -2.54161600 | 0.59423500  |
| C  | -1.97930300 | -1.99157200 | -1.60876200 |
| C  | -1.32809700 | -3.33139200 | -1.40130700 |
| C  | 0.13114700  | -3.35099500 | -1.95044900 |
| C  | 1.05510700  | -2.87043400 | -0.89710200 |

|   |             |             |             |
|---|-------------|-------------|-------------|
| C | 2.08850700  | -2.08857700 | -1.37070000 |
| C | 2.90921700  | -1.42729200 | -0.47941200 |
| C | 3.95740000  | -0.42499400 | -0.80884200 |
| C | 3.59810700  | 0.36275900  | -2.12261200 |
| C | 2.98444000  | 1.83262500  | -1.91808100 |
| C | 1.54001100  | 1.63204500  | -2.20402100 |
| C | 0.50280800  | 2.44753900  | -1.80462100 |
| C | -0.80056900 | 2.03432600  | -1.97950500 |
| C | -1.06268900 | 0.84811700  | -2.61490600 |
| C | -2.39532700 | 0.22832500  | -2.77892300 |
| C | -1.97849900 | -1.30573900 | -2.93432700 |
| C | -0.51208900 | -1.27103800 | -3.55581200 |
| C | 0.51902800  | -2.41896500 | -3.21114900 |
| C | 2.05348900  | -1.87996500 | -2.84100700 |
| C | 2.47996200  | -0.39371400 | -3.09502800 |
| C | 1.27638600  | 0.44228900  | -2.85452300 |
| C | -0.02801900 | 0.04477600  | -3.05462600 |
| C | -3.06631400 | 0.38923100  | 0.80213100  |
| C | -3.22756800 | 1.88987900  | 0.69072200  |
| C | -2.30506600 | 2.70627200  | 1.69988000  |
| C | -1.03249200 | 3.50321400  | 1.11381700  |
| C | 0.12640800  | 2.70424300  | 1.59753700  |
| C | 1.40938700  | 2.70535900  | 1.08347300  |
| C | 2.33113800  | 1.77652100  | 1.52285700  |
| C | 2.00207900  | 0.90121200  | 2.54213800  |
| C | 2.80240400  | -0.28602800 | 2.95222700  |
| C | 1.63494900  | -1.27210800 | 3.60818400  |
| C | 1.27402400  | -2.56020700 | 2.76320900  |
| C | -0.24869400 | -3.00833500 | 2.55723800  |
| C | -1.16102700 | -1.83256700 | 2.60911200  |
| C | -2.52905800 | -1.81162500 | 1.96085000  |
| C | -2.72798000 | -0.30403700 | 1.88553500  |
| C | -2.09852000 | 0.30915700  | 3.10220700  |
| C | -1.67439600 | 1.80674000  | 2.90145100  |
| C | -0.21123900 | 1.82987600  | 2.60612000  |
| C | 0.73453600  | 0.93613600  | 3.08880500  |
| C | 0.39698500  | -0.29487200 | 3.86812700  |
| C | -0.92021400 | -0.69468100 | 3.27109800  |
| F | -4.83189600 | -0.69694000 | -0.34250100 |
| F | -4.60608000 | 0.80722800  | -2.21733800 |
| F | -4.14498800 | 2.95957400  | -1.23661700 |
| F | -2.23264100 | 3.79468300  | -2.39653200 |
| F | -1.29569500 | 5.13956300  | -0.56779500 |
| F | 0.84619000  | 4.78312500  | -1.82745700 |

|    |             |             |             |
|----|-------------|-------------|-------------|
| F  | 2.32344600  | 4.73996700  | 0.30942400  |
| F  | 4.20170000  | 3.51797800  | -0.79996700 |
| F  | 4.52289300  | 2.52579600  | 1.40602900  |
| F  | 5.53354600  | 0.44560400  | 0.76252400  |
| F  | 4.71832900  | -1.46266500 | 2.15517700  |
| F  | 0.01472700  | -5.02619800 | 1.28977000  |
| F  | -2.17227600 | -4.84895500 | 0.28571300  |
| F  | -3.89553600 | -3.17106800 | 0.59763500  |
| F  | -2.04015400 | -4.27156700 | -2.10857300 |
| F  | 0.43451400  | -4.65032400 | -2.28957500 |
| F  | 5.12724300  | -1.10695500 | -1.07940200 |
| F  | 4.74393500  | 0.49760300  | -2.83663100 |
| F  | 3.51490600  | 2.61564800  | -2.92370300 |
| F  | -2.95597900 | 0.62706400  | -3.97236600 |
| F  | -2.83050900 | -1.95781300 | -3.78398400 |
| F  | -0.64022500 | -1.23366100 | -4.92564800 |
| F  | 0.61570400  | -3.21763300 | -4.30175700 |
| F  | 2.93048600  | -2.70851100 | -3.49258900 |
| F  | 2.92963000  | -0.27579200 | -4.38479100 |
| F  | -3.08415600 | 3.65103500  | 2.28243200  |
| F  | -0.99191100 | 4.71378600  | 1.77893800  |
| F  | 3.67147600  | 0.02554800  | 3.96716500  |
| F  | 2.08890700  | -1.69237300 | 4.81579200  |
| F  | 1.94124000  | -3.62094800 | 3.33342900  |
| F  | -0.61529400 | -3.92055900 | 3.51056600  |
| F  | -3.43437500 | -2.38083400 | 2.84097700  |
| F  | -6.56399400 | 1.40591200  | -0.48898500 |
| F  | -2.93625600 | 0.22386300  | 4.19214600  |
| F  | -1.92437100 | 2.46509800  | 4.08088700  |
| F  | 0.26954800  | -0.05962600 | 5.21938100  |
| H  | -6.12501800 | 1.00243000  | -1.21874000 |
| O  | -4.52310300 | 2.21156500  | 1.10824400  |
| H  | -5.21558700 | 1.87720200  | 0.49486900  |
| IP |             |             |             |
| C  | -3.02359500 | -0.94612400 | -0.68444900 |
| C  | -3.52798900 | 0.45674100  | -0.65012200 |
| C  | -3.13943500 | 1.38729900  | -1.85088900 |
| C  | -2.56737700 | 2.78873000  | -1.14216000 |
| C  | -1.13000200 | 3.25346600  | -1.59327300 |
| C  | -0.11669400 | 3.97555000  | -0.58720500 |
| C  | 1.37987000  | 3.47133100  | -1.10401900 |
| C  | 2.49627600  | 3.05652700  | -0.09288400 |
| C  | 3.62429400  | 1.90324900  | -0.48842600 |
| C  | 3.75579800  | 1.03368800  | 0.85526900  |

|   |             |             |             |
|---|-------------|-------------|-------------|
| C | 4.04064100  | -0.51631400 | 0.80297900  |
| C | 3.20461500  | -1.40625700 | 1.92183300  |
| C | 2.19307400  | -2.08139400 | 1.06811900  |
| C | 0.99472000  | -2.61033100 | 1.50165000  |
| C | 0.07403100  | -3.06969100 | 0.57961100  |
| C | -1.22249700 | -3.45729000 | 1.18997000  |
| C | -2.42746100 | -3.15372500 | 0.19794500  |
| C | -3.27460500 | -1.84275900 | 0.50061700  |
| C | -2.37766600 | -1.54597800 | -1.67787100 |
| C | -2.03959000 | -2.98369700 | -1.39233900 |
| C | -0.59273000 | -3.33701800 | -1.85429000 |
| C | 0.35961500  | -3.02251600 | -0.76419700 |
| C | 1.55979100  | -2.50126300 | -1.20084800 |
| C | 2.46137700  | -1.99939600 | -0.28412300 |
| C | 3.71695400  | -1.26100800 | -0.58366200 |
| C | 3.60212000  | -0.46863400 | -1.93870300 |
| C | 3.31402300  | 1.10576000  | -1.81281600 |
| C | 1.87697300  | 1.21033100  | -2.17565800 |
| C | 1.02439100  | 2.24717900  | -1.86245800 |
| C | -0.32700600 | 2.11901800  | -2.10252900 |
| C | -0.81257600 | 0.99173500  | -2.71491700 |
| C | -2.24050100 | 0.66721200  | -2.93385600 |
| C | -2.15862900 | -0.92754600 | -3.01953900 |
| C | -0.68951200 | -1.23513600 | -3.55421600 |
| C | 0.04990100  | -2.56287200 | -3.11752300 |
| C | 1.64368500  | -2.35235000 | -2.67643100 |
| C | 2.39528000  | -1.00545800 | -2.94995100 |
| C | 1.39187300  | 0.07969400  | -2.80347100 |
| C | 0.04347600  | -0.03427100 | -3.06692000 |
| C | -3.00267100 | 1.10206000  | 0.59396300  |
| C | -2.83656000 | 2.59030600  | 0.42679300  |
| C | -1.83551600 | 3.24220100  | 1.46548200  |
| C | -0.39174000 | 3.72709300  | 0.93361900  |
| C | 0.54200900  | 2.71924000  | 1.50725100  |
| C | 1.81785500  | 2.42135100  | 1.06632400  |
| C | 2.49221500  | 1.33347500  | 1.58365700  |
| C | 1.93235700  | 0.59260100  | 2.60851100  |
| C | 2.43585400  | -0.72051300 | 3.09920900  |
| C | 1.05238200  | -1.40475500 | 3.71697500  |
| C | 0.46274100  | -2.62058700 | 2.89224500  |
| C | -1.10930800 | -2.73943000 | 2.61341200  |
| C | -1.74615800 | -1.39402600 | 2.58137800  |
| C | -3.04101600 | -1.10412100 | 1.85140400  |
| C | -2.89474000 | 0.40404900  | 1.71946500  |



|   |             |             |             |
|---|-------------|-------------|-------------|
| C | -2.21775400 | 0.91925300  | 2.95419900  |
| C | -1.47233700 | 2.28235000  | 2.73153400  |
| C | -0.02611300 | 1.97889200  | 2.51988600  |
| C | 0.67770900  | 0.92242300  | 3.08175600  |
| C | 0.04530500  | -0.17453200 | 3.87834300  |
| C | -1.29678400 | -0.30784600 | 3.22234700  |
| F | -4.92472000 | 0.42479400  | -0.57167500 |
| F | -4.29512400 | 1.74287300  | -2.48282100 |
| F | -3.41344200 | 3.77663100  | -1.55714000 |
| F | -1.31953700 | 4.13078000  | -2.64488000 |
| F | -0.20348700 | 5.31181900  | -0.80574400 |
| F | 1.86869100  | 4.45158800  | -1.92955600 |
| F | 3.19146400  | 4.17617700  | 0.28787400  |
| F | 4.81118500  | 2.53422800  | -0.67624900 |
| F | 4.79664600  | 1.58794100  | 1.57384600  |
| F | 5.36545200  | -0.68327800 | 1.04752300  |
| F | 4.08981500  | -2.31261500 | 2.45025800  |
| F | -1.22976900 | -4.81540700 | 1.42057000  |
| F | -3.27361800 | -4.21331500 | 0.28969100  |
| F | -4.60620500 | -2.19445800 | 0.46116300  |
| F | -2.89918600 | -3.78195400 | -2.10977400 |
| F | -0.55901600 | -4.68446700 | -2.13540600 |
| F | 4.72272100  | -2.18916700 | -0.76680600 |
| F | 4.78348900  | -0.61448300 | -2.59003300 |
| F | 4.05299800  | 1.71326000  | -2.80831200 |
| F | -2.64286900 | 1.12523800  | -4.16843900 |
| F | -3.08504100 | -1.41681900 | -3.89992700 |
| F | -0.73604600 | -1.22881000 | -4.92992600 |
| F | 0.02422200  | -3.40830000 | -4.17642100 |
| F | 2.35099000  | -3.37855800 | -3.24891400 |
| F | 2.92330600  | -1.04123400 | -4.21475400 |
| F | -2.43781800 | 4.35160700  | 1.96454600  |
| F | -0.13314900 | 4.92742800  | 1.56729000  |
| F | 3.30014500  | -0.55948500 | 4.15257000  |
| F | 1.34509100  | -1.86199000 | 4.96060900  |
| F | 0.85526600  | -3.77385400 | 3.53316000  |
| F | -1.71061200 | -3.51298500 | 3.57020600  |
| F | -4.09346100 | -1.41785100 | 2.69559200  |
| F | -3.11295600 | 1.06307600  | 3.99124100  |
| F | -1.63505600 | 3.03270000  | 3.87034200  |
| F | -0.09173400 | 0.13913400  | 5.21278700  |
| O | -4.08500700 | 3.17635500  | 0.74295300  |
| H | -4.76349300 | 2.81117800  | 0.14795900  |

C<sub>1</sub>- S<sub>N</sub>2'-C1-F<sub>j</sub>

RC

|   |             |             |             |
|---|-------------|-------------|-------------|
| C | -3.10729200 | -0.45472700 | -0.39845000 |
| C | -3.37623700 | 1.00749600  | -0.50907500 |
| C | -2.88759400 | 1.71560900  | -1.82616100 |
| C | -1.96732100 | 2.95293600  | -1.26349400 |
| C | -0.59381300 | 3.23272500  | -1.93441200 |
| C | 0.60248200  | 3.87749200  | -1.05838800 |
| C | 1.94947500  | 3.06953800  | -1.58601000 |
| C | 3.05277600  | 2.58981600  | -0.58617800 |
| C | 3.93895000  | 1.21932300  | -0.89168700 |
| C | 4.02240300  | 0.49872600  | 0.53989700  |
| C | 4.03552800  | -1.07404900 | 0.66449000  |
| C | 3.14253600  | -1.67276500 | 1.92129400  |
| C | 1.97824400  | -2.25879200 | 1.20848700  |
| C | 0.74340200  | -2.52730800 | 1.76109300  |
| C | -0.30247600 | -2.92605400 | 0.95020700  |
| C | -1.60125300 | -3.00514700 | 1.66763800  |
| C | -2.81171900 | -2.61562200 | 0.71443600  |
| C | -3.42495300 | -1.15174100 | 0.89990800  |
| C | -2.62630400 | -1.26065900 | -1.34072000 |
| C | -2.50881400 | -2.69296200 | -0.90117200 |
| C | -1.17306000 | -3.33993900 | -1.39292400 |
| C | -0.10576900 | -3.07931000 | -0.40047900 |
| C | 1.13094700  | -2.82125400 | -0.95580300 |
| C | 2.16261800  | -2.37714300 | -0.15455300 |
| C | 3.49848500  | -1.90289400 | -0.60311600 |
| C | 3.42310800  | -1.26081900 | -2.03701700 |
| C | 3.41096900  | 0.34344400  | -2.09266000 |
| C | 1.99215500  | 0.65563100  | -2.40449700 |
| C | 1.34929000  | 1.85764000  | -2.19856900 |
| C | -0.01430800 | 1.94835000  | -2.38954200 |
| C | -0.73259300 | 0.85042500  | -2.80663800 |
| C | -2.21636600 | 0.73335700  | -2.87524200 |
| C | -2.38845000 | -0.85264600 | -2.76035600 |
| C | -1.02835700 | -1.45667700 | -3.32302100 |
| C | -0.49516900 | -2.83364600 | -2.77039300 |
| C | 1.13602400  | -2.85221700 | -2.43986900 |
| C | 2.07712900  | -1.69236300 | -2.91331700 |
| C | 1.28274100  | -0.43838700 | -2.85888600 |
| C | -0.08062400 | -0.34589000 | -3.04226300 |
| C | -2.61991700 | 1.65428000  | 0.61146700  |
| C | -1.82707000 | 2.64297600  | 0.20346100  |
| C | -1.04342300 | 3.53727400  | 1.10474300  |
| C | 0.39387300  | 3.86605300  | 0.51032100  |

|   |             |             |             |
|---|-------------|-------------|-------------|
| C | 1.22889600  | 2.82705300  | 1.18344500  |
| C | 2.38190900  | 2.23940500  | 0.69479300  |
| C | 2.89388300  | 1.10633600  | 1.29941500  |
| C | 2.29243900  | 0.59241900  | 2.43325800  |
| C | 2.58494700  | -0.73630200 | 3.04167400  |
| C | 1.14718700  | -1.09317100 | 3.79421800  |
| C | 0.30936900  | -2.27484600 | 3.16107400  |
| C | -1.27023100 | -2.14081900 | 2.96025300  |
| C | -1.67284400 | -0.71890200 | 2.75636700  |
| C | -3.01130400 | -0.34983100 | 2.18182000  |
| C | -2.89085000 | 1.22286200  | 2.02226900  |
| C | -1.73705800 | 1.65552100  | 2.99461400  |
| C | -0.77874000 | 2.83698000  | 2.50413000  |
| C | 0.60833100  | 2.30157700  | 2.30412800  |
| C | 1.15167100  | 1.19214900  | 2.93143300  |
| C | 0.37026500  | 0.29884100  | 3.83683500  |
| C | -1.00181100 | 0.33243200  | 3.22557600  |
| F | -4.72492600 | 1.24865300  | -0.31032800 |
| F | -3.96595700 | 2.28463000  | -2.43304600 |
| F | -2.71425200 | 4.10379600  | -1.37690100 |
| F | -0.81323800 | 4.06227600  | -3.01128200 |
| F | 0.72966400  | 5.17392900  | -1.43523200 |
| F | 2.54016700  | 3.86311300  | -2.53813100 |
| F | 3.95141400  | 3.61161500  | -0.40691100 |
| F | 5.19793600  | 1.61088600  | -1.21589000 |
| F | 5.19597600  | 0.93562500  | 1.12267600  |
| F | 5.32705600  | -1.44208700 | 0.86402900  |
| F | 3.89936400  | -2.65211800 | 2.51558100  |
| F | -1.81630400 | -4.30108100 | 2.08154300  |
| F | -3.80504300 | -3.50438200 | 0.97629300  |
| F | -4.79414300 | -1.28292400 | 0.95391300  |
| F | -3.53292300 | -3.40815000 | -1.47345300 |
| F | -1.38434900 | -4.69509300 | -1.51273200 |
| F | 4.32178600  | -3.00541500 | -0.71987300 |
| F | 4.51607200  | -1.68158100 | -2.72241100 |
| F | 4.17410100  | 0.69703800  | -3.18788300 |
| F | -2.66536500 | 1.10543600  | -4.12412900 |
| F | -3.40499500 | -1.30788400 | -3.55542800 |
| F | -1.17152300 | -1.59596300 | -4.68693200 |
| F | -0.73358600 | -3.77356100 | -3.71764600 |
| F | 1.62520200  | -4.04039800 | -2.91973400 |
| F | 2.50397300  | -1.96197400 | -4.18860600 |
| F | -1.74372900 | 4.70225100  | 1.27897200  |
| F | 0.75306600  | 5.11135400  | 0.97665300  |

|    |                                 |             |                          |
|----|---------------------------------|-------------|--------------------------|
| F  | 3.53077100                      | -0.62585000 | 4.02994300               |
| F  | 1.43621100                      | -1.44093800 | 5.07400600               |
| F  | 0.53366100                      | -3.39320500 | 3.93172900               |
| F  | -1.93559700                     | -2.64529400 | 4.04553100               |
| F  | -3.96270100                     | -0.61165500 | 3.14392800               |
| F  | -4.06863900                     | 1.81098700  | 2.41000800               |
| F  | -2.30400200                     | 2.05240300  | 4.17859000               |
| F  | -0.79425600                     | 3.81468500  | 3.46728700               |
| F  | 0.31449900                      | 0.76036700  | 5.13453600               |
| H  | -5.94968600                     | 0.76503200  | -2.32525300              |
| O  | -5.56416100                     | -0.09912300 | -2.52866200              |
| H  | -5.45343400                     | -0.09813300 | -3.49056000              |
| TS | imaginary vibrational frequency |             | -741.72 cm <sup>-1</sup> |
| C  | -3.43759000                     | -0.23025200 | -0.82710700              |
| C  | -3.35233900                     | 1.29556700  | -0.76147300              |
| C  | -2.61004800                     | 2.04145500  | -1.96506700              |
| C  | -1.68543000                     | 3.15326800  | -1.21521700              |
| C  | -0.23487500                     | 3.42165700  | -1.73364600              |
| C  | 0.90491400                      | 3.91818200  | -0.69719200              |
| C  | 2.26202400                      | 3.08192300  | -1.16770000              |
| C  | 3.23268200                      | 2.45004700  | -0.11609200              |
| C  | 4.06800100                      | 1.05474100  | -0.45666700              |
| C  | 3.97377500                      | 0.21735800  | 0.90864200               |
| C  | 3.88783800                      | -1.35906300 | 0.89970100               |
| C  | 2.85555300                      | -2.00072900 | 2.01869500               |
| C  | 1.73745200                      | -2.47596100 | 1.16286100               |
| C  | 0.44807100                      | -2.72883200 | 1.58461600               |
| C  | -0.53572500                     | -3.02320900 | 0.65851300               |
| C  | -1.90107900                     | -3.02213700 | 1.25367100               |
| C  | -2.97503200                     | -2.45575900 | 0.21337500               |
| C  | -3.66682800                     | -1.02720900 | 0.51088200               |
| C  | -2.32900500                     | -0.87070600 | -1.51236500              |
| C  | -2.38759600                     | -2.24205600 | -1.24134600              |
| C  | -1.24261200                     | -3.10080800 | -1.78451400              |
| C  | -0.22934200                     | -3.08340600 | -0.68374500              |
| C  | 1.06146500                      | -2.82818900 | -1.10693400              |
| C  | 2.03621000                      | -2.49772900 | -0.18461400              |
| C  | 3.42758300                      | -2.05372800 | -0.47357000              |
| C  | 3.52152700                      | -1.29373000 | -1.84657800              |
| C  | 3.61271900                      | 0.31011100  | -1.77057200              |
| C  | 2.25685800                      | 0.74461000  | -2.19460300              |
| C  | 1.66969300                      | 1.96824600  | -1.94906600              |
| C  | 0.33841100                      | 2.16214600  | -2.25963100              |
| C  | -0.38706100                     | 1.15105800  | -2.83301100              |

|   |             |             |             |
|---|-------------|-------------|-------------|
| C | -1.86077000 | 1.10941600  | -2.99663100 |
| C | -2.09101900 | -0.43796500 | -2.91493400 |
| C | -0.79758400 | -1.09331200 | -3.51549700 |
| C | -0.39305000 | -2.53913700 | -3.04027800 |
| C | 1.19399100  | -2.70001200 | -2.58019700 |
| C | 2.24482600  | -1.56775500 | -2.86985300 |
| C | 1.53367800  | -0.26552800 | -2.80399700 |
| C | 0.20835000  | -0.06693000 | -3.11462600 |
| C | -2.57248800 | 1.71721400  | 0.45712800  |
| C | -1.69455800 | 2.69070500  | 0.21378400  |
| C | -0.96056700 | 3.47560000  | 1.25534800  |
| C | 0.54053600  | 3.78458100  | 0.83399900  |
| C | 1.26133400  | 2.65493300  | 1.49267100  |
| C | 2.42255000  | 2.03917800  | 1.06157700  |
| C | 2.81424600  | 0.83274200  | 1.61193300  |
| C | 2.08377600  | 0.26902600  | 2.64034800  |
| C | 2.24690800  | -1.11923900 | 3.15651900  |
| C | 0.73259200  | -1.44578500 | 3.74670400  |
| C | -0.10337000 | -2.52657400 | 2.95297200  |
| C | -1.64070900 | -2.26909400 | 2.61645800  |
| C | -1.94339300 | -0.81774300 | 2.47467000  |
| C | -3.21747700 | -0.31786500 | 1.84988100  |
| C | -2.99127700 | 1.23343000  | 1.80833200  |
| C | -1.91718000 | 1.52315500  | 2.91565200  |
| C | -0.86113800 | 2.67621200  | 2.61681500  |
| C | 0.51251700  | 2.08229400  | 2.50667800  |
| C | 0.93658500  | 0.89708800  | 3.08524300  |
| C | 0.02622900  | -0.01778000 | 3.83374700  |
| C | -1.27307400 | 0.14866400  | 3.09879700  |
| F | -4.63126700 | 1.80967600  | -0.65905100 |
| F | -3.57227400 | 2.70702600  | -2.66577000 |
| F | -2.36196800 | 4.35081600  | -1.27484800 |
| F | -0.32248300 | 4.36227300  | -2.73488700 |
| F | 1.13189200  | 5.23224100  | -0.94226600 |
| F | 2.98387400  | 3.92616600  | -1.97459800 |
| F | 4.16541000  | 3.39287600  | 0.23810100  |
| F | 5.37171100  | 1.39315000  | -0.62812700 |
| F | 5.10840700  | 0.53087600  | 1.63162100  |
| F | 5.13502800  | -1.81862600 | 1.17918800  |
| F | 3.50792200  | -3.06005900 | 2.60099500  |
| F | -2.27100500 | -4.31096000 | 1.56176800  |
| F | -3.97783500 | -3.37449000 | 0.20950300  |
| F | -5.00408700 | -1.25846900 | 0.66002400  |
| F | -3.81378900 | -2.77022700 | -2.13869200 |

|    |             |             |             |
|----|-------------|-------------|-------------|
| F  | -1.66406600 | -4.37333500 | -2.06865100 |
| F  | 4.20621800  | -3.18679900 | -0.60918000 |
| F  | 4.64783500  | -1.73003500 | -2.46657400 |
| F  | 4.50658700  | 0.68919500  | -2.75298900 |
| F  | -2.20176600 | 1.54591200  | -4.26041200 |
| F  | -3.18944100 | -0.73528000 | -3.74894800 |
| F  | -0.91185100 | -1.12266900 | -4.88828100 |
| F  | -0.60118300 | -3.38496500 | -4.07984700 |
| F  | 1.65182500  | -3.86670100 | -3.14131500 |
| F  | 2.77560000  | -1.78107500 | -4.11740800 |
| F  | -1.63385000 | 4.65502700  | 1.44344400  |
| F  | 0.89394600  | 4.96826700  | 1.44376200  |
| F  | 3.10340000  | -1.14221900 | 4.22936600  |
| F  | 0.88397000  | -1.90262300 | 5.01627200  |
| F  | -0.03188300 | -3.70272600 | 3.66542200  |
| F  | -2.44042800 | -2.79210700 | 3.59968000  |
| F  | -4.21931300 | -0.56318500 | 2.76793600  |
| F  | -4.16619400 | 1.87427700  | 2.12028300  |
| F  | -2.58012000 | 1.85617300  | 4.06934200  |
| F  | -0.92667700 | 3.58622800  | 3.64205800  |
| F  | -0.13673100 | 0.34102600  | 5.15460100  |
| H  | -4.48984200 | -1.69138400 | -1.93316100 |
| O  | -4.76199100 | -0.62715000 | -1.65393900 |
| H  | -4.71700800 | -0.15157400 | -2.50995000 |
| PC |             |             |             |
| C  | 3.68259200  | 0.53420100  | -0.41102000 |
| C  | 3.40652700  | -0.84596800 | -1.06479900 |
| C  | 2.79059900  | -0.86968900 | -2.52854600 |
| C  | 1.81972300  | -2.18825300 | -2.49122000 |
| C  | 0.41538000  | -2.12660000 | -3.16224200 |
| C  | -0.78603500 | -3.05083600 | -2.59106300 |
| C  | -2.11433200 | -2.05989300 | -2.66619400 |
| C  | -3.17131200 | -2.02226000 | -1.51182700 |
| C  | -4.00334400 | -0.62588400 | -1.16495200 |
| C  | -4.01968900 | -0.58427600 | 0.43867600  |
| C  | -3.96403300 | 0.78423500  | 1.22522800  |
| C  | -3.02125700 | 0.76724200  | 2.58393700  |
| C  | -1.86394100 | 1.60415600  | 2.16806700  |
| C  | -0.60890300 | 1.59761800  | 2.75098300  |
| C  | 0.42574100  | 2.30733300  | 2.16874400  |
| C  | 1.77000600  | 1.94967900  | 2.72750300  |
| C  | 2.86248400  | 1.92189200  | 1.55092600  |
| C  | 3.63236400  | 0.55794200  | 1.20767600  |
| C  | 2.68743000  | 1.58836000  | -0.81456000 |

|   |             |             |             |
|---|-------------|-------------|-------------|
| C | 2.28136300  | 2.34889700  | 0.19810100  |
| C | 1.27634000  | 3.46502500  | 0.09827600  |
| C | 0.19060200  | 3.02774600  | 1.01353700  |
| C | -1.05846300 | 3.03698400  | 0.42696100  |
| C | -2.08071600 | 2.30057900  | 0.99456100  |
| C | -3.43275400 | 2.06618300  | 0.41706100  |
| C | -3.40635900 | 2.08865700  | -1.15777700 |
| C | -3.46295200 | 0.66271600  | -1.89240000 |
| C | -2.06574500 | 0.47114600  | -2.35839400 |
| C | -1.47785900 | -0.72092800 | -2.72334700 |
| C | -0.12688300 | -0.75973000 | -2.99608500 |
| C | 0.62842200  | 0.38602200  | -2.92382800 |
| C | 2.10729300  | 0.47238200  | -3.01841200 |
| C | 2.38283000  | 1.84383800  | -2.25954900 |
| C | 1.03053900  | 2.68718000  | -2.42873300 |
| C | 0.54985500  | 3.68575400  | -1.30359800 |
| C | -1.07464000 | 3.63764500  | -0.93454800 |
| C | -2.06505500 | 2.80757300  | -1.81360200 |
| C | -1.31749800 | 1.63132700  | -2.32544500 |
| C | 0.03517100  | 1.58997000  | -2.59614400 |
| C | 2.53963400  | -1.76907000 | -0.26716600 |
| C | 1.71015400  | -2.48885600 | -1.02208000 |
| C | 0.92943800  | -3.67683900 | -0.55788900 |
| C | -0.53291900 | -3.70727700 | -1.17546800 |
| C | -1.31450200 | -3.04165100 | -0.08994300 |
| C | -2.45418800 | -2.27108000 | -0.23273100 |
| C | -2.89899400 | -1.48852600 | 0.81714800  |
| C | -2.24653300 | -1.52210400 | 2.03447600  |
| C | -2.46707700 | -0.57427700 | 3.16268600  |
| C | -1.00106100 | -0.61017500 | 3.93406400  |
| C | -0.13271100 | 0.70872200  | 3.84857000  |
| C | 1.42730800  | 0.62471900  | 3.51485200  |
| C | 1.76568400  | -0.56665600 | 2.68775500  |
| C | 3.09169400  | -0.71609100 | 1.98193400  |
| C | 2.87723500  | -2.03552800 | 1.16397900  |
| C | 1.74372000  | -2.81749700 | 1.91020200  |
| C | 0.72999300  | -3.65491200 | 1.01150800  |
| C | -0.64306200 | -3.06093900 | 1.12106900  |
| C | -1.12171800 | -2.31040300 | 2.18262400  |
| C | -0.27584900 | -1.90233500 | 3.34263300  |
| C | 1.06860300  | -1.70118700 | 2.70469000  |
| F | 4.65422100  | -1.47765800 | -1.13487800 |
| F | 3.80247000  | -1.13537200 | -3.39698000 |
| F | 2.51135700  | -3.21887000 | -3.08490300 |

|    |             |             |             |
|----|-------------|-------------|-------------|
| F  | 0.57109400  | -2.42627600 | -4.49586400 |
| F  | -0.97857300 | -4.06165100 | -3.47381900 |
| F  | -2.76202800 | -2.35451000 | -3.84012000 |
| F  | -4.10993000 | -2.99514800 | -1.74728800 |
| F  | -5.28571100 | -0.80167200 | -1.57470800 |
| F  | -5.19472400 | -1.19782000 | 0.82738200  |
| F  | -5.23555900 | 1.06035100  | 1.61429800  |
| F  | -3.73976200 | 1.39480000  | 3.57238300  |
| F  | 2.17124500  | 2.88850100  | 3.64689800  |
| F  | 3.81689100  | 2.84533300  | 1.90060300  |
| F  | 4.92612500  | 0.70901500  | 1.61875300  |
| F  | 3.50949400  | 4.68207500  | -1.46296000 |
| F  | 1.83356500  | 4.66963800  | 0.53277000  |
| F  | -4.23613100 | 3.12248000  | 0.79978400  |
| F  | -4.49315900 | 2.79399800  | -1.56275400 |
| F  | -4.26100800 | 0.83556200  | -3.00622700 |
| F  | 2.46729600  | 0.64447300  | -4.33672900 |
| F  | 3.42509900  | 2.47513200  | -2.86420000 |
| F  | 1.13008400  | 3.40700400  | -3.59579700 |
| F  | 0.81600800  | 4.95030700  | -1.72170200 |
| F  | -1.51078100 | 4.93853100  | -0.89277600 |
| F  | -2.50385700 | 3.60292500  | -2.84251700 |
| F  | 1.61090400  | -4.80456900 | -0.93608500 |
| F  | -0.91038000 | -5.02870100 | -1.26401200 |
| F  | -3.38994000 | -1.07876900 | 4.04529700  |
| F  | -1.24463400 | -0.84696200 | 5.24870300  |
| F  | -0.25428600 | 1.35755300  | 5.05687400  |
| F  | 2.15663500  | 0.57196400  | 4.67465700  |
| F  | 4.01875300  | -0.99741400 | 2.96770300  |
| F  | 4.03593800  | -2.77576200 | 1.17798500  |
| F  | 2.33417800  | -3.68912600 | 2.78954500  |
| F  | 0.74424300  | -4.95356600 | 1.45511500  |
| F  | -0.18728500 | -2.87273000 | 4.31730800  |
| O  | 4.91690300  | 1.01304700  | -0.86392900 |
| H  | 5.56036400  | 0.28440300  | -0.80988900 |
| H  | 3.07371300  | 5.19759900  | -0.81351600 |
| IP |             |             |             |
| C  | 3.54327400  | -0.13647300 | 1.36311400  |
| C  | 3.48934000  | 1.14906000  | 0.49793000  |
| C  | 2.82150700  | 2.44532100  | 1.12976400  |
| C  | 2.09598800  | 3.14290400  | -0.16376000 |
| C  | 0.67470100  | 3.76193000  | -0.00793500 |
| C  | -0.32220800 | 3.80928400  | -1.28430100 |
| C  | -1.80437400 | 3.43358200  | -0.64045700 |



|   |             |             |             |
|---|-------------|-------------|-------------|
| C | -2.79928300 | 2.47978000  | -1.38447900 |
| C | -3.84555200 | 1.50817700  | -0.53376200 |
| C | -3.79671500 | 0.11443600  | -1.32680800 |
| C | -3.94289200 | -1.26674500 | -0.57374600 |
| C | -2.95242700 | -2.46953600 | -1.12610500 |
| C | -1.97825200 | -2.60636100 | -0.01043100 |
| C | -0.71827400 | -3.17098900 | -0.10005800 |
| C | 0.14852100  | -3.10149500 | 0.97647800  |
| C | 1.56007000  | -3.45694100 | 0.61103200  |
| C | 2.58347100  | -2.48664900 | 1.37702700  |
| C | 3.56424300  | -1.53143700 | 0.54161700  |
| C | 2.35599800  | -0.28014200 | 2.27383800  |
| C | 1.86752400  | -1.51513500 | 2.32037000  |
| C | 0.69846600  | -1.95997200 | 3.15927700  |
| C | -0.25958000 | -2.47750800 | 2.14169100  |
| C | -1.51366000 | -1.90478800 | 2.23209700  |
| C | -2.36397400 | -1.95114000 | 1.14314800  |
| C | -3.67788400 | -1.26238600 | 1.00979600  |
| C | -3.72690800 | 0.07276900  | 1.84314700  |
| C | -3.56983500 | 1.43972900  | 1.01496100  |
| C | -2.18312700 | 1.86666700  | 1.33360000  |
| C | -1.41319200 | 2.76358700  | 0.62413600  |
| C | -0.08911100 | 2.94867000  | 0.96446900  |
| C | 0.45845600  | 2.25805100  | 2.01938300  |
| C | 1.89638200  | 2.20873700  | 2.39593300  |
| C | 1.94854900  | 0.83086100  | 3.18822500  |
| C | 0.46899300  | 0.62118400  | 3.75205600  |
| C | -0.12160800 | -0.82919900 | 3.93295800  |
| C | -1.69281700 | -1.03899100 | 3.43067100  |
| C | -2.56184600 | 0.19306500  | 3.01271400  |
| C | -1.64714700 | 1.19997400  | 2.41698800  |
| C | -0.32331800 | 1.38721600  | 2.75389000  |
| C | 2.83225300  | 0.98757800  | -0.83729600 |
| C | 2.10527400  | 2.04623800  | -1.19283300 |
| C | 1.56379600  | 2.30095900  | -2.56343600 |
| C | 0.10346000  | 2.92180400  | -2.52122100 |
| C | -0.73286400 | 1.69070100  | -2.65474000 |
| C | -1.99366500 | 1.47557500  | -2.12867400 |
| C | -2.52091700 | 0.19778800  | -2.08955600 |
| C | -1.81956800 | -0.86086100 | -2.63356500 |
| C | -2.15089100 | -2.30263800 | -2.45626500 |
| C | -0.66953800 | -3.02122600 | -2.63335700 |
| C | -0.04779400 | -3.67279800 | -1.33318900 |
| C | 1.48571600  | -3.42498700 | -0.96599400 |

|   |             |             |             |
|---|-------------|-------------|-------------|
| C | 1.98851800  | -2.12080900 | -1.48152400 |
| C | 3.28853100  | -1.50995200 | -1.01819500 |
| C | 3.27185200  | -0.11920100 | -1.74033900 |
| C | 2.32491000  | -0.29617500 | -2.97550800 |
| C | 1.43299400  | 0.95700400  | -3.38814300 |
| C | -0.01576500 | 0.62903400  | -3.18036000 |
| C | -0.57002400 | -0.64072700 | -3.18017300 |
| C | 0.24207800  | -1.88802900 | -3.29052600 |
| C | 1.50141100  | -1.51539700 | -2.56292300 |
| F | 4.82394500  | 1.46795100  | 0.22182300  |
| F | 3.82349700  | 3.27363900  | 1.52744700  |
| F | 2.93097900  | 4.14404300  | -0.60391800 |
| F | 0.82415700  | 5.05032100  | 0.45059700  |
| F | -0.37573100 | 5.09480300  | -1.71154500 |
| F | -2.44301300 | 4.62395400  | -0.39633600 |
| F | -3.56342800 | 3.23065100  | -2.24208700 |
| F | -5.09451200 | 2.01668300  | -0.69085900 |
| F | -4.82938800 | 0.15820900  | -2.24299900 |
| F | -5.22468200 | -1.67583600 | -0.75980400 |
| F | -3.72430100 | -3.60103600 | -1.23230700 |
| F | 1.84578800  | -4.74561100 | 0.98895400  |
| F | 3.37689500  | -3.30173500 | 2.14521400  |
| F | 4.83014000  | -2.02660800 | 0.68036400  |
| F | 1.10767600  | -2.92427900 | 4.05523400  |
| F | -4.63554100 | -2.09054900 | 1.56219500  |
| F | -4.93694400 | 0.11297500  | 2.45729700  |
| F | -4.43473200 | 2.34430400  | 1.59867000  |
| F | 2.17254900  | 3.21818900  | 3.29056800  |
| F | 2.83203300  | 0.92133100  | 4.22756600  |
| F | 0.40268600  | 1.24635100  | 4.97737100  |
| F | -0.07898200 | -1.12540900 | 5.25681200  |
| F | -2.34379000 | -1.71239500 | 4.43356700  |
| F | -3.17643800 | 0.69018900  | 4.13517900  |
| F | 2.41351400  | 3.16916800  | -3.19832300 |
| F | -0.04176600 | 3.69707200  | -3.65038000 |
| F | -2.93361900 | -2.74934800 | -3.49240400 |
| F | -0.81051100 | -4.01194600 | -3.55118100 |
| F | -0.22434300 | -5.03477100 | -1.43441700 |
| F | 2.26445800  | -4.42666000 | -1.48652600 |
| F | 4.29274900  | -2.25740500 | -1.60383900 |
| F | 4.54160300  | 0.18738500  | -2.17031200 |
| F | 3.09565400  | -0.63108100 | -4.05962000 |
| F | 1.69141300  | 1.24549200  | -4.70470400 |
| F | 0.54031800  | -2.22825700 | -4.59240100 |

|                                                     |             |             |             |
|-----------------------------------------------------|-------------|-------------|-------------|
| O                                                   | 4.64848600  | -0.06206700 | 2.22004500  |
| H                                                   | 5.41950700  | 0.21056900  | 1.69166300  |
| C <sub>1</sub> -S <sub>N</sub> 2'-C1-F <sub>k</sub> |             |             |             |
| RC                                                  |             |             |             |
| C                                                   | -3.10729200 | -0.45472700 | -0.39845000 |
| C                                                   | -3.37623700 | 1.00749600  | -0.50907500 |
| C                                                   | -2.88759400 | 1.71560900  | -1.82616100 |
| C                                                   | -1.96732100 | 2.95293600  | -1.26349400 |
| C                                                   | -0.59381300 | 3.23272500  | -1.93441200 |
| C                                                   | 0.60248200  | 3.87749200  | -1.05838800 |
| C                                                   | 1.94947500  | 3.06953800  | -1.58601000 |
| C                                                   | 3.05277600  | 2.58981600  | -0.58617800 |
| C                                                   | 3.93895000  | 1.21932300  | -0.89168700 |
| C                                                   | 4.02240300  | 0.49872600  | 0.53989700  |
| C                                                   | 4.03552800  | -1.07404900 | 0.66449000  |
| C                                                   | 3.14253600  | -1.67276500 | 1.92129400  |
| C                                                   | 1.97824400  | -2.25879200 | 1.20848700  |
| C                                                   | 0.74340200  | -2.52730800 | 1.76109300  |
| C                                                   | -0.30247600 | -2.92605400 | 0.95020700  |
| C                                                   | -1.60125300 | -3.00514700 | 1.66763800  |
| C                                                   | -2.81171900 | -2.61562200 | 0.71443600  |
| C                                                   | -3.42495300 | -1.15174100 | 0.89990800  |
| C                                                   | -2.62630400 | -1.26065900 | -1.34072000 |
| C                                                   | -2.50881400 | -2.69296200 | -0.90117200 |
| C                                                   | -1.17306000 | -3.33993900 | -1.39292400 |
| C                                                   | -0.10576900 | -3.07931000 | -0.40047900 |
| C                                                   | 1.13094700  | -2.82125400 | -0.95580300 |
| C                                                   | 2.16261800  | -2.37714300 | -0.15455300 |
| C                                                   | 3.49848500  | -1.90289400 | -0.60311600 |
| C                                                   | 3.42310800  | -1.26081900 | -2.03701700 |
| C                                                   | 3.41096900  | 0.34344400  | -2.09266000 |
| C                                                   | 1.99215500  | 0.65563100  | -2.40449700 |
| C                                                   | 1.34929000  | 1.85764000  | -2.19856900 |
| C                                                   | -0.01430800 | 1.94835000  | -2.38954200 |
| C                                                   | -0.73259300 | 0.85042500  | -2.80663800 |
| C                                                   | -2.21636600 | 0.73335700  | -2.87524200 |
| C                                                   | -2.38845000 | -0.85264600 | -2.76035600 |
| C                                                   | -1.02835700 | -1.45667700 | -3.32302100 |
| C                                                   | -0.49516900 | -2.83364600 | -2.77039300 |
| C                                                   | 1.13602400  | -2.85221700 | -2.43986900 |
| C                                                   | 2.07712900  | -1.69236300 | -2.91331700 |
| C                                                   | 1.28274100  | -0.43838700 | -2.85888600 |
| C                                                   | -0.08062400 | -0.34589000 | -3.04226300 |
| C                                                   | -2.61991700 | 1.65428000  | 0.61146700  |

|   |             |             |             |
|---|-------------|-------------|-------------|
| C | -1.82707000 | 2.64297600  | 0.20346100  |
| C | -1.04342300 | 3.53727400  | 1.10474300  |
| C | 0.39387300  | 3.86605300  | 0.51032100  |
| C | 1.22889600  | 2.82705300  | 1.18344500  |
| C | 2.38190900  | 2.23940500  | 0.69479300  |
| C | 2.89388300  | 1.10633600  | 1.29941500  |
| C | 2.29243900  | 0.59241900  | 2.43325800  |
| C | 2.58494700  | -0.73630200 | 3.04167400  |
| C | 1.14718700  | -1.09317100 | 3.79421800  |
| C | 0.30936900  | -2.27484600 | 3.16107400  |
| C | -1.27023100 | -2.14081900 | 2.96025300  |
| C | -1.67284400 | -0.71890200 | 2.75636700  |
| C | -3.01130400 | -0.34983100 | 2.18182000  |
| C | -2.89085000 | 1.22286200  | 2.02226900  |
| C | -1.73705800 | 1.65552100  | 2.99461400  |
| C | -0.77874000 | 2.83698000  | 2.50413000  |
| C | 0.60833100  | 2.30157700  | 2.30412800  |
| C | 1.15167100  | 1.19214900  | 2.93143300  |
| C | 0.37026500  | 0.29884100  | 3.83683500  |
| C | -1.00181100 | 0.33243200  | 3.22557600  |
| F | -4.72492600 | 1.24865300  | -0.31032800 |
| F | -3.96595700 | 2.28463000  | -2.43304600 |
| F | -2.71425200 | 4.10379600  | -1.37690100 |
| F | -0.81323800 | 4.06227600  | -3.01128200 |
| F | 0.72966400  | 5.17392900  | -1.43523200 |
| F | 2.54016700  | 3.86311300  | -2.53813100 |
| F | 3.95141400  | 3.61161500  | -0.40691100 |
| F | 5.19793600  | 1.61088600  | -1.21589000 |
| F | 5.19597600  | 0.93562500  | 1.12267600  |
| F | 5.32705600  | -1.44208700 | 0.86402900  |
| F | 3.89936400  | -2.65211800 | 2.51558100  |
| F | -1.81630400 | -4.30108100 | 2.08154300  |
| F | -3.80504300 | -3.50438200 | 0.97629300  |
| F | -4.79414300 | -1.28292400 | 0.95391300  |
| F | -3.53292300 | -3.40815000 | -1.47345300 |
| F | -1.38434900 | -4.69509300 | -1.51273200 |
| F | 4.32178600  | -3.00541500 | -0.71987300 |
| F | 4.51607200  | -1.68158100 | -2.72241100 |
| F | 4.17410100  | 0.69703800  | -3.18788300 |
| F | -2.66536500 | 1.10543600  | -4.12412900 |
| F | -3.40499500 | -1.30788400 | -3.55542800 |
| F | -1.17152300 | -1.59596300 | -4.68693200 |
| F | -0.73358600 | -3.77356100 | -3.71764600 |
| F | 1.62520200  | -4.04039800 | -2.91973400 |

|    |                                 |             |                          |
|----|---------------------------------|-------------|--------------------------|
| F  | 2.50397300                      | -1.96197400 | -4.18860600              |
| F  | -1.74372900                     | 4.70225100  | 1.27897200               |
| F  | 0.75306600                      | 5.11135400  | 0.97665300               |
| F  | 3.53077100                      | -0.62585000 | 4.02994300               |
| F  | 1.43621100                      | -1.44093800 | 5.07400600               |
| F  | 0.53366100                      | -3.39320500 | 3.93172900               |
| F  | -1.93559700                     | -2.64529400 | 4.04553100               |
| F  | -3.96270100                     | -0.61165500 | 3.14392800               |
| F  | -4.06863900                     | 1.81098700  | 2.41000800               |
| F  | -2.30400200                     | 2.05240300  | 4.17859000               |
| F  | -0.79425600                     | 3.81468500  | 3.46728700               |
| F  | 0.31449900                      | 0.76036700  | 5.13453600               |
| H  | -5.94968600                     | 0.76503200  | -2.32525300              |
| O  | -5.56416100                     | -0.09912300 | -2.52866200              |
| H  | -5.45343400                     | -0.09813300 | -3.49056000              |
| TS | imaginary vibrational frequency |             | -789.61 cm <sup>-1</sup> |
| C  | -3.43333200                     | -0.26312100 | -0.82400900              |
| C  | -3.33338200                     | 1.26402800  | -0.76856900              |
| C  | -2.62239200                     | 1.98251800  | -1.99627600              |
| C  | -1.69705500                     | 3.11432400  | -1.28333100              |
| C  | -0.25909700                     | 3.37601500  | -1.82429000              |
| C  | 0.88185800                      | 3.90066100  | -0.80328900              |
| C  | 2.23543600                      | 3.05776600  | -1.25872200              |
| C  | 3.21252600                      | 2.46183500  | -0.19357800              |
| C  | 4.05326700                      | 1.06753700  | -0.50148700              |
| C  | 3.97576900                      | 0.26768900  | 0.88876200               |
| C  | 3.90503400                      | -1.30689700 | 0.92406200               |
| C  | 2.87840300                      | -1.92751100 | 2.06463800               |
| C  | 1.75948800                      | -2.42489900 | 1.22405000               |
| C  | 0.46972500                      | -2.66674600 | 1.65345300               |
| C  | -0.51429700                     | -2.97876200 | 0.73480200               |
| C  | -1.88071600                     | -2.99759100 | 1.32830100               |
| C  | -2.97436300                     | -2.48955900 | 0.28332200               |
| C  | -3.65954400                     | -1.03740300 | 0.52141500               |
| C  | -2.32951600                     | -0.94773800 | -1.47855700              |
| C  | -2.46007800                     | -2.40554600 | -1.23968800              |
| C  | -1.19743600                     | -3.17460900 | -1.68759400              |
| C  | -0.20046300                     | -3.07082000 | -0.59984000              |
| C  | 1.08572900                      | -2.82792000 | -1.03446500              |
| C  | 2.05913400                      | -2.47627500 | -0.12286800              |
| C  | 3.44519500                      | -2.03709800 | -0.43058600              |
| C  | 3.52202400                      | -1.31425400 | -1.82786700              |
| C  | 3.59635700                      | 0.28781800  | -1.79588000              |
| C  | 2.23692100                      | 0.70004100  | -2.23490700              |

|   |             |             |             |
|---|-------------|-------------|-------------|
| C | 1.64530100  | 1.92527300  | -2.01661300 |
| C | 0.31378900  | 2.10841400  | -2.33658100 |
| C | -0.40626300 | 1.08406200  | -2.89795300 |
| C | -1.89242600 | 1.01088500  | -3.00197400 |
| C | -2.03682400 | -0.51684700 | -2.77262400 |
| C | -0.82973400 | -1.19907200 | -3.47600900 |
| C | -0.38230900 | -2.62545300 | -2.96858400 |
| C | 1.20843700  | -2.75267400 | -2.51243400 |
| C | 2.24518700  | -1.62638000 | -2.84554800 |
| C | 1.52089500  | -0.32777200 | -2.82794900 |
| C | 0.19419900  | -0.14233600 | -3.15573600 |
| C | -2.55395400 | 1.71258300  | 0.42898100  |
| C | -1.69166600 | 2.69089200  | 0.15823100  |
| C | -0.96979300 | 3.51005200  | 1.17623600  |
| C | 0.52638300  | 3.81126200  | 0.73684400  |
| C | 1.25116300  | 2.70049400  | 1.42174700  |
| C | 2.41205800  | 2.07892500  | 1.00041800  |
| C | 2.81400100  | 0.89074300  | 1.58208900  |
| C | 2.08952000  | 0.34900000  | 2.62734300  |
| C | 2.26360500  | -1.02329500 | 3.18121700  |
| C | 0.74864900  | -1.34457800 | 3.78253100  |
| C | -0.08275800 | -2.44749700 | 3.01724300  |
| C | -1.62689700 | -2.21432800 | 2.67577900  |
| C | -1.94280700 | -0.76975500 | 2.49714500  |
| C | -3.22076400 | -0.29215000 | 1.85331300  |
| C | -2.98967700 | 1.26221100  | 1.78468900  |
| C | -1.91875300 | 1.58242100  | 2.88233600  |
| C | -0.86763700 | 2.73810100  | 2.55425800  |
| C | 0.50763800  | 2.14864400  | 2.45177600  |
| C | 0.93728500  | 0.97929600  | 3.05646000  |
| C | 0.03260100  | 0.07831700  | 3.82944300  |
| C | -1.27092600 | 0.21521400  | 3.09302600  |
| F | -4.60423100 | 1.78914100  | -0.63653400 |
| F | -3.58625400 | 2.63101300  | -2.70377800 |
| F | -2.37935300 | 4.30798600  | -1.36322200 |
| F | -0.35934500 | 4.29708400  | -2.84244000 |
| F | 1.10441300  | 5.20872400  | -1.08391000 |
| F | 2.95214100  | 3.88344200  | -2.09001300 |
| F | 4.13963300  | 3.42165800  | 0.12993900  |
| F | 5.35409300  | 1.40917600  | -0.69024200 |
| F | 5.11173600  | 0.61366000  | 1.59465900  |
| F | 5.15585100  | -1.74982300 | 1.21265000  |
| F | 3.53954900  | -2.96785800 | 2.67014800  |
| F | -2.21767300 | -4.29133200 | 1.66037400  |

|    |             |             |             |
|----|-------------|-------------|-------------|
| F  | -3.99358700 | -3.39449100 | 0.34604400  |
| F  | -5.01759000 | -1.25938600 | 0.64386700  |
| F  | -3.52658800 | -2.94331300 | -1.99551100 |
| F  | -1.52420500 | -4.48997400 | -1.92677000 |
| F  | 4.23004200  | -3.16837300 | -0.54214100 |
| F  | 4.65018300  | -1.75710800 | -2.44015100 |
| F  | 4.48486300  | 0.65018100  | -2.79022300 |
| F  | -2.28465300 | 1.35346300  | -4.27434300 |
| F  | -3.47585200 | -0.84768200 | -3.70911700 |
| F  | -1.03566200 | -1.27062300 | -4.83197400 |
| F  | -0.57994600 | -3.49469200 | -3.99095900 |
| F  | 1.67345800  | -3.93598300 | -3.03198100 |
| F  | 2.77931900  | -1.87924900 | -4.08407800 |
| F  | -1.64814000 | 4.68972600  | 1.33856200  |
| F  | 0.88440200  | 5.01201000  | 1.30895200  |
| F  | 3.11926500  | -1.01178300 | 4.25462300  |
| F  | 0.90405400  | -1.76682000 | 5.06342400  |
| F  | 0.00137800  | -3.60832900 | 3.75294300  |
| F  | -2.42041300 | -2.72233200 | 3.67192000  |
| F  | -4.23326100 | -0.52536000 | 2.76263000  |
| F  | -4.16453700 | 1.91003500  | 2.07932100  |
| F  | -2.57924300 | 1.93749300  | 4.03097000  |
| F  | -0.93620800 | 3.66669300  | 3.56227800  |
| F  | -0.13387300 | 0.47310100  | 5.13989100  |
| H  | -4.25348900 | -0.74575800 | -2.76120800 |
| O  | -4.70736000 | -0.49130500 | -1.72786000 |
| H  | -5.23782200 | -1.22329500 | -1.35482300 |
| PC |             |             |             |
| C  | -3.64057000 | -0.35213300 | -0.64317800 |
| C  | -3.32046300 | 1.13255200  | -0.97849400 |
| C  | -2.62709600 | 1.46386500  | -2.37105900 |
| C  | -1.64232500 | 2.70704400  | -2.01352300 |
| C  | -0.22161500 | 2.77884400  | -2.65514300 |
| C  | 0.96833500  | 3.51320500  | -1.83776500 |
| C  | 2.28376100  | 2.53660200  | -2.08896200 |
| C  | 3.27808700  | 2.20873400  | -0.92568100 |
| C  | 4.07158500  | 0.75717700  | -0.87049500 |
| C  | 4.02105000  | 0.35897200  | 0.68596900  |
| C  | 3.90548300  | -1.14466800 | 1.14318000  |
| C  | 2.90092100  | -1.39736900 | 2.43643500  |
| C  | 1.73163300  | -2.04128500 | 1.78462900  |
| C  | 0.45062700  | -2.10444000 | 2.29283600  |
| C  | -0.57974500 | -2.59543700 | 1.51234900  |
| C  | -1.91778000 | -2.44296500 | 2.14330200  |

|   |             |             |             |
|---|-------------|-------------|-------------|
| C | -3.06105500 | -2.20838400 | 1.05105300  |
| C | -3.69132300 | -0.71505300 | 0.92430700  |
| C | -2.66304900 | -1.32913200 | -1.22242900 |
| C | -2.66040600 | -2.63116900 | -0.48348200 |
| C | -1.34816200 | -3.44796500 | -0.74126700 |
| C | -0.32085100 | -3.04323400 | 0.24199900  |
| C | 0.96047000  | -2.98553200 | -0.26806100 |
| C | 1.97913000  | -2.45471100 | 0.49140500  |
| C | 3.37037300  | -2.18662900 | 0.04583900  |
| C | 3.42704900  | -1.86971000 | -1.49568700 |
| C | 3.55395000  | -0.32209100 | -1.89986100 |
| C | 2.19906500  | 0.00928700  | -2.41879800 |
| C | 1.64453900  | 1.26690400  | -2.52156000 |
| C | 0.30704800  | 1.40681200  | -2.85335000 |
| C | -0.45926600 | 0.29762600  | -3.11023000 |
| C | -1.95850800 | 0.22696800  | -3.07550400 |
| C | -2.05989600 | -1.13256100 | -2.38535600 |
| C | -0.95869000 | -2.02459500 | -2.95608200 |
| C | -0.54578500 | -3.29105700 | -2.13772100 |
| C | 1.04622300  | -3.34325600 | -1.70343500 |
| C | 2.11147500  | -2.39837100 | -2.36466900 |
| C | 1.43813100  | -1.11479200 | -2.70347000 |
| C | 0.11034900  | -0.97375800 | -3.04168100 |
| C | -2.47150400 | 1.83898700  | 0.03280800  |
| C | -1.58966600 | 2.67640300  | -0.51294000 |
| C | -0.81990300 | 3.72324500  | 0.22367500  |
| C | 0.66465800  | 3.85001600  | -0.32048900 |
| C | 1.38452200  | 2.94000100  | 0.61860600  |
| C | 2.51063100  | 2.18600900  | 0.34800300  |
| C | 2.90238300  | 1.18574800  | 1.21828600  |
| C | 2.20418800  | 0.97307500  | 2.39307700  |
| C | 2.35796700  | -0.20700800 | 3.29075900  |
| C | 0.85389500  | -0.29890500 | 3.99752100  |
| C | -0.03844400 | -1.53313300 | 3.57511500  |
| C | -1.59012900 | -1.34603700 | 3.23533300  |
| C | -1.86338300 | 0.00995900  | 2.68586300  |
| C | -3.14985100 | 0.34526300  | 1.97750600  |
| C | -2.87170500 | 1.80379200  | 1.47159000  |
| C | -1.75681100 | 2.37315500  | 2.41292900  |
| C | -0.68811100 | 3.35690200  | 1.75620600  |
| C | 0.66612000  | 2.71365600  | 1.78080100  |
| C | 1.08656200  | 1.73762700  | 2.66883300  |
| C | 0.18475300  | 1.11147100  | 3.68088200  |
| C | -1.13936100 | 1.09198100  | 2.97091900  |



|    |             |             |             |
|----|-------------|-------------|-------------|
| F  | -4.54961800 | 1.78748900  | -0.96036000 |
| F  | -3.58176400 | 1.93506700  | -3.21526700 |
| F  | -2.29814600 | 3.86226000  | -2.37876000 |
| F  | -0.34570500 | 3.41571700  | -3.86880000 |
| F  | 1.21642300  | 4.69110800  | -2.46238400 |
| F  | 2.99726600  | 3.09572800  | -3.12091800 |
| F  | 4.24019800  | 3.18804800  | -0.89360300 |
| F  | 5.37367600  | 0.99225800  | -1.17636000 |
| F  | 5.19096800  | 0.83691400  | 1.24305000  |
| F  | 5.15125900  | -1.54560000 | 1.50386700  |
| F  | 3.54491500  | -2.27335400 | 3.27428000  |
| F  | -2.23525200 | -3.60600700 | 2.81005800  |
| F  | -4.08765000 | -3.01816300 | 1.42198400  |
| F  | -5.02522000 | -0.83737100 | 1.22246300  |
| F  | -3.70349100 | -3.39632000 | -0.94815500 |
| F  | -1.64844600 | -4.78252500 | -0.59098600 |
| F  | 4.10156800  | -3.34437600 | 0.22548000  |
| F  | 4.52138200  | -2.50438400 | -1.98862100 |
| F  | 4.42810900  | -0.27822000 | -2.96878100 |
| F  | -2.45533000 | 0.14446800  | -4.36370000 |
| F  | -3.94206400 | -2.21949900 | -4.07389400 |
| F  | -1.29208200 | -2.44578600 | -4.25013900 |
| F  | -0.80353900 | -4.38326200 | -2.89927600 |
| F  | 1.46047700  | -4.64192400 | -1.86883100 |
| F  | 2.59882800  | -3.01446500 | -3.48937400 |
| F  | -1.47078500 | 4.91988500  | 0.07363800  |
| F  | 1.07127100  | 5.14747700  | -0.10125000 |
| F  | 3.25178800  | 0.05430300  | 4.29837900  |
| F  | 1.04334000  | -0.37235900 | 5.33939800  |
| F  | 0.05602100  | -2.46966700 | 4.57896900  |
| F  | -2.35626100 | -1.54571900 | 4.35268800  |
| F  | -4.11122000 | 0.43648800  | 2.96723800  |
| F  | -4.01382200 | 2.55796200  | 1.59798000  |
| F  | -2.36727400 | 3.05023200  | 3.43782800  |
| F  | -0.69436800 | 4.52766100  | 2.47190600  |
| F  | 0.07959500  | 1.84820500  | 4.84110800  |
| O  | -4.86073200 | -0.70526600 | -1.23980900 |
| H  | -5.56664000 | -0.18870200 | -0.81333600 |
| H  | -3.16996300 | -2.35860100 | -4.58574500 |
| IP |             |             |             |
| C  | -3.51095700 | -0.18650400 | -1.40120000 |
| C  | -3.27149600 | 1.32320300  | -1.11055900 |
| C  | -2.41162700 | 2.17037500  | -2.14654100 |
| C  | -1.60089600 | 3.21155500  | -1.20166200 |

|   |             |             |             |
|---|-------------|-------------|-------------|
| C | -0.11457200 | 3.55579000  | -1.52962400 |
| C | 0.87594100  | 3.96005000  | -0.31369300 |
| C | 2.29317800  | 3.18333800  | -0.68251300 |
| C | 3.13120100  | 2.46838000  | 0.42824700  |
| C | 4.03075200  | 1.12393800  | 0.08035900  |
| C | 3.79019700  | 0.17019500  | 1.35171200  |
| C | 3.73839600  | -1.39731400 | 1.20125500  |
| C | 2.58349100  | -2.14247200 | 2.12627000  |
| C | 1.57982000  | -2.52578000 | 1.10015700  |
| C | 0.24934900  | -2.81033500 | 1.32898400  |
| C | -0.61093100 | -2.99769500 | 0.26249900  |
| C | -2.03470000 | -3.12616900 | 0.67235200  |
| C | -3.02324600 | -2.52756100 | -0.43240800 |
| C | -3.75528600 | -1.11221300 | -0.10770600 |
| C | -2.38302300 | -0.85126600 | -2.13079000 |
| C | -2.36973300 | -2.33482700 | -1.92551000 |
| C | -0.96764200 | -2.96027700 | -2.24188300 |
| C | -0.13366100 | -2.92672500 | -1.02161400 |
| C | 1.19778000  | -2.64699900 | -1.25345000 |
| C | 2.04564200  | -2.41471500 | -0.19416100 |
| C | 3.45850600  | -1.96423300 | -0.27342800 |
| C | 3.71115500  | -1.09243000 | -1.56014200 |
| C | 3.76314800  | 0.49664400  | -1.34403100 |
| C | 2.47574000  | 0.96500500  | -1.92659500 |
| C | 1.83566000  | 2.15455400  | -1.65211000 |
| C | 0.55443600  | 2.37493500  | -2.13006000 |
| C | -0.06578600 | 1.42633800  | -2.90514600 |
| C | -1.54510700 | 1.30453100  | -3.13387800 |
| C | -1.62077500 | -0.21521600 | -3.00775600 |
| C | -0.38634300 | -0.80096800 | -3.69350400 |
| C | 0.01354400  | -2.27075700 | -3.32923200 |
| C | 1.52216600  | -2.43977900 | -2.68406500 |
| C | 2.58688900  | -1.28977100 | -2.76961800 |
| C | 1.86437800  | 0.01148900  | -2.72749300 |
| C | 0.59441900  | 0.23532400  | -3.21293100 |
| C | -2.64278400 | 1.61941000  | 0.21592700  |
| C | -1.76576900 | 2.62242100  | 0.16988100  |
| C | -1.20375000 | 3.33622200  | 1.35493500  |
| C | 0.32775500  | 3.69542500  | 1.14848100  |
| C | 0.97896100  | 2.51864600  | 1.79536800  |
| C | 2.19220200  | 1.95003000  | 1.45834700  |
| C | 2.53930700  | 0.70781200  | 1.95585300  |
| C | 1.69908200  | 0.05215100  | 2.83730400  |
| C | 1.82194700  | -1.37389400 | 3.25326300  |

|   |             |             |             |
|---|-------------|-------------|-------------|
| C | 0.24517400  | -1.76319500 | 3.61647300  |
| C | -0.46831000 | -2.77226400 | 2.63036800  |
| C | -1.96447400 | -2.51064400 | 2.12819800  |
| C | -2.27030100 | -1.05492000 | 2.07546300  |
| C | -3.46464700 | -0.51107400 | 1.33559500  |
| C | -3.24317400 | 1.03736900  | 1.45367700  |
| C | -2.32772100 | 1.23993500  | 2.70865400  |
| C | -1.26436900 | 2.42575000  | 2.64566900  |
| C | 0.12249300  | 1.85582500  | 2.65882300  |
| C | 0.49182200  | 0.62846700  | 3.18327000  |
| C | -0.48962400 | -0.35474500 | 3.73026700  |
| C | -1.68968600 | -0.14061000 | 2.85174200  |
| F | -4.54223900 | 1.89254000  | -1.06003500 |
| F | -3.27083400 | 2.89999100  | -2.90638000 |
| F | -2.29411700 | 4.40226500  | -1.22135900 |
| F | -0.11976800 | 4.60055000  | -2.42553600 |
| F | 1.10931700  | 5.29253700  | -0.41219900 |
| F | 3.09835700  | 4.10854700  | -1.30089200 |
| F | 3.98945800  | 3.38921500  | 0.97765800  |
| F | 5.33823800  | 1.49086800  | 0.10398100  |
| F | 4.82153800  | 0.43371700  | 2.23164300  |
| F | 4.94856500  | -1.87254500 | 1.59188600  |
| F | 3.17318000  | -3.25141300 | 2.68008700  |
| F | -2.34758600 | -4.46125500 | 0.80443000  |
| F | -4.02069400 | -3.44208800 | -0.55978200 |
| F | -5.10301900 | -1.37188700 | -0.10140200 |
| F | -3.26623900 | -2.89843300 | -2.80503700 |
| F | -1.17364200 | -4.26184900 | -2.63945500 |
| F | 4.25085900  | -3.08728900 | -0.41035000 |
| F | 4.91603900  | -1.46936500 | -2.05944800 |
| F | 4.77858300  | 0.95829900  | -2.15902700 |
| F | -1.86610000 | 1.68198500  | -4.42359600 |
| F | -0.53584400 | -0.72494800 | -5.06533400 |
| F | -0.03279000 | -3.00840900 | -4.46561600 |
| F | 2.06797000  | -3.57272000 | -3.23630000 |
| F | 3.28490300  | -1.43180500 | -3.94193900 |
| F | -1.92639200 | 4.48470100  | 1.54658500  |
| F | 0.58605600  | 4.82559100  | 1.89186400  |
| F | 2.53392200  | -1.48613600 | 4.42069900  |
| F | 0.24409000  | -2.32913600 | 4.84997900  |
| F | -0.44298600 | -4.01310400 | 3.22488800  |
| F | -2.86593100 | -3.13291800 | 2.95023200  |
| F | -4.56409500 | -0.82413100 | 2.11336100  |
| F | -4.45249600 | 1.65872800  | 1.65660300  |

|   |             |             |             |
|---|-------------|-------------|-------------|
| F | -3.13449400 | 1.46544800  | 3.79473100  |
| F | -1.47615800 | 3.24195100  | 3.72828200  |
| F | -0.82614400 | -0.10967600 | 5.04440400  |
| O | -4.59995000 | -0.31769600 | -2.27994100 |
| H | -5.40081300 | -0.01740600 | -1.81565300 |

C<sub>1</sub>-S<sub>N</sub>2'-C19-F<sub>r</sub>

RC

|   |             |             |             |
|---|-------------|-------------|-------------|
| C | -3.08938600 | -0.31350100 | -0.47961400 |
| C | -3.27208900 | 1.11306100  | -0.86710600 |
| C | -2.68416100 | 1.54460200  | -2.26243100 |
| C | -1.70851800 | 2.80705600  | -1.87924400 |
| C | -0.28932000 | 2.87849600  | -2.51274300 |
| C | 0.91135800  | 3.59716800  | -1.70326300 |
| C | 2.22265400  | 2.62959600  | -2.01055500 |
| C | 3.24795400  | 2.26978100  | -0.88555300 |
| C | 4.05004300  | 0.81555300  | -0.89999100 |
| C | 4.02525700  | 0.35827900  | 0.63790700  |
| C | 3.92644000  | -1.16516000 | 1.03670100  |
| C | 2.94431100  | -1.47558500 | 2.33089800  |
| C | 1.77286100  | -2.10930900 | 1.67216200  |
| C | 0.50141100  | -2.19981600 | 2.19856200  |
| C | -0.53465500 | -2.67738100 | 1.41823300  |
| C | -1.86339200 | -2.54576300 | 2.07021200  |
| C | -3.00157000 | -2.25881800 | 0.99980500  |
| C | -3.51667300 | -0.75096100 | 0.89540900  |
| C | -2.61397100 | -1.29580500 | -1.23680500 |
| C | -2.63229500 | -2.63247400 | -0.55691200 |
| C | -1.33685300 | -3.44740800 | -0.85979900 |
| C | -0.29448300 | -3.08220700 | 0.12752300  |
| C | 0.97818100  | -2.99997900 | -0.40065200 |
| C | 2.00436600  | -2.48177000 | 0.36304500  |
| C | 3.38644200  | -2.17432100 | -0.09150500 |
| C | 3.41293100  | -1.79521200 | -1.61754400 |
| C | 3.51323000  | -0.22844200 | -1.95418000 |
| C | 2.13337300  | 0.10830500  | -2.38992600 |
| C | 1.56796900  | 1.36527400  | -2.43143700 |
| C | 0.22257400  | 1.50191200  | -2.70447100 |
| C | -0.54993100 | 0.39223600  | -2.95875700 |
| C | -2.03191500 | 0.35753700  | -3.08485300 |
| C | -2.31773600 | -1.16343300 | -2.69696000 |
| C | -0.98902800 | -1.94739400 | -3.08362400 |
| C | -0.57208700 | -3.23349600 | -2.26841900 |
| C | 1.03994800  | -3.29190500 | -1.85509400 |
| C | 2.07799600  | -2.29384700 | -2.47419900 |

|   |             |             |             |
|---|-------------|-------------|-------------|
| C | 1.37007700  | -1.00485800 | -2.68364500 |
| C | 0.02507000  | -0.86526100 | -2.95301200 |
| C | -2.52944400 | 1.91211800  | 0.16056900  |
| C | -1.65374400 | 2.76164600  | -0.37356100 |
| C | -0.84260600 | 3.75009000  | 0.39694900  |
| C | 0.63766800  | 3.87724000  | -0.17074100 |
| C | 1.37105200  | 2.92476100  | 0.71502100  |
| C | 2.50116700  | 2.19219100  | 0.39875700  |
| C | 2.90979700  | 1.15708900  | 1.21898200  |
| C | 2.22914200  | 0.89087500  | 2.39251900  |
| C | 2.40669700  | -0.32240900 | 3.23922900  |
| C | 0.91835500  | -0.45199100 | 3.96702200  |
| C | 0.02896400  | -1.67529800 | 3.50783600  |
| C | -1.52773700 | -1.48411200 | 3.20417800  |
| C | -1.82378400 | -0.10000500 | 2.73289700  |
| C | -3.11019300 | 0.24036400  | 2.03678600  |
| C | -2.88096300 | 1.75182600  | 1.61000600  |
| C | -1.73813400 | 2.27903400  | 2.54928900  |
| C | -0.68155100 | 3.29327400  | 1.90910200  |
| C | 0.67099700  | 2.64594000  | 1.87614400  |
| C | 1.11243900  | 1.63717200  | 2.71681500  |
| C | 0.23678900  | 0.96966900  | 3.72434600  |
| C | -1.10375700 | 0.97640300  | 3.04591800  |
| F | -4.61502200 | 1.43024300  | -0.80207000 |
| F | -3.70289400 | 2.03950100  | -3.00923600 |
| F | -2.36926500 | 3.95920300  | -2.23782100 |
| F | -0.40553300 | 3.51324100  | -3.72861900 |
| F | 1.14104100  | 4.79593200  | -2.29379300 |
| F | 2.90395100  | 3.20570100  | -3.05372000 |
| F | 4.20658100  | 3.25053600  | -0.83760100 |
| F | 5.34491100  | 1.06671700  | -1.22165500 |
| F | 5.20051000  | 0.82127000  | 1.19663700  |
| F | 5.18073200  | -1.56798400 | 1.36460900  |
| F | 3.60722300  | -2.37743300 | 3.12601600  |
| F | -2.18855200 | -3.72973300 | 2.69408000  |
| F | -4.06654500 | -3.02647800 | 1.35494100  |
| F | -4.90032100 | -0.79098000 | 0.89993600  |
| F | -3.69464500 | -3.35968400 | -1.06137600 |
| F | -1.64443000 | -4.78529100 | -0.75420200 |
| F | 4.13788200  | -3.32624200 | 0.03107600  |
| F | 4.50108800  | -2.39720100 | -2.16076600 |
| F | 4.34426200  | -0.12422500 | -3.05182400 |
| F | -2.39417200 | 0.52494800  | -4.40077500 |
| F | -3.35938200 | -1.67070900 | -3.42229200 |

|    |                                                          |             |             |
|----|----------------------------------------------------------|-------------|-------------|
| F  | -1.09513000                                              | -2.32244400 | -4.40465500 |
| F  | -0.83601900                                              | -4.31221600 | -3.04545200 |
| F  | 1.46368200                                               | -4.57425000 | -2.09471500 |
| F  | 2.53758500                                               | -2.81420900 | -3.65684500 |
| F  | -1.46326000                                              | 4.96988100  | 0.33155500  |
| F  | 1.06444900                                               | 5.16031500  | 0.09097800  |
| F  | 3.31678000                                               | -0.09426800 | 4.24053600  |
| F  | 1.13060400                                               | -0.58212300 | 5.30114700  |
| F  | 0.14400900                                               | -2.64969000 | 4.47325000  |
| F  | -2.27134900                                              | -1.74609500 | 4.32400700  |
| F  | -4.11615100                                              | 0.20596300  | 2.97853000  |
| F  | -4.03240700                                              | 2.46366800  | 1.83474600  |
| F  | -2.32228700                                              | 2.91285000  | 3.61594100  |
| F  | -0.66527700                                              | 4.42403000  | 2.68670000  |
| F  | 0.15996400                                               | 1.65735300  | 4.91615500  |
| H  | -5.58614600                                              | -1.93845400 | -1.98650000 |
| O  | -5.68492100                                              | -0.97478300 | -1.96743600 |
| H  | -6.12324100                                              | -0.79787200 | -1.12220000 |
| TS | imaginary vibrational frequency -815.93 cm <sup>-1</sup> |             |             |
| C  | -2.78304900                                              | -0.27694100 | -0.44626700 |
| C  | -2.98749600                                              | 0.98901400  | -1.01133800 |
| C  | -2.56749300                                              | 1.34288900  | -2.45310400 |
| C  | -1.60080900                                              | 2.64745100  | -2.22151300 |
| C  | -0.16786200                                              | 2.58491800  | -2.82155300 |
| C  | 1.03962500                                               | 3.35441500  | -2.08823600 |
| C  | 2.32089600                                               | 2.31331400  | -2.25734100 |
| C  | 3.31624400                                               | 2.05380700  | -1.08298200 |
| C  | 4.06798800                                               | 0.58103000  | -0.91550600 |
| C  | 4.00332800                                               | 0.30721700  | 0.66316000  |
| C  | 3.84689400                                               | -1.15623800 | 1.23202200  |
| C  | 2.83864600                                               | -1.27823600 | 2.53467500  |
| C  | 1.65268400                                               | -1.93698300 | 1.93006200  |
| C  | 0.37363500                                               | -1.91997500 | 2.44118900  |
| C  | -0.67002500                                              | -2.43367000 | 1.69614300  |
| C  | -1.99294500                                              | -2.20759700 | 2.31455600  |
| C  | -3.10260500                                              | -2.00054900 | 1.21092700  |
| C  | -3.41777200                                              | -0.50323200 | 0.88776500  |
| C  | -3.03584200                                              | -1.43667300 | -1.27314400 |
| C  | -2.84289900                                              | -2.64858600 | -0.30983800 |
| C  | -1.47989700                                              | -3.43784500 | -0.49929500 |
| C  | -0.44324300                                              | -2.96691800 | 0.45300000  |
| C  | 0.84243900                                               | -3.01659100 | -0.04564800 |
| C  | 1.88257000                                               | -2.46456200 | 0.67583300  |
| C  | 3.28426600                                               | -2.27074900 | 0.21845800  |

|   |             |             |             |
|---|-------------|-------------|-------------|
| C | 3.35098700  | -2.07609300 | -1.33889800 |
| C | 3.51138700  | -0.56195000 | -1.85228300 |
| C | 2.14937500  | -0.23300100 | -2.34311700 |
| C | 1.62713400  | 1.02937000  | -2.53167100 |
| C | 0.29138200  | 1.17695700  | -2.83438100 |
| C | -0.51385800 | 0.06839800  | -2.97007300 |
| C | -1.98172300 | 0.07824900  | -3.16365000 |
| C | -2.39527100 | -1.42202900 | -2.69112700 |
| C | -1.02801200 | -2.25288900 | -2.85123800 |
| C | -0.68320100 | -3.43970000 | -1.89303000 |
| C | 0.92104000  | -3.50316500 | -1.44439700 |
| C | 2.00915000  | -2.62641900 | -2.15561800 |
| C | 1.35010800  | -1.34606800 | -2.51277700 |
| C | 0.01057100  | -1.19236300 | -2.79848300 |
| C | -2.52132300 | 2.04862800  | -0.10541700 |
| C | -1.61904900 | 2.82717600  | -0.72128300 |
| C | -0.75247200 | 3.83932800  | -0.04830300 |
| C | 0.74805200  | 3.82098500  | -0.60656800 |
| C | 1.43179000  | 2.94769800  | 0.39305600  |
| C | 2.54380600  | 2.14901400  | 0.18492900  |
| C | 2.90768400  | 1.20471900  | 1.12631100  |
| C | 2.20538600  | 1.10283800  | 2.31221700  |
| C | 2.33215000  | -0.00870200 | 3.29643600  |
| C | 0.83386300  | -0.00242700 | 4.01248600  |
| C | -0.09190400 | -1.24188600 | 3.68062300  |
| C | -1.63664600 | -1.03457800 | 3.33887600  |
| C | -1.87295500 | 0.30450900  | 2.72261900  |
| C | -3.11361500 | 0.58363200  | 1.93823900  |
| C | -2.86485500 | 2.03813500  | 1.35791400  |
| C | -1.71299400 | 2.63916500  | 2.24784900  |
| C | -0.61532400 | 3.53351700  | 1.50942100  |
| C | 0.71101300  | 2.83332100  | 1.56764600  |
| C | 1.11229800  | 1.91953600  | 2.53000200  |
| C | 0.20918400  | 1.40988600  | 3.60343800  |
| C | -1.12641300 | 1.38885200  | 2.91874300  |
| F | -4.75111100 | 1.00320400  | -1.24757900 |
| F | -3.61304200 | 1.78185300  | -3.20226700 |
| F | -2.22273900 | 3.73760900  | -2.78222500 |
| F | -0.23932300 | 3.06146400  | -4.11257500 |
| F | 1.31824500  | 4.46670300  | -2.81259500 |
| F | 3.03295900  | 2.73579500  | -3.35241600 |
| F | 4.30795300  | 3.00156700  | -1.12919000 |
| F | 5.37544700  | 0.75051700  | -1.23981900 |
| F | 5.18554500  | 0.79214700  | 1.18818600  |

|    |             |             |             |
|----|-------------|-------------|-------------|
| F  | 5.08227300  | -1.56127700 | 1.62358800  |
| F  | 3.45457200  | -2.10655000 | 3.44025500  |
| F  | -2.35134200 | -3.31163900 | 3.05752100  |
| F  | -4.22632900 | -2.61111800 | 1.68590400  |
| F  | -4.83417000 | -0.48051700 | 0.77456600  |
| F  | -3.85699600 | -3.55042300 | -0.53214300 |
| F  | -1.77413200 | -4.75529800 | -0.20857000 |
| F  | 3.98542200  | -3.42878800 | 0.49152500  |
| F  | 4.42531100  | -2.77299700 | -1.78719300 |
| F  | 4.35978300  | -0.61180300 | -2.94046500 |
| F  | -2.27969400 | 0.17014100  | -4.50341100 |
| F  | -3.26918800 | -1.94267800 | -3.59335400 |
| F  | -1.04343300 | -2.77496300 | -4.12895700 |
| F  | -0.98353000 | -4.59482500 | -2.53788300 |
| F  | 1.29745500  | -4.82016000 | -1.50715100 |
| F  | 2.46434800  | -3.29289500 | -3.26409000 |
| F  | -1.28498800 | 5.08823700  | -0.23741400 |
| F  | 1.23326300  | 5.10529000  | -0.48634200 |
| F  | 3.24065500  | 0.30197800  | 4.27717100  |
| F  | 1.02727700  | 0.00916100  | 5.35607900  |
| F  | -0.01394900 | -2.10738400 | 4.74838600  |
| F  | -2.39909800 | -1.15505100 | 4.46957500  |
| F  | -4.16813800 | 0.64479700  | 2.82514600  |
| F  | -4.00253000 | 2.78893100  | 1.51243400  |
| F  | -2.29210200 | 3.41933200  | 3.21653400  |
| F  | -0.55406200 | 4.74032200  | 2.16156100  |
| F  | 0.16514800  | 2.23248800  | 4.70859900  |
| H  | -5.10554100 | -1.87797100 | -0.99383500 |
| O  | -4.60569400 | -1.34874700 | -1.64688500 |
| H  | -4.83492100 | -0.23871900 | -1.47669800 |
| PC |             |             |             |
| C  | -3.03340400 | -0.48531400 | -0.54777400 |
| C  | -2.79627100 | 0.72296700  | -1.04290300 |
| C  | -2.53281100 | 1.05468100  | -2.47927000 |
| C  | -1.68010300 | 2.45092600  | -2.35089100 |
| C  | -0.24177600 | 2.45641600  | -2.93753700 |
| C  | 0.90952600  | 3.31662400  | -2.20523200 |
| C  | 2.24470000  | 2.33894600  | -2.31129300 |
| C  | 3.22830600  | 2.17900800  | -1.10919500 |
| C  | 4.05534100  | 0.75868500  | -0.87210000 |
| C  | 3.97630800  | 0.54123200  | 0.71547800  |
| C  | 3.88844900  | -0.90541300 | 1.33859700  |
| C  | 2.86011200  | -1.03469600 | 2.62666900  |
| C  | 1.72107100  | -1.77172300 | 2.02262300  |



|   |             |             |             |
|---|-------------|-------------|-------------|
| C | 0.43049500  | -1.79984100 | 2.50421000  |
| C | -0.57162200 | -2.38553400 | 1.75424600  |
| C | -1.91872200 | -2.22999700 | 2.34845000  |
| C | -3.03999900 | -2.15072900 | 1.22697700  |
| C | -3.51793700 | -0.68568100 | 0.85728600  |
| C | -3.07857500 | -1.75291000 | -1.33901000 |
| C | -2.68449400 | -2.86086200 | -0.25901600 |
| C | -1.26215700 | -3.53857300 | -0.39838400 |
| C | -0.28270700 | -2.94774400 | 0.53894500  |
| C | 1.01446500  | -2.95622500 | 0.07114800  |
| C | 2.00784000  | -2.32940500 | 0.79306700  |
| C | 3.40724200  | -2.08393100 | 0.35743500  |
| C | 3.49410300  | -1.94588900 | -1.20568900 |
| C | 3.57964400  | -0.44660700 | -1.77463800 |
| C | 2.21150900  | -0.21300300 | -2.30459200 |
| C | 1.62546200  | 1.01058100  | -2.55473500 |
| C | 0.29244900  | 1.07261000  | -2.89816600 |
| C | -0.44903700 | -0.08643400 | -3.00911200 |
| C | -1.91849900 | -0.16582600 | -3.20658200 |
| C | -2.25632000 | -1.67966200 | -2.70170500 |
| C | -0.83847900 | -2.42854300 | -2.79436400 |
| C | -0.44639700 | -3.55107100 | -1.77913400 |
| C | 1.14909300  | -3.50542800 | -1.29961300 |
| C | 2.20089200  | -2.60111000 | -2.02630500 |
| C | 1.47883100  | -1.37411700 | -2.44635200 |
| C | 0.13813700  | -1.30749300 | -2.76598200 |
| C | -2.49804600 | 1.85018200  | -0.20171800 |
| C | -1.70789900 | 2.71428200  | -0.85748600 |
| C | -0.93771300 | 3.80992400  | -0.21207500 |
| C | 0.57303100  | 3.83290300  | -0.74469100 |
| C | 1.27549500  | 3.02989100  | 0.30084600  |
| C | 2.42892000  | 2.28063000  | 0.14142800  |
| C | 2.82469600  | 1.39380600  | 1.12514100  |
| C | 2.10481800  | 1.29682900  | 2.30132600  |
| C | 2.27149700  | 0.23129300  | 3.33059000  |
| C | 0.75945200  | 0.18125300  | 4.01873500  |
| C | -0.09506500 | -1.11543200 | 3.71447000  |
| C | -1.64441300 | -1.00815200 | 3.33661400  |
| C | -1.93568600 | 0.28685400  | 2.65691300  |
| C | -3.18426900 | 0.48144200  | 1.85042600  |
| C | -2.95576500 | 1.91603200  | 1.22129400  |
| C | -1.87881600 | 2.61329500  | 2.11697500  |
| C | -0.81933900 | 3.55093200  | 1.36361900  |
| C | 0.53940100  | 2.92172000  | 1.46718200  |

|    |             |             |             |
|----|-------------|-------------|-------------|
| C  | 0.96554800  | 2.06080300  | 2.46826100  |
| C  | 0.06954900  | 1.53778600  | 3.54328200  |
| C  | -1.24591600 | 1.41482600  | 2.83213500  |
| F  | -5.37396700 | 1.76787500  | -0.99979600 |
| F  | -3.73459200 | 1.36819200  | -3.10186000 |
| F  | -2.39117400 | 3.44574000  | -2.97643500 |
| F  | -0.31964900 | 2.89206900  | -4.24151700 |
| F  | 1.14361300  | 4.41226900  | -2.96987500 |
| F  | 2.95684600  | 2.75874900  | -3.40761100 |
| F  | 4.16688300  | 3.17812900  | -1.17633300 |
| F  | 5.35753900  | 0.98742800  | -1.18093600 |
| F  | 5.12053400  | 1.11021800  | 1.24010800  |
| F  | 5.13498200  | -1.22716000 | 1.76913600  |
| F  | 3.49924000  | -1.79796400 | 3.57193200  |
| F  | -2.20332400 | -3.33229800 | 3.12515500  |
| F  | -4.11055600 | -2.82942300 | 1.71615300  |
| F  | -4.89599400 | -0.72551900 | 0.78475800  |
| F  | -3.58198600 | -3.88692000 | -0.41714600 |
| F  | -1.42982900 | -4.86487800 | -0.04264200 |
| F  | 4.16041100  | -3.19304800 | 0.68757600  |
| F  | 4.61438400  | -2.59730600 | -1.60691800 |
| F  | 4.44998900  | -0.48929700 | -2.84565000 |
| F  | -2.23922700 | -0.08591400 | -4.54136400 |
| F  | -3.04957300 | -2.26665100 | -3.64837400 |
| F  | -0.77626200 | -3.00569400 | -4.04912800 |
| F  | -0.66986100 | -4.74724600 | -2.38045600 |
| F  | 1.60068500  | -4.79974800 | -1.29105200 |
| F  | 2.71520000  | -3.28193300 | -3.09924700 |
| F  | -1.52010700 | 5.02529600  | -0.45185700 |
| F  | 1.00474900  | 5.13898200  | -0.67382600 |
| F  | 3.14087000  | 0.62845300  | 4.31531400  |
| F  | 0.92399000  | 0.25178700  | 5.36409200  |
| F  | 0.01153900  | -1.94164200 | 4.80984900  |
| F  | -2.42307700 | -1.12246400 | 4.45608700  |
| F  | -4.23886400 | 0.56279800  | 2.73471000  |
| F  | -4.11789600 | 2.63522000  | 1.25730300  |
| F  | -2.52238500 | 3.38745300  | 3.04787400  |
| F  | -0.83706600 | 4.77553000  | 1.98265800  |
| F  | -0.04953400 | 2.39765800  | 4.61383100  |
| O  | -4.43739500 | -1.91145500 | -1.66699700 |
| H  | -4.57427300 | -2.82301100 | -1.97889200 |
| H  | -5.22025800 | 1.59590300  | -1.90868900 |
| IP |             |             |             |
| C  | -3.10572700 | -0.05715300 | -0.80774100 |

|   |             |             |             |
|---|-------------|-------------|-------------|
| C | -2.61288800 | 0.98885500  | -1.46129900 |
| C | -2.19565300 | 1.02497000  | -2.90187000 |
| C | -1.12004300 | 2.26812500  | -2.90591900 |
| C | 0.33852400  | 1.94615600  | -3.33035100 |
| C | 1.56148000  | 2.73037800  | -2.62928300 |
| C | 2.71199500  | 1.55211900  | -2.43726500 |
| C | 3.55855400  | 1.45318400  | -1.12931000 |
| C | 4.10841900  | -0.01538800 | -0.58301700 |
| C | 3.87204200  | 0.06445600  | 1.00146200  |
| C | 3.49162500  | -1.21881300 | 1.83525600  |
| C | 2.36131100  | -0.95794000 | 3.01382300  |
| C | 1.16192000  | -1.60200000 | 2.42033400  |
| C | -0.14694000 | -1.34275700 | 2.76333900  |
| C | -1.17459700 | -1.88571700 | 2.01596200  |
| C | -2.51623600 | -1.42176000 | 2.43566400  |
| C | -3.51918700 | -1.36741300 | 1.20538300  |
| C | -3.71006000 | 0.06589400  | 0.55939100  |
| C | -3.30126000 | -1.42327700 | -1.38396600 |
| C | -3.18052400 | -2.37252700 | -0.10272200 |
| C | -1.88867900 | -3.27657400 | 0.01679000  |
| C | -0.89613600 | -2.69062100 | 0.94319300  |
| C | 0.41193800  | -2.98507700 | 0.62100500  |
| C | 1.44056500  | -2.40431600 | 1.33228500  |
| C | 2.89046300  | -2.46169700 | 1.01153800  |
| C | 3.11771300  | -2.61570800 | -0.53611400 |
| C | 3.50294400  | -1.27086300 | -1.32491700 |
| C | 2.23924200  | -0.92171500 | -2.02350300 |
| C | 1.89323900  | 0.31552100  | -2.52632900 |
| C | 0.62086400  | 0.52457300  | -3.01227900 |
| C | -0.29937300 | -0.50469300 | -3.01376300 |
| C | -1.74112500 | -0.38595100 | -3.35093900 |
| C | -2.37283900 | -1.71605200 | -2.64750700 |
| C | -1.10089800 | -2.68248200 | -2.46874300 |
| C | -0.98555300 | -3.65772800 | -1.25230900 |
| C | 0.55331200  | -3.77998300 | -0.62273200 |
| C | 1.79672900  | -3.19269200 | -1.37129600 |
| C | 1.33030700  | -1.96000700 | -2.05421400 |
| C | 0.04886600  | -1.74045600 | -2.51730200 |
| C | -2.17941200 | 2.17726500  | -0.77982400 |
| C | -1.21361200 | 2.78741300  | -1.48394300 |
| C | -0.32083100 | 3.84668300  | -0.94421600 |
| C | 1.20761700  | 3.54069800  | -1.31311300 |
| C | 1.67853900  | 2.83277400  | -0.08498800 |
| C | 2.69462300  | 1.89585600  | -0.00166600 |

|   |             |             |             |
|---|-------------|-------------|-------------|
| C | 2.85481900  | 1.14369500  | 1.14679200  |
| C | 2.04242200  | 1.36881900  | 2.24230500  |
| C | 1.94626100  | 0.48795500  | 3.44106100  |
| C | 0.40028800  | 0.79641700  | 3.96786300  |
| C | -0.63787900 | -0.38477000 | 3.78809700  |
| C | -2.11231400 | -0.10485200 | 3.23932300  |
| C | -2.12403400 | 1.08062400  | 2.33494200  |
| C | -3.25376000 | 1.32175600  | 1.38079500  |
| C | -2.72998600 | 2.56258200  | 0.55400600  |
| C | -1.63118900 | 3.23916200  | 1.43447900  |
| C | -0.37057200 | 3.85329900  | 0.65624100  |
| C | 0.84774500  | 3.04709300  | 1.00049600  |
| C | 1.04231400  | 2.31926000  | 2.16541400  |
| C | -0.00870100 | 2.14018200  | 3.21192500  |
| C | -1.26847900 | 2.10194500  | 2.39756600  |
| F | -3.26753800 | 1.41402700  | -3.66349500 |
| F | -1.59513400 | 3.24297300  | -3.74810900 |
| F | 0.43866900  | 2.15148300  | -4.68819600 |
| F | 2.03938200  | 3.62549100  | -3.52949700 |
| F | 3.56730300  | 1.65580500  | -3.50622700 |
| F | 4.65742200  | 2.26589500  | -1.25469500 |
| F | 5.45045300  | -0.05034900 | -0.78603700 |
| F | 5.05248400  | 0.53332800  | 1.54440600  |
| F | 4.62857700  | -1.65040300 | 2.43839800  |
| F | 2.78628700  | -1.63489400 | 4.12979300  |
| F | -3.04311400 | -2.31352900 | 3.34489900  |
| F | -4.72386100 | -1.77309200 | 1.68529900  |
| F | -5.06852200 | 0.23177000  | 0.35956000  |
| F | -4.22497700 | -3.25736600 | -0.18241700 |
| F | -2.30590300 | -4.47811600 | 0.56141700  |
| F | 3.41452100  | -3.59856400 | 1.59383800  |
| F | 4.13532800  | -3.49610700 | -0.70933400 |
| F | 4.43215500  | -1.63631600 | -2.27829000 |
| F | -1.93667900 | -0.49716000 | -4.70711600 |
| F | -3.17989000 | -2.33014300 | -3.56541500 |
| F | -1.04176200 | -3.47270300 | -3.60189300 |
| F | -1.36511300 | -4.89063100 | -1.67420200 |
| F | 0.77254300  | -5.10750100 | -0.36019500 |
| F | 2.26562000  | -4.12314000 | -2.26224300 |
| F | -0.66914200 | 5.07566800  | -1.43608200 |
| F | 1.84878400  | 4.75627800  | -1.40598800 |
| F | 2.79376800  | 0.91183400  | 4.43364600  |
| F | 0.47219100  | 1.07576600  | 5.29403000  |
| F | -0.75746300 | -1.01247200 | 5.00690600  |

|   |             |             |             |
|---|-------------|-------------|-------------|
| F | -2.98220500 | 0.10298100  | 4.27512200  |
| F | -4.34318200 | 1.72935200  | 2.12256600  |
| F | -3.76326300 | 3.43764400  | 0.32654400  |
| F | -2.20924600 | 4.25579000  | 2.14991800  |
| F | -0.22662800 | 5.15446200  | 1.06769900  |
| F | -0.05896100 | 3.18240600  | 4.11211100  |
| O | -4.63771000 | -1.43012800 | -1.81762600 |
| H | -4.88362000 | -2.34352500 | -2.04527200 |

C<sub>1</sub>-S<sub>N</sub>2'-C19-F<sub>i</sub>

RC

|   |             |             |             |
|---|-------------|-------------|-------------|
| C | -3.08938600 | -0.31350100 | -0.47961400 |
| C | -3.27208900 | 1.11306100  | -0.86710600 |
| C | -2.68416100 | 1.54460200  | -2.26243100 |
| C | -1.70851800 | 2.80705600  | -1.87924400 |
| C | -0.28932000 | 2.87849600  | -2.51274300 |
| C | 0.91135800  | 3.59716800  | -1.70326300 |
| C | 2.22265400  | 2.62959600  | -2.01055500 |
| C | 3.24795400  | 2.26978100  | -0.88555300 |
| C | 4.05004300  | 0.81555300  | -0.89999100 |
| C | 4.02525700  | 0.35827900  | 0.63790700  |
| C | 3.92644000  | -1.16516000 | 1.03670100  |
| C | 2.94431100  | -1.47558500 | 2.33089800  |
| C | 1.77286100  | -2.10930900 | 1.67216200  |
| C | 0.50141100  | -2.19981600 | 2.19856200  |
| C | -0.53465500 | -2.67738100 | 1.41823300  |
| C | -1.86339200 | -2.54576300 | 2.07021200  |
| C | -3.00157000 | -2.25881800 | 0.99980500  |
| C | -3.51667300 | -0.75096100 | 0.89540900  |
| C | -2.61397100 | -1.29580500 | -1.23680500 |
| C | -2.63229500 | -2.63247400 | -0.55691200 |
| C | -1.33685300 | -3.44740800 | -0.85979900 |
| C | -0.29448300 | -3.08220700 | 0.12752300  |
| C | 0.97818100  | -2.99997900 | -0.40065200 |
| C | 2.00436600  | -2.48177000 | 0.36304500  |
| C | 3.38644200  | -2.17432100 | -0.09150500 |
| C | 3.41293100  | -1.79521200 | -1.61754400 |
| C | 3.51323000  | -0.22844200 | -1.95418000 |
| C | 2.13337300  | 0.10830500  | -2.38992600 |
| C | 1.56796900  | 1.36527400  | -2.43143700 |
| C | 0.22257400  | 1.50191200  | -2.70447100 |
| C | -0.54993100 | 0.39223600  | -2.95875700 |
| C | -2.03191500 | 0.35753700  | -3.08485300 |
| C | -2.31773600 | -1.16343300 | -2.69696000 |
| C | -0.98902800 | -1.94739400 | -3.08362400 |

|   |             |             |             |
|---|-------------|-------------|-------------|
| C | -0.57208700 | -3.23349600 | -2.26841900 |
| C | 1.03994800  | -3.29190500 | -1.85509400 |
| C | 2.07799600  | -2.29384700 | -2.47419900 |
| C | 1.37007700  | -1.00485800 | -2.68364500 |
| C | 0.02507000  | -0.86526100 | -2.95301200 |
| C | -2.52944400 | 1.91211800  | 0.16056900  |
| C | -1.65374400 | 2.76164600  | -0.37356100 |
| C | -0.84260600 | 3.75009000  | 0.39694900  |
| C | 0.63766800  | 3.87724000  | -0.17074100 |
| C | 1.37105200  | 2.92476100  | 0.71502100  |
| C | 2.50116700  | 2.19219100  | 0.39875700  |
| C | 2.90979700  | 1.15708900  | 1.21898200  |
| C | 2.22914200  | 0.89087500  | 2.39251900  |
| C | 2.40669700  | -0.32240900 | 3.23922900  |
| C | 0.91835500  | -0.45199100 | 3.96702200  |
| C | 0.02896400  | -1.67529800 | 3.50783600  |
| C | -1.52773700 | -1.48411200 | 3.20417800  |
| C | -1.82378400 | -0.10000500 | 2.73289700  |
| C | -3.11019300 | 0.24036400  | 2.03678600  |
| C | -2.88096300 | 1.75182600  | 1.61000600  |
| C | -1.73813400 | 2.27903400  | 2.54928900  |
| C | -0.68155100 | 3.29327400  | 1.90910200  |
| C | 0.67099700  | 2.64594000  | 1.87614400  |
| C | 1.11243900  | 1.63717200  | 2.71681500  |
| C | 0.23678900  | 0.96966900  | 3.72434600  |
| C | -1.10375700 | 0.97640300  | 3.04591800  |
| F | -4.61502200 | 1.43024300  | -0.80207000 |
| F | -3.70289400 | 2.03950100  | -3.00923600 |
| F | -2.36926500 | 3.95920300  | -2.23782100 |
| F | -0.40553300 | 3.51324100  | -3.72861900 |
| F | 1.14104100  | 4.79593200  | -2.29379300 |
| F | 2.90395100  | 3.20570100  | -3.05372000 |
| F | 4.20658100  | 3.25053600  | -0.83760100 |
| F | 5.34491100  | 1.06671700  | -1.22165500 |
| F | 5.20051000  | 0.82127000  | 1.19663700  |
| F | 5.18073200  | -1.56798400 | 1.36460900  |
| F | 3.60722300  | -2.37743300 | 3.12601600  |
| F | -2.18855200 | -3.72973300 | 2.69408000  |
| F | -4.06654500 | -3.02647800 | 1.35494100  |
| F | -4.90032100 | -0.79098000 | 0.89993600  |
| F | -3.69464500 | -3.35968400 | -1.06137600 |
| F | -1.64443000 | -4.78529100 | -0.75420200 |
| F | 4.13788200  | -3.32624200 | 0.03107600  |
| F | 4.50108800  | -2.39720100 | -2.16076600 |

|    |                                 |             |                          |
|----|---------------------------------|-------------|--------------------------|
| F  | 4.34426200                      | -0.12422500 | -3.05182400              |
| F  | -2.39417200                     | 0.52494800  | -4.40077500              |
| F  | -3.35938200                     | -1.67070900 | -3.42229200              |
| F  | -1.09513000                     | -2.32244400 | -4.40465500              |
| F  | -0.83601900                     | -4.31221600 | -3.04545200              |
| F  | 1.46368200                      | -4.57425000 | -2.09471500              |
| F  | 2.53758500                      | -2.81420900 | -3.65684500              |
| F  | -1.46326000                     | 4.96988100  | 0.33155500               |
| F  | 1.06444900                      | 5.16031500  | 0.09097800               |
| F  | 3.31678000                      | -0.09426800 | 4.24053600               |
| F  | 1.13060400                      | -0.58212300 | 5.30114700               |
| F  | 0.14400900                      | -2.64969000 | 4.47325000               |
| F  | -2.27134900                     | -1.74609500 | 4.32400700               |
| F  | -4.11615100                     | 0.20596300  | 2.97853000               |
| F  | -4.03240700                     | 2.46366800  | 1.83474600               |
| F  | -2.32228700                     | 2.91285000  | 3.61594100               |
| F  | -0.66527700                     | 4.42403000  | 2.68670000               |
| F  | 0.15996400                      | 1.65735300  | 4.91615500               |
| H  | -5.58614600                     | -1.93845400 | -1.98650000              |
| O  | -5.68492100                     | -0.97478300 | -1.96743600              |
| H  | -6.12324100                     | -0.79787200 | -1.12220000              |
| TS | imaginary vibrational frequency |             | -731.84 cm <sup>-1</sup> |
| C  | -2.81467200                     | -0.23987700 | -0.48443500              |
| C  | -3.10945600                     | 1.13903900  | -0.95868100              |
| C  | -2.56927700                     | 1.53497500  | -2.36646500              |
| C  | -1.58014300                     | 2.80097200  | -2.04844300              |
| C  | -0.15004600                     | 2.77099600  | -2.64918500              |
| C  | 1.06229000                      | 3.48437200  | -1.86002900              |
| C  | 2.33485500                      | 2.44837300  | -2.09247100              |
| C  | 3.32814700                      | 2.11034300  | -0.93476500              |
| C  | 4.07168300                      | 0.62712300  | -0.86244100              |
| C  | 4.00421700                      | 0.25148700  | 0.69542300               |
| C  | 3.84512800                      | -1.24488600 | 1.16699600               |
| C  | 2.83103400                      | -1.45150700 | 2.45711600               |
| C  | 1.64791000                      | -2.06945800 | 1.80672700               |
| C  | 0.36557300                      | -2.08000200 | 2.31244000               |
| C  | -0.67306900                     | -2.54422600 | 1.53125900               |
| C  | -2.00014600                     | -2.35505400 | 2.15438000               |
| C  | -3.09641400                     | -2.06826700 | 1.05443000               |
| C  | -3.30150000                     | -0.55913500 | 0.79447500               |
| C  | -3.03335000                     | -1.36478700 | -1.35887400              |
| C  | -2.82906100                     | -2.64387400 | -0.48095400              |
| C  | -1.46638700                     | -3.40766100 | -0.72254300              |
| C  | -0.43678400                     | -2.99850400 | 0.25909900               |

|   |             |             |             |
|---|-------------|-------------|-------------|
| C | 0.84779600  | -3.01655500 | -0.24006000 |
| C | 1.88431600  | -2.51462200 | 0.52134300  |
| C | 3.28548000  | -2.29006800 | 0.07988800  |
| C | 3.34954500  | -1.99118600 | -1.46315900 |
| C | 3.50957400  | -0.44817400 | -1.87242400 |
| C | 2.14664300  | -0.08502400 | -2.33763600 |
| C | 1.63237000  | 1.18903400  | -2.44748700 |
| C | 0.29794500  | 1.36244100  | -2.74161300 |
| C | -0.51520500 | 0.26835400  | -2.94097000 |
| C | -1.98272700 | 0.30051800  | -3.13464400 |
| C | -2.41005100 | -1.23013600 | -2.76612800 |
| C | -1.04159800 | -2.05603900 | -2.98961200 |
| C | -0.68393000 | -3.30755300 | -2.11575000 |
| C | 0.92289300  | -3.40466200 | -1.67083500 |
| C | 2.00723000  | -2.48208800 | -2.31772400 |
| C | 1.34384800  | -1.18119100 | -2.58371100 |
| C | 0.00276500  | -1.00451200 | -2.85927000 |
| C | -2.47149300 | 2.05540100  | 0.02004100  |
| C | -1.56847700 | 2.85891900  | -0.54052100 |
| C | -0.72246300 | 3.83611300  | 0.19955600  |
| C | 0.77464600  | 3.85716800  | -0.34857400 |
| C | 1.44813200  | 2.91589300  | 0.59452500  |
| C | 2.55582500  | 2.12711300  | 0.33714900  |
| C | 2.90877100  | 1.11833800  | 1.21379900  |
| C | 2.19712700  | 0.93738200  | 2.38508800  |
| C | 2.31864400  | -0.23418400 | 3.29685800  |
| C | 0.81424000  | -0.27093300 | 4.00457600  |
| C | -0.11079200 | -1.48130300 | 3.58873600  |
| C | -1.65871000 | -1.25174100 | 3.25309000  |
| C | -1.90697900 | 0.12629600  | 2.72838800  |
| C | -3.14109800 | 0.46005400  | 1.92618700  |
| C | -2.85601500 | 1.95470400  | 1.46536400  |
| C | -1.71667300 | 2.48666000  | 2.40574300  |
| C | -0.60663600 | 3.42670400  | 1.73445700  |
| C | 0.71592600  | 2.72001000  | 1.75216600  |
| C | 1.10261000  | 1.73842200  | 2.64967000  |
| C | 0.18952900  | 1.16195200  | 3.68073400  |
| C | -1.14747200 | 1.18919400  | 2.99265100  |
| F | -4.50407500 | 1.35454600  | -0.99647700 |
| F | -3.60398200 | 2.01259500  | -3.11815200 |
| F | -2.19604700 | 3.93799100  | -2.51813900 |
| F | -0.20848700 | 3.32703600  | -3.90839000 |
| F | 1.35051700  | 4.63907800  | -2.51034500 |
| F | 3.05196900  | 2.93187700  | -3.15877000 |



|    |             |             |             |
|----|-------------|-------------|-------------|
| F  | 4.32423300  | 3.05432900  | -0.92158300 |
| F  | 5.38048100  | 0.80919400  | -1.17469900 |
| F  | 5.18640300  | 0.70078700  | 1.25135700  |
| F  | 5.07858200  | -1.67578400 | 1.53600200  |
| F  | 3.44548500  | -2.33560000 | 3.30914000  |
| F  | -2.36833200 | -3.50456600 | 2.81718000  |
| F  | -4.22897000 | -2.67300100 | 1.50294500  |
| F  | -5.05092700 | -0.59790600 | 0.58044200  |
| F  | -3.81225800 | -3.54965200 | -0.74237000 |
| F  | -1.74140300 | -4.74600700 | -0.52419500 |
| F  | 3.98918900  | -3.46207200 | 0.27390100  |
| F  | 4.42220900  | -2.65807900 | -1.95876500 |
| F  | 4.35411600  | -0.42442500 | -2.96472800 |
| F  | -2.27054400 | 0.46721700  | -4.47233900 |
| F  | -3.31432800 | -1.66000400 | -3.69891400 |
| F  | -1.07100600 | -2.48347900 | -4.30100300 |
| F  | -0.98255400 | -4.41354700 | -2.84192200 |
| F  | 1.29523700  | -4.71447500 | -1.82747900 |
| F  | 2.46314700  | -3.06617400 | -3.47157200 |
| F  | -1.26427900 | 5.08986900  | 0.08287900  |
| F  | 1.26618100  | 5.12855200  | -0.14711100 |
| F  | 3.22103900  | 0.01420000  | 4.30062900  |
| F  | 1.00075000  | -0.34303100 | 5.34713200  |
| F  | -0.04331100 | -2.41393200 | 4.59910900  |
| F  | -2.42304400 | -1.45368800 | 4.37066200  |
| F  | -4.23406100 | 0.43935100  | 2.75616700  |
| F  | -3.99189200 | 2.70317500  | 1.64448500  |
| F  | -2.29925700 | 3.20373400  | 3.42003100  |
| F  | -0.54738700 | 4.58555100  | 2.46857300  |
| F  | 0.13908000  | 1.91448200  | 4.83489600  |
| H  | -5.02406700 | -1.04204100 | -0.61590500 |
| O  | -4.65947900 | -1.41760800 | -1.61063800 |
| H  | -4.88879200 | -0.74721000 | -2.28388300 |
| PC |             |             |             |
| C  | -3.04592800 | -0.26169600 | -0.50882500 |
| C  | -3.23767400 | 1.15877400  | -0.94078300 |
| C  | -2.64545300 | 1.52643600  | -2.34621100 |
| C  | -1.64283600 | 2.79008800  | -2.01500900 |
| C  | -0.21419900 | 2.78597700  | -2.62512100 |
| C  | 0.99971300  | 3.51133800  | -1.84262500 |
| C  | 2.28583600  | 2.49650700  | -2.09686400 |
| C  | 3.30128400  | 2.16246500  | -0.95367800 |
| C  | 4.06827900  | 0.68850200  | -0.89977900 |
| C  | 4.02388100  | 0.29865900  | 0.65602300  |

|   |             |             |             |
|---|-------------|-------------|-------------|
| C | 3.88745300  | -1.20392400 | 1.11901900  |
| C | 2.89193700  | -1.43475000 | 2.41976900  |
| C | 1.70802900  | -2.06642700 | 1.78165900  |
| C | 0.43271900  | -2.10675400 | 2.30612300  |
| C | -0.60918200 | -2.59138100 | 1.53849900  |
| C | -1.94145000 | -2.40729500 | 2.16193900  |
| C | -2.97858200 | -2.05895000 | 1.03683700  |
| C | -3.01925500 | -0.58145300 | 0.78268000  |
| C | -3.16810400 | -1.44942900 | -1.41790400 |
| C | -2.78603500 | -2.68628200 | -0.46943000 |
| C | -1.41531700 | -3.42969900 | -0.72805300 |
| C | -0.38138500 | -3.02078100 | 0.25356400  |
| C | 0.89779500  | -3.01027500 | -0.26197000 |
| C | 1.93561100  | -2.49737600 | 0.48990700  |
| C | 3.32834500  | -2.24765900 | 0.03215700  |
| C | 3.37180300  | -1.93506400 | -1.50864200 |
| C | 3.50731000  | -0.38592700 | -1.90854800 |
| C | 2.13219600  | -0.03602800 | -2.34693800 |
| C | 1.59536700  | 1.23000800  | -2.44570000 |
| C | 0.25364900  | 1.38549600  | -2.71832700 |
| C | -0.55092100 | 0.28259500  | -2.90080200 |
| C | -2.02091900 | 0.28942700  | -3.10936800 |
| C | -2.40080400 | -1.26146500 | -2.77687700 |
| C | -1.01929400 | -2.05097600 | -2.98431300 |
| C | -0.64450800 | -3.30416300 | -2.12456600 |
| C | 0.96474900  | -3.38296900 | -1.69769000 |
| C | 2.02587900  | -2.43530900 | -2.34697100 |
| C | 1.34086300  | -1.14015100 | -2.58251700 |
| C | -0.00632800 | -0.97943800 | -2.82960900 |
| C | -2.50400200 | 2.01211900  | 0.05450500  |
| C | -1.60474800 | 2.81540200  | -0.50787000 |
| C | -0.76263600 | 3.80080300  | 0.23530400  |
| C | 0.72554400  | 3.86051800  | -0.32534000 |
| C | 1.42881900  | 2.92505300  | 0.60308200  |
| C | 2.54591500  | 2.15663500  | 0.32803600  |
| C | 2.92356900  | 1.14678900  | 1.19357800  |
| C | 2.22952300  | 0.94627100  | 2.37260800  |
| C | 2.37765700  | -0.23065700 | 3.27433500  |
| C | 0.88500500  | -0.29391100 | 4.00349300  |
| C | -0.03205200 | -1.51840000 | 3.59216900  |
| C | -1.58847700 | -1.30723600 | 3.28535200  |
| C | -1.85540200 | 0.08493900  | 2.80089500  |
| C | -3.03933000 | 0.38616900  | 1.93083400  |
| C | -2.83538800 | 1.89230200  | 1.51333500  |

|   |             |             |             |
|---|-------------|-------------|-------------|
| C | -1.70024500 | 2.44432900  | 2.45042900  |
| C | -0.61654600 | 3.39598500  | 1.76831300  |
| C | 0.71581900  | 2.71026300  | 1.76917200  |
| C | 1.12859400  | 1.73065800  | 2.65803700  |
| C | 0.24396300  | 1.14029200  | 3.70738900  |
| C | -1.10671600 | 1.15847900  | 3.05170100  |
| F | -4.58455300 | 1.44989300  | -0.92811100 |
| F | -3.65240200 | 2.00869000  | -3.12080700 |
| F | -2.26934200 | 3.93401500  | -2.44924700 |
| F | -0.28791400 | 3.34524900  | -3.88105200 |
| F | 1.26286500  | 4.67639800  | -2.48389400 |
| F | 2.98204900  | 2.99637500  | -3.16888200 |
| F | 4.28338700  | 3.12048700  | -0.94608900 |
| F | 5.37020400  | 0.89153600  | -1.22614300 |
| F | 5.20686200  | 0.75743400  | 1.20179500  |
| F | 5.13037200  | -1.62210500 | 1.47029900  |
| F | 3.52898300  | -2.31741300 | 3.25649800  |
| F | -2.35411300 | -3.55291400 | 2.79924200  |
| F | -4.22300400 | -2.48142800 | 1.48717900  |
| F | -5.96306500 | -0.46661400 | 0.66311300  |
| F | -3.75757100 | -3.62947800 | -0.64819400 |
| F | -1.66197600 | -4.77728900 | -0.54465900 |
| F | 4.04928300  | -3.41189000 | 0.20832600  |
| F | 4.44704100  | -2.58405700 | -2.02168300 |
| F | 4.33433300  | -0.34362600 | -3.01309600 |
| F | -2.28603200 | 0.47541400  | -4.44828000 |
| F | -3.24260900 | -1.71557000 | -3.76611900 |
| F | -0.99592000 | -2.46726500 | -4.30237800 |
| F | -0.93756100 | -4.40751600 | -2.85914000 |
| F | 1.35772100  | -4.68467500 | -1.87019000 |
| F | 2.47165800  | -2.99504500 | -3.51665400 |
| F | -1.33735700 | 5.04028700  | 0.12677400  |
| F | 1.18995700  | 5.14035400  | -0.11447800 |
| F | 3.29089500  | 0.02166400  | 4.26711400  |
| F | 1.09316500  | -0.37934400 | 5.34199200  |
| F | 0.06609800  | -2.45523900 | 4.59614000  |
| F | -2.32933500 | -1.54649600 | 4.41021000  |
| F | -4.20843400 | 0.23875700  | 2.64565900  |
| F | -3.99528600 | 2.58738300  | 1.73635700  |
| F | -2.29378700 | 3.15889300  | 3.45983400  |
| F | -0.56389100 | 4.55869900  | 2.49704600  |
| F | 0.22245200  | 1.88239600  | 4.86881000  |
| O | -4.54731700 | -1.49844700 | -1.69059000 |
| H | -4.68559400 | -2.04438800 | -2.48456900 |

|    |             |             |             |
|----|-------------|-------------|-------------|
| H  | -5.72476300 | -1.36638600 | 0.76119200  |
| IP |             |             |             |
| C  | -3.12969300 | -0.48106200 | -0.29232300 |
| C  | -3.43291100 | 0.90649100  | -0.76065500 |
| C  | -2.95694200 | 1.25592900  | -2.21254900 |
| C  | -2.01828000 | 2.59151300  | -1.99070500 |
| C  | -0.63155200 | 2.65112800  | -2.68781200 |
| C  | 0.57841300  | 3.47879200  | -2.00697400 |
| C  | 1.90893100  | 2.53569600  | -2.30549000 |
| C  | 3.00911500  | 2.30802700  | -1.21575400 |
| C  | 3.86985400  | 0.88734500  | -1.15855900 |
| C  | 3.94320900  | 0.55535800  | 0.40975500  |
| C  | 3.92994200  | -0.93330400 | 0.93214300  |
| C  | 3.03102600  | -1.17417400 | 2.29949500  |
| C  | 1.85359900  | -1.90073100 | 1.75868000  |
| C  | 0.61764500  | -1.99918500 | 2.36306600  |
| C  | -0.43565200 | -2.57570100 | 1.67919800  |
| C  | -1.73647900 | -2.45055000 | 2.37697300  |
| C  | -2.86790800 | -2.21466200 | 1.31326900  |
| C  | -3.00884200 | -0.75053700 | 1.00558500  |
| C  | -3.23354300 | -1.70664500 | -1.15115900 |
| C  | -2.72320600 | -2.88178400 | -0.18556800 |
| C  | -1.32423600 | -3.54757600 | -0.50223000 |
| C  | -0.26005000 | -3.03811700 | 0.39748100  |
| C  | 0.98311000  | -2.97047500 | -0.19628300 |
| C  | 2.02984900  | -2.36665000 | 0.47103300  |
| C  | 3.37392200  | -2.05015500 | -0.08115100 |
| C  | 3.30553700  | -1.79535300 | -1.63161400 |
| C  | 3.31936000  | -0.25726400 | -2.09360000 |
| C  | 1.90156900  | -0.00925200 | -2.45966600 |
| C  | 1.28076500  | 1.21700900  | -2.56935300 |
| C  | -0.08228800 | 1.27937300  | -2.76307100 |
| C  | -0.82485800 | 0.12300000  | -2.85483600 |
| C  | -2.30247400 | 0.03106400  | -2.97070800 |
| C  | -2.56169400 | -1.52639600 | -2.56166000 |
| C  | -1.14856400 | -2.23673000 | -2.82615900 |
| C  | -0.64585000 | -3.43055500 | -1.94707000 |
| C  | 0.98778300  | -3.39380700 | -1.61924500 |
| C  | 1.94630000  | -2.40924500 | -2.36638100 |
| C  | 1.16867500  | -1.16801800 | -2.60538800 |
| C  | -0.19819700 | -1.09974200 | -2.77331300 |
| C  | -2.69948700 | 1.84247700  | 0.15463500  |
| C  | -1.89131400 | 2.67922200  | -0.49057200 |
| C  | -1.07089700 | 3.74158400  | 0.16524000  |

|   |             |             |             |
|---|-------------|-------------|-------------|
| C | 0.37455700  | 3.86962900  | -0.48867700 |
| C | 1.18904800  | 3.01504600  | 0.42663900  |
| C | 2.33366400  | 2.30566100  | 0.10950000  |
| C | 2.82547000  | 1.35537500  | 0.98502600  |
| C | 2.21650600  | 1.15797800  | 2.21069900  |
| C | 2.49312600  | 0.02825800  | 3.14199200  |
| C | 1.05400000  | -0.09797600 | 3.96435900  |
| C | 0.19395300  | -1.39092000 | 3.65440600  |
| C | -1.38941400 | -1.28921200 | 3.43887300  |
| C | -1.77729600 | 0.06585400  | 2.92862600  |
| C | -3.02178500 | 0.26078800  | 2.11439800  |
| C | -2.93569000 | 1.75933500  | 1.63323700  |
| C | -1.78759400 | 2.41579300  | 2.48014100  |
| C | -0.80857500 | 3.40474600  | 1.69957300  |
| C | 0.56169100  | 2.80230800  | 1.64143700  |
| C | 1.08650000  | 1.88327900  | 2.53576500  |
| C | 0.30603800  | 1.28095800  | 3.65828300  |
| C | -1.08146900 | 1.19170700  | 3.09003500  |
| F | -4.79744700 | 1.11283900  | -0.66737600 |
| F | -4.03976000 | 1.64541800  | -2.93551300 |
| F | -2.74183000 | 3.67633300  | -2.42588700 |
| F | -0.81601400 | 3.15777700  | -3.95473900 |
| F | 0.72807400  | 4.63227500  | -2.70357200 |
| F | 2.50835400  | 3.03806900  | -3.43327800 |
| F | 3.92669600  | 3.32442000  | -1.30219000 |
| F | 5.13462300  | 1.15777900  | -1.57110700 |
| F | 5.12540900  | 1.10660700  | 0.86420800  |
| F | 5.21574600  | -1.26107700 | 1.21972100  |
| F | 3.77197800  | -1.98270000 | 3.12553300  |
| F | -2.03158100 | -3.59419100 | 3.07978100  |
| F | -4.03927800 | -2.68359900 | 1.85376700  |
| F | -3.64149200 | -3.88738900 | -0.27832400 |
| F | -1.47158000 | -4.89947400 | -0.25551800 |
| F | 4.17728200  | -3.15996000 | 0.08997400  |
| F | 4.38723600  | -2.39674100 | -2.18726300 |
| F | 4.07657700  | -0.20734500 | -3.24689500 |
| F | -2.66024300 | 0.15161200  | -4.29547200 |
| F | -3.43080100 | -2.06916200 | -3.47903900 |
| F | -1.17596800 | -2.70155100 | -4.12807900 |
| F | -0.91125400 | -4.57735700 | -2.62354700 |
| F | 1.45279900  | -4.67438000 | -1.77063000 |
| F | 2.35564200  | -2.98567000 | -3.54148300 |
| F | -1.72861200 | 4.93833200  | 0.04954200  |
| F | 0.76871600  | 5.18262600  | -0.35219800 |

|   |             |             |             |
|---|-------------|-------------|-------------|
| F | 3.44633000  | 0.37498700  | 4.06633900  |
| F | 1.34692200  | -0.11747300 | 5.28974400  |
| F | 0.41142100  | -2.27993900 | 4.68281700  |
| F | -2.04223600 | -1.53209900 | 4.61635900  |
| F | -4.15318100 | 0.07341400  | 2.88427000  |
| F | -4.12509200 | 2.39022100  | 1.89920300  |
| F | -2.36717400 | 3.13210800  | 3.49654300  |
| F | -0.78697200 | 4.59556900  | 2.38317000  |
| F | 0.30762400  | 2.06632600  | 4.79153400  |
| O | -4.62104700 | -1.83381900 | -1.34003500 |
| H | -4.77834700 | -2.45855300 | -2.06937200 |

M06-PCM/6-31G(d)

C<sub>1</sub> isomer

|   |             |             |             |
|---|-------------|-------------|-------------|
| C | -3.00197100 | -0.43913300 | -1.00730000 |
| C | -3.25706700 | 1.00905000  | -1.19343900 |
| C | -2.53108300 | 1.70556300  | -2.39284700 |
| C | -1.73693200 | 2.93589400  | -1.67718300 |
| C | -0.26797800 | 3.20935800  | -2.06446700 |
| C | 0.73428300  | 3.85510100  | -0.98733900 |
| C | 2.14554200  | 3.04277400  | -1.23963800 |
| C | 3.03965900  | 2.56109600  | -0.06115400 |
| C | 3.95573000  | 1.19268600  | -0.18544300 |
| C | 3.75891800  | 0.48661900  | 1.22949500  |
| C | 3.74392100  | -1.07395100 | 1.36707500  |
| C | 2.62803900  | -1.65559000 | 2.42404200  |
| C | 1.61060400  | -2.20549600 | 1.50411100  |
| C | 0.29874200  | -2.46789000 | 1.81190100  |
| C | -0.56737500 | -2.87336900 | 0.82466300  |
| C | -1.96633100 | -2.97267500 | 1.28848400  |
| C | -2.96299000 | -2.59248100 | 0.12535200  |
| C | -3.58833800 | -1.13146100 | 0.18587100  |
| C | -2.34150100 | -1.24445800 | -1.82359600 |
| C | -2.35086800 | -2.67230600 | -1.38893800 |
| C | -0.96664000 | -3.32796200 | -1.62433500 |
| C | -0.11787200 | -3.04103400 | -0.45669900 |
| C | 1.19456600  | -2.78765200 | -0.76700300 |
| C | 2.04604800  | -2.32998500 | 0.20891100  |
| C | 3.44870300  | -1.89937400 | 0.03437700  |
| C | 3.65833600  | -1.28244800 | -1.38298500 |
| C | 3.65659000  | 0.30995300  | -1.44421500 |
| C | 2.31931700  | 0.61860000  | -1.98772000 |
| C | 1.66249100  | 1.82237900  | -1.91782100 |
| C | 0.36878400  | 1.91630100  | -2.36310900 |
| C | -0.25578700 | 0.82243100  | -2.90155000 |

|   |             |             |             |
|---|-------------|-------------|-------------|
| C | -1.68181600 | 0.71804000  | -3.27457300 |
| C | -1.87916100 | -0.84986000 | -3.17964500 |
| C | -0.46214500 | -1.46438300 | -3.48756400 |
| C | -0.04675400 | -2.83336400 | -2.84436000 |
| C | 1.48502200  | -2.85347000 | -2.21353900 |
| C | 2.50874600  | -1.71108900 | -2.49006400 |
| C | 1.71363800  | -0.46739100 | -2.57071900 |
| C | 0.41720500  | -0.37169000 | -3.01171300 |
| C | -2.72927500 | 1.65080700  | 0.03894200  |
| C | -1.86260500 | 2.62213100  | -0.21706100 |
| C | -1.27920200 | 3.52593600  | 0.80587400  |
| C | 0.23078300  | 3.84833400  | 0.50122900  |
| C | 0.90924200  | 2.80202000  | 1.30669000  |
| C | 2.12708000  | 2.21086500  | 1.05122900  |
| C | 2.50373800  | 1.08337100  | 1.74163800  |
| C | 1.70292400  | 0.58469700  | 2.74548300  |
| C | 1.87158200  | -0.72819200 | 3.41533300  |
| C | 0.32007300  | -1.06856600 | 3.87747600  |
| C | -0.38568000 | -2.23860500 | 3.10213300  |
| C | -1.88539000 | -2.10976600 | 2.60605000  |
| C | -2.22544100 | -0.69477100 | 2.30962200  |
| C | -3.42948200 | -0.32758400 | 1.50732500  |
| C | -3.27348800 | 1.23205400  | 1.36243800  |
| C | -2.33315100 | 1.67001700  | 2.52686600  |
| C | -1.29911400 | 2.83894700  | 2.22361100  |
| C | 0.08738100  | 2.28943600  | 2.28607400  |
| C | 0.49812700  | 1.19027000  | 3.01205100  |
| C | -0.43748300 | 0.31678500  | 3.76143100  |
| C | -1.65609000 | 0.35306800  | 2.89449100  |
| F | -4.60455300 | 1.21564500  | -1.27728500 |
| F | -3.47358000 | 2.24407200  | -3.18874700 |
| F | -2.44180100 | 4.07488200  | -1.91433200 |
| F | -0.25755700 | 4.00342600  | -3.16956500 |
| F | 0.93357100  | 5.13686000  | -1.33683000 |
| F | 2.88896100  | 3.80589500  | -2.08138100 |
| F | 3.88121700  | 3.56266300  | 0.30032900  |
| F | 5.24318300  | 1.57233000  | -0.26927200 |
| F | 4.77107900  | 0.93676200  | 2.02915600  |
| F | 4.96048300  | -1.44392800 | 1.80578100  |
| F | 3.23240700  | -2.65037800 | 3.12298500  |
| F | -2.23166400 | -4.25880200 | 1.65099000  |
| F | -3.98223300 | -3.46922200 | 0.18797100  |
| F | -4.92592000 | -1.24745100 | -0.04891800 |
| F | -3.25385500 | -3.33273600 | -2.16377000 |

|   |             |             |             |
|---|-------------|-------------|-------------|
| F | -1.14620500 | -4.66978200 | -1.76069400 |
| F | 4.22980100  | -3.01803100 | 0.09551600  |
| F | 4.84916100  | -1.70755600 | -1.83965500 |
| F | 4.57614900  | 0.65565400  | -2.39323800 |
| F | -1.85172900 | 1.07287600  | -4.57779400 |
| F | -2.78292600 | -1.29160800 | -4.08701000 |
| F | -0.34650300 | -1.58944000 | -4.83846300 |
| F | -0.10379400 | -3.76908000 | -3.80549600 |
| F | 2.03303100  | -4.04569100 | -2.55829100 |
| F | 3.16049300  | -1.95796300 | -3.65347200 |
| F | -1.99682600 | 4.67576800  | 0.81850900  |
| F | 0.49841200  | 5.07091000  | 1.03888100  |
| F | 2.60278800  | -0.60475600 | 4.55192100  |
| F | 0.35236100  | -1.40412600 | 5.17900700  |
| F | -0.30001200 | -3.35627700 | 3.87495300  |
| F | -2.74471300 | -2.59177700 | 3.53631300  |
| F | -4.52922900 | -0.57371700 | 2.27333300  |
| F | -4.49036400 | 1.81783600  | 1.49424000  |
| F | -3.11035100 | 2.05740400  | 3.56897600  |
| F | -1.47830400 | 3.81290700  | 3.15170700  |
| F | -0.73884500 | 0.79403700  | 5.00081000  |

C<sub>1</sub>-S<sub>N</sub>2'-C60-F<sub>a</sub>

RC

|   |             |             |             |
|---|-------------|-------------|-------------|
| C | -2.66045000 | -1.45199100 | 0.98614300  |
| C | -2.78084900 | -2.29804000 | -0.22443100 |
| C | -1.76014200 | -3.47643500 | -0.36267400 |
| C | -1.07528300 | -3.20351600 | -1.81426600 |
| C | 0.45764400  | -3.32013100 | -1.95582900 |
| C | 1.22609900  | -2.43118600 | -3.05048700 |
| C | 2.60616900  | -1.97295400 | -2.27265800 |
| C | 3.17683100  | -0.53209900 | -2.39334000 |
| C | 4.01031900  | 0.16617900  | -1.14877400 |
| C | 3.45043800  | 1.65582000  | -1.11989400 |
| C | 3.31106400  | 2.45501600  | 0.22088200  |
| C | 1.95178900  | 3.37257500  | 0.33524100  |
| C | 1.13870200  | 2.58792100  | 1.28741500  |
| C | -0.22504200 | 2.67166000  | 1.44736700  |
| C | -0.85699900 | 1.77272500  | 2.27561500  |
| C | -2.32546200 | 1.87790500  | 2.22034800  |
| C | -3.00946700 | 0.47474100  | 2.42709900  |
| C | -3.54223300 | -0.24689400 | 1.11381800  |
| C | -1.88679200 | -1.66579000 | 2.03838700  |
| C | -2.07964600 | -0.66556600 | 3.13013900  |
| C | -0.72082000 | -0.26329600 | 3.75728400  |



|   |             |             |             |
|---|-------------|-------------|-------------|
| C | -0.14036700 | 0.83060400  | 2.95979500  |
| C | 1.22116100  | 0.75569000  | 2.81182500  |
| C | 1.85169200  | 1.61074100  | 1.93980400  |
| C | 3.27969800  | 1.58655600  | 1.55716900  |
| C | 3.83928800  | 0.12846000  | 1.60829800  |
| C | 3.95057000  | -0.61696900 | 0.20425000  |
| C | 2.79429300  | -1.53382400 | 0.22402500  |
| C | 2.21566600  | -2.14729500 | -0.85890900 |
| C | 1.06839100  | -2.87888300 | -0.69137300 |
| C | 0.51637300  | -3.02003300 | 0.55455300  |
| C | -0.79409700 | -3.62448200 | 0.87187900  |
| C | -1.10303500 | -2.90989300 | 2.25132400  |
| C | 0.30701500  | -2.58226300 | 2.87541800  |
| C | 0.48016600  | -1.32849800 | 3.80459000  |
| C | 1.82419500  | -0.41573000 | 3.48173800  |
| C | 2.94952300  | -0.91665300 | 2.52762000  |
| C | 2.27153100  | -1.71116100 | 1.48144300  |
| C | 1.12054100  | -2.44114100 | 1.64599000  |
| C | -2.51416100 | -1.38275700 | -1.36598600 |
| C | -1.55335900 | -1.82735400 | -2.16584700 |
| C | -1.16254100 | -1.19274800 | -3.44840900 |
| C | 0.39590900  | -1.24941700 | -3.67240100 |
| C | 0.80769400  | 0.06147100  | -3.11201500 |
| C | 2.01238300  | 0.37406400  | -2.51942000 |
| C | 2.15013500  | 1.54712900  | -1.81756500 |
| C | 1.11139700  | 2.44719500  | -1.76336500 |
| C | 1.04646200  | 3.64504500  | -0.89484700 |
| C | -0.58815600 | 3.85143400  | -0.72778800 |
| C | -1.18503800 | 3.52505300  | 0.69650200  |
| C | -2.51019200 | 2.66456400  | 0.87234100  |
| C | -2.67177200 | 1.72633400  | -0.26418700 |
| C | -3.63733100 | 0.59355600  | -0.18903800 |
| C | -3.36713200 | -0.16968300 | -1.53720400 |
| C | -2.69198800 | 0.87471500  | -2.48144600 |
| C | -1.54581000 | 0.33694100  | -3.44622900 |
| C | -0.24635000 | 0.94507000  | -3.03732400 |
| C | -0.08046500 | 2.14055400  | -2.37037200 |
| C | -1.21052700 | 2.97284500  | -1.89127000 |
| C | -2.20264600 | 1.92653400  | -1.49034500 |
| F | -4.06100900 | -2.76906100 | -0.30378200 |
| F | -2.46345500 | -4.61982700 | -0.46077500 |
| F | -1.63196800 | -4.07124900 | -2.70240600 |
| F | 0.76301500  | -4.62476600 | -2.19402000 |
| F | 1.57773200  | -3.24737800 | -4.05814200 |

|    |                                 |             |                          |
|----|---------------------------------|-------------|--------------------------|
| F  | 3.56755000                      | -2.86693700 | -2.62139400              |
| F  | 3.97326500                      | -0.45548700 | -3.48952200              |
| F  | 5.30487700                      | 0.22999800  | -1.50929600              |
| F  | 4.27464400                      | 2.38946400  | -1.92562300              |
| F  | 4.37117900                      | 3.27995300  | 0.30204300               |
| F  | 2.32262300                      | 4.55967300  | 0.88178500               |
| F  | -2.74662000                     | 2.69113700  | 3.23120900               |
| F  | -4.06954800                     | 0.67587900  | 3.23234200               |
| F  | -4.79613700                     | -0.71095000 | 1.38104100               |
| F  | -2.82140400                     | -1.25648800 | 4.10702200               |
| F  | -0.94826600                     | 0.15695100  | 5.03213600               |
| F  | 3.96800900                      | 2.30009400  | 2.49794000               |
| F  | 5.07469600                      | 0.18894900  | 2.13525200               |
| F  | 5.08044700                      | -1.38281300 | 0.26219900               |
| F  | -0.64678600                     | -4.95419000 | 1.12389900               |
| F  | -1.79872000                     | -3.72537600 | 3.07904800               |
| F  | 0.72082400                      | -3.67687100 | 3.57202900               |
| F  | 0.58382800                      | -1.77094700 | 5.06860200               |
| F  | 2.36269700                      | -0.08082400 | 4.68133300               |
| F  | 3.83387000                      | -1.67294800 | 3.22532400               |
| F  | -1.79272400                     | -1.84518400 | -4.45589000              |
| F  | 0.61005700                      | -1.25077600 | -5.01745600              |
| F  | 1.51604700                      | 4.73884500  | -1.55012100              |
| F  | -0.83022800                     | 5.14768100  | -0.99538300              |
| F  | -1.37326900                     | 4.70881000  | 1.34446700               |
| F  | -3.62509900                     | 3.42566300  | 0.99808000               |
| F  | -4.89155000                     | 1.12486900  | -0.23854700              |
| F  | -4.54784500                     | -0.58486100 | -2.06268600              |
| F  | -3.65731800                     | 1.43308500  | -3.25263000              |
| F  | -1.86456900                     | 0.68208100  | -4.72042800              |
| F  | -1.69690700                     | 3.75615600  | -2.89362300              |
| H  | -3.80682900                     | 5.17675100  | -0.47590200              |
| O  | -3.54220200                     | 4.69392800  | -1.26893400              |
| H  | -3.12291500                     | 5.35609600  | -1.83252800              |
| TS | imaginary vibrational frequency |             | -807.08 cm <sup>-1</sup> |
| C  | -2.66045000                     | -1.45199100 | 0.98614300               |
| C  | -2.78084900                     | -2.29804000 | -0.22443100              |
| C  | -1.76014200                     | -3.47643500 | -0.36267400              |
| C  | -1.07528300                     | -3.20351600 | -1.81426600              |
| C  | 0.45764400                      | -3.32013100 | -1.95582900              |
| C  | 1.22609900                      | -2.43118600 | -3.05048700              |
| C  | 2.60616900                      | -1.97295400 | -2.27265800              |
| C  | 3.17683100                      | -0.53209900 | -2.39334000              |
| C  | 4.01031900                      | 0.16617900  | -1.14877400              |

|   |             |             |             |
|---|-------------|-------------|-------------|
| C | 3.45043800  | 1.65582000  | -1.11989400 |
| C | 3.31106400  | 2.45501600  | 0.22088200  |
| C | 1.95178900  | 3.37257500  | 0.33524100  |
| C | 1.13870200  | 2.58792100  | 1.28741500  |
| C | -0.22504200 | 2.67166000  | 1.44736700  |
| C | -0.85699900 | 1.77272500  | 2.27561500  |
| C | -2.32546200 | 1.87790500  | 2.22034800  |
| C | -3.00946700 | 0.47474100  | 2.42709900  |
| C | -3.54223300 | -0.24689400 | 1.11381800  |
| C | -1.88679200 | -1.66579000 | 2.03838700  |
| C | -2.07964600 | -0.66556600 | 3.13013900  |
| C | -0.72082000 | -0.26329600 | 3.75728400  |
| C | -0.14036700 | 0.83060400  | 2.95979500  |
| C | 1.22116100  | 0.75569000  | 2.81182500  |
| C | 1.85169200  | 1.61074100  | 1.93980400  |
| C | 3.27969800  | 1.58655600  | 1.55716900  |
| C | 3.83928800  | 0.12846000  | 1.60829800  |
| C | 3.95057000  | -0.61696900 | 0.20425000  |
| C | 2.79429300  | -1.53382400 | 0.22402500  |
| C | 2.21566600  | -2.14729500 | -0.85890900 |
| C | 1.06839100  | -2.87888300 | -0.69137300 |
| C | 0.51637300  | -3.02003300 | 0.55455300  |
| C | -0.79409700 | -3.62448200 | 0.87187900  |
| C | -1.10303500 | -2.90989300 | 2.25132400  |
| C | 0.30701500  | -2.58226300 | 2.87541800  |
| C | 0.48016600  | -1.32849800 | 3.80459000  |
| C | 1.82419500  | -0.41573000 | 3.48173800  |
| C | 2.94952300  | -0.91665300 | 2.52762000  |
| C | 2.27153100  | -1.71116100 | 1.48144300  |
| C | 1.12054100  | -2.44114100 | 1.64599000  |
| C | -2.51416100 | -1.38275700 | -1.36598600 |
| C | -1.55335900 | -1.82735400 | -2.16584700 |
| C | -1.16254100 | -1.19274800 | -3.44840900 |
| C | 0.39590900  | -1.24941700 | -3.67240100 |
| C | 0.80769400  | 0.06147100  | -3.11201500 |
| C | 2.01238300  | 0.37406400  | -2.51942000 |
| C | 2.15013500  | 1.54712900  | -1.81756500 |
| C | 1.11139700  | 2.44719500  | -1.76336500 |
| C | 1.04646200  | 3.64504500  | -0.89484700 |
| C | -0.58815600 | 3.85143400  | -0.72778800 |
| C | -1.18503800 | 3.52505300  | 0.69650200  |
| C | -2.51019200 | 2.66456400  | 0.87234100  |
| C | -2.67177200 | 1.72633400  | -0.26418700 |
| C | -3.63733100 | 0.59355600  | -0.18903800 |

|   |             |             |             |
|---|-------------|-------------|-------------|
| C | -3.36713200 | -0.16968300 | -1.53720400 |
| C | -2.69198800 | 0.87471500  | -2.48144600 |
| C | -1.54581000 | 0.33694100  | -3.44622900 |
| C | -0.24635000 | 0.94507000  | -3.03732400 |
| C | -0.08046500 | 2.14055400  | -2.37037200 |
| C | -1.21052700 | 2.97284500  | -1.89127000 |
| C | -2.20264600 | 1.92653400  | -1.49034500 |
| F | -4.06100900 | -2.76906100 | -0.30378200 |
| F | -2.46345500 | -4.61982700 | -0.46077500 |
| F | -1.63196800 | -4.07124900 | -2.70240600 |
| F | 0.76301500  | -4.62476600 | -2.19402000 |
| F | 1.57773200  | -3.24737800 | -4.05814200 |
| F | 3.56755000  | -2.86693700 | -2.62139400 |
| F | 3.97326500  | -0.45548700 | -3.48952200 |
| F | 5.30487700  | 0.22999800  | -1.50929600 |
| F | 4.27464400  | 2.38946400  | -1.92562300 |
| F | 4.37117900  | 3.27995300  | 0.30204300  |
| F | 2.32262300  | 4.55967300  | 0.88178500  |
| F | -2.74662000 | 2.69113700  | 3.23120900  |
| F | -4.06954800 | 0.67587900  | 3.23234200  |
| F | -4.79613700 | -0.71095000 | 1.38104100  |
| F | -2.82140400 | -1.25648800 | 4.10702200  |
| F | -0.94826600 | 0.15695100  | 5.03213600  |
| F | 3.96800900  | 2.30009400  | 2.49794000  |
| F | 5.07469600  | 0.18894900  | 2.13525200  |
| F | 5.08044700  | -1.38281300 | 0.26219900  |
| F | -0.64678600 | -4.95419000 | 1.12389900  |
| F | -1.79872000 | -3.72537600 | 3.07904800  |
| F | 0.72082400  | -3.67687100 | 3.57202900  |
| F | 0.58382800  | -1.77094700 | 5.06860200  |
| F | 2.36269700  | -0.08082400 | 4.68133300  |
| F | 3.83387000  | -1.67294800 | 3.22532400  |
| F | -1.79272400 | -1.84518400 | -4.45589000 |
| F | 0.61005700  | -1.25077600 | -5.01745600 |
| F | 1.51604700  | 4.73884500  | -1.55012100 |
| F | -0.83022800 | 5.14768100  | -0.99538300 |
| F | -1.37326900 | 4.70881000  | 1.34446700  |
| F | -3.62509900 | 3.42566300  | 0.99808000  |
| F | -4.89155000 | 1.12486900  | -0.23854700 |
| F | -4.54784500 | -0.58486100 | -2.06268600 |
| F | -3.65731800 | 1.43308500  | -3.25263000 |
| F | -1.86456900 | 0.68208100  | -4.72042800 |
| F | -1.69690700 | 3.75615600  | -2.89362300 |
| H | -3.80682900 | 5.17675100  | -0.47590200 |

|    |             |             |             |
|----|-------------|-------------|-------------|
| O  | -3.54220200 | 4.69392800  | -1.26893400 |
| H  | -3.12291500 | 5.35609600  | -1.83252800 |
| PC |             |             |             |
| C  | -2.66045000 | -1.45199100 | 0.98614300  |
| C  | -2.78084900 | -2.29804000 | -0.22443100 |
| C  | -1.76014200 | -3.47643500 | -0.36267400 |
| C  | -1.07528300 | -3.20351600 | -1.81426600 |
| C  | 0.45764400  | -3.32013100 | -1.95582900 |
| C  | 1.22609900  | -2.43118600 | -3.05048700 |
| C  | 2.60616900  | -1.97295400 | -2.27265800 |
| C  | 3.17683100  | -0.53209900 | -2.39334000 |
| C  | 4.01031900  | 0.16617900  | -1.14877400 |
| C  | 3.45043800  | 1.65582000  | -1.11989400 |
| C  | 3.31106400  | 2.45501600  | 0.22088200  |
| C  | 1.95178900  | 3.37257500  | 0.33524100  |
| C  | 1.13870200  | 2.58792100  | 1.28741500  |
| C  | -0.22504200 | 2.67166000  | 1.44736700  |
| C  | -0.85699900 | 1.77272500  | 2.27561500  |
| C  | -2.32546200 | 1.87790500  | 2.22034800  |
| C  | -3.00946700 | 0.47474100  | 2.42709900  |
| C  | -3.54223300 | -0.24689400 | 1.11381800  |
| C  | -1.88679200 | -1.66579000 | 2.03838700  |
| C  | -2.07964600 | -0.66556600 | 3.13013900  |
| C  | -0.72082000 | -0.26329600 | 3.75728400  |
| C  | -0.14036700 | 0.83060400  | 2.95979500  |
| C  | 1.22116100  | 0.75569000  | 2.81182500  |
| C  | 1.85169200  | 1.61074100  | 1.93980400  |
| C  | 3.27969800  | 1.58655600  | 1.55716900  |
| C  | 3.83928800  | 0.12846000  | 1.60829800  |
| C  | 3.95057000  | -0.61696900 | 0.20425000  |
| C  | 2.79429300  | -1.53382400 | 0.22402500  |
| C  | 2.21566600  | -2.14729500 | -0.85890900 |
| C  | 1.06839100  | -2.87888300 | -0.69137300 |
| C  | 0.51637300  | -3.02003300 | 0.55455300  |
| C  | -0.79409700 | -3.62448200 | 0.87187900  |
| C  | -1.10303500 | -2.90989300 | 2.25132400  |
| C  | 0.30701500  | -2.58226300 | 2.87541800  |
| C  | 0.48016600  | -1.32849800 | 3.80459000  |
| C  | 1.82419500  | -0.41573000 | 3.48173800  |
| C  | 2.94952300  | -0.91665300 | 2.52762000  |
| C  | 2.27153100  | -1.71116100 | 1.48144300  |
| C  | 1.12054100  | -2.44114100 | 1.64599000  |
| C  | -2.51416100 | -1.38275700 | -1.36598600 |
| C  | -1.55335900 | -1.82735400 | -2.16584700 |

|   |             |             |             |
|---|-------------|-------------|-------------|
| C | -1.16254100 | -1.19274800 | -3.44840900 |
| C | 0.39590900  | -1.24941700 | -3.67240100 |
| C | 0.80769400  | 0.06147100  | -3.11201500 |
| C | 2.01238300  | 0.37406400  | -2.51942000 |
| C | 2.15013500  | 1.54712900  | -1.81756500 |
| C | 1.11139700  | 2.44719500  | -1.76336500 |
| C | 1.04646200  | 3.64504500  | -0.89484700 |
| C | -0.58815600 | 3.85143400  | -0.72778800 |
| C | -1.18503800 | 3.52505300  | 0.69650200  |
| C | -2.51019200 | 2.66456400  | 0.87234100  |
| C | -2.67177200 | 1.72633400  | -0.26418700 |
| C | -3.63733100 | 0.59355600  | -0.18903800 |
| C | -3.36713200 | -0.16968300 | -1.53720400 |
| C | -2.69198800 | 0.87471500  | -2.48144600 |
| C | -1.54581000 | 0.33694100  | -3.44622900 |
| C | -0.24635000 | 0.94507000  | -3.03732400 |
| C | -0.08046500 | 2.14055400  | -2.37037200 |
| C | -1.21052700 | 2.97284500  | -1.89127000 |
| C | -2.20264600 | 1.92653400  | -1.49034500 |
| F | -4.06100900 | -2.76906100 | -0.30378200 |
| F | -2.46345500 | -4.61982700 | -0.46077500 |
| F | -1.63196800 | -4.07124900 | -2.70240600 |
| F | 0.76301500  | -4.62476600 | -2.19402000 |
| F | 1.57773200  | -3.24737800 | -4.05814200 |
| F | 3.56755000  | -2.86693700 | -2.62139400 |
| F | 3.97326500  | -0.45548700 | -3.48952200 |
| F | 5.30487700  | 0.22999800  | -1.50929600 |
| F | 4.27464400  | 2.38946400  | -1.92562300 |
| F | 4.37117900  | 3.27995300  | 0.30204300  |
| F | 2.32262300  | 4.55967300  | 0.88178500  |
| F | -2.74662000 | 2.69113700  | 3.23120900  |
| F | -4.06954800 | 0.67587900  | 3.23234200  |
| F | -4.79613700 | -0.71095000 | 1.38104100  |
| F | -2.82140400 | -1.25648800 | 4.10702200  |
| F | -0.94826600 | 0.15695100  | 5.03213600  |
| F | 3.96800900  | 2.30009400  | 2.49794000  |
| F | 5.07469600  | 0.18894900  | 2.13525200  |
| F | 5.08044700  | -1.38281300 | 0.26219900  |
| F | -0.64678600 | -4.95419000 | 1.12389900  |
| F | -1.79872000 | -3.72537600 | 3.07904800  |
| F | 0.72082400  | -3.67687100 | 3.57202900  |
| F | 0.58382800  | -1.77094700 | 5.06860200  |
| F | 2.36269700  | -0.08082400 | 4.68133300  |
| F | 3.83387000  | -1.67294800 | 3.22532400  |

|    |             |             |             |
|----|-------------|-------------|-------------|
| F  | -1.79272400 | -1.84518400 | -4.45589000 |
| F  | 0.61005700  | -1.25077600 | -5.01745600 |
| F  | 1.51604700  | 4.73884500  | -1.55012100 |
| F  | -0.83022800 | 5.14768100  | -0.99538300 |
| F  | -1.37326900 | 4.70881000  | 1.34446700  |
| F  | -3.62509900 | 3.42566300  | 0.99808000  |
| F  | -4.89155000 | 1.12486900  | -0.23854700 |
| F  | -4.54784500 | -0.58486100 | -2.06268600 |
| F  | -3.65731800 | 1.43308500  | -3.25263000 |
| F  | -1.86456900 | 0.68208100  | -4.72042800 |
| F  | -1.69690700 | 3.75615600  | -2.89362300 |
| H  | -3.80682900 | 5.17675100  | -0.47590200 |
| O  | -3.54220200 | 4.69392800  | -1.26893400 |
| H  | -3.12291500 | 5.35609600  | -1.83252800 |
| IP |             |             |             |
| C  | 2.95939500  | -1.10043700 | -0.87934700 |
| C  | 3.35132700  | -1.41962800 | 0.52342300  |
| C  | 2.65059900  | -2.66675400 | 1.16755400  |
| C  | 2.01964100  | -2.07521200 | 2.55466400  |
| C  | 0.55978900  | -2.43348000 | 2.92286600  |
| C  | -0.32281800 | -1.40457500 | 3.77710600  |
| C  | -1.82886000 | -1.53683800 | 3.10225900  |
| C  | -2.72002400 | -0.29196200 | 2.82472700  |
| C  | -3.78749100 | -0.25017200 | 1.56260300  |
| C  | -3.60570000 | 1.22047000  | 0.97618200  |
| C  | -3.76556400 | 1.52776100  | -0.55010000 |
| C  | -2.68584000 | 2.62396600  | -1.14744200 |
| C  | -1.77138500 | 1.74376700  | -1.90576600 |
| C  | -0.47856200 | 2.04543100  | -2.25814900 |
| C  | 0.31292900  | 1.08247300  | -2.83689800 |
| C  | 1.70942100  | 1.52046000  | -3.03177200 |
| C  | 2.68239400  | 0.29328200  | -2.86367200 |
| C  | 3.36572500  | 0.22175600  | -1.45433900 |
| C  | 2.20106100  | -1.81587900 | -1.69706500 |
| C  | 2.03996700  | -1.19720800 | -3.05416400 |
| C  | 0.58320400  | -1.32394000 | -3.56420900 |
| C  | -0.18948300 | -0.16882400 | -3.07578400 |
| C  | -1.48101700 | -0.47346000 | -2.72678300 |
| C  | -2.25652200 | 0.47432300  | -2.10271600 |
| C  | -3.60699400 | 0.28243900  | -1.53237900 |
| C  | -3.78906100 | -1.18908900 | -1.03567100 |
| C  | -3.62568200 | -1.41800400 | 0.53430300  |
| C  | -2.28083700 | -2.01991700 | 0.64581600  |
| C  | -1.50024300 | -2.09518800 | 1.77409900  |

|   |             |             |             |
|---|-------------|-------------|-------------|
| C | -0.21683100 | -2.56922900 | 1.68010000  |
| C | 0.27416500  | -2.99896300 | 0.47661800  |
| C | 1.66337400  | -3.41063000 | 0.18981200  |
| C | 1.70759200  | -3.18147200 | -1.37981200 |
| C | 0.21549400  | -3.36250100 | -1.86340500 |
| C | -0.31748300 | -2.56753000 | -3.10634900 |
| C | -1.81996800 | -1.90148100 | -2.90210300 |
| C | -2.72526300 | -2.27086700 | -1.69046800 |
| C | -1.80685500 | -2.49190000 | -0.55350400 |
| C | -0.52232400 | -2.96859800 | -0.64251800 |
| C | 2.95784700  | -0.25311200 | 1.37713600  |
| C | 2.19884000  | -0.59417600 | 2.40785000  |
| C | 1.72506000  | 0.36842300  | 3.43620400  |
| C | 0.23081100  | 0.06160500  | 3.84644500  |
| C | -0.50160300 | 0.93941300  | 2.90450800  |
| C | -1.79047300 | 0.79567700  | 2.45130100  |
| C | -2.25647700 | 1.60312900  | 1.44275700  |
| C | -1.46294100 | 2.60719500  | 0.94100000  |
| C | -1.78111800 | 3.47623900  | -0.21205100 |
| C | -0.26841500 | 3.97190300  | -0.67029000 |
| C | 0.27034300  | 3.29086200  | -1.97788100 |
| C | 1.75761400  | 2.76546500  | -2.05008400 |
| C | 2.23189100  | 2.35561000  | -0.70248700 |
| C | 2.96803800  | 1.27782500  | -0.48199000 |
| C | 3.36801000  | 1.11625000  | 0.95204500  |
| C | 2.68743200  | 2.30399400  | 1.71377500  |
| C | 1.70141700  | 1.84352600  | 2.85371300  |
| C | 0.30721000  | 1.91326800  | 2.36913000  |
| C | -0.17603100 | 2.74682400  | 1.39545800  |
| C | 0.61468800  | 3.72781800  | 0.63892800  |
| C | 2.08023400  | 3.24138400  | 0.49924000  |
| F | 4.70742500  | -1.58078200 | 0.55679900  |
| F | 3.61146800  | -3.54539400 | 1.51183300  |
| F | 2.80829500  | -2.49738300 | 3.57901600  |
| F | 0.57122600  | -3.61938600 | 3.59256600  |
| F | -0.39515700 | -1.87254500 | 5.03392400  |
| F | -2.51556500 | -2.42998100 | 3.85910200  |
| F | -3.42410900 | 0.02283500  | 3.94087700  |
| F | -5.02866500 | -0.33297400 | 2.07231900  |
| F | -4.50939500 | 2.00872700  | 1.63145700  |
| F | -4.99957500 | 2.03083000  | -0.72953400 |
| F | -3.38101200 | 3.44338700  | -1.97651200 |
| F | 1.86547200  | 2.00076100  | -4.29685500 |
| F | 3.65501600  | 0.42816200  | -3.78449900 |



|   |             |             |             |
|---|-------------|-------------|-------------|
| F | 4.72443300  | 0.26978500  | -1.59332800 |
| F | 2.83312400  | -1.87611700 | -3.92613400 |
| F | 0.61138800  | -1.31876200 | -4.92599400 |
| F | -4.51138400 | 0.47101000  | -2.53854000 |
| F | -5.03112000 | -1.57722200 | -1.37414600 |
| F | -4.53766500 | -2.37478500 | 0.88065000  |
| F | 1.79636100  | -4.74853500 | 0.40669200  |
| F | 2.50031200  | -4.10083300 | -1.98148600 |
| F | 0.01866500  | -4.68898000 | -2.10168500 |
| F | -0.38839700 | -3.42535000 | -4.13773100 |
| F | -2.49719300 | -2.11292000 | -4.05854300 |
| F | -3.43419000 | -3.39111400 | -1.97862800 |
| F | 2.52842000  | 0.28997200  | 4.52440300  |
| F | 0.05119800  | 0.51330600  | 5.11934900  |
| F | -2.45197800 | 4.58931800  | 0.18036700  |
| F | -0.32110100 | 5.29620000  | -0.89312400 |
| F | 0.09041600  | 4.16705800  | -3.00525800 |
| F | 2.56367000  | 3.73171900  | -2.54670600 |
| F | 4.72764200  | 1.20026600  | 1.06784600  |
| F | 3.66088800  | 3.02490500  | 2.30969100  |
| F | 1.85966800  | 2.69522300  | 3.90737300  |
| F | 0.65161400  | 4.91354600  | 1.33573400  |
| O | 2.91151100  | 4.32384700  | 0.27279300  |
| H | 2.69425300  | 5.02463600  | 0.91145400  |

C<sub>1</sub>-S<sub>N</sub>2'-C60-F<sub>b</sub>

RC

|   |             |             |             |
|---|-------------|-------------|-------------|
| C | -2.66045000 | -1.45199100 | 0.98614300  |
| C | -2.78084900 | -2.29804000 | -0.22443100 |
| C | -1.76014200 | -3.47643500 | -0.36267400 |
| C | -1.07528300 | -3.20351600 | -1.81426600 |
| C | 0.45764400  | -3.32013100 | -1.95582900 |
| C | 1.22609900  | -2.43118600 | -3.05048700 |
| C | 2.60616900  | -1.97295400 | -2.27265800 |
| C | 3.17683100  | -0.53209900 | -2.39334000 |
| C | 4.01031900  | 0.16617900  | -1.14877400 |
| C | 3.45043800  | 1.65582000  | -1.11989400 |
| C | 3.31106400  | 2.45501600  | 0.22088200  |
| C | 1.95178900  | 3.37257500  | 0.33524100  |
| C | 1.13870200  | 2.58792100  | 1.28741500  |
| C | -0.22504200 | 2.67166000  | 1.44736700  |
| C | -0.85699900 | 1.77272500  | 2.27561500  |
| C | -2.32546200 | 1.87790500  | 2.22034800  |
| C | -3.00946700 | 0.47474100  | 2.42709900  |
| C | -3.54223300 | -0.24689400 | 1.11381800  |

|   |             |             |             |
|---|-------------|-------------|-------------|
| C | -1.88679200 | -1.66579000 | 2.03838700  |
| C | -2.07964600 | -0.66556600 | 3.13013900  |
| C | -0.72082000 | -0.26329600 | 3.75728400  |
| C | -0.14036700 | 0.83060400  | 2.95979500  |
| C | 1.22116100  | 0.75569000  | 2.81182500  |
| C | 1.85169200  | 1.61074100  | 1.93980400  |
| C | 3.27969800  | 1.58655600  | 1.55716900  |
| C | 3.83928800  | 0.12846000  | 1.60829800  |
| C | 3.95057000  | -0.61696900 | 0.20425000  |
| C | 2.79429300  | -1.53382400 | 0.22402500  |
| C | 2.21566600  | -2.14729500 | -0.85890900 |
| C | 1.06839100  | -2.87888300 | -0.69137300 |
| C | 0.51637300  | -3.02003300 | 0.55455300  |
| C | -0.79409700 | -3.62448200 | 0.87187900  |
| C | -1.10303500 | -2.90989300 | 2.25132400  |
| C | 0.30701500  | -2.58226300 | 2.87541800  |
| C | 0.48016600  | -1.32849800 | 3.80459000  |
| C | 1.82419500  | -0.41573000 | 3.48173800  |
| C | 2.94952300  | -0.91665300 | 2.52762000  |
| C | 2.27153100  | -1.71116100 | 1.48144300  |
| C | 1.12054100  | -2.44114100 | 1.64599000  |
| C | -2.51416100 | -1.38275700 | -1.36598600 |
| C | -1.55335900 | -1.82735400 | -2.16584700 |
| C | -1.16254100 | -1.19274800 | -3.44840900 |
| C | 0.39590900  | -1.24941700 | -3.67240100 |
| C | 0.80769400  | 0.06147100  | -3.11201500 |
| C | 2.01238300  | 0.37406400  | -2.51942000 |
| C | 2.15013500  | 1.54712900  | -1.81756500 |
| C | 1.11139700  | 2.44719500  | -1.76336500 |
| C | 1.04646200  | 3.64504500  | -0.89484700 |
| C | -0.58815600 | 3.85143400  | -0.72778800 |
| C | -1.18503800 | 3.52505300  | 0.69650200  |
| C | -2.51019200 | 2.66456400  | 0.87234100  |
| C | -2.67177200 | 1.72633400  | -0.26418700 |
| C | -3.63733100 | 0.59355600  | -0.18903800 |
| C | -3.36713200 | -0.16968300 | -1.53720400 |
| C | -2.69198800 | 0.87471500  | -2.48144600 |
| C | -1.54581000 | 0.33694100  | -3.44622900 |
| C | -0.24635000 | 0.94507000  | -3.03732400 |
| C | -0.08046500 | 2.14055400  | -2.37037200 |
| C | -1.21052700 | 2.97284500  | -1.89127000 |
| C | -2.20264600 | 1.92653400  | -1.49034500 |
| F | -4.06100900 | -2.76906100 | -0.30378200 |
| F | -2.46345500 | -4.61982700 | -0.46077500 |

|    |                                 |             |                          |
|----|---------------------------------|-------------|--------------------------|
| F  | -1.63196800                     | -4.07124900 | -2.70240600              |
| F  | 0.76301500                      | -4.62476600 | -2.19402000              |
| F  | 1.57773200                      | -3.24737800 | -4.05814200              |
| F  | 3.56755000                      | -2.86693700 | -2.62139400              |
| F  | 3.97326500                      | -0.45548700 | -3.48952200              |
| F  | 5.30487700                      | 0.22999800  | -1.50929600              |
| F  | 4.27464400                      | 2.38946400  | -1.92562300              |
| F  | 4.37117900                      | 3.27995300  | 0.30204300               |
| F  | 2.32262300                      | 4.55967300  | 0.88178500               |
| F  | -2.74662000                     | 2.69113700  | 3.23120900               |
| F  | -4.06954800                     | 0.67587900  | 3.23234200               |
| F  | -4.79613700                     | -0.71095000 | 1.38104100               |
| F  | -2.82140400                     | -1.25648800 | 4.10702200               |
| F  | -0.94826600                     | 0.15695100  | 5.03213600               |
| F  | 3.96800900                      | 2.30009400  | 2.49794000               |
| F  | 5.07469600                      | 0.18894900  | 2.13525200               |
| F  | 5.08044700                      | -1.38281300 | 0.26219900               |
| F  | -0.64678600                     | -4.95419000 | 1.12389900               |
| F  | -1.79872000                     | -3.72537600 | 3.07904800               |
| F  | 0.72082400                      | -3.67687100 | 3.57202900               |
| F  | 0.58382800                      | -1.77094700 | 5.06860200               |
| F  | 2.36269700                      | -0.08082400 | 4.68133300               |
| F  | 3.83387000                      | -1.67294800 | 3.22532400               |
| F  | -1.79272400                     | -1.84518400 | -4.45589000              |
| F  | 0.61005700                      | -1.25077600 | -5.01745600              |
| F  | 1.51604700                      | 4.73884500  | -1.55012100              |
| F  | -0.83022800                     | 5.14768100  | -0.99538300              |
| F  | -1.37326900                     | 4.70881000  | 1.34446700               |
| F  | -3.62509900                     | 3.42566300  | 0.99808000               |
| F  | -4.89155000                     | 1.12486900  | -0.23854700              |
| F  | -4.54784500                     | -0.58486100 | -2.06268600              |
| F  | -3.65731800                     | 1.43308500  | -3.25263000              |
| F  | -1.86456900                     | 0.68208100  | -4.72042800              |
| F  | -1.69690700                     | 3.75615600  | -2.89362300              |
| H  | -3.80682900                     | 5.17675100  | -0.47590200              |
| O  | -3.54220200                     | 4.69392800  | -1.26893400              |
| H  | -3.12291500                     | 5.35609600  | -1.83252800              |
| TS | imaginary vibrational frequency |             | -828.07 cm <sup>-1</sup> |
| C  | -2.66045000                     | -1.45199100 | 0.98614300               |
| C  | -2.78084900                     | -2.29804000 | -0.22443100              |
| C  | -1.76014200                     | -3.47643500 | -0.36267400              |
| C  | -1.07528300                     | -3.20351600 | -1.81426600              |
| C  | 0.45764400                      | -3.32013100 | -1.95582900              |
| C  | 1.22609900                      | -2.43118600 | -3.05048700              |

|   |             |             |             |
|---|-------------|-------------|-------------|
| C | 2.60616900  | -1.97295400 | -2.27265800 |
| C | 3.17683100  | -0.53209900 | -2.39334000 |
| C | 4.01031900  | 0.16617900  | -1.14877400 |
| C | 3.45043800  | 1.65582000  | -1.11989400 |
| C | 3.31106400  | 2.45501600  | 0.22088200  |
| C | 1.95178900  | 3.37257500  | 0.33524100  |
| C | 1.13870200  | 2.58792100  | 1.28741500  |
| C | -0.22504200 | 2.67166000  | 1.44736700  |
| C | -0.85699900 | 1.77272500  | 2.27561500  |
| C | -2.32546200 | 1.87790500  | 2.22034800  |
| C | -3.00946700 | 0.47474100  | 2.42709900  |
| C | -3.54223300 | -0.24689400 | 1.11381800  |
| C | -1.88679200 | -1.66579000 | 2.03838700  |
| C | -2.07964600 | -0.66556600 | 3.13013900  |
| C | -0.72082000 | -0.26329600 | 3.75728400  |
| C | -0.14036700 | 0.83060400  | 2.95979500  |
| C | 1.22116100  | 0.75569000  | 2.81182500  |
| C | 1.85169200  | 1.61074100  | 1.93980400  |
| C | 3.27969800  | 1.58655600  | 1.55716900  |
| C | 3.83928800  | 0.12846000  | 1.60829800  |
| C | 3.95057000  | -0.61696900 | 0.20425000  |
| C | 2.79429300  | -1.53382400 | 0.22402500  |
| C | 2.21566600  | -2.14729500 | -0.85890900 |
| C | 1.06839100  | -2.87888300 | -0.69137300 |
| C | 0.51637300  | -3.02003300 | 0.55455300  |
| C | -0.79409700 | -3.62448200 | 0.87187900  |
| C | -1.10303500 | -2.90989300 | 2.25132400  |
| C | 0.30701500  | -2.58226300 | 2.87541800  |
| C | 0.48016600  | -1.32849800 | 3.80459000  |
| C | 1.82419500  | -0.41573000 | 3.48173800  |
| C | 2.94952300  | -0.91665300 | 2.52762000  |
| C | 2.27153100  | -1.71116100 | 1.48144300  |
| C | 1.12054100  | -2.44114100 | 1.64599000  |
| C | -2.51416100 | -1.38275700 | -1.36598600 |
| C | -1.55335900 | -1.82735400 | -2.16584700 |
| C | -1.16254100 | -1.19274800 | -3.44840900 |
| C | 0.39590900  | -1.24941700 | -3.67240100 |
| C | 0.80769400  | 0.06147100  | -3.11201500 |
| C | 2.01238300  | 0.37406400  | -2.51942000 |
| C | 2.15013500  | 1.54712900  | -1.81756500 |
| C | 1.11139700  | 2.44719500  | -1.76336500 |
| C | 1.04646200  | 3.64504500  | -0.89484700 |
| C | -0.58815600 | 3.85143400  | -0.72778800 |
| C | -1.18503800 | 3.52505300  | 0.69650200  |

|   |             |             |             |
|---|-------------|-------------|-------------|
| C | -2.51019200 | 2.66456400  | 0.87234100  |
| C | -2.67177200 | 1.72633400  | -0.26418700 |
| C | -3.63733100 | 0.59355600  | -0.18903800 |
| C | -3.36713200 | -0.16968300 | -1.53720400 |
| C | -2.69198800 | 0.87471500  | -2.48144600 |
| C | -1.54581000 | 0.33694100  | -3.44622900 |
| C | -0.24635000 | 0.94507000  | -3.03732400 |
| C | -0.08046500 | 2.14055400  | -2.37037200 |
| C | -1.21052700 | 2.97284500  | -1.89127000 |
| C | -2.20264600 | 1.92653400  | -1.49034500 |
| F | -4.06100900 | -2.76906100 | -0.30378200 |
| F | -2.46345500 | -4.61982700 | -0.46077500 |
| F | -1.63196800 | -4.07124900 | -2.70240600 |
| F | 0.76301500  | -4.62476600 | -2.19402000 |
| F | 1.57773200  | -3.24737800 | -4.05814200 |
| F | 3.56755000  | -2.86693700 | -2.62139400 |
| F | 3.97326500  | -0.45548700 | -3.48952200 |
| F | 5.30487700  | 0.22999800  | -1.50929600 |
| F | 4.27464400  | 2.38946400  | -1.92562300 |
| F | 4.37117900  | 3.27995300  | 0.30204300  |
| F | 2.32262300  | 4.55967300  | 0.88178500  |
| F | -2.74662000 | 2.69113700  | 3.23120900  |
| F | -4.06954800 | 0.67587900  | 3.23234200  |
| F | -4.79613700 | -0.71095000 | 1.38104100  |
| F | -2.82140400 | -1.25648800 | 4.10702200  |
| F | -0.94826600 | 0.15695100  | 5.03213600  |
| F | 3.96800900  | 2.30009400  | 2.49794000  |
| F | 5.07469600  | 0.18894900  | 2.13525200  |
| F | 5.08044700  | -1.38281300 | 0.26219900  |
| F | -0.64678600 | -4.95419000 | 1.12389900  |
| F | -1.79872000 | -3.72537600 | 3.07904800  |
| F | 0.72082400  | -3.67687100 | 3.57202900  |
| F | 0.58382800  | -1.77094700 | 5.06860200  |
| F | 2.36269700  | -0.08082400 | 4.68133300  |
| F | 3.83387000  | -1.67294800 | 3.22532400  |
| F | -1.79272400 | -1.84518400 | -4.45589000 |
| F | 0.61005700  | -1.25077600 | -5.01745600 |
| F | 1.51604700  | 4.73884500  | -1.55012100 |
| F | -0.83022800 | 5.14768100  | -0.99538300 |
| F | -1.37326900 | 4.70881000  | 1.34446700  |
| F | -3.62509900 | 3.42566300  | 0.99808000  |
| F | -4.89155000 | 1.12486900  | -0.23854700 |
| F | -4.54784500 | -0.58486100 | -2.06268600 |
| F | -3.65731800 | 1.43308500  | -3.25263000 |

|    |             |             |             |
|----|-------------|-------------|-------------|
| F  | -1.86456900 | 0.68208100  | -4.72042800 |
| F  | -1.69690700 | 3.75615600  | -2.89362300 |
| H  | -3.80682900 | 5.17675100  | -0.47590200 |
| O  | -3.54220200 | 4.69392800  | -1.26893400 |
| H  | -3.12291500 | 5.35609600  | -1.83252800 |
| IP |             |             |             |
| C  | 2.77350900  | 1.50011300  | -0.34820100 |
| C  | 3.25868100  | 0.57885200  | -1.39919100 |
| C  | 2.56842500  | 0.68963700  | -2.80032800 |
| C  | 2.04586000  | -0.82647300 | -3.07368600 |
| C  | 0.60847400  | -1.03800400 | -3.60843200 |
| C  | -0.18450100 | -2.37878400 | -3.23437700 |
| C  | -1.73624900 | -1.85106000 | -2.97719000 |
| C  | -2.59411200 | -2.36804100 | -1.78593700 |
| C  | -3.73118100 | -1.41542100 | -1.04920800 |
| C  | -3.51859800 | -1.71932800 | 0.49962000  |
| C  | -3.76317400 | -0.63434700 | 1.60253300  |
| C  | -2.69116000 | -0.66476800 | 2.86011200  |
| C  | -1.89630700 | 0.56088800  | 2.61033000  |
| C  | -0.63981500 | 0.81296600  | 3.10310100  |
| C  | 0.08286000  | 1.89791400  | 2.62261700  |
| C  | 1.53350600  | 1.76794100  | 2.94306300  |
| C  | 2.47061100  | 2.41502700  | 1.86995900  |
| C  | 3.33507900  | 1.37298600  | 1.03444500  |
| C  | 1.93220800  | 2.50986200  | -0.50064100 |
| C  | 1.74878400  | 3.31921300  | 0.73713800  |
| C  | 0.27172100  | 3.75951100  | 0.92677900  |
| C  | -0.46122700 | 2.71737200  | 1.67258000  |
| C  | -1.73078200 | 2.47639400  | 1.19455700  |
| C  | -2.42964300 | 1.37921600  | 1.63647900  |
| C  | -3.72479500 | 0.88175000  | 1.11708700  |
| C  | -3.92038200 | 1.26169600  | -0.38965700 |
| C  | -3.67734600 | 0.09279600  | -1.45131100 |
| C  | -2.35395600 | 0.42535400  | -2.01818300 |
| C  | -1.51380700 | -0.41282300 | -2.71332500 |
| C  | -0.25654600 | 0.01851300  | -3.05542100 |
| C  | 0.14389800  | 1.29014800  | -2.74164500 |
| C  | 1.50386900  | 1.84725200  | -2.89545400 |
| C  | 1.45083600  | 3.00074200  | -1.81645300 |
| C  | -0.06229800 | 3.42018900  | -1.72290800 |
| C  | -0.64281000 | 3.98119700  | -0.37561700 |
| C  | -2.10805800 | 3.34669400  | 0.05965000  |
| C  | -2.93932200 | 2.46969600  | -0.92134000 |
| C  | -1.96698200 | 1.71245600  | -1.73547300 |

|   |             |             |             |
|---|-------------|-------------|-------------|
| C | -0.71369300 | 2.14257000  | -2.08745000 |
| C | 2.95364800  | -0.78489100 | -0.88660500 |
| C | 2.25564900  | -1.50579800 | -1.75372400 |
| C | 1.90333800  | -2.93214700 | -1.56043700 |
| C | 0.42870600  | -3.21192500 | -2.05309300 |
| C | -0.32452900 | -2.95894600 | -0.80496300 |
| C | -1.64069200 | -2.58597900 | -0.67740900 |
| C | -2.12718700 | -2.21019000 | 0.55000100  |
| C | -1.32526500 | -2.28248300 | 1.65917200  |
| C | -1.68214900 | -1.84062600 | 3.02015100  |
| C | -0.19676900 | -1.63438300 | 3.68076000  |
| C | 0.26500000  | -0.14984800 | 3.80844700  |
| C | 1.54060000  | 0.25631300  | 3.08388300  |
| C | 2.28189300  | -0.55711200 | 2.35394700  |
| C | 3.43510700  | -0.10273400 | 1.53212800  |
| C | 3.53723100  | -1.21190300 | 0.42399200  |
| C | 2.85915500  | -2.52023100 | 0.99959400  |
| C | 1.90690900  | -3.27160200 | -0.01877700 |
| C | 0.49189000  | -2.98524900 | 0.30153500  |
| C | -0.01230200 | -2.65753100 | 1.52925000  |
| C | 0.76750600  | -2.52841900 | 2.76681300  |
| C | 2.20898700  | -2.05064400 | 2.43167800  |
| F | 4.60936400  | 0.73361000  | -1.53261800 |
| F | 3.52610700  | 0.95364100  | -3.70903900 |
| F | 2.89630500  | -1.40214100 | -3.96659200 |
| F | 0.64900000  | -0.94450400 | -4.96621900 |
| F | -0.19743300 | -3.16464500 | -4.32355700 |
| F | -2.40512800 | -2.04455900 | -4.14135600 |
| F | -3.21993600 | -3.51887900 | -2.13856300 |
| F | -4.94322300 | -1.88290900 | -1.39444700 |
| F | -4.33577700 | -2.77183700 | 0.80143400  |
| F | -4.98869700 | -0.86108100 | 2.11065900  |
| F | -3.41926600 | -0.54803000 | 3.99920600  |
| F | 1.80498700  | 2.33464800  | 4.15581800  |
| F | 3.32658800  | 3.21907800  | 2.52901400  |
| F | 4.61027100  | 1.85239000  | 0.97818900  |
| F | 2.48516000  | 4.45605300  | 0.58848200  |
| F | 0.26928100  | 4.92127300  | 1.63549800  |
| F | -4.70909300 | 1.52660600  | 1.81183800  |
| F | -5.19271200 | 1.67372500  | -0.53245800 |
| F | -4.60612500 | 0.26926800  | -2.43685300 |
| F | 1.63259300  | 2.43343100  | -4.11699000 |
| F | 2.20610300  | 4.06135500  | -2.18981000 |
| F | -0.30011900 | 4.34269400  | -2.69611100 |

|   |             |             |             |
|---|-------------|-------------|-------------|
| F | -0.80644800 | 5.30593500  | -0.53201800 |
| F | -2.87028400 | 4.38880100  | 0.48059100  |
| F | -3.69966300 | 3.27756000  | -1.70429100 |
| F | 2.78013700  | -3.70410000 | -2.24595600 |
| F | 0.34643600  | -4.53034700 | -2.38352900 |
| F | -2.28382400 | -2.84472300 | 3.71141000  |
| F | -0.21726000 | -2.16893400 | 4.91353300  |
| F | 0.35923200  | 0.16390100  | 5.13388400  |
| F | 4.55488500  | -0.20882300 | 2.30349000  |
| F | 4.85080000  | -1.46162000 | 0.17570300  |
| F | 3.85664600  | -3.38570700 | 1.29539400  |
| F | 2.13659300  | -4.60998600 | 0.10845900  |
| F | 0.88416600  | -3.75727800 | 3.36544000  |
| O | 3.07509600  | -2.40516700 | 3.45543700  |
| H | 3.10241000  | -3.37489000 | 3.51797900  |

C<sub>1</sub>-S<sub>N</sub>2'-C52-F<sub>c</sub>

RC

|   |             |             |             |
|---|-------------|-------------|-------------|
| C | 2.60262400  | -1.63839900 | -0.79173800 |
| C | 2.77926900  | -2.21344300 | 0.56142600  |
| C | 1.76720900  | -3.32708400 | 0.99163000  |
| C | 1.15087500  | -2.74869900 | 2.38264800  |
| C | -0.37397000 | -2.81828300 | 2.61457000  |
| C | -1.09049100 | -1.71616800 | 3.53456400  |
| C | -2.50810900 | -1.41828400 | 2.74417200  |
| C | -3.07138600 | 0.02174900  | 2.58388900  |
| C | -3.96461400 | 0.45227700  | 1.26222500  |
| C | -3.40493300 | 1.89685700  | 0.89414100  |
| C | -3.33017700 | 2.39465500  | -0.58907400 |
| C | -1.97577000 | 3.25290400  | -0.95376100 |
| C | -1.21026500 | 2.26713300  | -1.74405700 |
| C | 0.14315600  | 2.29471800  | -1.97170900 |
| C | 0.74321100  | 1.24685400  | -2.62806500 |
| C | 2.21296400  | 1.36313500  | -2.67564900 |
| C | 2.88792800  | -0.05917700 | -2.61596600 |
| C | 3.47777200  | -0.49591600 | -1.20721100 |
| C | 1.78587000  | -2.06545000 | -1.74136700 |
| C | 1.92531300  | -1.31683200 | -3.02582700 |
| C | 0.53583200  | -1.04463900 | -3.65784100 |
| C | -0.00525600 | 0.19180600  | -3.07155000 |
| C | -1.35875100 | 0.16343900  | -2.84949700 |
| C | -1.95301500 | 1.18551800  | -2.14921400 |
| C | -3.36214200 | 1.26378300  | -1.71305800 |
| C | -3.92573900 | -0.16504700 | -1.43218500 |
| C | -3.97162400 | -0.59835200 | 0.10026500  |



|   |             |             |             |
|---|-------------|-------------|-------------|
| C | -2.81772400 | -1.51063600 | 0.22078100  |
| C | -2.18678100 | -1.88837600 | 1.38083000  |
| C | -1.04410600 | -2.64368900 | 1.31554800  |
| C | -0.54949200 | -3.04521200 | 0.10307000  |
| C | 0.74295000  | -3.72045200 | -0.13773300 |
| C | 0.98896600  | -3.31710000 | -1.64873100 |
| C | -0.44879400 | -3.11359800 | -2.26261200 |
| C | -0.66621100 | -2.08508500 | -3.42718600 |
| C | -1.99475700 | -1.11180100 | -3.23845300 |
| C | -3.07839500 | -1.38953100 | -2.15284500 |
| C | -2.35309600 | -1.95298800 | -0.99414800 |
| C | -1.20641400 | -2.70643100 | -1.05601200 |
| C | 2.56581100  | -1.07710100 | 1.49572500  |
| C | 1.64636100  | -1.33459000 | 2.41598800  |
| C | 1.31454200  | -0.44541800 | 3.55558600  |
| C | -0.23235000 | -0.43956200 | 3.85461900  |
| C | -0.66932000 | 0.72392700  | 3.04526100  |
| C | -1.90083200 | 0.91971200  | 2.45859700  |
| C | -2.07107300 | 1.92181300  | 1.53409500  |
| C | -1.03635700 | 2.78274700  | 1.24674800  |
| C | -1.01006000 | 3.77615500  | 0.14648600  |
| C | 0.61760800  | 3.92058100  | -0.13341100 |
| C | 1.12634200  | 3.28760000  | -1.47865600 |
| C | 2.44675700  | 2.41769200  | -1.53030500 |
| C | 2.65797400  | 1.72145700  | -0.23615500 |
| C | 3.62687500  | 0.59699200  | -0.11434900 |
| C | 3.42502200  | 0.13505300  | 1.37301100  |
| C | 2.79645900  | 1.35924100  | 2.10842300  |
| C | 1.69548400  | 1.04574700  | 3.21462900  |
| C | 0.37857100  | 1.56394300  | 2.74284700  |
| C | 0.18190900  | 2.59545400  | 1.84942500  |
| C | 1.28771500  | 3.30045700  | 1.16045000  |
| C | 2.26243000  | 2.18623500  | 0.94386800  |
| F | 4.06189700  | -2.67211500 | 0.67616300  |
| F | 2.47519300  | -4.43060400 | 1.29627700  |
| F | 1.74990200  | -3.41211200 | 3.40882500  |
| F | -0.66800700 | -4.04298800 | 3.13106800  |
| F | -1.39323100 | -2.29996600 | 4.70662500  |
| F | -3.44863500 | -2.20920400 | 3.32174600  |
| F | -3.81084600 | 0.33864100  | 3.67739500  |
| F | -5.23955700 | 0.60624000  | 1.66293000  |
| F | -4.18743000 | 2.79445300  | 1.56423700  |
| F | -4.39262100 | 3.19482700  | -0.79230500 |
| F | -2.37051600 | 4.29459100  | -1.73043800 |

|    |                                 |             |                          |
|----|---------------------------------|-------------|--------------------------|
| F  | 2.57950200                      | 1.93970000  | -3.85532500              |
| F  | 3.91015800                      | -0.04197800 | -3.49145300              |
| F  | 4.72095600                      | -1.01416500 | -1.42253100              |
| F  | 2.62238800                      | -2.09983200 | -3.89297800              |
| F  | 0.70213400                      | -0.89808600 | -5.00096800              |
| F  | -4.08816400                     | 1.77265700  | -2.75237600              |
| F  | -5.18421500                     | -0.20379800 | -1.90272700              |
| F  | -5.10525100                     | -1.34554800 | 0.25340300               |
| F  | 0.57527600                      | -5.07110600 | -0.09570000              |
| F  | 1.64134600                      | -4.29678800 | -2.31896100              |
| F  | -0.88922400                     | -4.32901100 | -2.69037700              |
| F  | -0.82948900                     | -2.78202600 | -4.56297900              |
| F  | -2.58571700                     | -1.02357200 | -4.45652500              |
| F  | -3.99396500                     | -2.26559700 | -2.63738800              |
| F  | 1.99005600                      | -0.88357800 | 4.64689300               |
| F  | -0.38663700                     | -0.15339000 | 5.17715900               |
| F  | -1.44302500                     | 4.98810000  | 0.57712800               |
| F  | 0.91240400                      | 5.23047800  | -0.15810300              |
| F  | 1.25230700                      | 4.29391000  | -2.38672600              |
| F  | 3.52501100                      | 3.17568700  | -1.84115600              |
| F  | 4.88644600                      | 1.11977100  | -0.22333800              |
| F  | 4.62990800                      | -0.17370800 | 1.91875900               |
| F  | 3.80003700                      | 2.05595100  | 2.70602600               |
| F  | 2.07333700                      | 1.65075800  | 4.37046200               |
| F  | 1.81335200                      | 4.27910900  | 1.94628700               |
| H  | 4.37895300                      | 4.35733400  | 1.57168500               |
| O  | 4.18615200                      | 4.24906400  | 0.63178000               |
| H  | 4.97534300                      | 3.82509800  | 0.26988700               |
| TS | imaginary vibrational frequency |             | -886.93 cm <sup>-1</sup> |
| C  | 2.72686600                      | 0.45324200  | 1.49872900               |
| C  | 2.85934400                      | 1.86884100  | 1.08374400               |
| C  | 1.89190100                      | 2.90108100  | 1.75244400               |
| C  | 1.15566600                      | 3.59312700  | 0.47744800               |
| C  | -0.37321600                     | 3.80630100  | 0.50915200               |
| C  | -1.22109200                     | 3.79746400  | -0.86092100              |
| C  | -2.58537800                     | 2.97859900  | -0.46891900              |
| C  | -3.22895200                     | 1.94229400  | -1.43299000              |
| C  | -4.05107200                     | 0.64249200  | -0.84625300              |
| C  | -3.57243900                     | -0.55303000 | -1.78575100              |
| C  | -3.42255700                     | -2.00442700 | -1.21237800              |
| C  | -2.10057100                     | -2.79923300 | -1.74515200              |
| C  | -1.22654700                     | -2.75469500 | -0.55722200              |
| C  | 0.13387200                      | -2.93494200 | -0.54292600              |
| C  | 0.83072700                      | -2.74744900 | 0.61760100               |

|   |             |             |             |
|---|-------------|-------------|-------------|
| C | 2.28438200  | -2.88810600 | 0.45195000  |
| C | 3.04520700  | -1.94678200 | 1.43267600  |
| C | 3.56889500  | -0.59156000 | 0.81642600  |
| C | 2.02041000  | -0.00721400 | 2.52037700  |
| C | 2.19379300  | -1.47286600 | 2.74819500  |
| C | 0.82524200  | -2.13548500 | 3.05577700  |
| C | 0.17446900  | -2.45103700 | 1.77703100  |
| C | -1.18684700 | -2.29222900 | 1.77645400  |
| C | -1.87993300 | -2.40001700 | 0.59447000  |
| C | -3.31853200 | -2.14534200 | 0.37669000  |
| C | -3.81649800 | -1.03115900 | 1.34380200  |
| C | -3.91994400 | 0.41905200  | 0.70136300  |
| C | -2.72173500 | 1.09628700  | 1.22935200  |
| C | -2.14407700 | 2.23234800  | 0.72532200  |
| C | -0.96521300 | 2.68659700  | 1.25683000  |
| C | -0.37669000 | 2.01961500  | 2.29916300  |
| C | 0.96792900  | 2.27520500  | 2.85722700  |
| C | 1.28922900  | 0.86009000  | 3.48742600  |
| C | -0.12047700 | 0.24323900  | 3.84577800  |
| C | -0.32465200 | -1.31071400 | 3.81560800  |
| C | -1.72234200 | -1.80072500 | 3.06178000  |
| C | -2.85608600 | -0.79990400 | 2.67626000  |
| C | -2.16780700 | 0.45657700  | 2.31107400  |
| C | -0.97871500 | 0.90501000  | 2.83455700  |
| C | 2.52236700  | 1.85731800  | -0.35620400 |
| C | 1.54859200  | 2.70834500  | -0.66316000 |
| C | 1.08134500  | 3.01810600  | -2.03678300 |
| C | -0.46720000 | 3.24804900  | -2.12384500 |
| C | -0.93879700 | 1.89770000  | -2.53763600 |
| C | -2.13256200 | 1.29540800  | -2.18966200 |
| C | -2.30549900 | -0.05439000 | -2.38280100 |
| C | -1.31612400 | -0.80719600 | -2.99176000 |
| C | -1.25182700 | -2.29522100 | -2.94286700 |
| C | 0.37874400  | -2.56956700 | -2.94618300 |
| C | 1.00786500  | -3.23302000 | -1.69038700 |
| C | 2.44824300  | -2.78861700 | -1.12018100 |
| C | 2.90916100  | -1.42133600 | -1.65714300 |
| C | 3.73184800  | -0.44451000 | -0.75887400 |
| C | 3.30877900  | 1.00855000  | -1.29716700 |
| C | 2.45090800  | 0.74991400  | -2.53648100 |
| C | 1.39593200  | 1.82725600  | -3.00329400 |
| C | 0.06476400  | 1.15590700  | -3.11681300 |
| C | -0.12002300 | -0.20271000 | -3.34127300 |
| C | 0.97650900  | -1.15502000 | -3.12131700 |

|    |             |             |             |
|----|-------------|-------------|-------------|
| C  | 1.85063500  | -0.58657500 | -2.18140200 |
| F  | 4.15959100  | 2.25628500  | 1.25715700  |
| F  | 2.64603500  | 3.84662200  | 2.34516000  |
| F  | 1.73452900  | 4.80946500  | 0.28061000  |
| F  | -0.62838000 | 4.98227500  | 1.14558300  |
| F  | -1.57027200 | 5.06919900  | -1.12370200 |
| F  | -3.52038900 | 3.90701700  | -0.13349900 |
| F  | -4.07361700 | 2.59171500  | -2.27639100 |
| F  | -5.35926900 | 0.84135900  | -1.09539000 |
| F  | -4.48534000 | -0.63183400 | -2.79965000 |
| F  | -4.50846300 | -2.69800000 | -1.60144900 |
| F  | -2.48183000 | -4.07953100 | -2.00116800 |
| F  | 2.61393400  | -4.16880500 | 0.79910700  |
| F  | 4.11974400  | -2.63213200 | 1.87077800  |
| F  | 4.82316400  | -0.40043400 | 1.32527800  |
| F  | 2.99656500  | -1.65892500 | 3.82946900  |
| F  | 1.05318400  | -3.27531800 | 3.76434500  |
| F  | -3.99525600 | -3.28492400 | 0.70940500  |
| F  | -5.04153100 | -1.37841700 | 1.77461700  |
| F  | -5.00778700 | 1.01740400  | 1.27337200  |
| F  | 0.88353800  | 3.16709100  | 3.88302400  |
| F  | 2.02980100  | 0.99484900  | 4.61448500  |
| F  | -0.45789400 | 0.68223600  | 5.09038100  |
| F  | -0.37066500 | -1.74602500 | 5.08489000  |
| F  | -2.23479800 | -2.80684700 | 3.81325800  |
| F  | -3.68990100 | -0.62527400 | 3.73149900  |
| F  | 1.72612700  | 4.14554300  | -2.43868900 |
| F  | -0.68550800 | 4.11936000  | -3.14993100 |
| F  | -1.75106000 | -2.83653800 | -4.08259900 |
| F  | 0.62625400  | -3.36662000 | -4.00196600 |
| F  | 1.06198300  | -4.57815000 | -1.89619500 |
| F  | 3.37181700  | -3.72964100 | -1.48205900 |
| F  | 5.04580600  | -0.62640500 | -1.02184500 |
| F  | 4.44337500  | 1.69990000  | -1.58720300 |
| F  | 3.34334500  | 0.65188300  | -3.58915800 |
| F  | 1.78182800  | 2.36023400  | -4.19114000 |
| F  | 2.02578600  | -1.45022300 | -4.48309000 |
| H  | 4.20900500  | -2.63315300 | -2.79396300 |
| O  | 3.76652300  | -1.76450200 | -2.88634100 |
| H  | 3.05748700  | -1.67998300 | -3.77271900 |
| IP |             |             |             |
| C  | 2.85429800  | 0.03869300  | 1.26337100  |
| C  | 2.98584700  | 1.51058700  | 1.20860400  |
| C  | 2.10129000  | 2.34063000  | 2.19733400  |

|   |             |             |             |
|---|-------------|-------------|-------------|
| C | 1.28545500  | 3.33922800  | 1.20688700  |
| C | -0.23035500 | 3.54252900  | 1.42105900  |
| C | -1.17953400 | 3.89468100  | 0.17092100  |
| C | -2.53474400 | 3.00350500  | 0.45014000  |
| C | -3.28318600 | 2.25332500  | -0.68940600 |
| C | -4.08490600 | 0.84243500  | -0.38931100 |
| C | -3.71176000 | -0.07398400 | -1.64073000 |
| C | -3.53505500 | -1.62702900 | -1.47636400 |
| C | -2.27427400 | -2.26696100 | -2.30375700 |
| C | -1.30428000 | -2.52318400 | -1.22020200 |
| C | 0.05341400  | -2.69354500 | -1.36373300 |
| C | 0.84074200  | -2.79124100 | -0.25143700 |
| C | 2.27336200  | -2.91563000 | -0.55880900 |
| C | 3.12319800  | -2.26601800 | 0.57179900  |
| C | 3.62982900  | -0.79905400 | 0.28800300  |
| C | 2.21038000  | -0.66414800 | 2.18069600  |
| C | 2.37988800  | -2.13758400 | 2.02522200  |
| C | 1.02711200  | -2.85331200 | 2.25752500  |
| C | 0.27885400  | -2.81003300 | 0.99436100  |
| C | -1.07381400 | -2.66050300 | 1.14431600  |
| C | -1.85744100 | -2.46426200 | 0.03249900  |
| C | -3.30457200 | -2.16933900 | 0.00716100  |
| C | -3.70687700 | -1.34314600 | 1.26568500  |
| C | -3.83666300 | 0.22553900  | 1.03283000  |
| C | -2.58674300 | 0.74774300  | 1.61877700  |
| C | -2.02044600 | 1.97297000  | 1.37435800  |
| C | -0.79108500 | 2.26975000  | 1.90303900  |
| C | -0.13793900 | 1.35560900  | 2.68727800  |
| C | 1.25256200  | 1.45462700  | 3.17968500  |
| C | 1.58480000  | -0.07710700 | 3.39514900  |
| C | 0.19629500  | -0.75853500 | 3.70093600  |
| C | -0.04203300 | -2.25248700 | 3.29382900  |
| C | -1.50113600 | -2.52661800 | 2.55137800  |
| C | -2.64155800 | -1.46188600 | 2.53157400  |
| C | -1.96109400 | -0.15187500 | 2.44794800  |
| C | -0.72225000 | 0.14226200  | 2.96461900  |
| C | 2.53243700  | 1.86399300  | -0.15744600 |
| C | 1.56730000  | 2.77764300  | -0.15300000 |
| C | 1.01243900  | 3.43522400  | -1.36008100 |
| C | -0.54002100 | 3.68973900  | -1.25004200 |
| C | -1.08185000 | 2.48763500  | -1.93874500 |
| C | -2.26611000 | 1.82236600  | -1.67465900 |
| C | -2.49004800 | 0.56366400  | -2.19234300 |
| C | -1.55862800 | -0.02640400 | -3.02288900 |

|   |             |             |             |
|---|-------------|-------------|-------------|
| C | -1.50281800 | -1.47281400 | -3.38819500 |
| C | 0.13652900  | -1.71043200 | -3.56871900 |
| C | 0.83464000  | -2.70209600 | -2.61794500 |
| C | 2.34261200  | -2.44596300 | -2.07793700 |
| C | 2.91869800  | -1.00898400 | -2.37253300 |
| C | 3.69221800  | -0.24666600 | -1.19840600 |
| C | 3.24874100  | 1.29179800  | -1.33753200 |
| C | 2.36190600  | 1.39965800  | -2.59956500 |
| C | 1.21901200  | 2.51952200  | -2.61603100 |
| C | -0.12851500 | 1.89146200  | -2.72749700 |
| C | -0.36054500 | 0.63065600  | -3.23191500 |
| C | 0.69795100  | -0.33721300 | -3.32111700 |
| C | 1.87338700  | -0.02553500 | -2.77850700 |
| F | 4.30189500  | 1.84249000  | 1.36628000  |
| F | 2.92186600  | 3.09943300  | 2.94740000  |
| F | 1.87934800  | 4.56146700  | 1.27986100  |
| F | -0.40145200 | 4.51582500  | 2.35669100  |
| F | -1.51816200 | 5.19069400  | 0.27616100  |
| F | -3.41150700 | 3.82080300  | 1.09092700  |
| F | -4.18202100 | 3.09889900  | -1.25776200 |
| F | -5.40253800 | 1.10220300  | -0.47067700 |
| F | -4.70864800 | 0.10441600  | -2.55688000 |
| F | -4.66096200 | -2.20224700 | -1.93756900 |
| F | -2.70901300 | -3.43536400 | -2.84405300 |
| F | 2.56771600  | -4.25269000 | -0.54294400 |
| F | 4.21107600  | -3.04334800 | 0.74247800  |
| F | 4.91375000  | -0.75419900 | 0.75589900  |
| F | 3.25324700  | -2.56946300 | 2.97350900  |
| F | 1.27526300  | -4.14255500 | 2.61666900  |
| F | -3.97051800 | -3.35961100 | 0.09123300  |
| F | -4.90118600 | -1.79501200 | 1.68583300  |
| F | -4.86726700 | 0.64675500  | 1.82527100  |
| F | 1.27305300  | 2.05418800  | 4.40198100  |
| F | 2.42613300  | -0.25832900 | 4.44207700  |
| F | -0.03247700 | -0.64788900 | 5.03902000  |
| F | 0.00000800  | -2.99818800 | 4.40937700  |
| F | -1.97646200 | -3.69485900 | 3.04940100  |
| F | -3.38619100 | -1.56820700 | 3.66006500  |
| F | 1.64994200  | 4.62243000  | -1.51703000 |
| F | -0.81638100 | 4.79420700  | -1.99777800 |
| F | -2.07483400 | -1.69661600 | -4.59573000 |
| F | 0.34964500  | -2.07905600 | -4.85337900 |
| F | 0.80489400  | -3.94012500 | -3.18110600 |
| F | 3.16149300  | -3.32208400 | -2.70709600 |

|   |            |             |             |
|---|------------|-------------|-------------|
| F | 5.00587700 | -0.30318300 | -1.53349100 |
| F | 4.36846000 | 2.04943700  | -1.48776400 |
| F | 3.18911000 | 1.67673500  | -3.64690400 |
| F | 1.44993100 | 3.33511900  | -3.67910600 |
| O | 3.75371500 | -1.08815400 | -3.48367800 |
| H | 4.53300200 | -1.62678900 | -3.26714500 |

C<sub>1</sub>-S<sub>N</sub>2'-C52-F<sub>d</sub>

RC

|   |             |             |             |
|---|-------------|-------------|-------------|
| C | 2.60262400  | -1.63839900 | -0.79173800 |
| C | 2.77926900  | -2.21344300 | 0.56142600  |
| C | 1.76720900  | -3.32708400 | 0.99163000  |
| C | 1.15087500  | -2.74869900 | 2.38264800  |
| C | -0.37397000 | -2.81828300 | 2.61457000  |
| C | -1.09049100 | -1.71616800 | 3.53456400  |
| C | -2.50810900 | -1.41828400 | 2.74417200  |
| C | -3.07138600 | 0.02174900  | 2.58388900  |
| C | -3.96461400 | 0.45227700  | 1.26222500  |
| C | -3.40493300 | 1.89685700  | 0.89414100  |
| C | -3.33017700 | 2.39465500  | -0.58907400 |
| C | -1.97577000 | 3.25290400  | -0.95376100 |
| C | -1.21026500 | 2.26713300  | -1.74405700 |
| C | 0.14315600  | 2.29471800  | -1.97170900 |
| C | 0.74321100  | 1.24685400  | -2.62806500 |
| C | 2.21296400  | 1.36313500  | -2.67564900 |
| C | 2.88792800  | -0.05917700 | -2.61596600 |
| C | 3.47777200  | -0.49591600 | -1.20721100 |
| C | 1.78587000  | -2.06545000 | -1.74136700 |
| C | 1.92531300  | -1.31683200 | -3.02582700 |
| C | 0.53583200  | -1.04463900 | -3.65784100 |
| C | -0.00525600 | 0.19180600  | -3.07155000 |
| C | -1.35875100 | 0.16343900  | -2.84949700 |
| C | -1.95301500 | 1.18551800  | -2.14921400 |
| C | -3.36214200 | 1.26378300  | -1.71305800 |
| C | -3.92573900 | -0.16504700 | -1.43218500 |
| C | -3.97162400 | -0.59835200 | 0.10026500  |
| C | -2.81772400 | -1.51063600 | 0.22078100  |
| C | -2.18678100 | -1.88837600 | 1.38083000  |
| C | -1.04410600 | -2.64368900 | 1.31554800  |
| C | -0.54949200 | -3.04521200 | 0.10307000  |
| C | 0.74295000  | -3.72045200 | -0.13773300 |
| C | 0.98896600  | -3.31710000 | -1.64873100 |
| C | -0.44879400 | -3.11359800 | -2.26261200 |
| C | -0.66621100 | -2.08508500 | -3.42718600 |
| C | -1.99475700 | -1.11180100 | -3.23845300 |

|   |             |             |             |
|---|-------------|-------------|-------------|
| C | -3.07839500 | -1.38953100 | -2.15284500 |
| C | -2.35309600 | -1.95298800 | -0.99414800 |
| C | -1.20641400 | -2.70643100 | -1.05601200 |
| C | 2.56581100  | -1.07710100 | 1.49572500  |
| C | 1.64636100  | -1.33459000 | 2.41598800  |
| C | 1.31454200  | -0.44541800 | 3.55558600  |
| C | -0.23235000 | -0.43956200 | 3.85461900  |
| C | -0.66932000 | 0.72392700  | 3.04526100  |
| C | -1.90083200 | 0.91971200  | 2.45859700  |
| C | -2.07107300 | 1.92181300  | 1.53409500  |
| C | -1.03635700 | 2.78274700  | 1.24674800  |
| C | -1.01006000 | 3.77615500  | 0.14648600  |
| C | 0.61760800  | 3.92058100  | -0.13341100 |
| C | 1.12634200  | 3.28760000  | -1.47865600 |
| C | 2.44675700  | 2.41769200  | -1.53030500 |
| C | 2.65797400  | 1.72145700  | -0.23615500 |
| C | 3.62687500  | 0.59699200  | -0.11434900 |
| C | 3.42502200  | 0.13505300  | 1.37301100  |
| C | 2.79645900  | 1.35924100  | 2.10842300  |
| C | 1.69548400  | 1.04574700  | 3.21462900  |
| C | 0.37857100  | 1.56394300  | 2.74284700  |
| C | 0.18190900  | 2.59545400  | 1.84942500  |
| C | 1.28771500  | 3.30045700  | 1.16045000  |
| C | 2.26243000  | 2.18623500  | 0.94386800  |
| F | 4.06189700  | -2.67211500 | 0.67616300  |
| F | 2.47519300  | -4.43060400 | 1.29627700  |
| F | 1.74990200  | -3.41211200 | 3.40882500  |
| F | -0.66800700 | -4.04298800 | 3.13106800  |
| F | -1.39323100 | -2.29996600 | 4.70662500  |
| F | -3.44863500 | -2.20920400 | 3.32174600  |
| F | -3.81084600 | 0.33864100  | 3.67739500  |
| F | -5.23955700 | 0.60624000  | 1.66293000  |
| F | -4.18743000 | 2.79445300  | 1.56423700  |
| F | -4.39262100 | 3.19482700  | -0.79230500 |
| F | -2.37051600 | 4.29459100  | -1.73043800 |
| F | 2.57950200  | 1.93970000  | -3.85532500 |
| F | 3.91015800  | -0.04197800 | -3.49145300 |
| F | 4.72095600  | -1.01416500 | -1.42253100 |
| F | 2.62238800  | -2.09983200 | -3.89297800 |
| F | 0.70213400  | -0.89808600 | -5.00096800 |
| F | -4.08816400 | 1.77265700  | -2.75237600 |
| F | -5.18421500 | -0.20379800 | -1.90272700 |
| F | -5.10525100 | -1.34554800 | 0.25340300  |
| F | 0.57527600  | -5.07110600 | -0.09570000 |



|    |                                 |             |                          |
|----|---------------------------------|-------------|--------------------------|
| F  | 1.64134600                      | -4.29678800 | -2.31896100              |
| F  | -0.88922400                     | -4.32901100 | -2.69037700              |
| F  | -0.82948900                     | -2.78202600 | -4.56297900              |
| F  | -2.58571700                     | -1.02357200 | -4.45652500              |
| F  | -3.99396500                     | -2.26559700 | -2.63738800              |
| F  | 1.99005600                      | -0.88357800 | 4.64689300               |
| F  | -0.38663700                     | -0.15339000 | 5.17715900               |
| F  | -1.44302500                     | 4.98810000  | 0.57712800               |
| F  | 0.91240400                      | 5.23047800  | -0.15810300              |
| F  | 1.25230700                      | 4.29391000  | -2.38672600              |
| F  | 3.52501100                      | 3.17568700  | -1.84115600              |
| F  | 4.88644600                      | 1.11977100  | -0.22333800              |
| F  | 4.62990800                      | -0.17370800 | 1.91875900               |
| F  | 3.80003700                      | 2.05595100  | 2.70602600               |
| F  | 2.07333700                      | 1.65075800  | 4.37046200               |
| F  | 1.81335200                      | 4.27910900  | 1.94628700               |
| H  | 4.37895300                      | 4.35733400  | 1.57168500               |
| O  | 4.18615200                      | 4.24906400  | 0.63178000               |
| H  | 4.97534300                      | 3.82509800  | 0.26988700               |
| TS | imaginary vibrational frequency |             | -796.22 cm <sup>-1</sup> |
| C  | 2.73322600                      | 0.44525600  | 1.49900400               |
| C  | 2.90160700                      | 1.84875300  | 1.05111400               |
| C  | 1.94765500                      | 2.91247300  | 1.68647600               |
| C  | 1.22947400                      | 3.58951500  | 0.38890800               |
| C  | -0.29687000                     | 3.81890100  | 0.41294400               |
| C  | -1.13752000                     | 3.79093900  | -0.95773300              |
| C  | -2.52495900                     | 3.01624800  | -0.53980600              |
| C  | -3.19862400                     | 1.97130400  | -1.47256400              |
| C  | -4.05055100                     | 0.70331900  | -0.84849200              |
| C  | -3.60100900                     | -0.52686500 | -1.75558000              |
| C  | -3.47211700                     | -1.97140200 | -1.15560600              |
| C  | -2.16503000                     | -2.81040100 | -1.67683400              |
| C  | -1.27772100                     | -2.74032900 | -0.49958200              |
| C  | 0.08336700                      | -2.93094100 | -0.49274700              |
| C  | 0.78482700                      | -2.73195600 | 0.66422500               |
| C  | 2.23530700                      | -2.91180200 | 0.50363200               |
| C  | 3.00683900                      | -1.96752000 | 1.47953800               |
| C  | 3.55467500                      | -0.63218600 | 0.85109800               |
| C  | 2.02019100                      | 0.01802900  | 2.52931300               |
| C  | 2.16572700                      | -1.44810700 | 2.78406500               |
| C  | 0.78677000                      | -2.07773700 | 3.09798000               |
| C  | 0.13514800                      | -2.40305300 | 1.82121900               |
| C  | -1.22292500                     | -2.22159300 | 1.82203600               |
| C  | -1.92089600                     | -2.34672100 | 0.64566800               |

|   |             |             |             |
|---|-------------|-------------|-------------|
| C | -3.35719800 | -2.07574300 | 0.43276000  |
| C | -3.83319200 | -0.92883400 | 1.37413800  |
| C | -3.91605500 | 0.51097900  | 0.70190600  |
| C | -2.70316000 | 1.17960300  | 1.20853800  |
| C | -2.10027900 | 2.28894600  | 0.67302100  |
| C | -0.90867800 | 2.72834500  | 1.18859800  |
| C | -0.33494500 | 2.07784200  | 2.24884700  |
| C | 1.01102900  | 2.32586000  | 2.80511100  |
| C | 1.30413800  | 0.92032300  | 3.47356000  |
| C | -0.11576000 | 0.33492000  | 3.83965000  |
| C | -0.34595600 | -1.21660900 | 3.84123800  |
| C | -1.74945500 | -1.69680200 | 3.09814400  |
| C | -2.86615100 | -0.68378000 | 2.69642700  |
| C | -2.15779500 | 0.55279600  | 2.30212700  |
| C | -0.95859300 | 0.98896300  | 2.81137100  |
| C | 2.57784700  | 1.81916900  | -0.39279400 |
| C | 1.62292300  | 2.67821100  | -0.73402100 |
| C | 1.15721000  | 2.92237100  | -2.12606500 |
| C | -0.39366300 | 3.18914000  | -2.20659200 |
| C | -0.90579900 | 1.84243400  | -2.57226800 |
| C | -2.11632500 | 1.28018700  | -2.20834800 |
| C | -2.32448500 | -0.07050100 | -2.35684100 |
| C | -1.35294300 | -0.86678900 | -2.93286600 |
| C | -1.31497400 | -2.35357300 | -2.88795700 |
| C | 0.31413600  | -2.65623100 | -2.92033900 |
| C | 0.94981700  | -3.27620800 | -1.63855200 |
| C | 2.41452000  | -2.85915200 | -1.07934200 |
| C | 2.89294000  | -1.50337300 | -1.61338600 |
| C | 3.70543400  | -0.52053400 | -0.71263000 |
| C | 3.31815000  | 0.90453900  | -1.31149100 |
| C | 2.38108100  | 0.58251800  | -2.45781800 |
| C | 1.43659900  | 1.66730300  | -3.05068800 |
| C | 0.07308500  | 1.05289400  | -3.12864000 |
| C | -0.15794400 | -0.29889200 | -3.29889600 |
| C | 0.95690700  | -1.27161400 | -3.25743300 |
| C | 1.85146400  | -0.69619600 | -2.20717300 |
| F | 4.20731600  | 2.21219700  | 1.23807900  |
| F | 2.71370800  | 3.86000200  | 2.25989000  |
| F | 1.82010700  | 4.79801400  | 0.18111700  |
| F | -0.53715600 | 5.01339900  | 1.02109400  |
| F | -1.45692700 | 5.06218800  | -1.25762900 |
| F | -3.42961100 | 3.98083900  | -0.22409000 |
| F | -4.03246300 | 2.61694700  | -2.32961000 |
| F | -5.35443800 | 0.92817700  | -1.09738200 |

|    |             |             |             |
|----|-------------|-------------|-------------|
| F  | -4.51548500 | -0.61094900 | -2.76814600 |
| F  | -4.57380400 | -2.65273900 | -1.52089200 |
| F  | -2.57696500 | -4.08993200 | -1.88435300 |
| F  | 2.53690700  | -4.19092400 | 0.87979500  |
| F  | 4.06803100  | -2.66415200 | 1.93239900  |
| F  | 4.81193600  | -0.45579700 | 1.35887500  |
| F  | 2.96460200  | -1.62627800 | 3.86940400  |
| F  | 0.99114300  | -3.20858300 | 3.82801600  |
| F  | -4.04809800 | -3.19584400 | 0.80117000  |
| F  | -5.06288000 | -1.24598000 | 1.81609100  |
| F  | -4.99067100 | 1.13765700  | 1.26826600  |
| F  | 0.93871300  | 3.24384800  | 3.80828000  |
| F  | 2.04428600  | 1.06721400  | 4.59916700  |
| F  | -0.45080500 | 0.80558600  | 5.07324500  |
| F  | -0.39753800 | -1.62398200 | 5.11985700  |
| F  | -2.27924300 | -2.67957100 | 3.86846700  |
| F  | -3.69200300 | -0.47226800 | 3.75156800  |
| F  | 1.82726000  | 4.00213700  | -2.60374300 |
| F  | -0.59416200 | 4.03660400  | -3.25590900 |
| F  | -1.84032700 | -2.88892600 | -4.02018600 |
| F  | 0.53793800  | -3.50642400 | -3.94149200 |
| F  | 0.97390600  | -4.63006800 | -1.79304800 |
| F  | 3.31541900  | -3.81087500 | -1.41898800 |
| F  | 5.03137900  | -0.72819000 | -0.96796800 |
| F  | 4.45385000  | 1.55275700  | -1.67905200 |
| F  | 3.57531000  | 0.35161400  | -3.67983800 |
| F  | 1.87956300  | 2.11511700  | -4.24787700 |
| F  | 1.60702300  | -1.38213400 | -4.46914700 |
| H  | 3.85540600  | -0.86949700 | -3.35952900 |
| O  | 3.82662600  | -1.83665300 | -2.80108600 |
| H  | 4.71607500  | -2.12322100 | -2.50808100 |
| IP |             |             |             |
| C  | 2.98365400  | 0.61621900  | 0.91085000  |
| C  | 3.08940300  | 1.94482000  | 0.25679900  |
| C  | 2.22449100  | 3.10111500  | 0.86881200  |
| C  | 1.31200400  | 3.58861500  | -0.39193500 |
| C  | -0.19768000 | 3.84134400  | -0.17436600 |
| C  | -1.24169400 | 3.62608000  | -1.38018700 |
| C  | -2.54507600 | 2.94660500  | -0.64747600 |
| C  | -3.34772900 | 1.78636800  | -1.30123400 |
| C  | -4.09017200 | 0.64333200  | -0.37612200 |
| C  | -3.78148600 | -0.71705100 | -1.14939400 |
| C  | -3.56188200 | -2.05763900 | -0.36823600 |
| C  | -2.34240600 | -2.98434200 | -0.95454000 |

|   |             |             |             |
|---|-------------|-------------|-------------|
| C | -1.28637100 | -2.72767900 | 0.04206200  |
| C | 0.06155600  | -2.90665800 | -0.14411100 |
| C | 0.92875600  | -2.55985300 | 0.85149400  |
| C | 2.33465700  | -2.82864800 | 0.52642700  |
| C | 3.25281900  | -1.77628600 | 1.21968300  |
| C | 3.70093500  | -0.56636300 | 0.31638100  |
| C | 2.41774900  | 0.35590000  | 2.07945200  |
| C | 2.61270200  | -1.05099900 | 2.53761600  |
| C | 1.30357700  | -1.60410600 | 3.14816900  |
| C | 0.46244100  | -2.07489100 | 2.04014600  |
| C | -0.87903200 | -1.88400400 | 2.22823600  |
| C | -1.74927400 | -2.17027700 | 1.20449200  |
| C | -3.20337300 | -1.92481000 | 1.18094300  |
| C | -3.53455000 | -0.64388600 | 2.00601700  |
| C | -3.72205400 | 0.68162700  | 1.14812200  |
| C | -2.44830500 | 1.39712400  | 1.36264700  |
| C | -1.93668800 | 2.40183800  | 0.58178700  |
| C | -0.68068000 | 2.88876200  | 0.83806300  |
| C | 0.05086300  | 2.39160300  | 1.88371800  |
| C | 1.46666100  | 2.69449300  | 2.18675700  |
| C | 1.86292400  | 1.39197000  | 2.99029600  |
| C | 0.52083500  | 0.89990600  | 3.66206700  |
| C | 0.29712900  | -0.62926500 | 3.92903400  |
| C | -1.20441800 | -1.18407600 | 3.48632500  |
| C | -2.37590000 | -0.22273800 | 3.11875600  |
| C | -1.74100700 | 0.93148200  | 2.44478800  |
| C | -0.47736600 | 1.41302400  | 2.69408400  |
| C | 2.56459500  | 1.71833100  | -1.10647800 |
| C | 1.54262800  | 2.51772500  | -1.41008500 |
| C | 0.84966300  | 2.55062100  | -2.72872700 |
| C | -0.69520600 | 2.83041900  | -2.61894400 |
| C | -1.25391100 | 1.45259500  | -2.70363800 |
| C | -2.38975000 | 0.97093300  | -2.08230200 |
| C | -2.61135100 | -0.38254600 | -1.99800700 |
| C | -1.73144600 | -1.27354100 | -2.58995400 |
| C | -1.69158400 | -2.73867900 | -2.34103100 |
| C | -0.08298800 | -3.08213300 | -2.59137900 |
| C | 0.73890500  | -3.48121900 | -1.32219100 |
| C | 2.27559100  | -3.04618100 | -1.04704200 |
| C | 2.76903200  | -1.86758000 | -1.93982200 |
| C | 3.62587600  | -0.69802600 | -1.25846800 |
| C | 3.09442100  | 0.61698800  | -1.97717400 |
| C | 1.91196100  | 0.16870300  | -2.75752600 |
| C | 0.98944600  | 1.15152900  | -3.44472000 |

|                                                      |             |             |             |
|------------------------------------------------------|-------------|-------------|-------------|
| C                                                    | -0.37379600 | 0.57011900  | -3.28361800 |
| C                                                    | -0.61144100 | -0.79104100 | -3.21967200 |
| C                                                    | 0.48609700  | -1.79609900 | -3.29713600 |
| C                                                    | 1.65629400  | -1.13199100 | -2.61729100 |
| F                                                    | 4.40544300  | 2.30807100  | 0.20526300  |
| F                                                    | 3.05561800  | 4.11399700  | 1.17898100  |
| F                                                    | 1.85287000  | 4.74247800  | -0.87107900 |
| F                                                    | -0.35119900 | 5.11642700  | 0.27828700  |
| F                                                    | -1.60915200 | 4.84303100  | -1.81614500 |
| F                                                    | -3.39930100 | 3.96102700  | -0.35085000 |
| F                                                    | -4.30216400 | 2.31283400  | -2.11139100 |
| F                                                    | -5.41656000 | 0.85596500  | -0.45947900 |
| F                                                    | -4.83701000 | -0.92903800 | -1.99132200 |
| F                                                    | -4.70304400 | -2.76419700 | -0.45574700 |
| F                                                    | -2.76292000 | -4.27457100 | -0.88533200 |
| F                                                    | 2.64955200  | -4.03766700 | 1.08570900  |
| F                                                    | 4.36590200  | -2.42516700 | 1.61446400  |
| F                                                    | 5.01846200  | -0.34804800 | 0.60905500  |
| F                                                    | 3.56390400  | -1.05075600 | 3.50985000  |
| F                                                    | 1.61564100  | -2.63658800 | 3.97827400  |
| F                                                    | -3.81485100 | -2.96978500 | 1.81198700  |
| F                                                    | -4.68060000 | -0.87018500 | 2.67094800  |
| F                                                    | -4.70413000 | 1.40154100  | 1.76796900  |
| F                                                    | 1.53885700  | 3.74460000  | 3.05055700  |
| F                                                    | 2.78487100  | 1.66001100  | 3.94710000  |
| F                                                    | 0.38907700  | 1.55334900  | 4.84908600  |
| F                                                    | 0.44350200  | -0.84630300 | 5.24503500  |
| F                                                    | -1.60344200 | -2.04217500 | 4.45736300  |
| F                                                    | -3.03455400 | 0.14873600  | 4.24340500  |
| F                                                    | 1.43020900  | 3.52352000  | -3.47644600 |
| F                                                    | -1.05322300 | 3.51428800  | -3.74285400 |
| F                                                    | -2.38720400 | -3.41841800 | -3.28598900 |
| F                                                    | -0.02442800 | -4.10405500 | -3.46361300 |
| F                                                    | 0.69419600  | -4.84077400 | -1.22704200 |
| F                                                    | 3.07250600  | -4.11299800 | -1.31591200 |
| F                                                    | 4.90216500  | -0.89197000 | -1.66382000 |
| F                                                    | 4.07544100  | 1.13631500  | -2.77090100 |
| F                                                    | 1.37156000  | 1.33795400  | -4.73675500 |
| F                                                    | 0.83924300  | -2.10219700 | -4.57845200 |
| O                                                    | 3.47661700  | -2.39563100 | -3.01678500 |
| H                                                    | 4.12562900  | -3.04372300 | -2.69488400 |
| C <sub>1</sub> -S <sub>N</sub> 2'-C40-F <sub>g</sub> |             |             |             |
| RC                                                   |             |             |             |
| C                                                    | -2.73712900 | -1.13255400 | -0.97542200 |

|   |             |             |             |
|---|-------------|-------------|-------------|
| C | -3.36129800 | 0.20855100  | -1.10044000 |
| C | -2.84633700 | 1.11570700  | -2.26808400 |
| C | -2.35049000 | 2.46450800  | -1.50630500 |
| C | -0.99404200 | 3.09088400  | -1.89733100 |
| C | -0.15510700 | 3.91687700  | -0.80939000 |
| C | 1.40502000  | 3.48122900  | -1.11922600 |
| C | 2.41337500  | 3.17896800  | 0.02274300  |
| C | 3.62863200  | 2.07814400  | -0.17589800 |
| C | 3.63555000  | 1.28351400  | 1.20335300  |
| C | 4.00438600  | -0.23702000 | 1.26757900  |
| C | 3.08808200  | -1.11254800 | 2.31136300  |
| C | 2.21844400  | -1.86136000 | 1.38034300  |
| C | 1.01167200  | -2.43652000 | 1.69170700  |
| C | 0.24341600  | -2.99525700 | 0.69828400  |
| C | -1.08088900 | -3.44174600 | 1.17792200  |
| C | -2.16659900 | -3.26349600 | 0.04848000  |
| C | -3.11756300 | -1.99877100 | 0.18636400  |
| C | -1.93678700 | -1.72565400 | -1.84615500 |
| C | -1.59302400 | -3.13107300 | -1.47650500 |
| C | -0.09903300 | -3.42490700 | -1.76313400 |
| C | 0.68838600  | -2.99607000 | -0.59528100 |
| C | 1.89652800  | -2.42619900 | -0.91112300 |
| C | 2.64158000  | -1.82346500 | 0.07434400  |
| C | 3.89100000  | -1.05340500 | -0.09795400 |
| C | 3.90810000  | -0.34288300 | -1.48726800 |
| C | 3.52378000  | 1.20383800  | -1.47250000 |
| C | 2.13942900  | 1.20302000  | -1.98442900 |
| C | 1.21481600  | 2.20831800  | -1.84512100 |
| C | -0.07448200 | 2.00343200  | -2.26100700 |
| C | -0.43470900 | 0.81986900  | -2.84724900 |
| C | -1.80443300 | 0.39822700  | -3.20824600 |
| C | -1.61904600 | -1.17368900 | -3.18850100 |
| C | -0.10304000 | -1.41902800 | -3.54584700 |
| C | 0.64466600  | -2.67383400 | -2.97240900 |
| C | 2.15397400  | -2.35426800 | -2.36439800 |
| C | 2.86737700  | -0.98815700 | -2.59905700 |
| C | 1.79513900  | 0.02961800  | -2.61026700 |
| C | 0.50195000  | -0.17041300 | -3.02776000 |
| C | -3.00881900 | 0.92034200  | 0.15878900  |
| C | -2.37472400 | 2.06580900  | -0.06240600 |
| C | -1.99529200 | 3.04148300  | 0.98810000  |
| C | -0.61025900 | 3.72543800  | 0.68065900  |
| C | 0.31755800  | 2.84160800  | 1.42806600  |
| C | 1.63389100  | 2.56959400  | 1.12467200  |

|   |             |             |             |
|---|-------------|-------------|-------------|
| C | 2.28386100  | 1.53506900  | 1.75318800  |
| C | 1.64956900  | 0.82098400  | 2.74405600  |
| C | 2.14954300  | -0.43577200 | 3.35040500  |
| C | 0.74194800  | -1.15981100 | 3.82057500  |
| C | 0.31942400  | -2.42914400 | 2.99887900  |
| C | -1.17695000 | -2.63683700 | 2.52854300  |
| C | -1.84947800 | -1.33219300 | 2.30145700  |
| C | -3.12777600 | -1.23976200 | 1.53887200  |
| C | -3.37958300 | 0.31650200  | 1.47458300  |
| C | -2.52897000 | 0.92101700  | 2.63961000  |
| C | -1.81514500 | 2.31644900  | 2.37448600  |
| C | -0.33469400 | 2.11229400  | 2.39777300  |
| C | 0.34591900  | 1.11445000  | 3.06670800  |
| C | -0.33128200 | 0.00824200  | 3.78541700  |
| C | -1.54258800 | -0.20603300 | 2.93312300  |
| F | -4.71041300 | 0.02029800  | -1.21688700 |
| F | -3.91078800 | 1.45210900  | -3.02489400 |
| F | -3.29048000 | 3.43176000  | -1.70260100 |
| F | -1.19247300 | 3.90427700  | -2.97212200 |
| F | -0.28119400 | 5.22214000  | -1.10343400 |
| F | 1.92273800  | 4.43323000  | -1.93772000 |
| F | 2.99679300  | 4.33673100  | 0.42668400  |
| F | 4.78560800  | 2.75978500  | -0.25435500 |
| F | 4.52260000  | 1.93047700  | 2.01730000  |
| F | 5.28435900  | -0.31720100 | 1.67413600  |
| F | 3.93107700  | -1.95362900 | 2.96567700  |
| F | -1.02313300 | -4.76693100 | 1.48926800  |
| F | -2.94513700 | -4.36084500 | 0.08360300  |
| F | -4.39368500 | -2.42438000 | -0.03869400 |
| F | -2.33075000 | -3.96227800 | -2.26186500 |
| F | 0.04213900  | -4.76412900 | -1.96110300 |
| F | 4.92646600  | -1.94473000 | -0.10043400 |
| F | 5.15419400  | -0.44703000 | -1.98094700 |
| F | 4.31275000  | 1.80251400  | -2.41305000 |
| F | -2.08145000 | 0.75965300  | -4.49164200 |
| F | -2.41620000 | -1.77394200 | -4.10533600 |
| F | 0.00524800  | -1.45141600 | -4.90318900 |
| F | 0.78911700  | -3.55627900 | -3.97404400 |
| F | 2.95941100  | -3.36391400 | -2.77884100 |
| F | 3.53223500  | -1.02108400 | -3.78089800 |
| F | -2.95678300 | 3.99143700  | 1.05656300  |
| F | -0.62762100 | 4.95435500  | 1.26987500  |
| F | 2.85677800  | -0.17968100 | 4.48039700  |
| F | 0.89081100  | -1.53493000 | 5.10311000  |

|    |                                 |             |                          |
|----|---------------------------------|-------------|--------------------------|
| F  | 0.67990900                      | -3.52956700 | 3.71551900               |
| F  | -1.87671600                     | -3.34398000 | 3.44957700               |
| F  | -4.10384500                     | -1.79726600 | 2.31122000               |
| F  | -4.69654200                     | 0.54994500  | 1.69536800               |
| F  | -3.33896300                     | 1.06339600  | 3.71910200               |
| F  | -2.19946400                     | 3.18219100  | 3.34704100               |
| F  | -0.70477500                     | 0.33745700  | 5.05256400               |
| H  | -5.52376000                     | 2.92000700  | -1.04286500              |
| O  | -5.42703500                     | 2.53118500  | -0.16432400              |
| H  | -6.11104200                     | 1.85094400  | -0.12746900              |
| TS | imaginary vibrational frequency |             | -792.44 cm <sup>-1</sup> |
| C  | -2.76205800                     | -0.93008700 | -0.95625600              |
| C  | -3.38362300                     | 0.39492600  | -1.19342400              |
| C  | -2.71122400                     | 1.22786100  | -2.33689400              |
| C  | -2.03886900                     | 2.38954500  | -1.50950500              |
| C  | -0.78943900                     | 3.09912900  | -2.00219600              |
| C  | 0.10728800                      | 3.88966100  | -0.93384600              |
| C  | 1.63847900                      | 3.35636400  | -1.21088900              |
| C  | 2.60808400                      | 3.01924900  | -0.04175100              |
| C  | 3.75004900                      | 1.84199700  | -0.18809400              |
| C  | 3.69443300                      | 1.09200800  | 1.21783400               |
| C  | 3.95697500                      | -0.44640200 | 1.33440300               |
| C  | 2.97141900                      | -1.22834900 | 2.39210800               |
| C  | 2.06743300                      | -1.95108400 | 1.47334700               |
| C  | 0.82442400                      | -2.44583100 | 1.78423700               |
| C  | 0.03470400                      | -2.97860000 | 0.79336800               |
| C  | -1.32783800                     | -3.30909600 | 1.25937300               |
| C  | -2.37887700                     | -3.08597000 | 0.10841400               |
| C  | -3.23499800                     | -1.75438300 | 0.19391900               |
| C  | -2.00696900                     | -1.60741800 | -1.80929600              |
| C  | -1.77535300                     | -3.02763500 | -1.40418800              |
| C  | -0.30565100                     | -3.44146000 | -1.66263200              |
| C  | 0.49467600                      | -3.04168600 | -0.49381500              |
| C  | 1.73713700                      | -2.55222500 | -0.80696800              |
| C  | 2.50679600                      | -1.97377800 | 0.17279200               |
| C  | 3.80512800                      | -1.29218000 | -0.00819600              |
| C  | 3.88637600                      | -0.62574400 | -1.41940100              |
| C  | 3.60660000                      | 0.94177100  | -1.46143400              |
| C  | 2.23918900                      | 1.02401900  | -2.01636800              |
| C  | 1.38319700                      | 2.09718700  | -1.94007200              |
| C  | 0.09792800                      | 1.97952400  | -2.40591000              |
| C  | -0.32565400                     | 0.79369500  | -2.95474900              |
| C  | -1.72363000                     | 0.42261500  | -3.27030900              |
| C  | -1.63829700                     | -1.14425200 | -3.17239200              |



|   |             |             |             |
|---|-------------|-------------|-------------|
| C | -0.14455200 | -1.50307200 | -3.51332300 |
| C | 0.50924800  | -2.78078100 | -2.88097000 |
| C | 2.02063700  | -2.54085800 | -2.25679000 |
| C | 2.82775500  | -1.23658700 | -2.52903800 |
| C | 1.83444400  | -0.14487900 | -2.61311100 |
| C | 0.54148500  | -0.26883700 | -3.06203800 |
| C | -3.29728600 | 1.27082300  | 0.05922300  |
| C | -2.07007700 | 2.03455400  | -0.15115200 |
| C | -1.76998300 | 3.10471500  | 0.82754700  |
| C | -0.38234500 | 3.76296400  | 0.54979100  |
| C | 0.49397300  | 2.88122100  | 1.35972000  |
| C | 1.78619700  | 2.50606300  | 1.07684200  |
| C | 2.36049500  | 1.45210900  | 1.74862100  |
| C | 1.67015900  | 0.81370500  | 2.75304900  |
| C | 2.06586400  | -0.46023900 | 3.39583700  |
| C | 0.60150200  | -1.07162500 | 3.85707500  |
| C | 0.10470400  | -2.33658800 | 3.07301400  |
| C | -1.39162300 | -2.44704900 | 2.57140600  |
| C | -1.95909400 | -1.10670300 | 2.27806200  |
| C | -3.22924600 | -0.97523600 | 1.51594300  |
| C | -3.48372300 | 0.59595300  | 1.44463700  |
| C | -2.51038500 | 1.18705300  | 2.56078600  |
| C | -1.68354300 | 2.50281100  | 2.25695000  |
| C | -0.21704600 | 2.22419700  | 2.34314400  |
| C | 0.38357800  | 1.20488200  | 3.04694700  |
| C | -0.38995300 | 0.16525300  | 3.76576400  |
| C | -1.59679600 | 0.01194400  | 2.88687500  |
| F | -4.70398200 | 0.17268000  | -1.51267800 |
| F | -3.70047700 | 1.68668200  | -3.13341400 |
| F | -3.26508900 | 3.57557100  | -1.69313600 |
| F | -1.06101900 | 3.91311300  | -3.05314800 |
| F | 0.06915300  | 5.19263400  | -1.26684300 |
| F | 2.23445900  | 4.26745000  | -2.02531100 |
| F | 3.26164800  | 4.15204700  | 0.32752000  |
| F | 4.95006400  | 2.44613800  | -0.27124600 |
| F | 4.62198500  | 1.70431500  | 2.01434300  |
| F | 5.22314900  | -0.60207200 | 1.76195900  |
| F | 3.75086200  | -2.09970100 | 3.08458100  |
| F | -1.37820600 | -4.62294700 | 1.61728200  |
| F | -3.23699800 | -4.12227600 | 0.15733000  |
| F | -4.53506900 | -2.08639300 | -0.06397700 |
| F | -2.56545000 | -3.81326000 | -2.18480200 |
| F | -0.26862700 | -4.79214400 | -1.82426200 |
| F | 4.77810000  | -2.25141100 | 0.02918700  |

|    |             |             |             |
|----|-------------|-------------|-------------|
| F  | 5.13137400  | -0.82763300 | -1.88674400 |
| F  | 4.45674200  | 1.45556300  | -2.40046300 |
| F  | -2.01467000 | 0.73256800  | -4.56255600 |
| F  | -2.47383600 | -1.73415500 | -4.06284400 |
| F  | -0.04691600 | -1.60986500 | -4.86812500 |
| F  | 0.61003500  | -3.70636200 | -3.84916500 |
| F  | 2.76423700  | -3.61620800 | -2.62134800 |
| F  | 3.51419700  | -1.36756300 | -3.69265800 |
| F  | -2.72625900 | 4.09238500  | 0.84038700  |
| F  | -0.38756300 | 5.01278600  | 1.09712300  |
| F  | 2.77046000  | -0.23332300 | 4.53437000  |
| F  | 0.70504400  | -1.41360800 | 5.15362900  |
| F  | 0.35811300  | -3.43350100 | 3.84022100  |
| F  | -2.17288100 | -3.05769300 | 3.49630200  |
| F  | -4.20738400 | -1.52150600 | 2.29916200  |
| F  | -4.76806500 | 0.79645600  | 1.82919000  |
| F  | -3.27432800 | 1.42663000  | 3.65904800  |
| F  | -2.04225300 | 3.45268000  | 3.16229500  |
| F  | -0.77245600 | 0.54323300  | 5.01736100  |
| H  | -4.06633500 | 3.01157800  | -0.85339100 |
| O  | -4.44164200 | 2.28354400  | -0.08842700 |
| H  | -5.27671800 | 1.84327100  | -0.35244800 |
| PC |             |             |             |
| C  | -2.67123100 | -1.01467900 | -1.11112900 |
| C  | -3.36410500 | 0.28034500  | -1.35528100 |
| C  | -2.59573800 | 1.17727800  | -2.36762100 |
| C  | -1.92078700 | 2.17563200  | -1.43749600 |
| C  | -0.80879600 | 3.05320100  | -1.91423300 |
| C  | -0.01233700 | 3.88352400  | -0.82444700 |
| C  | 1.56062200  | 3.43337300  | -1.04420900 |
| C  | 2.46528100  | 3.08565200  | 0.16342100  |
| C  | 3.66575900  | 1.97030200  | 0.03951300  |
| C  | 3.56577800  | 1.17235300  | 1.41346200  |
| C  | 3.90078400  | -0.35257100 | 1.49711200  |
| C  | 2.89913800  | -1.20994100 | 2.48194300  |
| C  | 2.06713300  | -1.92549900 | 1.49331200  |
| C  | 0.83110500  | -2.47486200 | 1.72673000  |
| C  | 0.11105800  | -3.00535200 | 0.68338600  |
| C  | -1.25015900 | -3.42507800 | 1.07499900  |
| C  | -2.25644500 | -3.20339900 | -0.11629200 |
| C  | -3.16677600 | -1.91230900 | -0.02691300 |
| C  | -1.84150100 | -1.62945500 | -1.94571800 |
| C  | -1.58220200 | -3.05992100 | -1.59201100 |
| C  | -0.08990100 | -3.40999500 | -1.79549100 |

|   |             |             |             |
|---|-------------|-------------|-------------|
| C | 0.63388900  | -3.00650600 | -0.58016300 |
| C | 1.86989900  | -2.46181400 | -0.81757500 |
| C | 2.56732600  | -1.88618800 | 0.21550700  |
| C | 3.84805100  | -1.15831100 | 0.12277600  |
| C | 3.97327000  | -0.44674200 | -1.26250300 |
| C | 3.63374900  | 1.10842300  | -1.27140100 |
| C | 2.30228100  | 1.15979500  | -1.91127200 |
| C | 1.41150200  | 2.20556500  | -1.85764700 |
| C | 0.16581100  | 2.05792400  | -2.41332500 |
| C | -0.19867400 | 0.87452300  | -3.02047200 |
| C | -1.58844300 | 0.44656300  | -3.34813300 |
| C | -1.43671400 | -1.11473200 | -3.28142700 |
| C | 0.07986700  | -1.41270300 | -3.58387900 |
| C | 0.75577200  | -2.68272400 | -2.95456100 |
| C | 2.22459700  | -2.40248900 | -2.24960300 |
| C | 2.99512800  | -1.06388600 | -2.44644600 |
| C | 1.96997600  | -0.00315000 | -2.56400000 |
| C | 0.70883300  | -0.15859300 | -3.09669300 |
| C | -3.52144900 | 1.13676100  | -0.05993600 |
| C | -2.36248400 | 2.08806500  | -0.18851700 |
| C | -2.02152800 | 3.06162000  | 0.87959400  |
| C | -0.59569800 | 3.71789600  | 0.63018100  |
| C | 0.26705600  | 2.80004600  | 1.42186700  |
| C | 1.59225700  | 2.48835400  | 1.19775200  |
| C | 2.18395400  | 1.44554300  | 1.86936000  |
| C | 1.47953300  | 0.74923200  | 2.82407500  |
| C | 1.91221400  | -0.51474700 | 3.46354300  |
| C | 0.45566000  | -1.20499900 | 3.84141400  |
| C | 0.05797800  | -2.45988300 | 2.98782900  |
| C | -1.40872100 | -2.62590800 | 2.41978600  |
| C | -2.02761200 | -1.30247800 | 2.14806700  |
| C | -3.26441700 | -1.20672100 | 1.32803100  |
| C | -3.60255500 | 0.34463300  | 1.30731800  |
| C | -2.70459800 | 0.95517700  | 2.47710800  |
| C | -1.91956600 | 2.32306300  | 2.25845600  |
| C | -0.45133500 | 2.07988700  | 2.35074200  |
| C | 0.16560600  | 1.07216300  | 3.06091300  |
| C | -0.58647100 | -0.00939700 | 3.73888100  |
| C | -1.75102800 | -0.18966300 | 2.81074500  |
| F | -4.59986600 | -0.01338900 | -1.85343900 |
| F | -3.50220000 | 1.84012600  | -3.12993700 |
| F | -2.75160600 | 5.16151400  | -1.25337200 |
| F | -1.24023900 | 3.87646700  | -2.92857100 |
| F | -0.08147300 | 5.18549600  | -1.15745700 |

|    |             |             |             |
|----|-------------|-------------|-------------|
| F  | 2.15824600  | 4.41282000  | -1.77125300 |
| F  | 3.03605800  | 4.22739100  | 0.62791900  |
| F  | 4.83776700  | 2.62922400  | 0.04441000  |
| F  | 4.40473700  | 1.80136900  | 2.28953200  |
| F  | 5.15073500  | -0.46279300 | 1.97851100  |
| F  | 3.67754800  | -2.07697700 | 3.17831900  |
| F  | -1.24450100 | -4.75420300 | 1.36933700  |
| F  | -3.06878400 | -4.27501000 | -0.14496100 |
| F  | -4.43827300 | -2.27432200 | -0.37083500 |
| F  | -2.30645500 | -3.83605400 | -2.44157100 |
| F  | 0.01336500  | -4.75308500 | -1.98353800 |
| F  | 4.84930500  | -2.08563200 | 0.17949500  |
| F  | 5.24647600  | -0.58453000 | -1.66969100 |
| F  | 4.51509000  | 1.68888200  | -2.13872900 |
| F  | -1.90690300 | 0.77583000  | -4.62633300 |
| F  | -2.21874500 | -1.70838400 | -4.21586900 |
| F  | 0.21861000  | -1.48912500 | -4.93611300 |
| F  | 0.94087400  | -3.57349800 | -3.94087700 |
| F  | 3.02855400  | -3.43847000 | -2.59725000 |
| F  | 3.74552300  | -1.14040100 | -3.57386700 |
| F  | -2.98571300 | 3.99709800  | 0.97474100  |
| F  | -0.61070300 | 4.94647300  | 1.21119600  |
| F  | 2.54961900  | -0.27353000 | 4.63641200  |
| F  | 0.51204600  | -1.58620200 | 5.12827800  |
| F  | 0.34758100  | -3.57184000 | 3.71785900  |
| F  | -2.19147500 | -3.30816200 | 3.28941500  |
| F  | -4.23609400 | -1.85885100 | 2.03541000  |
| F  | -4.90300300 | 0.43253600  | 1.70074600  |
| F  | -3.51581800 | 1.13088300  | 3.55105900  |
| F  | -2.30780600 | 3.19030200  | 3.22855700  |
| F  | -1.02200900 | 0.33197500  | 4.98187800  |
| O  | -4.63170800 | 1.96602300  | -0.17385100 |
| H  | -5.43085200 | 1.45253600  | 0.02705100  |
| H  | -2.33726900 | 5.27073300  | -2.07751600 |
| IP |             |             |             |
| C  | 2.80105800  | 1.01047800  | -0.79731100 |
| C  | 3.25618100  | -0.06458400 | -1.71811400 |
| C  | 2.31994300  | -0.21812400 | -2.94983300 |
| C  | 1.49902300  | -1.43537100 | -2.55692200 |
| C  | 0.26300700  | -1.81029700 | -3.30550400 |
| C  | -0.63595600 | -2.95606400 | -2.67950800 |
| C  | -2.11391700 | -2.25805500 | -2.49166300 |
| C  | -2.91679900 | -2.44425800 | -1.17679200 |
| C  | -3.91497800 | -1.27174600 | -0.60873900 |

|   |             |             |             |
|---|-------------|-------------|-------------|
| C | -3.65393500 | -1.29606100 | 0.96342000  |
| C | -3.71940800 | 0.00833100  | 1.82305000  |
| C | -2.56344200 | 0.11125400  | 2.98806300  |
| C | -1.64790500 | 1.10999800  | 2.40027800  |
| C | -0.33227600 | 1.29760200  | 2.74179300  |
| C | 0.43998700  | 2.18257400  | 2.02895800  |
| C | 1.86216100  | 2.15755700  | 2.42777000  |
| C | 2.78553400  | 2.43307500  | 1.18314000  |
| C | 3.46917600  | 1.16555800  | 0.52821800  |
| C | 2.06487100  | 2.06435300  | -1.12825300 |
| C | 2.06142300  | 3.14279900  | -0.09151800 |
| C | 0.64503000  | 3.74654700  | 0.06155700  |
| C | -0.10578700 | 2.88952200  | 0.99274400  |
| C | -1.41884300 | 2.70048100  | 0.64529400  |
| C | -2.17904400 | 1.78600800  | 1.33049800  |
| C | -3.56557100 | 1.38068400  | 1.02559500  |
| C | -3.84046200 | 1.48506900  | -0.50972300 |
| C | -3.77294700 | 0.11862700  | -1.32339700 |
| C | -2.49187900 | 0.21997600  | -2.05715800 |
| C | -1.78945800 | -0.81744600 | -2.62558700 |
| C | -0.55095000 | -0.57756600 | -3.17062900 |
| C | -0.00652500 | 0.69055600  | -3.13962900 |
| C | 1.43185900  | 1.03361000  | -3.34075300 |
| C | 1.54454300  | 2.35005900  | -2.49283900 |
| C | 0.09561800  | 2.95941000  | -2.45082000 |
| C | -0.34125700 | 3.81552100  | -1.20920400 |
| C | -1.81453200 | 3.41570700  | -0.58301400 |
| C | -2.80525500 | 2.47778700  | -1.33335900 |
| C | -1.98327400 | 1.49728900  | -2.07667200 |
| C | -0.72803700 | 1.73079000  | -2.59537800 |
| C | 3.29652900  | -1.46907900 | -1.03870500 |
| C | 1.98335500  | -2.05082800 | -1.48673500 |
| C | 1.50486800  | -3.37470400 | -1.02245000 |
| C | -0.01262300 | -3.61862900 | -1.39786100 |
| C | -0.68043900 | -3.12929900 | -0.17056600 |
| C | -1.93828400 | -2.57601900 | -0.07452000 |
| C | -2.33021500 | -1.95009200 | 1.08330400  |
| C | -1.49253200 | -1.92997200 | 2.17571300  |
| C | -1.68565600 | -1.10801400 | 3.39344500  |
| C | -0.12384700 | -0.90187400 | 3.90090900  |
| C | 0.45815700  | 0.54451000  | 3.73894300  |
| C | 1.91776800  | 0.77546900  | 3.17794700  |
| C | 2.30570200  | -0.30078700 | 2.22914100  |
| C | 3.48635400  | -0.13550000 | 1.33901700  |

|   |             |             |             |
|---|-------------|-------------|-------------|
| C | 3.55240300  | -1.49603900 | 0.52095100  |
| C | 2.58969800  | -2.48497700 | 1.32468700  |
| C | 1.58213000  | -3.44138900 | 0.54076700  |
| C | 0.17680900  | -3.08560200 | 0.90596900  |
| C | -0.24374400 | -2.49626400 | 2.07897800  |
| C | 0.69785700  | -2.00989700 | 3.11292800  |
| C | 1.85363700  | -1.54558300 | 2.27556800  |
| F | 4.51261900  | 0.26544000  | -2.13679600 |
| F | 3.08174900  | -0.54078600 | -4.02578100 |
| F | 0.57794900  | -2.10917300 | -4.59669900 |
| F | -0.76376500 | -3.92080000 | -3.60838700 |
| F | -2.88091600 | -2.67328400 | -3.53276700 |
| F | -3.66174500 | -3.57643600 | -1.28078100 |
| F | -5.18153400 | -1.68234500 | -0.80576800 |
| F | -4.57422300 | -2.15657400 | 1.49231400  |
| F | -4.91902100 | 0.02844000  | 2.43039200  |
| F | -3.17025300 | 0.60506600  | 4.09836700  |
| F | 2.09311700  | 3.14096300  | 3.34107700  |
| F | 3.76606800  | 3.25456700  | 1.60259200  |
| F | 4.77166600  | 1.48978800  | 0.27113200  |
| F | 2.88869200  | 4.13452400  | -0.52005100 |
| F | 0.76970000  | 5.00580000  | 0.56034500  |
| F | -4.39926500 | 2.27544600  | 1.63502100  |
| F | -5.08217500 | 1.98042500  | -0.65722000 |
| F | -4.77039900 | 0.17966400  | -2.25612200 |
| F | 1.68066500  | 1.35389100  | -4.63698800 |
| F | 2.39219900  | 3.22580700  | -3.08759800 |
| F | -0.04672900 | 3.73061800  | -3.56520500 |
| F | -0.40265300 | 5.09860600  | -1.60206700 |
| F | -2.44215900 | 4.58269200  | -0.28632800 |
| F | -3.56539900 | 3.21795200  | -2.18003500 |
| F | 2.27780800  | -4.34664100 | -1.56447500 |
| F | -0.18893700 | -4.96590400 | -1.49965600 |
| F | -2.32607500 | -1.80839800 | 4.36310400  |
| F | -0.08082200 | -1.21537600 | 5.20794900  |
| F | 0.37909500  | 1.16197900  | 4.95015900  |
| F | 2.81786400  | 0.82057300  | 4.18937800  |
| F | 4.57821800  | -0.06598900 | 2.16041400  |
| F | 4.82550800  | -1.94987300 | 0.67355600  |
| F | 3.37976600  | -3.28662900 | 2.08524100  |
| F | 1.85689400  | -4.72448100 | 0.89151300  |
| F | 1.10411700  | -2.98465200 | 3.97131800  |
| O | 4.24056100  | -2.27083100 | -1.67236600 |
| H | 5.12746700  | -2.01995100 | -1.36437100 |

C<sub>1</sub>-S<sub>N</sub>2'-C40-F<sub>h</sub>

RC

|   |             |             |             |
|---|-------------|-------------|-------------|
| C | -2.73712900 | -1.13255400 | -0.97542200 |
| C | -3.36129800 | 0.20855100  | -1.10044000 |
| C | -2.84633700 | 1.11570700  | -2.26808400 |
| C | -2.35049000 | 2.46450800  | -1.50630500 |
| C | -0.99404200 | 3.09088400  | -1.89733100 |
| C | -0.15510700 | 3.91687700  | -0.80939000 |
| C | 1.40502000  | 3.48122900  | -1.11922600 |
| C | 2.41337500  | 3.17896800  | 0.02274300  |
| C | 3.62863200  | 2.07814400  | -0.17589800 |
| C | 3.63555000  | 1.28351400  | 1.20335300  |
| C | 4.00438600  | -0.23702000 | 1.26757900  |
| C | 3.08808200  | -1.11254800 | 2.31136300  |
| C | 2.21844400  | -1.86136000 | 1.38034300  |
| C | 1.01167200  | -2.43652000 | 1.69170700  |
| C | 0.24341600  | -2.99525700 | 0.69828400  |
| C | -1.08088900 | -3.44174600 | 1.17792200  |
| C | -2.16659900 | -3.26349600 | 0.04848000  |
| C | -3.11756300 | -1.99877100 | 0.18636400  |
| C | -1.93678700 | -1.72565400 | -1.84615500 |
| C | -1.59302400 | -3.13107300 | -1.47650500 |
| C | -0.09903300 | -3.42490700 | -1.76313400 |
| C | 0.68838600  | -2.99607000 | -0.59528100 |
| C | 1.89652800  | -2.42619900 | -0.91112300 |
| C | 2.64158000  | -1.82346500 | 0.07434400  |
| C | 3.89100000  | -1.05340500 | -0.09795400 |
| C | 3.90810000  | -0.34288300 | -1.48726800 |
| C | 3.52378000  | 1.20383800  | -1.47250000 |
| C | 2.13942900  | 1.20302000  | -1.98442900 |
| C | 1.21481600  | 2.20831800  | -1.84512100 |
| C | -0.07448200 | 2.00343200  | -2.26100700 |
| C | -0.43470900 | 0.81986900  | -2.84724900 |
| C | -1.80443300 | 0.39822700  | -3.20824600 |
| C | -1.61904600 | -1.17368900 | -3.18850100 |
| C | -0.10304000 | -1.41902800 | -3.54584700 |
| C | 0.64466600  | -2.67383400 | -2.97240900 |
| C | 2.15397400  | -2.35426800 | -2.36439800 |
| C | 2.86737700  | -0.98815700 | -2.59905700 |
| C | 1.79513900  | 0.02961800  | -2.61026700 |
| C | 0.50195000  | -0.17041300 | -3.02776000 |
| C | -3.00881900 | 0.92034200  | 0.15878900  |
| C | -2.37472400 | 2.06580900  | -0.06240600 |
| C | -1.99529200 | 3.04148300  | 0.98810000  |

|   |             |             |             |
|---|-------------|-------------|-------------|
| C | -0.61025900 | 3.72543800  | 0.68065900  |
| C | 0.31755800  | 2.84160800  | 1.42806600  |
| C | 1.63389100  | 2.56959400  | 1.12467200  |
| C | 2.28386100  | 1.53506900  | 1.75318800  |
| C | 1.64956900  | 0.82098400  | 2.74405600  |
| C | 2.14954300  | -0.43577200 | 3.35040500  |
| C | 0.74194800  | -1.15981100 | 3.82057500  |
| C | 0.31942400  | -2.42914400 | 2.99887900  |
| C | -1.17695000 | -2.63683700 | 2.52854300  |
| C | -1.84947800 | -1.33219300 | 2.30145700  |
| C | -3.12777600 | -1.23976200 | 1.53887200  |
| C | -3.37958300 | 0.31650200  | 1.47458300  |
| C | -2.52897000 | 0.92101700  | 2.63961000  |
| C | -1.81514500 | 2.31644900  | 2.37448600  |
| C | -0.33469400 | 2.11229400  | 2.39777300  |
| C | 0.34591900  | 1.11445000  | 3.06670800  |
| C | -0.33128200 | 0.00824200  | 3.78541700  |
| C | -1.54258800 | -0.20603300 | 2.93312300  |
| F | -4.71041300 | 0.02029800  | -1.21688700 |
| F | -3.91078800 | 1.45210900  | -3.02489400 |
| F | -3.29048000 | 3.43176000  | -1.70260100 |
| F | -1.19247300 | 3.90427700  | -2.97212200 |
| F | -0.28119400 | 5.22214000  | -1.10343400 |
| F | 1.92273800  | 4.43323000  | -1.93772000 |
| F | 2.99679300  | 4.33673100  | 0.42668400  |
| F | 4.78560800  | 2.75978500  | -0.25435500 |
| F | 4.52260000  | 1.93047700  | 2.01730000  |
| F | 5.28435900  | -0.31720100 | 1.67413600  |
| F | 3.93107700  | -1.95362900 | 2.96567700  |
| F | -1.02313300 | -4.76693100 | 1.48926800  |
| F | -2.94513700 | -4.36084500 | 0.08360300  |
| F | -4.39368500 | -2.42438000 | -0.03869400 |
| F | -2.33075000 | -3.96227800 | -2.26186500 |
| F | 0.04213900  | -4.76412900 | -1.96110300 |
| F | 4.92646600  | -1.94473000 | -0.10043400 |
| F | 5.15419400  | -0.44703000 | -1.98094700 |
| F | 4.31275000  | 1.80251400  | -2.41305000 |
| F | -2.08145000 | 0.75965300  | -4.49164200 |
| F | -2.41620000 | -1.77394200 | -4.10533600 |
| F | 0.00524800  | -1.45141600 | -4.90318900 |
| F | 0.78911700  | -3.55627900 | -3.97404400 |
| F | 2.95941100  | -3.36391400 | -2.77884100 |
| F | 3.53223500  | -1.02108400 | -3.78089800 |
| F | -2.95678300 | 3.99143700  | 1.05656300  |



|    |                                 |             |                          |
|----|---------------------------------|-------------|--------------------------|
| F  | -0.62762100                     | 4.95435500  | 1.26987500               |
| F  | 2.85677800                      | -0.17968100 | 4.48039700               |
| F  | 0.89081100                      | -1.53493000 | 5.10311000               |
| F  | 0.67990900                      | -3.52956700 | 3.71551900               |
| F  | -1.87671600                     | -3.34398000 | 3.44957700               |
| F  | -4.10384500                     | -1.79726600 | 2.31122000               |
| F  | -4.69654200                     | 0.54994500  | 1.69536800               |
| F  | -3.33896300                     | 1.06339600  | 3.71910200               |
| F  | -2.19946400                     | 3.18219100  | 3.34704100               |
| F  | -0.70477500                     | 0.33745700  | 5.05256400               |
| H  | -5.52376000                     | 2.92000700  | -1.04286500              |
| O  | -5.42703500                     | 2.53118500  | -0.16432400              |
| H  | -6.11104200                     | 1.85094400  | -0.12746900              |
| TS | imaginary vibrational frequency |             | -810.03 cm <sup>-1</sup> |
| C  | -2.75701200                     | -0.90967700 | -1.02122400              |
| C  | -3.40074000                     | 0.42264200  | -1.24789900              |
| C  | -2.70476300                     | 1.27059800  | -2.38428200              |
| C  | -2.09534400                     | 2.51409900  | -1.58271700              |
| C  | -0.74591900                     | 3.11305600  | -1.98745500              |
| C  | 0.09564900                      | 3.89853000  | -0.87728600              |
| C  | 1.63754000                      | 3.38024900  | -1.12791700              |
| C  | 2.58732500                      | 3.04176700  | 0.05013800               |
| C  | 3.73811700                      | 1.86902000  | -0.09780800              |
| C  | 3.65869900                      | 1.09976700  | 1.29209600               |
| C  | 3.93471700                      | -0.43857800 | 1.38633200               |
| C  | 2.94186200                      | -1.24525400 | 2.41300900               |
| C  | 2.05845900                      | -1.96061900 | 1.46896600               |
| C  | 0.81559100                      | -2.47046800 | 1.75295900               |
| C  | 0.04287700                      | -2.98941000 | 0.74140200               |
| C  | -1.32419900                     | -3.33861800 | 1.17863600               |
| C  | -2.36131800                     | -3.09221700 | 0.01402600               |
| C  | -3.22697700                     | -1.76828600 | 0.10924000               |
| C  | -1.97818300                     | -1.57157900 | -1.86816300              |
| C  | -1.73871000                     | -2.99831100 | -1.48424000              |
| C  | -0.26392800                     | -3.40655000 | -1.72541600              |
| C  | 0.52017700                      | -3.02455700 | -0.53977400              |
| C  | 1.76608500                      | -2.52723700 | -0.82556800              |
| C  | 2.51813500                      | -1.96052800 | 0.17550600               |
| C  | 3.81517600                      | -1.26807200 | 0.02918300               |
| C  | 3.91854900                      | -0.58337200 | -1.37004700              |
| C  | 3.63067000                      | 0.98310700  | -1.38927300              |
| C  | 2.27336200                      | 1.06100700  | -1.96214000              |
| C  | 1.40932600                      | 2.12300400  | -1.87004800              |
| C  | 0.13363500                      | 1.99698800  | -2.34987500              |

|   |             |             |             |
|---|-------------|-------------|-------------|
| C | -0.28627600 | 0.82899000  | -2.92749500 |
| C | -1.67950000 | 0.47400500  | -3.28798900 |
| C | -1.58936400 | -1.09313700 | -3.21982800 |
| C | -0.08581100 | -1.44661500 | -3.54120500 |
| C | 0.56572700  | -2.73032300 | -2.92102700 |
| C | 2.07075600  | -2.49415100 | -2.27106600 |
| C | 2.87842400  | -1.18342000 | -2.50839900 |
| C | 1.87892100  | -0.09784100 | -2.58640600 |
| C | 0.58993400  | -0.22338300 | -3.05042800 |
| C | -3.30297200 | 1.25466200  | 0.03829800  |
| C | -2.07035400 | 2.01520400  | -0.17811100 |
| C | -1.75253800 | 2.94530900  | 0.80952200  |
| C | -0.44915800 | 3.75062100  | 0.58948100  |
| C | 0.44721300  | 2.89075700  | 1.42940600  |
| C | 1.74554900  | 2.51819900  | 1.15193600  |
| C | 2.31391300  | 1.44781300  | 1.80749500  |
| C | 1.61911600  | 0.78627000  | 2.79200900  |
| C | 2.01772100  | -0.49858600 | 3.41450400  |
| C | 0.55627300  | -1.13189800 | 3.84657500  |
| C | 0.08099800  | -2.39147800 | 3.03470000  |
| C | -1.40649300 | -2.50958600 | 2.51049900  |
| C | -1.97394100 | -1.16898000 | 2.23124100  |
| C | -3.23158600 | -1.03185400 | 1.45122200  |
| C | -3.48123800 | 0.52704800  | 1.40405400  |
| C | -2.54502200 | 1.10858700  | 2.54390200  |
| C | -1.74358100 | 2.43411800  | 2.25798900  |
| C | -0.26816200 | 2.20028700  | 2.39238600  |
| C | 0.32781300  | 1.16628300  | 3.08113500  |
| C | -0.44312600 | 0.09822400  | 3.76457100  |
| C | -1.62755600 | -0.05808400 | 2.86224500  |
| F | -4.70432200 | 0.19439000  | -1.57760800 |
| F | -3.68476800 | 1.71233100  | -3.19955500 |
| F | -3.00279400 | 3.54704800  | -1.75722600 |
| F | -0.91305900 | 3.94376400  | -3.05506600 |
| F | 0.05914600  | 5.20868300  | -1.18165600 |
| F | 2.23623900  | 4.30391800  | -1.92616400 |
| F | 3.23198500  | 4.17203400  | 0.44162800  |
| F | 4.93489000  | 2.48324900  | -0.14711700 |
| F | 4.56513400  | 1.70562800  | 2.11819900  |
| F | 5.19552700  | -0.58663600 | 1.83268700  |
| F | 3.71666000  | -2.12063700 | 3.10568300  |
| F | -1.37322700 | -4.66095900 | 1.50244700  |
| F | -3.21486000 | -4.13383200 | 0.03150800  |
| F | -4.52381700 | -2.10186500 | -0.16022900 |

|    |             |             |             |
|----|-------------|-------------|-------------|
| F  | -2.51175700 | -3.77534300 | -2.29101000 |
| F  | -0.22493300 | -4.75577200 | -1.90254500 |
| F  | 4.79427300  | -2.22069800 | 0.07565500  |
| F  | 5.17191400  | -0.77267000 | -1.81935700 |
| F  | 4.49546300  | 1.51922600  | -2.30161900 |
| F  | -1.92193400 | 0.80939900  | -4.58597100 |
| F  | -2.40798200 | -1.67293600 | -4.13264900 |
| F  | 0.03728000  | -1.52872700 | -4.89564600 |
| F  | 0.68363400  | -3.64260000 | -3.89973500 |
| F  | 2.82162400  | -3.56275400 | -2.64025900 |
| F  | 3.58541800  | -1.29233200 | -3.66170500 |
| F  | -3.07611900 | 4.02995200  | 0.88648400  |
| F  | -0.55655900 | 4.98808600  | 1.14173100  |
| F  | 2.70533900  | -0.28351400 | 4.56579300  |
| F  | 0.64520300  | -1.49449700 | 5.13864000  |
| F  | 0.33778000  | -3.49680100 | 3.78790200  |
| F  | -2.19692700 | -3.13973000 | 3.41391500  |
| F  | -4.21391300 | -1.60135800 | 2.21332000  |
| F  | -4.78518900 | 0.70563500  | 1.78646900  |
| F  | -3.32421400 | 1.32897200  | 3.63632300  |
| F  | -2.15910800 | 3.38860400  | 3.12866400  |
| F  | -0.85574400 | 0.44495900  | 5.01549100  |
| O  | -4.41088000 | 2.29380700  | -0.00334700 |
| H  | -3.93362800 | 3.23521500  | 0.42322100  |
| H  | -5.20311500 | 1.98911700  | 0.48729900  |
| IP |             |             |             |
| C  | 2.90449500  | 0.16775600  | 0.96119000  |
| C  | 3.40020200  | 1.39129500  | 0.26767300  |
| C  | 2.68075800  | 2.72855700  | 0.70522300  |
| C  | 1.92238700  | 3.24125500  | -0.63689800 |
| C  | 0.45979000  | 3.75479700  | -0.53804000 |
| C  | -0.55703200 | 3.59695400  | -1.77055600 |
| C  | -1.98356000 | 3.22867300  | -1.06632000 |
| C  | -2.95334300 | 2.17425300  | -1.67031300 |
| C  | -3.91888800 | 1.26680000  | -0.68369900 |
| C  | -3.81324100 | -0.19527900 | -1.30490200 |
| C  | -3.87409500 | -1.46714300 | -0.39214700 |
| C  | -2.82674100 | -2.65355600 | -0.81249200 |
| C  | -1.81175200 | -2.54532300 | 0.25574000  |
| C  | -0.52982800 | -3.03032000 | 0.20090900  |
| C  | 0.35074700  | -2.75244800 | 1.21973500  |
| C  | 1.72890600  | -3.19678900 | 0.92502300  |
| C  | 2.77801000  | -2.20006500 | 1.55203300  |
| C  | 3.44814200  | -1.16514500 | 0.55650600  |

|   |             |             |             |
|---|-------------|-------------|-------------|
| C | 2.27817000  | 0.12531300  | 2.12972000  |
| C | 2.22156500  | -1.23982500 | 2.74017300  |
| C | 0.82844200  | -1.51390000 | 3.36203300  |
| C | -0.05647500 | -2.01482200 | 2.29761000  |
| C | -1.34355400 | -1.54349800 | 2.36571500  |
| C | -2.20912500 | -1.78006000 | 1.32375100  |
| C | -3.57931100 | -1.24981000 | 1.16369600  |
| C | -3.70199200 | 0.15036800  | 1.84041300  |
| C | -3.61738900 | 1.39399300  | 0.85035500  |
| C | -2.24765500 | 1.89258000  | 1.07217100  |
| C | -1.53249900 | 2.70850400  | 0.23676700  |
| C | -0.22437900 | 3.00137800  | 0.52229000  |
| C | 0.36454600  | 2.50146200  | 1.65012100  |
| C | 1.79727700  | 2.58728700  | 2.00604400  |
| C | 1.91085700  | 1.32023400  | 2.93545300  |
| C | 0.48268900  | 1.13580100  | 3.58037700  |
| C | -0.02114000 | -0.29788000 | 3.97350900  |
| C | -1.57790200 | -0.63247600 | 3.50526300  |
| C | -2.53578400 | 0.47464000  | 2.97093900  |
| C | -1.67722900 | 1.42289700  | 2.23029800  |
| C | -0.36372700 | 1.71192500  | 2.51080800  |
| C | 3.29828200  | 1.29191500  | -1.27938200 |
| C | 2.04191500  | 2.06285500  | -1.55287100 |
| C | 1.24303400  | 1.87088300  | -2.58505900 |
| C | -0.07023700 | 2.58345500  | -2.84798400 |
| C | -0.91783600 | 1.35230500  | -2.96170300 |
| C | -2.13057600 | 1.13842700  | -2.34449700 |
| C | -2.56942300 | -0.14819100 | -2.11234600 |
| C | -1.83191300 | -1.22282800 | -2.55104400 |
| C | -2.06664800 | -2.63727200 | -2.16790900 |
| C | -0.55346800 | -3.27962600 | -2.28769400 |
| C | 0.12250900  | -3.71487100 | -0.93607600 |
| C | 1.63554000  | -3.37243600 | -0.63422000 |
| C | 2.03175000  | -2.10847300 | -1.30126800 |
| C | 3.30597100  | -1.42859200 | -0.94270600 |
| C | 3.37034800  | -0.16798800 | -1.91004400 |
| C | 2.25926300  | -0.48681000 | -3.00903000 |
| C | 1.31182500  | 0.66116100  | -3.47904100 |
| C | -0.14542300 | 0.26958800  | -3.37394700 |
| C | -0.61994500 | -1.00993200 | -3.17700200 |
| C | 0.27429300  | -2.19437900 | -3.09582200 |
| C | 1.49003000  | -1.64640800 | -2.41563700 |
| F | 4.72520300  | 1.49334100  | 0.60473400  |
| F | 3.64731000  | 3.62569900  | 0.98161700  |

|   |             |             |             |
|---|-------------|-------------|-------------|
| F | 2.66134000  | 4.26518300  | -1.14189100 |
| F | 0.50132800  | 5.07592200  | -0.20867800 |
| F | -0.68850800 | 4.79705000  | -2.36074500 |
| F | -2.65820900 | 4.39792200  | -0.90189100 |
| F | -3.77292000 | 2.78891800  | -2.56105900 |
| F | -5.18452000 | 1.68696600  | -0.86526900 |
| F | -4.84635200 | -0.30999600 | -2.19276700 |
| F | -5.12009300 | -1.96467100 | -0.49527900 |
| F | -3.50068700 | -3.82925800 | -0.70896500 |
| F | 1.93983000  | -4.42437600 | 1.47505300  |
| F | 3.76249100  | -2.95561300 | 2.07429000  |
| F | 4.78658000  | -1.14782200 | 0.82923200  |
| F | 3.13437100  | -1.27524800 | 3.74932000  |
| F | 0.97608900  | -2.45129000 | 4.33671900  |
| F | -4.42546300 | -2.08629800 | 1.83504500  |
| F | -4.89491000 | 0.19913800  | 2.45725800  |
| F | -4.47981100 | 2.33325000  | 1.34146300  |
| F | 2.01689500  | 3.68837600  | 2.77671400  |
| F | 2.84239100  | 1.49761400  | 3.90202600  |
| F | 0.42296500  | 1.91753700  | 4.69333300  |
| F | 0.03245600  | -0.39495800 | 5.31174000  |
| F | -2.16544800 | -1.27779500 | 4.54380100  |
| F | -3.16201100 | 1.07635100  | 4.01253100  |
| F | 0.00461500  | 3.22108000  | -4.05378000 |
| F | -2.83124300 | -3.26121900 | -3.10106100 |
| F | -0.64619300 | -4.37413600 | -3.06459300 |
| F | -0.02707400 | -5.06259900 | -0.80963000 |
| F | 2.45025500  | -4.37233300 | -1.04850200 |
| F | 4.30745500  | -2.29551500 | -1.28389500 |
| F | 4.57769000  | -0.23543700 | -2.52166400 |
| F | 2.88896900  | -0.96256800 | -4.11781600 |
| F | 1.65286700  | 1.04106500  | -4.74260100 |
| F | 0.63326800  | -2.68633500 | -4.31377600 |
| O | 4.28939200  | 2.09043500  | -1.84410100 |
| H | 5.15874000  | 1.76800900  | -1.55168700 |

C<sub>1</sub>-S<sub>N</sub>2'-C41-F<sub>r</sub>

RC

|   |             |             |             |
|---|-------------|-------------|-------------|
| C | -2.73717700 | -1.13338500 | -0.97565000 |
| C | -3.36120800 | 0.20770100  | -1.10130700 |
| C | -2.84588600 | 1.11413300  | -2.26937300 |
| C | -2.35034100 | 2.46335200  | -1.50814900 |
| C | -0.99408700 | 3.09000700  | -1.89929600 |
| C | -0.15522600 | 3.91647400  | -0.81146600 |
| C | 1.40483000  | 3.48071500  | -1.12075000 |

|   |             |             |             |
|---|-------------|-------------|-------------|
| C | 2.41310700  | 3.17929000  | 0.02155900  |
| C | 3.62844900  | 2.07842500  | -0.17628600 |
| C | 3.63523900  | 1.28450700  | 1.20337600  |
| C | 4.00411100  | -0.23601100 | 1.26841300  |
| C | 3.08773200  | -1.11115600 | 2.31244500  |
| C | 2.21850800  | -1.86076700 | 1.38170300  |
| C | 1.01185500  | -2.43614500 | 1.69317500  |
| C | 0.24378600  | -2.99545300 | 0.69985800  |
| C | -1.08075600 | -3.44137200 | 1.17939500  |
| C | -2.16622100 | -3.26364700 | 0.04954400  |
| C | -3.11741400 | -1.99901200 | 0.18658800  |
| C | -1.93618800 | -1.72663300 | -1.84570900 |
| C | -1.59232200 | -3.13180300 | -1.47531300 |
| C | -0.09829600 | -3.42583600 | -1.76148700 |
| C | 0.68895400  | -2.99666400 | -0.59365100 |
| C | 1.89706100  | -2.42672400 | -0.90954100 |
| C | 2.64185500  | -1.82341100 | 0.07574400  |
| C | 3.89112300  | -1.05309800 | -0.09672100 |
| C | 3.90837000  | -0.34324000 | -1.48636200 |
| C | 3.52379700  | 1.20340700  | -1.47234900 |
| C | 2.13949600  | 1.20208300  | -1.98437200 |
| C | 1.21479300  | 2.20741300  | -1.84595200 |
| C | -0.07431600 | 2.00242300  | -2.26238900 |
| C | -0.43417900 | 0.81850100  | -2.84819800 |
| C | -1.80376400 | 0.39633100  | -3.20903600 |
| C | -1.61820400 | -1.17548200 | -3.18829700 |
| C | -0.10213600 | -1.42089000 | -3.54527800 |
| C | 0.64565700  | -2.67527000 | -2.97094100 |
| C | 2.15469300  | -2.35528400 | -2.36280300 |
| C | 2.86791700  | -0.98918700 | -2.59799100 |
| C | 1.79556500  | 0.02842400  | -2.60986700 |
| C | 0.50258100  | -0.17186500 | -3.02782800 |
| C | -3.00910100 | 0.92018800  | 0.15769700  |
| C | -2.37486400 | 2.06558900  | -0.06396200 |
| C | -1.99571400 | 3.04183100  | 0.98611800  |
| C | -0.61066200 | 3.72579300  | 0.67857100  |
| C | 0.31710100  | 2.84252100  | 1.42672200  |
| C | 1.63355700  | 2.57055800  | 1.12377100  |
| C | 2.28350100  | 1.53637100  | 1.75292200  |
| C | 1.64900500  | 0.82259300  | 2.74385200  |
| C | 2.14894000  | -0.43384600 | 3.35083500  |
| C | 0.74147100  | -1.15778700 | 3.82109500  |
| C | 0.31914900  | -2.42772300 | 3.00012200  |
| C | -1.17701800 | -2.63545900 | 2.52934000  |

|   |             |             |             |
|---|-------------|-------------|-------------|
| C | -1.84926400 | -1.33097400 | 2.30114300  |
| C | -3.12757600 | -1.23929800 | 1.53860700  |
| C | -3.37999100 | 0.31681600  | 1.47380300  |
| C | -2.52940800 | 0.92207700  | 2.63855600  |
| C | -1.81575200 | 2.31751600  | 2.37291000  |
| C | -0.33527300 | 2.11365000  | 2.39670700  |
| C | 0.34531700  | 1.11619200  | 3.06627400  |
| C | -0.33189400 | 0.01011300  | 3.78520800  |
| C | -1.54284500 | -0.20457900 | 2.93257600  |
| F | -4.71048300 | 0.02021900  | -1.21769800 |
| F | -3.91007900 | 1.44996300  | -3.02684500 |
| F | -3.29110400 | 3.42994900  | -1.70497700 |
| F | -1.19271400 | 3.90294000  | -2.97428200 |
| F | -0.28130200 | 5.22162700  | -1.10613600 |
| F | 1.92270900  | 4.43213000  | -1.93986400 |
| F | 2.99632900  | 4.33737700  | 0.42478500  |
| F | 4.78540900  | 2.76009800  | -0.25490200 |
| F | 4.52213500  | 1.93197500  | 2.01709700  |
| F | 5.28402300  | -0.31596900 | 1.67524900  |
| F | 3.93067800  | -1.95167500 | 2.96752600  |
| F | -1.02342300 | -4.76634000 | 1.49171700  |
| F | -2.94466400 | -4.36106000 | 0.08494700  |
| F | -4.39350400 | -2.42485200 | -0.03816300 |
| F | -2.32982100 | -3.96329100 | -2.26060400 |
| F | 0.04273400  | -4.76514900 | -1.95887600 |
| F | 4.92673000  | -1.94426200 | -0.09849800 |
| F | 5.15454200  | -0.44736200 | -1.97985600 |
| F | 4.31259800  | 1.80173000  | -2.41329100 |
| F | -2.08083300 | 0.75701200  | -4.49262100 |
| F | -2.41522500 | -1.77634700 | -4.10491000 |
| F | 0.00636200  | -1.45407900 | -4.90256800 |
| F | 0.79040400  | -3.55826500 | -3.97207500 |
| F | 2.96043700  | -3.36497600 | -2.77663900 |
| F | 3.53289100  | -1.02256100 | -3.77974200 |
| F | -2.95727600 | 3.99165900  | 1.05399800  |
| F | -0.62834200 | 4.95502400  | 1.26708700  |
| F | 2.85603200  | -0.17697500 | 4.48077100  |
| F | 0.89021700  | -1.53222000 | 5.10385800  |
| F | 0.67916700  | -3.52767500 | 3.71772000  |
| F | -1.87749500 | -3.34163700 | 3.45062100  |
| F | -4.10317400 | -1.79708500 | 2.31145000  |
| F | -4.69687700 | 0.54971200  | 1.69495700  |
| F | -3.33940400 | 1.06481000  | 3.71798400  |
| F | -2.20042200 | 3.18373400  | 3.34489800  |

|    |                                 |             |                          |
|----|---------------------------------|-------------|--------------------------|
| F  | -0.70582800                     | 0.33966600  | 5.05214400               |
| H  | -5.51884800                     | 2.91661200  | -1.04207100              |
| O  | -5.42924400                     | 2.53176600  | -0.16108600              |
| H  | -6.11266700                     | 1.85071700  | -0.12742800              |
| TS | imaginary vibrational frequency |             | -827.96 cm <sup>-1</sup> |
| C  | -2.79704400                     | -1.17344100 | -1.02674600              |
| C  | -3.10365900                     | 0.24592800  | -1.04970300              |
| C  | -2.81514700                     | 1.09954800  | -2.28316700              |
| C  | -2.42422400                     | 2.53328000  | -1.59485100              |
| C  | -0.99647500                     | 3.07814400  | -1.89200500              |
| C  | -0.18115500                     | 3.90736500  | -0.81527200              |
| C  | 1.38708800                      | 3.47598400  | -1.11151700              |
| C  | 2.38040900                      | 3.16988700  | 0.03715400               |
| C  | 3.60391700                      | 2.07425200  | -0.15117600              |
| C  | 3.59438900                      | 1.27789100  | 1.22611200               |
| C  | 3.96983400                      | -0.24121200 | 1.29453600               |
| C  | 3.04906300                      | -1.11917700 | 2.33192500               |
| C  | 2.18601600                      | -1.86908400 | 1.39483300               |
| C  | 0.97785800                      | -2.44622800 | 1.69696000               |
| C  | 0.21128200                      | -2.99659800 | 0.69624700               |
| C  | -1.11219900                     | -3.45585400 | 1.16419100               |
| C  | -2.19940600                     | -3.28247700 | 0.02508300               |
| C  | -3.14680700                     | -2.01713500 | 0.15787300               |
| C  | -2.00165700                     | -1.77737700 | -1.90500600              |
| C  | -1.62525300                     | -3.16747700 | -1.50808800              |
| C  | -0.11348400                     | -3.43000400 | -1.76730500              |
| C  | 0.65963200                      | -2.98813500 | -0.59470000              |
| C  | 1.87446300                      | -2.42590900 | -0.89958200              |
| C  | 2.61602600                      | -1.82771300 | 0.09130300               |
| C  | 3.86849000                      | -1.05955000 | -0.06988500              |
| C  | 3.90131600                      | -0.35026600 | -1.45866000              |
| C  | 3.51674100                      | 1.19849600  | -1.44929700              |
| C  | 2.13618000                      | 1.19498000  | -1.97012700              |
| C  | 1.20439200                      | 2.19394800  | -1.82309500              |
| C  | -0.08651200                     | 1.97078800  | -2.21663800              |
| C  | -0.42783300                     | 0.79441900  | -2.82173400              |
| C  | -1.78294300                     | 0.38952000  | -3.21757300              |
| C  | -1.62714800                     | -1.19043400 | -3.22027700              |
| C  | -0.09694000                     | -1.43245000 | -3.54570000              |
| C  | 0.64296100                      | -2.68593100 | -2.96990300              |
| C  | 2.14926900                      | -2.36319900 | -2.34936500              |
| C  | 2.87093000                      | -0.99821800 | -2.57892400              |
| C  | 1.79939900                      | 0.01868400  | -2.59519500              |
| C  | 0.50743100                      | -0.19023400 | -3.01041000              |



|   |             |             |             |
|---|-------------|-------------|-------------|
| C | -2.68719900 | 0.86326300  | 0.13011500  |
| C | -2.78320000 | 2.29740000  | -0.09429300 |
| C | -2.11682200 | 3.13958200  | 1.00602100  |
| C | -0.65570200 | 3.70626000  | 0.65630400  |
| C | 0.24945900  | 2.78735200  | 1.38233800  |
| C | 1.57903400  | 2.54054300  | 1.11008000  |
| C | 2.23155400  | 1.51735300  | 1.75155200  |
| C | 1.59254800  | 0.80354800  | 2.73879400  |
| C | 2.10125000  | -0.44249400 | 3.36123900  |
| C | 0.70032500  | -1.17454100 | 3.83044500  |
| C | 0.28430400  | -2.44869100 | 3.00328600  |
| C | -1.20866200 | -2.66341500 | 2.52530900  |
| C | -1.86732100 | -1.35722700 | 2.29766700  |
| C | -3.11985600 | -1.23785800 | 1.49868300  |
| C | -3.26962500 | 0.30436000  | 1.38965600  |
| C | -2.55196900 | 0.89063000  | 2.61586600  |
| C | -1.87499300 | 2.29797700  | 2.36498200  |
| C | -0.40048300 | 2.07391000  | 2.35599900  |
| C | 0.28629500  | 1.09182600  | 3.05058900  |
| C | -0.37391300 | -0.00955600 | 3.79510800  |
| C | -1.57531500 | -0.23544300 | 2.94593200  |
| F | -4.84413300 | 0.44219900  | -1.00184500 |
| F | -3.91423300 | 1.31955800  | -3.03344500 |
| F | -3.28382100 | 3.47868400  | -2.08363400 |
| F | -1.10049300 | 3.86650500  | -3.00465600 |
| F | -0.31763400 | 5.21237600  | -1.11210800 |
| F | 1.90517200  | 4.42661000  | -1.92975700 |
| F | 2.95344800  | 4.32330600  | 0.46806300  |
| F | 4.75863800  | 2.76077000  | -0.21507400 |
| F | 4.46469700  | 1.92833000  | 2.05555600  |
| F | 5.24770200  | -0.31467900 | 1.71001300  |
| F | 3.89024100  | -1.95646000 | 2.99382300  |
| F | -1.04379600 | -4.78436300 | 1.46272700  |
| F | -2.97939400 | -4.37935800 | 0.07063300  |
| F | -4.43163100 | -2.42975700 | -0.03842900 |
| F | -2.31991000 | -4.05274800 | -2.27458400 |
| F | 0.05437200  | -4.76984200 | -1.94913600 |
| F | 4.90373400  | -1.95163000 | -0.06043000 |
| F | 5.15249400  | -0.45384900 | -1.93959200 |
| F | 4.31653000  | 1.79703100  | -2.38045900 |
| F | -2.02821600 | 0.77981000  | -4.49963800 |
| F | -2.39207600 | -1.74758700 | -4.19061900 |
| F | 0.03831300  | -1.45408600 | -4.90144100 |
| F | 0.79552200  | -3.56955100 | -3.96956900 |

|    |             |             |             |
|----|-------------|-------------|-------------|
| F  | 2.95710700  | -3.37675300 | -2.75004800 |
| F  | 3.54593300  | -1.03180000 | -3.75504900 |
| F  | -2.90944300 | 4.20357300  | 1.27034000  |
| F  | -0.57948300 | 4.92632000  | 1.26565700  |
| F  | 2.80080000  | -0.16733300 | 4.49218500  |
| F  | 0.85010200  | -1.55238100 | 5.11248700  |
| F  | 0.65448100  | -3.54668200 | 3.71930200  |
| F  | -1.91409200 | -3.37566200 | 3.43894000  |
| F  | -4.13377100 | -1.73103900 | 2.27129500  |
| F  | -4.60603700 | 0.60191700  | 1.51875200  |
| F  | -3.42269600 | 1.01420100  | 3.65111600  |
| F  | -2.21583700 | 3.12112400  | 3.39162300  |
| F  | -0.73845100 | 0.33668500  | 5.06074600  |
| H  | -4.52669700 | 3.38290700  | -0.55898000 |
| O  | -4.29979900 | 2.58034600  | -0.04375200 |
| H  | -4.75559700 | 1.65463200  | -0.48064600 |
| IP |             |             |             |
| C  | -2.58059300 | -1.08619300 | -1.18385100 |
| C  | -2.69426600 | 0.32093700  | -1.30064200 |
| C  | -2.48634800 | 1.03952800  | -2.58474800 |
| C  | -2.19527700 | 2.54436800  | -2.06773900 |
| C  | -0.70170300 | 3.00297700  | -2.22998900 |
| C  | 0.04375800  | 3.85484000  | -1.11851600 |
| C  | 1.60848100  | 3.33547600  | -1.20722400 |
| C  | 2.44985400  | 3.05557300  | 0.06517300  |
| C  | 3.63022400  | 1.90400000  | 0.08705800  |
| C  | 3.43453200  | 1.20761600  | 1.50916400  |
| C  | 3.71624900  | -0.31722700 | 1.72051600  |
| C  | 2.63884500  | -1.07886700 | 2.70365800  |
| C  | 1.84368800  | -1.84745900 | 1.72361000  |
| C  | 0.58425600  | -2.35466600 | 1.92478700  |
| C  | -0.09058500 | -2.94733400 | 0.88293700  |
| C  | -1.47842900 | -3.31185600 | 1.23134600  |
| C  | -2.41653700 | -3.17623100 | -0.02508500 |
| C  | -3.24012200 | -1.83621400 | -0.08449700 |
| C  | -1.87948600 | -1.84079700 | -2.02122200 |
| C  | -1.67491800 | -3.22557100 | -1.50636000 |
| C  | -0.15104000 | -3.55184500 | -1.57538800 |
| C  | 0.49825000  | -3.05386700 | -0.34863200 |
| C  | 1.75941200  | -2.54991800 | -0.55062200 |
| C  | 2.41479300  | -1.91595800 | 0.47756000  |
| C  | 3.71677800  | -1.22016000 | 0.40642200  |
| C  | 3.93942800  | -0.61082900 | -1.01523300 |
| C  | 3.64083700  | 0.94972400  | -1.15541000 |

|   |             |             |             |
|---|-------------|-------------|-------------|
| C | 2.33322900  | 0.97854200  | -1.84332400 |
| C | 1.44051500  | 2.02431800  | -1.86802800 |
| C | 0.19346800  | 1.83974300  | -2.40638800 |
| C | -0.12521500 | 0.64295600  | -2.99286900 |
| C | -1.46969800 | 0.25759400  | -3.45382400 |
| C | -1.36913700 | -1.33795100 | -3.32913100 |
| C | 0.16589600  | -1.66038900 | -3.47805100 |
| C | 0.76873100  | -2.90349300 | -2.73093200 |
| C | 2.20106000  | -2.60088600 | -1.95939200 |
| C | 3.01170100  | -1.28996800 | -2.20170700 |
| C | 2.01100300  | -0.22453300 | -2.42460900 |
| C | 0.77118400  | -0.39887700 | -2.98815100 |
| C | -2.96316700 | 1.09552800  | -0.25951800 |
| C | -2.84498200 | 2.54908600  | -0.59594900 |
| C | -2.10136300 | 3.33659400  | 0.53772800  |
| C | -0.58412800 | 3.77039500  | 0.30267100  |
| C | 0.16690300  | 2.83204000  | 1.15870700  |
| C | 1.50563900  | 2.52322700  | 1.07036600  |
| C | 2.03498300  | 1.53718400  | 1.86136400  |
| C | 1.25357300  | 0.92630600  | 2.81721500  |
| C | 1.62028800  | -0.29159700 | 3.57771600  |
| C | 0.13348200  | -0.92149900 | 3.92543400  |
| C | -0.25214400 | -2.22817500 | 3.13990300  |
| C | -1.69348600 | -2.40908500 | 2.51195600  |
| C | -2.27273200 | -1.09370800 | 2.13619000  |
| C | -3.41812300 | -0.99153600 | 1.19294300  |
| C | -3.56530100 | 0.56793100  | 1.00248300  |
| C | -2.87649700 | 1.20815200  | 2.23576700  |
| C | -2.07005900 | 2.55129900  | 1.95347500  |
| C | -0.62284800 | 2.22797500  | 2.09887900  |
| C | -0.06612300 | 1.28483100  | 2.94289200  |
| C | -0.86894200 | 0.28626100  | 3.68750400  |
| C | -1.99418500 | 0.05953000  | 2.73283000  |
| F | -3.67667800 | 1.06354800  | -3.24620500 |
| F | -2.93376200 | 3.39888600  | -2.81108900 |
| F | -0.63643800 | 3.73549000  | -3.38268700 |
| F | 0.01334900  | 5.14542500  | -1.49956500 |
| F | 2.26582700  | 4.21035100  | -2.00999000 |
| F | 3.02286800  | 4.20725500  | 0.49953100  |
| F | 4.81664300  | 2.53646700  | 0.11034300  |
| F | 4.24448000  | 1.87748800  | 2.38207600  |
| F | 4.93347200  | -0.42581700 | 2.28161700  |
| F | 3.35826700  | -1.90842300 | 3.50234200  |
| F | -1.51999400 | -4.61320900 | 1.63306700  |

|   |             |             |             |
|---|-------------|-------------|-------------|
| F | -3.28549600 | -4.20276100 | 0.01655700  |
| F | -4.49357800 | -2.13278500 | -0.54213300 |
| F | -2.33243300 | -4.13995400 | -2.26182500 |
| F | -0.00724100 | -4.90245900 | -1.65998700 |
| F | 4.69228900  | -2.15939000 | 0.58774700  |
| F | 5.22971600  | -0.80694600 | -1.33872500 |
| F | 4.57574800  | 1.44390100  | -2.01943700 |
| F | -1.66228900 | 0.56216500  | -4.76422900 |
| F | -2.06051500 | -1.93621500 | -4.32856800 |
| F | 0.43419800  | -1.80240000 | -4.80574100 |
| F | 0.99075900  | -3.85677100 | -3.65115400 |
| F | 3.00012000  | -3.67416300 | -2.18733200 |
| F | 3.81479600  | -1.44916000 | -3.28393600 |
| F | -2.79500100 | 4.49076600  | 0.71625600  |
| F | -0.44132600 | 5.00987400  | 0.86439200  |
| F | 2.20140600  | 0.02227900  | 4.76307200  |
| F | 0.11532700  | -1.21451100 | 5.23726700  |
| F | -0.02579800 | -3.28704300 | 3.96634800  |
| F | -2.52650300 | -3.03042200 | 3.38157200  |
| F | -4.53384100 | -1.44539100 | 1.83627600  |
| F | -4.88380800 | 0.88824000  | 0.99988500  |
| F | -3.81630500 | 1.46269500  | 3.17899400  |
| F | -2.43276400 | 3.44789300  | 2.90864300  |
| F | -1.34626800 | 0.75144500  | 4.87409800  |
| O | -4.15446300 | 3.00101000  | -0.67793200 |
| H | -4.15899800 | 3.96774400  | -0.77121300 |

C<sub>1</sub>- S<sub>N</sub>2'-C41-F<sub>e</sub>

RC

|   |             |             |             |
|---|-------------|-------------|-------------|
| C | -2.73717700 | -1.13338500 | -0.97565000 |
| C | -3.36120800 | 0.20770100  | -1.10130700 |
| C | -2.84588600 | 1.11413300  | -2.26937300 |
| C | -2.35034100 | 2.46335200  | -1.50814900 |
| C | -0.99408700 | 3.09000700  | -1.89929600 |
| C | -0.15522600 | 3.91647400  | -0.81146600 |
| C | 1.40483000  | 3.48071500  | -1.12075000 |
| C | 2.41310700  | 3.17929000  | 0.02155900  |
| C | 3.62844900  | 2.07842500  | -0.17628600 |
| C | 3.63523900  | 1.28450700  | 1.20337600  |
| C | 4.00411100  | -0.23601100 | 1.26841300  |
| C | 3.08773200  | -1.11115600 | 2.31244500  |
| C | 2.21850800  | -1.86076700 | 1.38170300  |
| C | 1.01185500  | -2.43614500 | 1.69317500  |
| C | 0.24378600  | -2.99545300 | 0.69985800  |
| C | -1.08075600 | -3.44137200 | 1.17939500  |

|   |             |             |             |
|---|-------------|-------------|-------------|
| C | -2.16622100 | -3.26364700 | 0.04954400  |
| C | -3.11741400 | -1.99901200 | 0.18658800  |
| C | -1.93618800 | -1.72663300 | -1.84570900 |
| C | -1.59232200 | -3.13180300 | -1.47531300 |
| C | -0.09829600 | -3.42583600 | -1.76148700 |
| C | 0.68895400  | -2.99666400 | -0.59365100 |
| C | 1.89706100  | -2.42672400 | -0.90954100 |
| C | 2.64185500  | -1.82341100 | 0.07574400  |
| C | 3.89112300  | -1.05309800 | -0.09672100 |
| C | 3.90837000  | -0.34324000 | -1.48636200 |
| C | 3.52379700  | 1.20340700  | -1.47234900 |
| C | 2.13949600  | 1.20208300  | -1.98437200 |
| C | 1.21479300  | 2.20741300  | -1.84595200 |
| C | -0.07431600 | 2.00242300  | -2.26238900 |
| C | -0.43417900 | 0.81850100  | -2.84819800 |
| C | -1.80376400 | 0.39633100  | -3.20903600 |
| C | -1.61820400 | -1.17548200 | -3.18829700 |
| C | -0.10213600 | -1.42089000 | -3.54527800 |
| C | 0.64565700  | -2.67527000 | -2.97094100 |
| C | 2.15469300  | -2.35528400 | -2.36280300 |
| C | 2.86791700  | -0.98918700 | -2.59799100 |
| C | 1.79556500  | 0.02842400  | -2.60986700 |
| C | 0.50258100  | -0.17186500 | -3.02782800 |
| C | -3.00910100 | 0.92018800  | 0.15769700  |
| C | -2.37486400 | 2.06558900  | -0.06396200 |
| C | -1.99571400 | 3.04183100  | 0.98611800  |
| C | -0.61066200 | 3.72579300  | 0.67857100  |
| C | 0.31710100  | 2.84252100  | 1.42672200  |
| C | 1.63355700  | 2.57055800  | 1.12377100  |
| C | 2.28350100  | 1.53637100  | 1.75292200  |
| C | 1.64900500  | 0.82259300  | 2.74385200  |
| C | 2.14894000  | -0.43384600 | 3.35083500  |
| C | 0.74147100  | -1.15778700 | 3.82109500  |
| C | 0.31914900  | -2.42772300 | 3.00012200  |
| C | -1.17701800 | -2.63545900 | 2.52934000  |
| C | -1.84926400 | -1.33097400 | 2.30114300  |
| C | -3.12757600 | -1.23929800 | 1.53860700  |
| C | -3.37999100 | 0.31681600  | 1.47380300  |
| C | -2.52940800 | 0.92207700  | 2.63855600  |
| C | -1.81575200 | 2.31751600  | 2.37291000  |
| C | -0.33527300 | 2.11365000  | 2.39670700  |
| C | 0.34531700  | 1.11619200  | 3.06627400  |
| C | -0.33189400 | 0.01011300  | 3.78520800  |
| C | -1.54284500 | -0.20457900 | 2.93257600  |

|    |                                 |             |                          |
|----|---------------------------------|-------------|--------------------------|
| F  | -4.71048300                     | 0.02021900  | -1.21769800              |
| F  | -3.91007900                     | 1.44996300  | -3.02684500              |
| F  | -3.29110400                     | 3.42994900  | -1.70497700              |
| F  | -1.19271400                     | 3.90294000  | -2.97428200              |
| F  | -0.28130200                     | 5.22162700  | -1.10613600              |
| F  | 1.92270900                      | 4.43213000  | -1.93986400              |
| F  | 2.99632900                      | 4.33737700  | 0.42478500               |
| F  | 4.78540900                      | 2.76009800  | -0.25490200              |
| F  | 4.52213500                      | 1.93197500  | 2.01709700               |
| F  | 5.28402300                      | -0.31596900 | 1.67524900               |
| F  | 3.93067800                      | -1.95167500 | 2.96752600               |
| F  | -1.02342300                     | -4.76634000 | 1.49171700               |
| F  | -2.94466400                     | -4.36106000 | 0.08494700               |
| F  | -4.39350400                     | -2.42485200 | -0.03816300              |
| F  | -2.32982100                     | -3.96329100 | -2.26060400              |
| F  | 0.04273400                      | -4.76514900 | -1.95887600              |
| F  | 4.92673000                      | -1.94426200 | -0.09849800              |
| F  | 5.15454200                      | -0.44736200 | -1.97985600              |
| F  | 4.31259800                      | 1.80173000  | -2.41329100              |
| F  | -2.08083300                     | 0.75701200  | -4.49262100              |
| F  | -2.41522500                     | -1.77634700 | -4.10491000              |
| F  | 0.00636200                      | -1.45407900 | -4.90256800              |
| F  | 0.79040400                      | -3.55826500 | -3.97207500              |
| F  | 2.96043700                      | -3.36497600 | -2.77663900              |
| F  | 3.53289100                      | -1.02256100 | -3.77974200              |
| F  | -2.95727600                     | 3.99165900  | 1.05399800               |
| F  | -0.62834200                     | 4.95502400  | 1.26708700               |
| F  | 2.85603200                      | -0.17697500 | 4.48077100               |
| F  | 0.89021700                      | -1.53222000 | 5.10385800               |
| F  | 0.67916700                      | -3.52767500 | 3.71772000               |
| F  | -1.87749500                     | -3.34163700 | 3.45062100               |
| F  | -4.10317400                     | -1.79708500 | 2.31145000               |
| F  | -4.69687700                     | 0.54971200  | 1.69495700               |
| F  | -3.33940400                     | 1.06481000  | 3.71798400               |
| F  | -2.20042200                     | 3.18373400  | 3.34489800               |
| F  | -0.70582800                     | 0.33966600  | 5.05214400               |
| H  | -5.51884800                     | 2.91661200  | -1.04207100              |
| O  | -5.42924400                     | 2.53176600  | -0.16108600              |
| H  | -6.11266700                     | 1.85071700  | -0.12742800              |
| TS | imaginary vibrational frequency |             | -819.54 cm <sup>-1</sup> |
| C  | -2.73953400                     | -1.26396500 | -0.95193100              |
| C  | -3.24027000                     | 0.10750800  | -1.10580900              |
| C  | -2.84792000                     | 0.90739600  | -2.36533400              |
| C  | -2.46655900                     | 2.39915000  | -1.75965000              |

|   |             |             |             |
|---|-------------|-------------|-------------|
| C | -1.03196700 | 2.92564800  | -2.09638700 |
| C | -0.20120900 | 3.83654300  | -1.09034800 |
| C | 1.36469800  | 3.38875000  | -1.35552800 |
| C | 2.36749400  | 3.17470800  | -0.18825200 |
| C | 3.59292600  | 2.07344900  | -0.29817500 |
| C | 3.59405200  | 1.38011500  | 1.13725800  |
| C | 3.97170100  | -0.12914400 | 1.31673500  |
| C | 3.04962000  | -0.93470900 | 2.41346000  |
| C | 2.18821600  | -1.74849100 | 1.53051100  |
| C | 0.98099100  | -2.30684400 | 1.87191200  |
| C | 0.22520700  | -2.93466000 | 0.91151900  |
| C | -1.09610000 | -3.36514400 | 1.40772000  |
| C | -2.17040800 | -3.28599800 | 0.25732000  |
| C | -3.12011500 | -2.01636000 | 0.28222000  |
| C | -1.95369900 | -1.93165900 | -1.77896000 |
| C | -1.58676600 | -3.28921400 | -1.27927800 |
| C | -0.07824000 | -3.56298000 | -1.51579600 |
| C | 0.68406500  | -3.03063200 | -0.37382800 |
| C | 1.89228900  | -2.47851800 | -0.71710800 |
| C | 2.62411600  | -1.80223600 | 0.22955300  |
| C | 3.87248400  | -1.04061200 | 0.01215500  |
| C | 3.89924100  | -0.43128200 | -1.42571900 |
| C | 3.50282200  | 1.10916900  | -1.52846400 |
| C | 2.12046500  | 1.06008800  | -2.04394400 |
| C | 1.18003600  | 2.05854200  | -1.96830100 |
| C | -0.11239800 | 1.80218600  | -2.34436600 |
| C | -0.44299800 | 0.58321100  | -2.86541800 |
| C | -1.79492500 | 0.14185600  | -3.23739300 |
| C | -1.61105200 | -1.43673200 | -3.13793500 |
| C | -0.08073600 | -1.68602800 | -3.43973100 |
| C | 0.66862600  | -2.89144100 | -2.76895200 |
| C | 2.16765100  | -2.51505400 | -2.16882500 |
| C | 2.87379600  | -1.16423300 | -2.49607400 |
| C | 1.79379100  | -0.15913500 | -2.58496800 |
| C | 0.50397600  | -0.40352400 | -2.98568700 |
| C | -2.69871200 | 0.85331600  | 0.04762000  |
| C | -2.79398800 | 2.27901000  | -0.24240300 |
| C | -2.10298100 | 3.20559400  | 0.78742000  |
| C | -0.65409400 | 3.74657800  | 0.39541100  |
| C | 0.25105600  | 2.88719800  | 1.18811200  |
| C | 1.57935700  | 2.62663100  | 0.93676000  |
| C | 2.23430700  | 1.65533000  | 1.65274500  |
| C | 1.59441700  | 1.00838400  | 2.68598300  |
| C | 2.09895600  | -0.19232700 | 3.39374400  |

|   |             |             |             |
|---|-------------|-------------|-------------|
| C | 0.69269000  | -0.89139700 | 3.90624300  |
| C | 0.27843100  | -2.21821000 | 3.17146000  |
| C | -1.21619400 | -2.47508800 | 2.70412800  |
| C | -1.89251400 | -1.19354400 | 2.39339200  |
| C | -3.13728100 | -1.11945700 | 1.55500000  |
| C | -3.14732400 | 0.40220400  | 1.29357400  |
| C | -2.55680000 | 1.08143500  | 2.51869900  |
| C | -1.86998000 | 2.46086400  | 2.19680300  |
| C | -0.39892100 | 2.23920600  | 2.20653900  |
| C | 0.28338200  | 1.30842000  | 2.96692900  |
| C | -0.38436600 | 0.26412900  | 3.78307100  |
| C | -1.58984500 | -0.02694600 | 2.95445200  |
| F | -4.63872500 | 0.04149400  | -1.09526400 |
| F | -3.94117300 | 1.09351900  | -3.13858900 |
| F | -3.34223900 | 3.29044500  | -2.30772600 |
| F | -1.15008700 | 3.63106800  | -3.26112500 |
| F | -0.34130800 | 5.11472900  | -1.48554500 |
| F | 1.88283900  | 4.27438800  | -2.24391300 |
| F | 2.93676800  | 4.36092000  | 0.14765500  |
| F | 4.74641900  | 2.75536800  | -0.41529000 |
| F | 4.46870900  | 2.09274100  | 1.90870300  |
| F | 5.24885900  | -0.17299500 | 1.73791800  |
| F | 3.89019800  | -1.72459700 | 3.13101000  |
| F | -1.01877000 | -4.66556200 | 1.81100100  |
| F | -2.94894200 | -4.37800500 | 0.38524600  |
| F | -4.39651800 | -2.45830300 | 0.09489200  |
| F | -2.28113300 | -4.23104300 | -1.97465500 |
| F | 0.10543100  | -4.90944300 | -1.60734400 |
| F | 4.91206400  | -1.92457500 | 0.08135500  |
| F | 5.15094000  | -0.56145900 | -1.89912400 |
| F | 4.29268900  | 1.64598900  | -2.50573000 |
| F | -2.03569200 | 0.44142000  | -4.54531500 |
| F | -2.37499800 | -2.06300500 | -4.06593200 |
| F | 0.07213000  | -1.80323300 | -4.78856300 |
| F | 0.83147900  | -3.84020900 | -3.70579400 |
| F | 2.98572700  | -3.54688800 | -2.49660200 |
| F | 3.54895200  | -1.27620400 | -3.66747200 |
| F | -2.87453300 | 4.29149600  | 0.99809000  |
| F | -0.56649100 | 5.00833400  | 0.91229200  |
| F | 2.79363500  | 0.15485400  | 4.50709400  |
| F | 0.83800900  | -1.17630400 | 5.21209100  |
| F | 0.64428100  | -3.26314600 | 3.96532600  |
| F | -1.92325100 | -3.13176000 | 3.65704200  |
| F | -4.18612400 | -1.50232400 | 2.33271500  |



|    |             |             |             |
|----|-------------|-------------|-------------|
| F  | -4.78050100 | 0.91703800  | 1.41457400  |
| F  | -3.46687900 | 1.25897100  | 3.50631200  |
| F  | -2.21802800 | 3.33878400  | 3.17444800  |
| F  | -0.75445400 | 0.70161200  | 5.01888700  |
| H  | -4.70889100 | 1.83489600  | 0.59723000  |
| O  | -4.27863700 | 2.64217600  | -0.09187600 |
| H  | -4.72331400 | 2.72429500  | -0.95956600 |
| IP |             |             |             |
| C  | -2.99513500 | -0.92212000 | -0.67518700 |
| C  | -3.49667600 | 0.47478200  | -0.65934400 |
| C  | -3.11286700 | 1.38746000  | -1.86346000 |
| C  | -2.53315300 | 2.78800400  | -1.16981600 |
| C  | -1.09593800 | 3.22343300  | -1.60806000 |
| C  | -0.09039800 | 3.95400100  | -0.62064900 |
| C  | 1.39555500  | 3.43487100  | -1.12016900 |
| C  | 2.50959700  | 3.02111100  | -0.12048700 |
| C  | 3.62693700  | 1.86516100  | -0.50049300 |
| C  | 3.74350600  | 1.01452800  | 0.84317200  |
| C  | 4.01846400  | -0.52690400 | 0.81369000  |
| C  | 3.17445600  | -1.39193300 | 1.92876900  |
| C  | 2.14743000  | -2.03490800 | 1.08300700  |
| C  | 0.95065800  | -2.54994500 | 1.51762900  |
| C  | 0.03612900  | -3.00868500 | 0.60092900  |
| C  | -1.24503000 | -3.41068100 | 1.21227800  |
| C  | -2.43673800 | -3.11922000 | 0.21941700  |
| C  | -3.26789000 | -1.80475700 | 0.50483700  |
| C  | -2.35453500 | -1.53714300 | -1.65541300 |
| C  | -2.04396100 | -2.97046100 | -1.36141400 |
| C  | -0.60831100 | -3.32873600 | -1.82003700 |
| C  | 0.32571000  | -2.98074600 | -0.73631200 |
| C  | 1.52309200  | -2.47543400 | -1.17307400 |
| C  | 2.41558400  | -1.96450600 | -0.26137000 |
| C  | 3.68869500  | -1.27532900 | -0.55579500 |
| C  | 3.59275300  | -0.51022500 | -1.91344800 |
| C  | 3.30981600  | 1.05277200  | -1.80104600 |
| C  | 1.87448700  | 1.15032100  | -2.12976800 |
| C  | 1.03387600  | 2.19205200  | -1.82948700 |
| C  | -0.31055100 | 2.06417100  | -2.05804800 |
| C  | -0.80020300 | 0.94281900  | -2.66268000 |
| C  | -2.21819400 | 0.64489700  | -2.92003200 |
| C  | -2.14658000 | -0.93890000 | -2.99893400 |
| C  | -0.69176600 | -1.25796400 | -3.52456800 |
| C  | 0.03490700  | -2.57915800 | -3.08448200 |
| C  | 1.62138000  | -2.37297100 | -2.64436800 |

|   |             |             |             |
|---|-------------|-------------|-------------|
| C | 2.39128100  | -1.04581700 | -2.91760000 |
| C | 1.38932000  | 0.02868300  | -2.75647000 |
| C | 0.04602400  | -0.07942400 | -3.01788400 |
| C | -2.95275100 | 1.12138500  | 0.56455300  |
| C | -2.79661900 | 2.59969700  | 0.38749400  |
| C | -1.80934600 | 3.25352300  | 1.41822200  |
| C | -0.37239000 | 3.71249800  | 0.88808800  |
| C | 0.53872400  | 2.68873300  | 1.44516700  |
| C | 1.81322700  | 2.38836100  | 1.02037900  |
| C | 2.47651800  | 1.30999400  | 1.54919900  |
| C | 1.91587200  | 0.59064900  | 2.58292900  |
| C | 2.41208500  | -0.70805100 | 3.09901800  |
| C | 1.02694700  | -1.36954600 | 3.71828900  |
| C | 0.42660800  | -2.57534400 | 2.90222200  |
| C | -1.13133500 | -2.69121000 | 2.61840200  |
| C | -1.74613200 | -1.34550900 | 2.55983600  |
| C | -3.03636400 | -1.06114700 | 1.84135800  |
| C | -2.87364600 | 0.43614400  | 1.69597100  |
| C | -2.20884600 | 0.95810500  | 2.92497100  |
| C | -1.46140300 | 2.30569000  | 2.68401900  |
| C | -0.03131700 | 1.97333700  | 2.46317700  |
| C | 0.66754000  | 0.93080000  | 3.04348600  |
| C | 0.03527900  | -0.13735900 | 3.86029900  |
| C | -1.29685200 | -0.26412900 | 3.19877700  |
| F | -4.87316700 | 0.44436600  | -0.55969000 |
| F | -4.25509800 | 1.73648300  | -2.49387800 |
| F | -3.35547800 | 3.77562600  | -1.58857400 |
| F | -1.24429600 | 4.04873600  | -2.68896600 |
| F | -0.16833300 | 5.27553300  | -0.85161100 |
| F | 1.87273100  | 4.37408700  | -1.97503600 |
| F | 3.20448000  | 4.11710900  | 0.27527500  |
| F | 4.80748400  | 2.48043900  | -0.69178700 |
| F | 4.75600300  | 1.57654400  | 1.56743600  |
| F | 5.32836300  | -0.70267200 | 1.06331800  |
| F | 4.03039400  | -2.31551800 | 2.43652300  |
| F | -1.22921700 | -4.75399600 | 1.44115600  |
| F | -3.28237300 | -4.16258600 | 0.31946400  |
| F | -4.58864000 | -2.13362900 | 0.44676500  |
| F | -2.90643700 | -3.74869800 | -2.06935700 |
| F | -0.55853700 | -4.66687500 | -2.06577800 |
| F | 4.64923400  | -2.23396900 | -0.71368800 |
| F | 4.76488200  | -0.66904900 | -2.55155400 |
| F | 4.00938400  | 1.64275900  | -2.81465400 |
| F | -2.56768200 | 1.10263000  | -4.15463400 |

|   |             |             |             |
|---|-------------|-------------|-------------|
| F | -3.07003600 | -1.43324000 | -3.85666800 |
| F | -0.72560400 | -1.23321000 | -4.88518300 |
| F | 0.00487500  | -3.42806000 | -4.12459500 |
| F | 2.30835000  | -3.41717700 | -3.17142100 |
| F | 2.91154100  | -1.06516900 | -4.16969200 |
| F | -2.40240500 | 4.36221400  | 1.89807600  |
| F | -0.08077400 | 4.88487500  | 1.52801900  |
| F | 3.26384300  | -0.53559900 | 4.14113300  |
| F | 1.30945600  | -1.81278400 | 4.95576900  |
| F | 0.81870600  | -3.72404700 | 3.51982100  |
| F | -1.74776400 | -3.43519100 | 3.56834100  |
| F | -4.06943400 | -1.35975900 | 2.68901800  |
| F | -3.09562600 | 1.10421500  | 3.94689900  |
| F | -1.59105900 | 3.05953700  | 3.80776800  |
| F | -0.10854400 | 0.21080300  | 5.16812200  |
| O | -4.04201700 | 3.16217700  | 0.70011100  |
| H | -4.72200300 | 2.80169700  | 0.10577300  |

C<sub>1</sub>-S<sub>N</sub>2'-C1-F<sub>j</sub>

RC

|   |             |             |             |
|---|-------------|-------------|-------------|
| C | -3.07116600 | -0.46340700 | -0.41228900 |
| C | -3.33662400 | 0.97660300  | -0.64307500 |
| C | -2.83251300 | 1.56886800  | -1.99918800 |
| C | -1.91226200 | 2.83258400  | -1.52640900 |
| C | -0.53567600 | 3.05284400  | -2.18625800 |
| C | 0.64096400  | 3.76079000  | -1.35289300 |
| C | 1.98395200  | 2.91010800  | -1.78525600 |
| C | 3.06326700  | 2.49965400  | -0.74446700 |
| C | 3.94368700  | 1.11390900  | -0.92033900 |
| C | 3.98739800  | 0.51537000  | 0.55507200  |
| C | 3.99778700  | -1.02776200 | 0.81183400  |
| C | 3.08299300  | -1.51199700 | 2.08855300  |
| C | 1.92119600  | -2.11854700 | 1.40538500  |
| C | 0.68090000  | -2.33491600 | 1.95359600  |
| C | -0.34603300 | -2.79111400 | 1.16134800  |
| C | -1.64545200 | -2.82971200 | 1.86234700  |
| C | -2.82866800 | -2.52050200 | 0.86393900  |
| C | -3.43111800 | -1.05084100 | 0.91750600  |
| C | -2.57032500 | -1.34088100 | -1.26833600 |
| C | -2.49274200 | -2.72805400 | -0.72228800 |
| C | -1.16570400 | -3.41590000 | -1.13931000 |
| C | -0.12562600 | -3.05823400 | -0.16174000 |
| C | 1.11461300  | -2.85276000 | -0.71104500 |
| C | 2.12459600  | -2.34108600 | 0.06694000  |
| C | 3.47481700  | -1.94369800 | -0.38245700 |

|   |             |             |             |
|---|-------------|-------------|-------------|
| C | 3.43619000  | -1.43442800 | -1.85821500 |
| C | 3.43234400  | 0.14871000  | -2.04270400 |
| C | 2.02380200  | 0.44102700  | -2.37770500 |
| C | 1.38754600  | 1.65416200  | -2.28407300 |
| C | 0.03495800  | 1.73358700  | -2.50328500 |
| C | -0.68095400 | 0.61405100  | -2.84204600 |
| C | -2.15733200 | 0.49976100  | -2.94619100 |
| C | -2.32810500 | -1.06201900 | -2.70839100 |
| C | -0.97659500 | -1.70672000 | -3.19475000 |
| C | -0.46600100 | -3.03092900 | -2.53288400 |
| C | 1.14900500  | -3.02895400 | -2.17711300 |
| C | 2.11103800  | -1.92582400 | -2.71538700 |
| C | 1.32099700  | -0.67657900 | -2.75581400 |
| C | -0.03235700 | -0.59284600 | -2.96945000 |
| C | -2.58613300 | 1.69098200  | 0.42527700  |
| C | -1.78370100 | 2.63396500  | -0.04815500 |
| C | -1.03117300 | 3.60348200  | 0.78459600  |
| C | 0.40412100  | 3.87495400  | 0.19767800  |
| C | 1.20624100  | 2.87914300  | 0.95075800  |
| C | 2.35229700  | 2.24266100  | 0.52857100  |
| C | 2.83812600  | 1.16304600  | 1.22560100  |
| C | 2.22677100  | 0.75764700  | 2.39056300  |
| C | 2.50891300  | -0.50194700 | 3.12036800  |
| C | 1.06288900  | -0.78271400 | 3.87062600  |
| C | 0.22673600  | -1.99458500 | 3.31918700  |
| C | -1.33315200 | -1.87229200 | 3.07179900  |
| C | -1.70394800 | -0.47965800 | 2.72278300  |
| C | -3.03253700 | -0.15633500 | 2.12627900  |
| C | -2.90170900 | 1.38574600  | 1.85053100  |
| C | -1.77146600 | 1.89234100  | 2.79684300  |
| C | -0.80632100 | 3.02435400  | 2.23346100  |
| C | 0.56922700  | 2.45956700  | 2.09780000  |
| C | 1.09578600  | 1.40841700  | 2.82183600  |
| C | 0.30155700  | 0.60465700  | 3.78326700  |
| C | -1.04357300 | 0.59705900  | 3.13068200  |
| F | -4.66237900 | 1.24868400  | -0.45064800 |
| F | -3.88442400 | 2.09260600  | -2.65634600 |
| F | -2.63916700 | 3.96877900  | -1.71789100 |
| F | -0.72336100 | 3.76959200  | -3.32861100 |
| F | 0.77973600  | 5.00866200  | -1.83138900 |
| F | 2.57663800  | 3.60057300  | -2.79336700 |
| F | 3.95519800  | 3.51347400  | -0.60304400 |
| F | 5.20015500  | 1.46800800  | -1.24530000 |
| F | 5.11753300  | 1.01506200  | 1.13892100  |

|    |                                 |             |                          |
|----|---------------------------------|-------------|--------------------------|
| F  | 5.27221900                      | -1.38055100 | 1.05992900               |
| F  | 3.80210200                      | -2.45601700 | 2.74854900               |
| F  | -1.84939500                     | -4.07911200 | 2.36643300               |
| F  | -3.82315300                     | -3.37273200 | 1.17535000               |
| F  | -4.78978600                     | -1.15843400 | 0.93508300               |
| F  | -3.50863100                     | -3.45161200 | -1.26626900              |
| F  | -1.36584500                     | -4.76260200 | -1.13591000              |
| F  | 4.25474500                      | -3.06486700 | -0.37461000              |
| F  | 4.53074100                      | -1.91226400 | -2.47655200              |
| F  | 4.18330200                      | 0.40828300  | -3.15419900              |
| F  | -2.55828300                     | 0.76984000  | -4.21910400              |
| F  | -3.32146500                     | -1.60120100 | -3.45543300              |
| F  | -1.08911300                     | -1.93254500 | -4.53476100              |
| F  | -0.69365600                     | -4.03390700 | -3.39725300              |
| F  | 1.62678400                      | -4.25246700 | -2.51958900              |
| F  | 2.55099900                      | -2.27190400 | -3.95138200              |
| F  | -1.73122200                     | 4.76352900  | 0.83219200               |
| F  | 0.76658100                      | 5.12983100  | 0.58581800               |
| F  | 3.42661700                      | -0.30074400 | 4.09988200               |
| F  | 1.32309600                      | -1.02253100 | 5.16794200               |
| F  | 0.43098200                      | -3.05247600 | 4.15176400               |
| F  | -2.03426300                     | -2.25506200 | 4.16653700               |
| F  | -3.96690900                     | -0.34341200 | 3.10202700               |
| F  | -4.07187700                     | 2.00278700  | 2.15484500               |
| F  | -2.34994200                     | 2.35925400  | 3.93251500               |
| F  | -0.81906900                     | 4.06650400  | 3.10394500               |
| F  | 0.21514500                      | 1.17208100  | 5.01753500               |
| H  | -5.87434800                     | 0.46779000  | -2.33621600              |
| O  | -5.31557700                     | -0.31532400 | -2.41579300              |
| H  | -5.43119000                     | -0.61205200 | -3.32700300              |
| TS | imaginary vibrational frequency |             | -814.88 cm <sup>-1</sup> |
| C  | -3.41447400                     | -0.26205600 | -0.84244200              |
| C  | -3.31845400                     | 1.25102300  | -0.82598000              |
| C  | -2.59143200                     | 1.94790500  | -2.04792600              |
| C  | -1.66753300                     | 3.08033400  | -1.34066900              |
| C  | -0.22454000                     | 3.33543500  | -1.85045700              |
| C  | 0.90013100                      | 3.87235700  | -0.83215600              |
| C  | 2.25160500                      | 3.02453100  | -1.25811100              |
| C  | 3.21745800                      | 2.43009300  | -0.19442800              |
| C  | 4.05297000                      | 1.03189100  | -0.47392800              |
| C  | 3.94374500                      | 0.25351800  | 0.91081700               |
| C  | 3.86641000                      | -1.30954500 | 0.96920700               |
| C  | 2.83284500                      | -1.90476500 | 2.09699300               |
| C  | 1.71537800                      | -2.38303300 | 1.25577200               |

|   |             |             |             |
|---|-------------|-------------|-------------|
| C | 0.42911400  | -2.62324500 | 1.67488800  |
| C | -0.54261600 | -2.95099100 | 0.75747300  |
| C | -1.90243100 | -2.95079700 | 1.34419300  |
| C | -2.96853000 | -2.43155400 | 0.28309400  |
| C | -3.63664900 | -0.99416200 | 0.51900400  |
| C | -2.28983800 | -0.92192700 | -1.48465700 |
| C | -2.37451500 | -2.28105100 | -1.17167500 |
| C | -1.22401000 | -3.14922300 | -1.67213800 |
| C | -0.22787400 | -3.06416800 | -0.57235900 |
| C | 1.05818000  | -2.82244100 | -0.99251000 |
| C | 2.01828000  | -2.44761900 | -0.08054300 |
| C | 3.41313100  | -2.04761800 | -0.36777900 |
| C | 3.52086400  | -1.35528000 | -1.76219400 |
| C | 3.60400200  | 0.23760000  | -1.74550200 |
| C | 2.25004900  | 0.64894400  | -2.16388400 |
| C | 1.66337700  | 1.87588900  | -1.97484600 |
| C | 0.34149700  | 2.05425700  | -2.30244900 |
| C | -0.37880700 | 1.02707500  | -2.84209600 |
| C | -1.84421800 | 0.97865300  | -3.03523800 |
| C | -2.06704800 | -0.55960700 | -2.91231400 |
| C | -0.76672300 | -1.22259400 | -3.45822100 |
| C | -0.36959300 | -2.64121100 | -2.93366500 |
| C | 1.20515200  | -2.77717900 | -2.46123400 |
| C | 2.25826500  | -1.66678400 | -2.77570000 |
| C | 1.53931500  | -0.37604100 | -2.74333700 |
| C | 0.22235600  | -0.19157700 | -3.07105900 |
| C | -2.54159800 | 1.70331500  | 0.36991500  |
| C | -1.66799700 | 2.66445500  | 0.09502600  |
| C | -0.96272100 | 3.49797800  | 1.10583100  |
| C | 0.52469500  | 3.79384100  | 0.68970700  |
| C | 1.23360900  | 2.68632000  | 1.37816000  |
| C | 2.39055700  | 2.05620100  | 0.97527900  |
| C | 2.76915500  | 0.87329900  | 1.56306900  |
| C | 2.04506300  | 0.35546700  | 2.61267000  |
| C | 2.21391200  | -0.99812300 | 3.19479100  |
| C | 0.70375900  | -1.29911700 | 3.78509900  |
| C | -0.12828100 | -2.39614000 | 3.02708200  |
| C | -1.64685300 | -2.15273300 | 2.66542000  |
| C | -1.92545300 | -0.71612900 | 2.44551900  |
| C | -3.19888000 | -0.24843000 | 1.82249600  |
| C | -2.97940300 | 1.28703200  | 1.72976400  |
| C | -1.92249600 | 1.62280200  | 2.82463800  |
| C | -0.87769700 | 2.76070500  | 2.49043700  |
| C | 0.48581800  | 2.15866000  | 2.40760700  |

|    |             |             |             |
|----|-------------|-------------|-------------|
| C  | 0.90791100  | 1.00215100  | 3.03293000  |
| C  | 0.00436300  | 0.12342000  | 3.81431600  |
| C  | -1.27330400 | 0.26609100  | 3.05331800  |
| F  | -4.59029000 | 1.75472200  | -0.71402700 |
| F  | -3.54088600 | 2.58892400  | -2.75792900 |
| F  | -2.33922600 | 4.26229500  | -1.42664100 |
| F  | -0.29734000 | 4.21553800  | -2.88640200 |
| F  | 1.12665800  | 5.16511100  | -1.12115700 |
| F  | 2.95739000  | 3.82099900  | -2.10252000 |
| F  | 4.13720500  | 3.36929800  | 0.14708600  |
| F  | 5.34621500  | 1.36065400  | -0.64867100 |
| F  | 5.03947000  | 0.61599400  | 1.64273800  |
| F  | 5.10143200  | -1.75093200 | 1.27147200  |
| F  | 3.46480100  | -2.94892900 | 2.69443800  |
| F  | -2.24975700 | -4.22009000 | 1.69199900  |
| F  | -3.96941200 | -3.33426900 | 0.31341100  |
| F  | -4.98560200 | -1.18310300 | 0.65849400  |
| F  | -3.76171900 | -2.83016900 | -2.05074900 |
| F  | -1.61861600 | -4.42907500 | -1.88835300 |
| F  | 4.15360000  | -3.19431400 | -0.44008000 |
| F  | 4.64332100  | -1.80995300 | -2.34858500 |
| F  | 4.46624800  | 0.58260600  | -2.74796900 |
| F  | -2.15095900 | 1.37520800  | -4.30344900 |
| F  | -3.10326800 | -0.91709600 | -3.74003900 |
| F  | -0.84701500 | -1.29036700 | -4.81849400 |
| F  | -0.56750100 | -3.52268600 | -3.92864700 |
| F  | 1.66177000  | -3.96105300 | -2.94701500 |
| F  | 2.79300600  | -1.90122400 | -4.00170800 |
| F  | -1.64345600 | 4.66491000  | 1.23016200  |
| F  | 0.87188900  | 4.97673700  | 1.27052600  |
| F  | 3.05368400  | -0.96076800 | 4.26178200  |
| F  | 0.84216700  | -1.70521300 | 5.05983800  |
| F  | -0.06115900 | -3.54519300 | 3.75554100  |
| F  | -2.46026800 | -2.60762000 | 3.65119300  |
| F  | -4.17577300 | -0.47557100 | 2.75198400  |
| F  | -4.14546100 | 1.93212300  | 1.99996400  |
| F  | -2.58722800 | 1.97730900  | 3.95409900  |
| F  | -0.93952400 | 3.70255900  | 3.46633700  |
| F  | -0.17393400 | 0.53422700  | 5.10003100  |
| H  | -4.41948300 | -1.70398400 | -1.96126000 |
| O  | -4.63331700 | -0.63677400 | -1.69129800 |
| H  | -5.46213800 | -0.54275600 | -1.17641500 |
| IP |             |             |             |
| C  | 3.51777200  | -0.15541700 | 1.34747100  |

|   |             |             |             |
|---|-------------|-------------|-------------|
| C | 3.46819500  | 1.13862600  | 0.51825300  |
| C | 2.80418900  | 2.41024200  | 1.17678700  |
| C | 2.07990900  | 3.13021800  | -0.09427900 |
| C | 0.66658200  | 3.74047800  | 0.06335300  |
| C | -0.32463700 | 3.81756100  | -1.20388600 |
| C | -1.79761100 | 3.42418900  | -0.57312200 |
| C | -2.79672200 | 2.49296400  | -1.32140700 |
| C | -3.83453200 | 1.50406600  | -0.49540300 |
| C | -3.77672100 | 0.13828400  | -1.31063500 |
| C | -3.92340000 | -1.25231700 | -0.59690100 |
| C | -2.93403700 | -2.43001400 | -1.16964700 |
| C | -1.95290100 | -2.57033000 | -0.07070700 |
| C | -0.69870700 | -3.13224800 | -0.17054800 |
| C | 0.16180500  | -3.09067900 | 0.90405800  |
| C | 1.56476800  | -3.44781700 | 0.53522800  |
| C | 2.58159400  | -2.49775100 | 1.31619800  |
| C | 3.55021800  | -1.51901100 | 0.50600900  |
| C | 2.33029700  | -0.31691300 | 2.23803000  |
| C | 1.85773700  | -1.55421500 | 2.27137500  |
| C | 0.69907800  | -2.01524300 | 3.10703900  |
| C | -0.24994900 | -2.49781200 | 2.07782800  |
| C | -1.49610400 | -1.92710100 | 2.17918800  |
| C | -2.33713800 | -1.94256800 | 1.08906200  |
| C | -3.65712800 | -1.28010800 | 0.97399600  |
| C | -3.71293600 | 0.02380800  | 1.83495500  |
| C | -3.55420000 | 1.39607800  | 1.03824600  |
| C | -2.16378000 | 1.79189600  | 1.33685600  |
| C | -1.40054300 | 2.70333400  | 0.65112600  |
| C | -0.08484800 | 2.88350200  | 0.99383100  |
| C | 0.46151900  | 2.17062100  | 2.02579600  |
| C | 1.88418200  | 2.14093300  | 2.42478300  |
| C | 1.93640400  | 0.76160700  | 3.18480400  |
| C | 0.47132400  | 0.53518300  | 3.73675400  |
| C | -0.11595300 | -0.90712800 | 3.89998500  |
| C | -1.68073700 | -1.10481000 | 3.39814000  |
| C | -2.55234800 | 0.11937200  | 2.99553700  |
| C | -1.63241700 | 1.11113100  | 2.40305000  |
| C | -0.31432200 | 1.28958300  | 2.73868800  |
| C | 2.80185800  | 0.99518900  | -0.80640900 |
| C | 2.07260500  | 2.05457500  | -1.13480000 |
| C | 1.54734300  | 2.34498500  | -2.49672700 |
| C | 0.10185500  | 2.96117900  | -2.44866900 |
| C | -0.72900900 | 1.73712100  | -2.59329200 |
| C | -1.98308500 | 1.50895800  | -2.06969100 |



|   |             |             |             |
|---|-------------|-------------|-------------|
| C | -2.49823400 | 0.23413000  | -2.04965900 |
| C | -1.80367700 | -0.80637000 | -2.62173300 |
| C | -2.13450100 | -2.24573600 | -2.48674900 |
| C | -0.66092800 | -2.95167700 | -2.68037000 |
| C | -0.03339500 | -3.62017400 | -1.40121900 |
| C | 1.48152200  | -3.37014500 | -1.02485700 |
| C | 1.94896000  | -2.04345300 | -1.48432900 |
| C | 3.25801300  | -1.46682900 | -1.03719500 |
| C | 3.24822200  | -0.07877200 | -1.73251500 |
| C | 2.30403400  | -0.22564800 | -2.96015400 |
| C | 1.42451200  | 1.03107400  | -3.34801300 |
| C | -0.01544500 | 0.69427400  | -3.14333000 |
| C | -0.56708800 | -0.57142400 | -3.17358800 |
| C | 0.23932900  | -1.80906600 | -3.31153900 |
| C | 1.47509700  | -1.43481400 | -2.56333600 |
| F | 4.78072100  | 1.46319000  | 0.24292500  |
| F | 3.79586200  | 3.22057700  | 1.59383400  |
| F | 2.91275500  | 4.11725700  | -0.52264300 |
| F | 0.79829600  | 4.99795600  | 0.56460400  |
| F | -0.37998300 | 5.10152200  | -1.59458000 |
| F | -2.41797100 | 4.59379000  | -0.27158100 |
| F | -3.55586100 | 3.23814300  | -2.16441100 |
| F | -5.07407900 | 2.00590600  | -0.63849900 |
| F | -4.77677600 | 0.20540700  | -2.24016800 |
| F | -5.19298100 | -1.65527600 | -0.79028700 |
| F | -3.68629900 | -3.55721900 | -1.27517600 |
| F | 1.83750100  | -4.73485400 | 0.87336400  |
| F | 3.37119600  | -3.30800200 | 2.06806000  |
| F | 4.81144800  | -1.99714400 | 0.62241500  |
| F | 1.10089500  | -2.99519300 | 3.96275500  |
| F | -4.58087600 | -2.13592300 | 1.50466200  |
| F | -4.91064000 | 0.04998000  | 2.44592400  |
| F | -4.37969700 | 2.29551900  | 1.65198300  |
| F | 2.11745000  | 3.13132100  | 3.33029500  |
| F | 2.81253800  | 0.81832700  | 4.21428100  |
| F | 0.38720900  | 1.15618700  | 4.94646800  |
| F | -0.07043300 | -1.22255100 | 5.20663200  |
| F | -2.32248100 | -1.80224000 | 4.36921100  |
| F | -3.15196300 | 0.61866400  | 4.10740500  |
| F | 2.39705400  | 3.21776500  | -3.09270300 |
| F | -0.04000900 | 3.73481500  | -3.56133700 |
| F | -2.90627700 | -2.65598100 | -3.52624800 |
| F | -0.79701300 | -3.91480900 | -3.60951600 |
| F | -0.20468200 | -4.96713700 | -1.50916500 |

|   |            |             |             |
|---|------------|-------------|-------------|
| F | 2.28046500 | -4.31730100 | -1.57819500 |
| F | 4.21949700 | -2.22145600 | -1.65159000 |
| F | 4.50216800 | 0.23076000  | -2.15686800 |
| F | 3.06103200 | -0.56154600 | -4.03521200 |
| F | 1.67482100 | 1.35078300  | -4.64356100 |
| F | 0.55338800 | -2.11070300 | -4.60152100 |
| O | 4.59704300 | -0.09519300 | 2.22027600  |
| H | 5.39585200 | 0.12933400  | 1.71344700  |

C<sub>1</sub>-S<sub>N</sub>2'-C1-F<sub>k</sub>

RC

|   |             |             |             |
|---|-------------|-------------|-------------|
| C | -3.07116600 | -0.46340700 | -0.41228900 |
| C | -3.33662400 | 0.97660300  | -0.64307500 |
| C | -2.83251300 | 1.56886800  | -1.99918800 |
| C | -1.91226200 | 2.83258400  | -1.52640900 |
| C | -0.53567600 | 3.05284400  | -2.18625800 |
| C | 0.64096400  | 3.76079000  | -1.35289300 |
| C | 1.98395200  | 2.91010800  | -1.78525600 |
| C | 3.06326700  | 2.49965400  | -0.74446700 |
| C | 3.94368700  | 1.11390900  | -0.92033900 |
| C | 3.98739800  | 0.51537000  | 0.55507200  |
| C | 3.99778700  | -1.02776200 | 0.81183400  |
| C | 3.08299300  | -1.51199700 | 2.08855300  |
| C | 1.92119600  | -2.11854700 | 1.40538500  |
| C | 0.68090000  | -2.33491600 | 1.95359600  |
| C | -0.34603300 | -2.79111400 | 1.16134800  |
| C | -1.64545200 | -2.82971200 | 1.86234700  |
| C | -2.82866800 | -2.52050200 | 0.86393900  |
| C | -3.43111800 | -1.05084100 | 0.91750600  |
| C | -2.57032500 | -1.34088100 | -1.26833600 |
| C | -2.49274200 | -2.72805400 | -0.72228800 |
| C | -1.16570400 | -3.41590000 | -1.13931000 |
| C | -0.12562600 | -3.05823400 | -0.16174000 |
| C | 1.11461300  | -2.85276000 | -0.71104500 |
| C | 2.12459600  | -2.34108600 | 0.06694000  |
| C | 3.47481700  | -1.94369800 | -0.38245700 |
| C | 3.43619000  | -1.43442800 | -1.85821500 |
| C | 3.43234400  | 0.14871000  | -2.04270400 |
| C | 2.02380200  | 0.44102700  | -2.37770500 |
| C | 1.38754600  | 1.65416200  | -2.28407300 |
| C | 0.03495800  | 1.73358700  | -2.50328500 |
| C | -0.68095400 | 0.61405100  | -2.84204600 |
| C | -2.15733200 | 0.49976100  | -2.94619100 |
| C | -2.32810500 | -1.06201900 | -2.70839100 |
| C | -0.97659500 | -1.70672000 | -3.19475000 |

|   |             |             |             |
|---|-------------|-------------|-------------|
| C | -0.46600100 | -3.03092900 | -2.53288400 |
| C | 1.14900500  | -3.02895400 | -2.17711300 |
| C | 2.11103800  | -1.92582400 | -2.71538700 |
| C | 1.32099700  | -0.67657900 | -2.75581400 |
| C | -0.03235700 | -0.59284600 | -2.96945000 |
| C | -2.58613300 | 1.69098200  | 0.42527700  |
| C | -1.78370100 | 2.63396500  | -0.04815500 |
| C | -1.03117300 | 3.60348200  | 0.78459600  |
| C | 0.40412100  | 3.87495400  | 0.19767800  |
| C | 1.20624100  | 2.87914300  | 0.95075800  |
| C | 2.35229700  | 2.24266100  | 0.52857100  |
| C | 2.83812600  | 1.16304600  | 1.22560100  |
| C | 2.22677100  | 0.75764700  | 2.39056300  |
| C | 2.50891300  | -0.50194700 | 3.12036800  |
| C | 1.06288900  | -0.78271400 | 3.87062600  |
| C | 0.22673600  | -1.99458500 | 3.31918700  |
| C | -1.33315200 | -1.87229200 | 3.07179900  |
| C | -1.70394800 | -0.47965800 | 2.72278300  |
| C | -3.03253700 | -0.15633500 | 2.12627900  |
| C | -2.90170900 | 1.38574600  | 1.85053100  |
| C | -1.77146600 | 1.89234100  | 2.79684300  |
| C | -0.80632100 | 3.02435400  | 2.23346100  |
| C | 0.56922700  | 2.45956700  | 2.09780000  |
| C | 1.09578600  | 1.40841700  | 2.82183600  |
| C | 0.30155700  | 0.60465700  | 3.78326700  |
| C | -1.04357300 | 0.59705900  | 3.13068200  |
| F | -4.66237900 | 1.24868400  | -0.45064800 |
| F | -3.88442400 | 2.09260600  | -2.65634600 |
| F | -2.63916700 | 3.96877900  | -1.71789100 |
| F | -0.72336100 | 3.76959200  | -3.32861100 |
| F | 0.77973600  | 5.00866200  | -1.83138900 |
| F | 2.57663800  | 3.60057300  | -2.79336700 |
| F | 3.95519800  | 3.51347400  | -0.60304400 |
| F | 5.20015500  | 1.46800800  | -1.24530000 |
| F | 5.11753300  | 1.01506200  | 1.13892100  |
| F | 5.27221900  | -1.38055100 | 1.05992900  |
| F | 3.80210200  | -2.45601700 | 2.74854900  |
| F | -1.84939500 | -4.07911200 | 2.36643300  |
| F | -3.82315300 | -3.37273200 | 1.17535000  |
| F | -4.78978600 | -1.15843400 | 0.93508300  |
| F | -3.50863100 | -3.45161200 | -1.26626900 |
| F | -1.36584500 | -4.76260200 | -1.13591000 |
| F | 4.25474500  | -3.06486700 | -0.37461000 |
| F | 4.53074100  | -1.91226400 | -2.47655200 |

|    |                                 |             |                          |
|----|---------------------------------|-------------|--------------------------|
| F  | 4.18330200                      | 0.40828300  | -3.15419900              |
| F  | -2.55828300                     | 0.76984000  | -4.21910400              |
| F  | -3.32146500                     | -1.60120100 | -3.45543300              |
| F  | -1.08911300                     | -1.93254500 | -4.53476100              |
| F  | -0.69365600                     | -4.03390700 | -3.39725300              |
| F  | 1.62678400                      | -4.25246700 | -2.51958900              |
| F  | 2.55099900                      | -2.27190400 | -3.95138200              |
| F  | -1.73122200                     | 4.76352900  | 0.83219200               |
| F  | 0.76658100                      | 5.12983100  | 0.58581800               |
| F  | 3.42661700                      | -0.30074400 | 4.09988200               |
| F  | 1.32309600                      | -1.02253100 | 5.16794200               |
| F  | 0.43098200                      | -3.05247600 | 4.15176400               |
| F  | -2.03426300                     | -2.25506200 | 4.16653700               |
| F  | -3.96690900                     | -0.34341200 | 3.10202700               |
| F  | -4.07187700                     | 2.00278700  | 2.15484500               |
| F  | -2.34994200                     | 2.35925400  | 3.93251500               |
| F  | -0.81906900                     | 4.06650400  | 3.10394500               |
| F  | 0.21514500                      | 1.17208100  | 5.01753500               |
| H  | -5.87434800                     | 0.46779000  | -2.33621600              |
| O  | -5.31557700                     | -0.31532400 | -2.41579300              |
| H  | -5.43119000                     | -0.61205200 | -3.32700300              |
| TS | imaginary vibrational frequency |             | -811.79 cm <sup>-1</sup> |
| C  | -3.42506900                     | -0.27638800 | -0.82651800              |
| C  | -3.31234400                     | 1.24052900  | -0.78414500              |
| C  | -2.60823300                     | 1.93843200  | -2.01484900              |
| C  | -1.68781600                     | 3.07320900  | -1.32149800              |
| C  | -0.25744500                     | 3.33468700  | -1.85331600              |
| C  | 0.87316600                      | 3.87412000  | -0.84329200              |
| C  | 2.22101400                      | 3.03103800  | -1.28192900              |
| C  | 3.19791700                      | 2.44566400  | -0.22525000              |
| C  | 4.03683200                      | 1.05581200  | -0.51180100              |
| C  | 3.95008500                      | 0.28079800  | 0.87787800               |
| C  | 3.88952800                      | -1.28082000 | 0.94136600               |
| C  | 2.86753500                      | -1.88312900 | 2.07985200               |
| C  | 1.74539700                      | -2.36350600 | 1.24737200               |
| C  | 0.46105900                      | -2.60284700 | 1.67576900               |
| C  | -0.51591500                     | -2.92403800 | 0.76337000               |
| C  | -1.87379200                     | -2.95907000 | 1.35543100               |
| C  | -2.96504200                     | -2.47352100 | 0.30911700               |
| C  | -3.64717300                     | -1.02474000 | 0.52345100               |
| C  | -2.29800500                     | -0.96014500 | -1.44643400              |
| C  | -2.44653200                     | -2.41172200 | -1.20512100              |
| C  | -1.18671800                     | -3.17566900 | -1.64168000              |
| C  | -0.19955700                     | -3.03620600 | -0.56214500              |

|   |             |             |             |
|---|-------------|-------------|-------------|
| C | 1.07885800  | -2.79667200 | -0.99617100 |
| C | 2.04247300  | -2.42378800 | -0.09132200 |
| C | 3.43086000  | -2.02108700 | -0.39266700 |
| C | 3.51402400  | -1.33140300 | -1.79293200 |
| C | 3.57980900  | 0.25851500  | -1.78043100 |
| C | 2.21996200  | 0.65772300  | -2.19633600 |
| C | 1.63220800  | 1.88211300  | -2.00030700 |
| C | 0.30914800  | 2.05844500  | -2.32493000 |
| C | -0.40506800 | 1.03135800  | -2.87481800 |
| C | -1.88054800 | 0.95896500  | -2.99909900 |
| C | -2.02120200 | -0.55475500 | -2.75197400 |
| C | -0.82192100 | -1.24038100 | -3.44233800 |
| C | -0.37672500 | -2.65054100 | -2.92236400 |
| C | 1.20615500  | -2.76659700 | -2.46744400 |
| C | 2.24620100  | -1.65611300 | -2.80176100 |
| C | 1.51358800  | -0.37060400 | -2.78172900 |
| C | 0.19348400  | -0.19109000 | -3.11509900 |
| C | -2.52828200 | 1.68901000  | 0.39889800  |
| C | -1.66875400 | 2.65906600  | 0.11503900  |
| C | -0.96827900 | 3.50020700  | 1.11836700  |
| C | 0.51289900  | 3.80030000  | 0.68537200  |
| C | 1.22980000  | 2.69497600  | 1.36788200  |
| C | 2.38470700  | 2.06974200  | 0.95355900  |
| C | 2.77599400  | 0.89066200  | 1.54040600  |
| C | 2.06319400  | 0.36897300  | 2.59629200  |
| C | 2.24685600  | -0.98138100 | 3.18135600  |
| C | 0.73943800  | -1.29176500 | 3.78293000  |
| C | -0.09151300 | -2.39173700 | 3.03160700  |
| C | -1.61929500 | -2.16507100 | 2.67890700  |
| C | -1.91523300 | -0.73136100 | 2.45812600  |
| C | -3.19700700 | -0.27044400 | 1.83377800  |
| C | -2.97270700 | 1.26966600  | 1.75433900  |
| C | -1.91055900 | 1.60808900  | 2.83997000  |
| C | -0.87306000 | 2.75638700  | 2.49952200  |
| C | 0.49234900  | 2.16221900  | 2.40278900  |
| C | 0.92316600  | 1.00672200  | 3.02248300  |
| C | 0.02904800  | 0.12304900  | 3.80989600  |
| C | -1.25692800 | 0.25379200  | 3.05765600  |
| F | -4.56521300 | 1.77077200  | -0.64712700 |
| F | -3.56728500 | 2.56563800  | -2.72464800 |
| F | -2.36870600 | 4.25035900  | -1.40050700 |
| F | -0.34841300 | 4.21890500  | -2.88434800 |
| F | 1.09363200  | 5.16697600  | -1.13706700 |
| F | 2.91646500  | 3.82919400  | -2.13352600 |

|    |             |             |             |
|----|-------------|-------------|-------------|
| F  | 4.11411900  | 3.39282700  | 0.10420200  |
| F  | 5.32637300  | 1.39113300  | -0.70274200 |
| F  | 5.04973500  | 0.65822100  | 1.59603700  |
| F  | 5.13016600  | -1.71141900 | 1.23489500  |
| F  | 3.51205700  | -2.92256500 | 2.67165300  |
| F  | -2.18188700 | -4.24237100 | 1.69524900  |
| F  | -3.97238400 | -3.37099900 | 0.38290900  |
| F  | -4.99298300 | -1.22681700 | 0.65145600  |
| F  | -3.49304800 | -2.95083400 | -1.95247900 |
| F  | -1.49452300 | -4.48647700 | -1.84690700 |
| F  | 4.17848300  | -3.16237500 | -0.47267900 |
| F  | 4.63514700  | -1.77614400 | -2.38938600 |
| F  | 4.43016100  | 0.61139400  | -2.79071200 |
| F  | -2.24556900 | 1.27440300  | -4.27012500 |
| F  | -3.43259600 | -0.88786600 | -3.67836100 |
| F  | -1.00768600 | -1.30693000 | -4.78671100 |
| F  | -0.57316600 | -3.52721800 | -3.92207700 |
| F  | 1.66200900  | -3.95363000 | -2.94626100 |
| F  | 2.77782600  | -1.89857400 | -4.02713600 |
| F  | -1.65331300 | 4.66339800  | 1.24939300  |
| F  | 0.86589300  | 4.98547500  | 1.25727600  |
| F  | 3.09148800  | -0.93431800 | 4.24382200  |
| F  | 0.88906200  | -1.69341800 | 5.05770900  |
| F  | -0.00554500 | -3.54287100 | 3.75491300  |
| F  | -2.42063700 | -2.62997000 | 3.66993100  |
| F  | -4.17353700 | -0.50517900 | 2.76036500  |
| F  | -4.13338000 | 1.91692400  | 2.03568500  |
| F  | -2.56543200 | 1.95722800  | 3.97692600  |
| F  | -0.93236500 | 3.69294000  | 3.48051900  |
| F  | -0.14522000 | 0.53749900  | 5.09523400  |
| H  | -4.21763700 | -0.78497600 | -2.74238300 |
| O  | -4.64790900 | -0.50393100 | -1.71217900 |
| H  | -5.25279300 | -1.16943800 | -1.32702000 |
| IP |             |             |             |
| C  | -3.47498400 | -0.19316400 | -1.39183800 |
| C  | -3.24507700 | 1.30308700  | -1.10953100 |
| C  | -2.39621700 | 2.14717800  | -2.14153900 |
| C  | -1.59311400 | 3.18478200  | -1.20364300 |
| C  | -0.11790300 | 3.53478600  | -1.52098100 |
| C  | 0.86062100  | 3.94244900  | -0.31059800 |
| C  | 2.27338000  | 3.17233100  | -0.67264600 |
| C  | 3.11214800  | 2.45724500  | 0.42249400  |
| C  | 4.01206000  | 1.12368600  | 0.08004600  |
| C  | 3.76584000  | 0.17712400  | 1.34103000  |

|   |             |             |             |
|---|-------------|-------------|-------------|
| C | 3.72671900  | -1.37919300 | 1.20197800  |
| C | 2.57730600  | -2.11919400 | 2.12059300  |
| C | 1.56921500  | -2.47480900 | 1.09964100  |
| C | 0.24491100  | -2.76279900 | 1.32579700  |
| C | -0.61035500 | -2.94764700 | 0.26452600  |
| C | -2.02334900 | -3.10589700 | 0.67181800  |
| C | -3.00843800 | -2.52024800 | -0.42954200 |
| C | -3.73727400 | -1.10708200 | -0.11265100 |
| C | -2.33751800 | -0.85077300 | -2.09097200 |
| C | -2.34760400 | -2.32860300 | -1.90833400 |
| C | -0.95445500 | -2.94207200 | -2.22874400 |
| C | -0.13212800 | -2.87687000 | -1.01280100 |
| C | 1.18997000  | -2.59169400 | -1.24191900 |
| C | 2.03094900  | -2.35308700 | -0.18640300 |
| C | 3.44516100  | -1.93939300 | -0.26145100 |
| C | 3.70334500  | -1.08445700 | -1.54487600 |
| C | 3.74546300  | 0.49295900  | -1.33062100 |
| C | 2.45331300  | 0.94813400  | -1.88882500 |
| C | 1.81562800  | 2.13302500  | -1.61896500 |
| C | 0.54446500  | 2.35098600  | -2.10173000 |
| C | -0.06560200 | 1.40994800  | -2.88427300 |
| C | -1.53451100 | 1.28787200  | -3.12250900 |
| C | -1.59669900 | -0.22151900 | -2.98535600 |
| C | -0.37664000 | -0.80263000 | -3.67973200 |
| C | 0.02245100  | -2.26162100 | -3.31293100 |
| C | 1.51989500  | -2.42096600 | -2.66805500 |
| C | 2.58715400  | -1.28509300 | -2.74877200 |
| C | 1.85603600  | 0.00320400  | -2.69744000 |
| C | 0.59562500  | 0.22671200  | -3.19334400 |
| C | -2.61077300 | 1.58804200  | 0.20787800  |
| C | -1.74283200 | 2.59213100  | 0.16038700  |
| C | -1.20451200 | 3.31490600  | 1.34182800  |
| C | 0.31078800  | 3.67796000  | 1.13995500  |
| C | 0.95515400  | 2.49753200  | 1.76652000  |
| C | 2.16103100  | 1.92952600  | 1.42563100  |
| C | 2.50243200  | 0.69241800  | 1.91570300  |
| C | 1.67673200  | 0.04530900  | 2.80788200  |
| C | 1.80929600  | -1.36691900 | 3.24141900  |
| C | 0.24139100  | -1.75497400 | 3.60238800  |
| C | -0.47123000 | -2.75193200 | 2.61842400  |
| C | -1.95321500 | -2.49631100 | 2.11438200  |
| C | -2.24673800 | -1.04680600 | 2.04340700  |
| C | -3.44483800 | -0.51036700 | 1.32138900  |
| C | -3.22212400 | 1.02378600  | 1.44037700  |

|   |             |             |             |
|---|-------------|-------------|-------------|
| C | -2.31825600 | 1.23056500  | 2.68878400  |
| C | -1.26900400 | 2.41398200  | 2.62552000  |
| C | 0.10797200  | 1.84139700  | 2.63329400  |
| C | 0.48033400  | 0.62170900  | 3.16130700  |
| C | -0.49062400 | -0.35568500 | 3.71392400  |
| C | -1.67466200 | -0.13897500 | 2.82603500  |
| F | -4.50029600 | 1.86495100  | -1.05080100 |
| F | -3.25302900 | 2.86391100  | -2.89366300 |
| F | -2.29016100 | 4.35591000  | -1.21449000 |
| F | -0.11594700 | 4.55701800  | -2.41952700 |
| F | 1.08733400  | 5.26305900  | -0.41029300 |
| F | 3.05796300  | 4.08221800  | -1.30698200 |
| F | 3.95170500  | 3.35990800  | 0.99408300  |
| F | 5.30646400  | 1.48956400  | 0.10603900  |
| F | 4.75741700  | 0.46340200  | 2.23614500  |
| F | 4.92708300  | -1.84632800 | 1.58984600  |
| F | 3.15289600  | -3.22998200 | 2.64805100  |
| F | -2.30215700 | -4.43370100 | 0.80007000  |
| F | -3.99520800 | -3.42751900 | -0.55587800 |
| F | -5.07313800 | -1.34961500 | -0.11446300 |
| F | -3.23548200 | -2.86226200 | -2.79300900 |
| F | -1.14000300 | -4.23863800 | -2.59989100 |
| F | 4.19599900  | -3.07389500 | -0.38983500 |
| F | 4.89966700  | -1.45807800 | -2.03434300 |
| F | 4.72562600  | 0.96313600  | -2.15906400 |
| F | -1.84586400 | 1.64638700  | -4.40260000 |
| F | -0.52900700 | -0.71935300 | -5.03355400 |
| F | -0.02194800 | -2.99992500 | -4.43449400 |
| F | 2.05199000  | -3.56080500 | -3.18195400 |
| F | 3.28019200  | -1.40908000 | -3.90850900 |
| F | -1.93365000 | 4.44329000  | 1.52183300  |
| F | 0.56584000  | 4.78419400  | 1.89307500  |
| F | 2.51059200  | -1.45801000 | 4.39958800  |
| F | 0.23871900  | -2.31557900 | 4.82414800  |
| F | -0.43908500 | -3.99044100 | 3.18246800  |
| F | -2.85277600 | -3.09919000 | 2.92929100  |
| F | -4.52095700 | -0.82060800 | 2.10638800  |
| F | -4.41277500 | 1.64837700  | 1.63670400  |
| F | -3.12198800 | 1.43578300  | 3.76353400  |
| F | -1.46977800 | 3.22745600  | 3.69376300  |
| F | -0.83293700 | -0.10569800 | 5.00794600  |
| O | -4.52966100 | -0.33245000 | -2.29290800 |
| H | -5.34903400 | -0.03305200 | -1.86336000 |

C<sub>1</sub>-S<sub>N</sub>2'-C19-F<sub>f</sub>



RC

|   |             |             |             |
|---|-------------|-------------|-------------|
| C | -3.06929500 | -0.36335700 | -0.47553100 |
| C | -3.26838800 | 1.05676100  | -0.84778500 |
| C | -2.70040900 | 1.49943200  | -2.23667800 |
| C | -1.74576200 | 2.76873500  | -1.85033200 |
| C | -0.33560600 | 2.87397500  | -2.47321200 |
| C | 0.84604700  | 3.60625200  | -1.66583800 |
| C | 2.16424000  | 2.66593700  | -1.97411300 |
| C | 3.19772900  | 2.30963400  | -0.86776200 |
| C | 4.01896200  | 0.87769500  | -0.89249000 |
| C | 3.99723900  | 0.41314600  | 0.63121100  |
| C | 3.92923300  | -1.10221700 | 1.02334900  |
| C | 2.95344900  | -1.43134600 | 2.30250000  |
| C | 1.78719700  | -2.04398100 | 1.63270600  |
| C | 0.52422800  | -2.16006800 | 2.15696600  |
| C | -0.49628700 | -2.65241200 | 1.37935400  |
| C | -1.81537000 | -2.57454700 | 2.04073200  |
| C | -2.95273500 | -2.30835200 | 0.97937100  |
| C | -3.49471900 | -0.81661300 | 0.88667300  |
| C | -2.55985500 | -1.32502600 | -1.22878900 |
| C | -2.57426400 | -2.66113700 | -0.56899800 |
| C | -1.27545500 | -3.44738700 | -0.88284000 |
| C | -0.24814500 | -3.04841800 | 0.09364300  |
| C | 1.01555000  | -2.94364600 | -0.43159400 |
| C | 2.02364300  | -2.40185200 | 0.32900500  |
| C | 3.40433000  | -2.10150600 | -0.10342600 |
| C | 3.43162300  | -1.72448200 | -1.61670100 |
| C | 3.49586100  | -0.16519000 | -1.93606200 |
| C | 2.10910900  | 0.14967400  | -2.32897500 |
| C | 1.52805700  | 1.39302900  | -2.36923100 |
| C | 0.18863800  | 1.50850400  | -2.64103400 |
| C | -0.56183500 | 0.39188300  | -2.90008100 |
| C | -2.03275700 | 0.33040500  | -3.05447600 |
| C | -2.28256000 | -1.18677300 | -2.68375000 |
| C | -0.95467700 | -1.93541000 | -3.07316200 |
| C | -0.52095800 | -3.21664700 | -2.28246100 |
| C | 1.08425300  | -3.25045400 | -1.87522800 |
| C | 2.11151700  | -2.23783600 | -2.47086800 |
| C | 1.37403400  | -0.96734600 | -2.63978300 |
| C | 0.03298400  | -0.84811800 | -2.90528100 |
| C | -2.51994500 | 1.83465800  | 0.17484400  |
| C | -1.66787200 | 2.70093600  | -0.35481000 |
| C | -0.89618100 | 3.70679000  | 0.41576900  |
| C | 0.56687100  | 3.86564100  | -0.14196600 |

|   |             |             |             |
|---|-------------|-------------|-------------|
| C | 1.30383100  | 2.90774800  | 0.72036600  |
| C | 2.44202600  | 2.20013600  | 0.40080100  |
| C | 2.86193400  | 1.16972800  | 1.20796300  |
| C | 2.19365200  | 0.88941700  | 2.37887500  |
| C | 2.39669200  | -0.31218300 | 3.22383000  |
| C | 0.91787900  | -0.46703500 | 3.94619800  |
| C | 0.04782400  | -1.68656200 | 3.47377600  |
| C | -1.49863900 | -1.52631200 | 3.17326700  |
| C | -1.80720500 | -0.15496400 | 2.69877600  |
| C | -3.09885400 | 0.17007700  | 2.02359400  |
| C | -2.88844500 | 1.67164100  | 1.60937500  |
| C | -1.76908700 | 2.21565500  | 2.54761900  |
| C | -0.73800800 | 3.24885000  | 1.91690200  |
| C | 0.61226500  | 2.61380100  | 1.87450900  |
| C | 1.07283800  | 1.61437500  | 2.70755100  |
| C | 0.21909300  | 0.93636100  | 3.71355400  |
| C | -1.11040400 | 0.92662000  | 3.02734300  |
| F | -4.58947700 | 1.38756300  | -0.74019800 |
| F | -3.72181300 | 1.97408700  | -2.97002300 |
| F | -2.42449800 | 3.90309400  | -2.17227700 |
| F | -0.44691000 | 3.48474500  | -3.68451400 |
| F | 1.05369900  | 4.80093900  | -2.24458800 |
| F | 2.81150100  | 3.23285800  | -3.02449500 |
| F | 4.13183400  | 3.29165100  | -0.79310100 |
| F | 5.29775000  | 1.14808700  | -1.21037500 |
| F | 5.13569300  | 0.91039300  | 1.19921200  |
| F | 5.17775800  | -1.48372400 | 1.34830600  |
| F | 3.60451100  | -2.34649800 | 3.06635600  |
| F | -2.08758300 | -3.76582100 | 2.64334400  |
| F | -3.99158400 | -3.09334100 | 1.32237500  |
| F | -4.86040600 | -0.87348600 | 0.88177100  |
| F | -3.61973900 | -3.36978600 | -1.08938900 |
| F | -1.53972400 | -4.77806600 | -0.76894600 |
| F | 4.13431300  | -3.24914000 | 0.02757600  |
| F | 4.52307700  | -2.29482200 | -2.15564200 |
| F | 4.27850500  | -0.03418500 | -3.04830900 |
| F | -2.36481900 | 0.49602100  | -4.36396000 |
| F | -3.29966700 | -1.72146800 | -3.39772300 |
| F | -1.03844300 | -2.26895700 | -4.39149100 |
| F | -0.76790900 | -4.28277900 | -3.06129100 |
| F | 1.51439700  | -4.51819800 | -2.09680100 |
| F | 2.57489400  | -2.70605300 | -3.65660700 |
| F | -1.54524600 | 4.89436600  | 0.33757900  |
| F | 0.97304800  | 5.13333400  | 0.14878100  |

|    |                                 |             |                          |
|----|---------------------------------|-------------|--------------------------|
| F  | 3.29224300                      | -0.06793600 | 4.21312800               |
| F  | 1.12967400                      | -0.60214500 | 5.26723100               |
| F  | 0.18322000                      | -2.67821800 | 4.39674000               |
| F  | -2.23432700                     | -1.79237500 | 4.28001800               |
| F  | -4.08111300                     | 0.12655200  | 2.96890000               |
| F  | -4.04071400                     | 2.36044500  | 1.81240600               |
| F  | -2.36698700                     | 2.81184500  | 3.60946200               |
| F  | -0.72538700                     | 4.36388500  | 2.69173400               |
| F  | 0.12937400                      | 1.61879000  | 4.88816600               |
| H  | -5.56877600                     | -1.77169000 | -2.10088700              |
| O  | -5.49848100                     | -0.81114200 | -2.02893500              |
| H  | -6.05034700                     | -0.58200400 | -1.27080100              |
| TS | imaginary vibrational frequency |             | -872.35 cm <sup>-1</sup> |
| C  | -2.73256600                     | -0.29058700 | -0.44132000              |
| C  | -2.95910600                     | 0.95559400  | -1.03968300              |
| C  | -2.54616400                     | 1.27440600  | -2.48426200              |
| C  | -1.58232200                     | 2.57695300  | -2.28245600              |
| C  | -0.15366700                     | 2.50387900  | -2.86335900              |
| C  | 1.04255700                      | 3.28999100  | -2.15198700              |
| C  | 2.31633600                      | 2.24959300  | -2.28986500              |
| C  | 3.30744900                      | 2.00655100  | -1.12019600              |
| C  | 4.05414300                      | 0.54694600  | -0.91524600              |
| C  | 3.97863500                      | 0.31541500  | 0.65764700               |
| C  | 3.82483900                      | -1.12080000 | 1.26460900               |
| C  | 2.81623000                      | -1.20743000 | 2.55488800               |
| C  | 1.62924000                      | -1.85111500 | 1.95573000               |
| C  | 0.35477900                      | -1.82301300 | 2.46134500               |
| C  | -0.68040400                     | -2.34702000 | 1.72566100               |
| C  | -1.99515100                     | -2.13119800 | 2.34420900               |
| C  | -3.09803700                     | -1.95902900 | 1.23993300               |
| C  | -3.39935700                     | -0.47695300 | 0.87887600               |
| C  | -3.03086400                     | -1.46244200 | -1.24681900              |
| C  | -2.83825000                     | -2.64207000 | -0.25565200              |
| C  | -1.47780000                     | -3.41983700 | -0.42537700              |
| C  | -0.45227200                     | -2.90288200 | 0.50016200               |
| C  | 0.82809300                      | -2.97387500 | 0.01321700               |
| C  | 1.86002100                      | -2.40323600 | 0.72056400               |
| C  | 3.26379100                      | -2.24865500 | 0.28454900               |
| C  | 3.33913100                      | -2.10527600 | -1.26621900              |
| C  | 3.49930100                      | -0.61413400 | -1.81144400              |
| C  | 2.13941700                      | -0.29066400 | -2.28511600              |
| C  | 1.62246900                      | 0.96267300  | -2.50620100              |
| C  | 0.29430800                      | 1.10313900  | -2.81040300              |
| C  | -0.50828800                     | -0.00311200 | -2.91690900              |

|   |             |             |             |
|---|-------------|-------------|-------------|
| C | -1.96293800 | -0.00452100 | -3.14711400 |
| C | -2.37626500 | -1.48345400 | -2.65218400 |
| C | -1.01910700 | -2.30629700 | -2.78001300 |
| C | -0.68277100 | -3.46569000 | -1.80555200 |
| C | 0.91084400  | -3.51931100 | -1.35570800 |
| C | 2.00770900  | -2.66975200 | -2.06882700 |
| C | 1.34593100  | -1.40143100 | -2.43376700 |
| C | 0.01212600  | -1.25232300 | -2.71775500 |
| C | -2.49714300 | 2.02795100  | -0.16170800 |
| C | -1.59346200 | 2.78294100  | -0.79242200 |
| C | -0.74454500 | 3.81693800  | -0.14658900 |
| C | 0.74300000  | 3.78475400  | -0.69309100 |
| C | 1.40956000  | 2.92070400  | 0.31218800  |
| C | 2.51683800  | 2.11923300  | 0.12663200  |
| C | 2.87287000  | 1.20241100  | 1.08567300  |
| C | 2.17650700  | 1.13668000  | 2.27167500  |
| C | 2.30575700  | 0.06491700  | 3.28855400  |
| C | 0.81335300  | 0.09350300  | 3.99578100  |
| C | -0.11400500 | -1.14114700 | 3.68769900  |
| C | -1.64035500 | -0.94440300 | 3.32781400  |
| C | -1.84616300 | 0.36270700  | 2.65969100  |
| C | -3.08667500 | 0.62140800  | 1.89502600  |
| C | -2.85151900 | 2.05111200  | 1.29070000  |
| C | -1.71099200 | 2.67898800  | 2.16040200  |
| C | -0.61958600 | 3.55096300  | 1.40735400  |
| C | 0.69326500  | 2.84248100  | 1.48354900  |
| C | 1.09618200  | 1.96230000  | 2.46930600  |
| C | 0.19993500  | 1.48999700  | 3.55264700  |
| C | -1.11596700 | 1.45199000  | 2.84954600  |
| F | -4.68920800 | 0.99191800  | -1.24147900 |
| F | -3.58249200 | 1.68648500  | -3.23737000 |
| F | -2.19674800 | 3.64546300  | -2.85727300 |
| F | -0.20580200 | 2.91810400  | -4.16037700 |
| F | 1.32149300  | 4.37322500  | -2.89719400 |
| F | 3.00512800  | 2.62638600  | -3.39801600 |
| F | 4.28987800  | 2.94297100  | -1.15590200 |
| F | 5.35122300  | 0.70601800  | -1.23721800 |
| F | 5.13027800  | 0.83426000  | 1.17950800  |
| F | 5.04707900  | -1.51282700 | 1.66678100  |
| F | 3.40587300  | -2.03105400 | 3.46020700  |
| F | -2.32510000 | -3.21480500 | 3.10324500  |
| F | -4.21408400 | -2.54318100 | 1.72791400  |
| F | -4.79424400 | -0.43718100 | 0.76184400  |
| F | -3.83974300 | -3.54174200 | -0.46093400 |

|    |             |             |             |
|----|-------------|-------------|-------------|
| F  | -1.74339400 | -4.71470600 | -0.07889500 |
| F  | 3.92673900  | -3.39914700 | 0.60663200  |
| F  | 4.40349600  | -2.80969400 | -1.68814600 |
| F  | 4.31724900  | -0.69093000 | -2.90209400 |
| F  | -2.21646900 | 0.05280800  | -4.48329700 |
| F  | -3.23646100 | -2.02141100 | -3.53974500 |
| F  | -1.00077100 | -2.83088000 | -4.04113200 |
| F  | -0.98329000 | -4.62426000 | -2.41581500 |
| F  | 1.27021300  | -4.82752400 | -1.35673700 |
| F  | 2.46356800  | -3.33124900 | -3.16217000 |
| F  | -1.27760100 | 5.04497300  | -0.36887800 |
| F  | 1.23401000  | 5.05121100  | -0.57547400 |
| F  | 3.20059000  | 0.41105100  | 4.24941000  |
| F  | 1.00131400  | 0.13423900  | 5.32672400  |
| F  | -0.04187600 | -1.98917900 | 4.75069500  |
| F  | -2.42142100 | -1.00263400 | 4.43391800  |
| F  | -4.10520500 | 0.68890200  | 2.80293400  |
| F  | -3.98926300 | 2.78181100  | 1.41334500  |
| F  | -2.28981500 | 3.45934500  | 3.10871700  |
| F  | -0.54377900 | 4.75951000  | 2.02289800  |
| F  | 0.14399100  | 2.34007300  | 4.61515300  |
| H  | -5.07171600 | -1.95473900 | -1.05606700 |
| O  | -4.52855800 | -1.35473700 | -1.60582400 |
| H  | -4.79127900 | -0.25725500 | -1.43368900 |
| IP |             |             |             |
| C  | -3.04928900 | -0.09393300 | -0.77923200 |
| C  | -2.57763000 | 0.94176800  | -1.45386300 |
| C  | -2.18778000 | 0.96727600  | -2.89339000 |
| C  | -1.12476900 | 2.20662300  | -2.92305500 |
| C  | 0.32595800  | 1.88915000  | -3.33578100 |
| C  | 1.53865600  | 2.68584600  | -2.65735800 |
| C  | 2.68531500  | 1.52106800  | -2.44823900 |
| C  | 3.53524000  | 1.43152600  | -1.15371400 |
| C  | 4.08885600  | -0.01867400 | -0.59037400 |
| C  | 3.85281400  | 0.08433000  | 0.98075600  |
| C  | 3.48555300  | -1.17556200 | 1.83578200  |
| C  | 2.36168700  | -0.89944700 | 3.00161700  |
| C  | 1.16541700  | -1.52723100 | 2.40436900  |
| C  | -0.13748300 | -1.26142800 | 2.73895300  |
| C  | -1.15902800 | -1.80843400 | 2.00015100  |
| C  | -2.49561000 | -1.37829500 | 2.44064900  |
| C  | -3.50151200 | -1.35515600 | 1.22606800  |
| C  | -3.67942800 | 0.06073400  | 0.56437600  |
| C  | -3.27097000 | -1.45154000 | -1.34208700 |

|   |             |             |             |
|---|-------------|-------------|-------------|
| C | -3.16338700 | -2.37974700 | -0.06462000 |
| C | -1.86927300 | -3.25834900 | 0.05844200  |
| C | -0.88251500 | -2.62272800 | 0.94255800  |
| C | 0.41782100  | -2.92915500 | 0.63349900  |
| C | 1.44127800  | -2.33676500 | 1.33099100  |
| C | 2.88642500  | -2.42027500 | 1.03656600  |
| C | 3.11198100  | -2.60471000 | -0.49583000 |
| C | 3.48184500  | -1.27831100 | -1.29704000 |
| C | 2.21142700  | -0.93143400 | -1.96353200 |
| C | 1.86568800  | 0.29139600  | -2.48526700 |
| C | 0.59976600  | 0.48700300  | -2.96969100 |
| C | -0.31301300 | -0.54127200 | -2.95683900 |
| C | -1.74210000 | -0.44335000 | -3.31557600 |
| C | -2.36246500 | -1.75788900 | -2.59885100 |
| C | -1.09744300 | -2.70751900 | -2.41259500 |
| C | -0.97645100 | -3.66374000 | -1.19582800 |
| C | 0.55525800  | -3.76818100 | -0.57248200 |
| C | 1.79842900  | -3.19438400 | -1.31472500 |
| C | 1.31601100  | -1.97073300 | -1.98766700 |
| C | 0.03778700  | -1.76226500 | -2.44762100 |
| C | -2.15979000 | 2.13705800  | -0.79433500 |
| C | -1.20672600 | 2.73770700  | -1.51230900 |
| C | -0.33046400 | 3.81231000  | -0.99777100 |
| C | 1.18298500  | 3.50581600  | -1.36104100 |
| C | 1.64387600  | 2.80117000  | -0.13821500 |
| C | 2.65796900  | 1.87109300  | -0.04521200 |
| C | 2.81901800  | 1.13787800  | 1.10562100  |
| C | 2.01718500  | 1.38241000  | 2.19842900  |
| C | 1.93737300  | 0.53731700  | 3.41516500  |
| C | 0.39977100  | 0.85181500  | 3.93897100  |
| C | -0.63139400 | -0.32439400 | 3.76888600  |
| C | -2.09559500 | -0.06407800 | 3.22410300  |
| C | -2.09509000 | 1.09388600  | 2.29635600  |
| C | -3.22668800 | 1.32016700  | 1.35897900  |
| C | -2.71751100 | 2.54066400  | 0.52116000  |
| C | -1.63026700 | 3.23977800  | 1.38070700  |
| C | -0.38317800 | 3.84324500  | 0.59144300  |
| C | 0.82325300  | 3.03477300  | 0.94157700  |
| C | 1.02660000  | 2.33136300  | 2.11452400  |
| C | -0.00674600 | 2.17714300  | 3.16961700  |
| C | -1.25631700 | 2.12338600  | 2.35382700  |
| F | -3.26785800 | 1.34098900  | -3.62435100 |
| F | -1.60098900 | 3.16360900  | -3.76114000 |
| F | 0.43027800  | 2.04357600  | -4.68446500 |

|   |             |             |             |
|---|-------------|-------------|-------------|
| F | 2.00512100  | 3.56008600  | -3.56530100 |
| F | 3.50899200  | 1.58734800  | -3.52609400 |
| F | 4.61693500  | 2.24442600  | -1.26475200 |
| F | 5.41775600  | -0.05537300 | -0.79570900 |
| F | 5.00700100  | 0.58923300  | 1.50943800  |
| F | 4.61325000  | -1.59124400 | 2.43900700  |
| F | 2.77047000  | -1.57406000 | 4.10716000  |
| F | -2.97492800 | -2.27346000 | 3.35051000  |
| F | -4.69391400 | -1.74712400 | 1.71125800  |
| F | -5.01687900 | 0.24157000  | 0.34020900  |
| F | -4.19132600 | -3.26040600 | -0.13405500 |
| F | -2.24451600 | -4.43323300 | 0.65198000  |
| F | 3.37489400  | -3.54088900 | 1.64591100  |
| F | 4.12305600  | -3.47517300 | -0.65625600 |
| F | 4.37130700  | -1.65073400 | -2.26431500 |
| F | -1.91232500 | -0.57862500 | -4.65784700 |
| F | -3.16506900 | -2.38229800 | -3.49451200 |
| F | -1.01523900 | -3.48380600 | -3.53521000 |
| F | -1.34974200 | -4.89287700 | -1.59201400 |
| F | 0.76401800  | -5.07091500 | -0.25902800 |
| F | 2.27041900  | -4.10437100 | -2.20218900 |
| F | -0.68637400 | 5.01380600  | -1.51123900 |
| F | 1.82314000  | 4.70565500  | -1.44699900 |
| F | 2.78063300  | 0.98809000  | 4.37789800  |
| F | 0.46955600  | 1.14615400  | 5.24887400  |
| F | -0.73570300 | -0.96109600 | 4.96804500  |
| F | -2.96021400 | 0.16752000  | 4.24007500  |
| F | -4.29225800 | 1.73560900  | 2.10540100  |
| F | -3.74565200 | 3.39182700  | 0.27327600  |
| F | -2.21551100 | 4.24528200  | 2.07808100  |
| F | -0.22630400 | 5.13464400  | 0.97988300  |
| F | -0.05329100 | 3.22747300  | 4.03460900  |
| O | -4.59782500 | -1.42968900 | -1.76815500 |
| H | -4.85402800 | -2.32375900 | -2.05002800 |

C<sub>1</sub>-S<sub>N</sub>2'-C19-F<sub>i</sub>

RC

|   |             |             |             |
|---|-------------|-------------|-------------|
| C | -3.06929500 | -0.36335700 | -0.47553100 |
| C | -3.26838800 | 1.05676100  | -0.84778500 |
| C | -2.70040900 | 1.49943200  | -2.23667800 |
| C | -1.74576200 | 2.76873500  | -1.85033200 |
| C | -0.33560600 | 2.87397500  | -2.47321200 |
| C | 0.84604700  | 3.60625200  | -1.66583800 |
| C | 2.16424000  | 2.66593700  | -1.97411300 |
| C | 3.19772900  | 2.30963400  | -0.86776200 |

|   |             |             |             |
|---|-------------|-------------|-------------|
| C | 4.01896200  | 0.87769500  | -0.89249000 |
| C | 3.99723900  | 0.41314600  | 0.63121100  |
| C | 3.92923300  | -1.10221700 | 1.02334900  |
| C | 2.95344900  | -1.43134600 | 2.30250000  |
| C | 1.78719700  | -2.04398100 | 1.63270600  |
| C | 0.52422800  | -2.16006800 | 2.15696600  |
| C | -0.49628700 | -2.65241200 | 1.37935400  |
| C | -1.81537000 | -2.57454700 | 2.04073200  |
| C | -2.95273500 | -2.30835200 | 0.97937100  |
| C | -3.49471900 | -0.81661300 | 0.88667300  |
| C | -2.55985500 | -1.32502600 | -1.22878900 |
| C | -2.57426400 | -2.66113700 | -0.56899800 |
| C | -1.27545500 | -3.44738700 | -0.88284000 |
| C | -0.24814500 | -3.04841800 | 0.09364300  |
| C | 1.01555000  | -2.94364600 | -0.43159400 |
| C | 2.02364300  | -2.40185200 | 0.32900500  |
| C | 3.40433000  | -2.10150600 | -0.10342600 |
| C | 3.43162300  | -1.72448200 | -1.61670100 |
| C | 3.49586100  | -0.16519000 | -1.93606200 |
| C | 2.10910900  | 0.14967400  | -2.32897500 |
| C | 1.52805700  | 1.39302900  | -2.36923100 |
| C | 0.18863800  | 1.50850400  | -2.64103400 |
| C | -0.56183500 | 0.39188300  | -2.90008100 |
| C | -2.03275700 | 0.33040500  | -3.05447600 |
| C | -2.28256000 | -1.18677300 | -2.68375000 |
| C | -0.95467700 | -1.93541000 | -3.07316200 |
| C | -0.52095800 | -3.21664700 | -2.28246100 |
| C | 1.08425300  | -3.25045400 | -1.87522800 |
| C | 2.11151700  | -2.23783600 | -2.47086800 |
| C | 1.37403400  | -0.96734600 | -2.63978300 |
| C | 0.03298400  | -0.84811800 | -2.90528100 |
| C | -2.51994500 | 1.83465800  | 0.17484400  |
| C | -1.66787200 | 2.70093600  | -0.35481000 |
| C | -0.89618100 | 3.70679000  | 0.41576900  |
| C | 0.56687100  | 3.86564100  | -0.14196600 |
| C | 1.30383100  | 2.90774800  | 0.72036600  |
| C | 2.44202600  | 2.20013600  | 0.40080100  |
| C | 2.86193400  | 1.16972800  | 1.20796300  |
| C | 2.19365200  | 0.88941700  | 2.37887500  |
| C | 2.39669200  | -0.31218300 | 3.22383000  |
| C | 0.91787900  | -0.46703500 | 3.94619800  |
| C | 0.04782400  | -1.68656200 | 3.47377600  |
| C | -1.49863900 | -1.52631200 | 3.17326700  |
| C | -1.80720500 | -0.15496400 | 2.69877600  |



|   |             |             |             |
|---|-------------|-------------|-------------|
| C | -3.09885400 | 0.17007700  | 2.02359400  |
| C | -2.88844500 | 1.67164100  | 1.60937500  |
| C | -1.76908700 | 2.21565500  | 2.54761900  |
| C | -0.73800800 | 3.24885000  | 1.91690200  |
| C | 0.61226500  | 2.61380100  | 1.87450900  |
| C | 1.07283800  | 1.61437500  | 2.70755100  |
| C | 0.21909300  | 0.93636100  | 3.71355400  |
| C | -1.11040400 | 0.92662000  | 3.02734300  |
| F | -4.58947700 | 1.38756300  | -0.74019800 |
| F | -3.72181300 | 1.97408700  | -2.97002300 |
| F | -2.42449800 | 3.90309400  | -2.17227700 |
| F | -0.44691000 | 3.48474500  | -3.68451400 |
| F | 1.05369900  | 4.80093900  | -2.24458800 |
| F | 2.81150100  | 3.23285800  | -3.02449500 |
| F | 4.13183400  | 3.29165100  | -0.79310100 |
| F | 5.29775000  | 1.14808700  | -1.21037500 |
| F | 5.13569300  | 0.91039300  | 1.19921200  |
| F | 5.17775800  | -1.48372400 | 1.34830600  |
| F | 3.60451100  | -2.34649800 | 3.06635600  |
| F | -2.08758300 | -3.76582100 | 2.64334400  |
| F | -3.99158400 | -3.09334100 | 1.32237500  |
| F | -4.86040600 | -0.87348600 | 0.88177100  |
| F | -3.61973900 | -3.36978600 | -1.08938900 |
| F | -1.53972400 | -4.77806600 | -0.76894600 |
| F | 4.13431300  | -3.24914000 | 0.02757600  |
| F | 4.52307700  | -2.29482200 | -2.15564200 |
| F | 4.27850500  | -0.03418500 | -3.04830900 |
| F | -2.36481900 | 0.49602100  | -4.36396000 |
| F | -3.29966700 | -1.72146800 | -3.39772300 |
| F | -1.03844300 | -2.26895700 | -4.39149100 |
| F | -0.76790900 | -4.28277900 | -3.06129100 |
| F | 1.51439700  | -4.51819800 | -2.09680100 |
| F | 2.57489400  | -2.70605300 | -3.65660700 |
| F | -1.54524600 | 4.89436600  | 0.33757900  |
| F | 0.97304800  | 5.13333400  | 0.14878100  |
| F | 3.29224300  | -0.06793600 | 4.21312800  |
| F | 1.12967400  | -0.60214500 | 5.26723100  |
| F | 0.18322000  | -2.67821800 | 4.39674000  |
| F | -2.23432700 | -1.79237500 | 4.28001800  |
| F | -4.08111300 | 0.12655200  | 2.96890000  |
| F | -4.04071400 | 2.36044500  | 1.81240600  |
| F | -2.36698700 | 2.81184500  | 3.60946200  |
| F | -0.72538700 | 4.36388500  | 2.69173400  |
| F | 0.12937400  | 1.61879000  | 4.88816600  |

|    |                                 |             |                          |
|----|---------------------------------|-------------|--------------------------|
| H  | -5.56877600                     | -1.77169000 | -2.10088700              |
| O  | -5.49848100                     | -0.81114200 | -2.02893500              |
| H  | -6.05034700                     | -0.58200400 | -1.27080100              |
| TS | imaginary vibrational frequency |             | -761.68 cm <sup>-1</sup> |
| C  | -2.76980700                     | -0.25330600 | -0.48655800              |
| C  | -3.08715200                     | 1.11504200  | -0.96487800              |
| C  | -2.55870200                     | 1.50495400  | -2.36978800              |
| C  | -1.57261600                     | 2.76750800  | -2.06387400              |
| C  | -0.14743500                     | 2.73784500  | -2.64911900              |
| C  | 1.05375100                      | 3.46011900  | -1.87191400              |
| C  | 2.32088700                      | 2.42851200  | -2.09031100              |
| C  | 3.31299100                      | 2.09199900  | -0.94282700              |
| C  | 4.05478200                      | 0.61940000  | -0.85908800              |
| C  | 3.97897900                      | 0.25887500  | 0.68949800               |
| C  | 3.83027100                      | -1.22193800 | 1.17665300               |
| C  | 2.81774800                      | -1.41726100 | 2.45617500               |
| C  | 1.63611200                      | -2.01384800 | 1.80154400               |
| C  | 0.35758300                      | -2.01441000 | 2.29898600               |
| C  | -0.67203800                     | -2.47686200 | 1.51986500               |
| C  | -1.99027100                     | -2.31945900 | 2.14928000               |
| C  | -3.08478100                     | -2.05594500 | 1.05699500               |
| C  | -3.28927700                     | -0.55670000 | 0.78308800               |
| C  | -3.03485900                     | -1.38241900 | -1.35511300              |
| C  | -2.81704000                     | -2.64515900 | -0.46412600              |
| C  | -1.45315100                     | -3.38806900 | -0.70146800              |
| C  | -0.43334500                     | -2.94254800 | 0.25993000               |
| C  | 0.84593900                      | -2.97843000 | -0.22904000              |
| C  | 1.87492300                      | -2.46934700 | 0.52850700               |
| C  | 3.27624400                      | -2.26883700 | 0.10491000               |
| C  | 3.34242200                      | -1.99019900 | -1.43092100              |
| C  | 3.49398300                      | -0.46046100 | -1.84686200              |
| C  | 2.13122200                      | -0.10058200 | -2.28354600              |
| C  | 1.61941000                      | 1.16677200  | -2.40472100              |
| C  | 0.29157600                      | 1.33428300  | -2.69387600              |
| C  | -0.51729200                     | 0.24301900  | -2.87929600              |
| C  | -1.97098900                     | 0.26871700  | -3.11231700              |
| C  | -2.39507200                     | -1.25166700 | -2.74945400              |
| C  | -1.03336500                     | -2.06515200 | -2.95282400              |
| C  | -0.67781300                     | -3.30635600 | -2.08615800              |
| C  | 0.92125500                      | -3.39993300 | -1.64370200              |
| C  | 2.00949800                      | -2.48613300 | -2.27792800              |
| C  | 1.33614000                      | -1.19409100 | -2.52252200              |
| C  | -0.00027000                     | -1.02051200 | -2.79048600              |
| C  | -2.44162200                     | 2.02351000  | 0.00028900               |

|   |             |             |             |
|---|-------------|-------------|-------------|
| C | -1.54624400 | 2.82285300  | -0.56474300 |
| C | -0.72347800 | 3.81383500  | 0.16553600  |
| C | 0.76023100  | 3.83599800  | -0.37333900 |
| C | 1.42033100  | 2.89016500  | 0.56022500  |
| C | 2.52469200  | 2.10398700  | 0.31126800  |
| C | 2.86983400  | 1.10369100  | 1.18789200  |
| C | 2.16626400  | 0.93738600  | 2.35982100  |
| C | 2.29654100  | -0.21034400 | 3.28852500  |
| C | 0.79929400  | -0.24019800 | 3.99020900  |
| C | -0.12247600 | -1.44059000 | 3.57497300  |
| C | -1.65669800 | -1.22291800 | 3.23631600  |
| C | -1.89554900 | 0.14032800  | 2.69276800  |
| C | -3.12515600 | 0.46478000  | 1.90071700  |
| C | -2.84262900 | 1.94049600  | 1.43281200  |
| C | -1.72028100 | 2.48894500  | 2.36671200  |
| C | -0.61855600 | 3.41973900  | 1.69249200  |
| C | 0.69042300  | 2.70383000  | 1.71191600  |
| C | 1.08046700  | 1.73945800  | 2.61846100  |
| C | 0.17884600  | 1.18217600  | 3.65647700  |
| C | -1.14546100 | 1.20375500  | 2.95867900  |
| F | -4.46031900 | 1.34320800  | -0.97038100 |
| F | -3.58538200 | 1.96743400  | -3.11690100 |
| F | -2.18206400 | 3.89450900  | -2.52466700 |
| F | -0.18900300 | 3.24817900  | -3.91170400 |
| F | 1.33839800  | 4.59917200  | -2.52610100 |
| F | 3.01299700  | 2.88171400  | -3.16791800 |
| F | 4.29679500  | 3.02685900  | -0.90743500 |
| F | 5.35229700  | 0.79859200  | -1.16808900 |
| F | 5.12910000  | 0.73808900  | 1.25091200  |
| F | 5.05261500  | -1.64042200 | 1.55086600  |
| F | 3.41033900  | -2.30716200 | 3.29388400  |
| F | -2.31802900 | -3.47019900 | 2.80137700  |
| F | -4.20557600 | -2.64610500 | 1.51681300  |
| F | -4.99396200 | -0.57387600 | 0.57436200  |
| F | -3.78256300 | -3.55548100 | -0.71064000 |
| F | -1.69002500 | -4.71327400 | -0.46820900 |
| F | 3.95176000  | -3.43610700 | 0.32175100  |
| F | 4.40819800  | -2.65009000 | -1.91636500 |
| F | 4.30170300  | -0.44075400 | -2.94822600 |
| F | -2.21008700 | 0.42300400  | -4.44613100 |
| F | -3.28270400 | -1.68164500 | -3.68125200 |
| F | -1.02696900 | -2.46769700 | -4.25714800 |
| F | -0.97767600 | -4.40663800 | -2.79588700 |
| F | 1.27868200  | -4.70219600 | -1.76617400 |

|    |             |             |             |
|----|-------------|-------------|-------------|
| F  | 2.46585500  | -3.03925800 | -3.42956600 |
| F  | -1.27316400 | 5.04650800  | 0.03062500  |
| F  | 1.25317800  | 5.08838700  | -0.15836300 |
| F  | 3.18569200  | 0.06183500  | 4.27715700  |
| F  | 0.98172400  | -0.30509300 | 5.32088400  |
| F  | -0.05379900 | -2.37863900 | 4.55986200  |
| F  | -2.41863400 | -1.40886500 | 4.34130600  |
| F  | -4.19956600 | 0.44587500  | 2.73209700  |
| F  | -3.97503300 | 2.67640000  | 1.57653500  |
| F  | -2.30869100 | 3.19522000  | 3.36556400  |
| F  | -0.54381000 | 4.57048800  | 2.41135100  |
| F  | 0.12364000  | 1.94651600  | 4.78282300  |
| H  | -4.97998200 | -1.01786700 | -0.64239400 |
| O  | -4.58256100 | -1.42370600 | -1.59586000 |
| H  | -4.84803300 | -0.85871300 | -2.34814500 |
| IP |             |             |             |
| C  | -3.08573600 | -0.46837800 | -0.31936300 |
| C  | -3.39142300 | 0.91053100  | -0.78798800 |
| C  | -2.91762600 | 1.25553600  | -2.23094300 |
| C  | -1.97310700 | 2.57641000  | -2.00686200 |
| C  | -0.58950000 | 2.63075400  | -2.68398200 |
| C  | 0.61037500  | 3.45435600  | -2.00563600 |
| C  | 1.93073800  | 2.50749900  | -2.28347200 |
| C  | 3.02117000  | 2.27091600  | -1.19807400 |
| C  | 3.86749000  | 0.85405300  | -1.12815000 |
| C  | 3.92133800  | 0.53316900  | 0.43121600  |
| C  | 3.90137000  | -0.94018900 | 0.96130000  |
| C  | 2.99110200  | -1.16634300 | 2.30985100  |
| C  | 1.80919500  | -1.85737900 | 1.75428500  |
| C  | 0.57318700  | -1.94631700 | 2.34586800  |
| C  | -0.46941800 | -2.51899600 | 1.65837800  |
| C  | -1.76297400 | -2.41450100 | 2.35576800  |
| C  | -2.87928600 | -2.19085900 | 1.28839600  |
| C  | -3.00219500 | -0.73177400 | 0.97783500  |
| C  | -3.20428500 | -1.69079100 | -1.16402800 |
| C  | -2.72077700 | -2.85750800 | -0.19995500 |
| C  | -1.33163800 | -3.52342600 | -0.50318200 |
| C  | -0.28499800 | -2.99108100 | 0.38809000  |
| C  | 0.95800300  | -2.93998800 | -0.18974500 |
| C  | 1.99299400  | -2.32830100 | 0.47777800  |
| C  | 3.34769700  | -2.04962000 | -0.04347400 |
| C  | 3.29993600  | -1.81390600 | -1.58611000 |
| C  | 3.31760400  | -0.28827000 | -2.04712700 |
| C  | 1.90542900  | -0.03186300 | -2.38868300 |

|   |             |             |             |
|---|-------------|-------------|-------------|
| C | 1.29709600  | 1.19319100  | -2.51205800 |
| C | -0.05635700 | 1.26074100  | -2.70912900 |
| C | -0.80273500 | 0.11332900  | -2.78816000 |
| C | -2.26635400 | 0.02673400  | -2.96103600 |
| C | -2.53891000 | -1.52013900 | -2.56597800 |
| C | -1.13423200 | -2.22800000 | -2.80295100 |
| C | -0.64967800 | -3.42124400 | -1.93393000 |
| C | 0.97398600  | -3.39302500 | -1.59695600 |
| C | 1.94868200  | -2.41998900 | -2.32259000 |
| C | 1.17374000  | -1.18082400 | -2.53626100 |
| C | -0.18708600 | -1.10449000 | -2.69928400 |
| C | -2.65515100 | 1.82851000  | 0.12440200  |
| C | -1.83623200 | 2.64797500  | -0.51664100 |
| C | -1.04096400 | 3.71964000  | 0.13148600  |
| C | 0.39457500  | 3.84536200  | -0.50017400 |
| C | 1.18680600  | 2.98260500  | 0.41229200  |
| C | 2.32512100  | 2.26822500  | 0.10877500  |
| C | 2.79748200  | 1.32220000  | 0.98728500  |
| C | 2.18656600  | 1.14122200  | 2.20877900  |
| C | 2.45143000  | 0.02535700  | 3.14953000  |
| C | 1.01097600  | -0.08548000 | 3.95243900  |
| C | 0.14498800  | -1.36239800 | 3.63724800  |
| C | -1.42314100 | -1.26149700 | 3.40732600  |
| C | -1.78442500 | 0.08358000  | 2.87942700  |
| C | -3.02081800 | 0.28257800  | 2.07459400  |
| C | -2.91949900 | 1.76465300  | 1.58954500  |
| C | -1.78543600 | 2.42250600  | 2.43478300  |
| C | -0.80510200 | 3.40086200  | 1.66091100  |
| C | 0.55364000  | 2.78699700  | 1.61961200  |
| C | 1.06842200  | 1.87795600  | 2.52313100  |
| C | 0.28146600  | 1.28867900  | 3.63591400  |
| C | -1.08726300 | 1.20255600  | 3.04267000  |
| F | -4.73722000 | 1.12098500  | -0.67804200 |
| F | -3.98467400 | 1.64325000  | -2.95313600 |
| F | -2.67810300 | 3.66649400  | -2.41346400 |
| F | -0.74702000 | 3.09699000  | -3.95344700 |
| F | 0.76872200  | 4.59256900  | -2.70219400 |
| F | 2.51867400  | 2.97487500  | -3.41428300 |
| F | 3.93953100  | 3.26871900  | -1.25805100 |
| F | 5.12448100  | 1.11173400  | -1.53170800 |
| F | 5.07378900  | 1.09953200  | 0.89870900  |
| F | 5.17173000  | -1.26832000 | 1.25967400  |
| F | 3.69610300  | -1.99438800 | 3.12361800  |
| F | -2.03645000 | -3.55315100 | 3.04670400  |

|   |             |             |             |
|---|-------------|-------------|-------------|
| F | -4.04708800 | -2.64787000 | 1.81058700  |
| F | -3.63505900 | -3.84875100 | -0.30294000 |
| F | -1.46230800 | -4.85746300 | -0.23391700 |
| F | 4.10679700  | -3.16705000 | 0.15987200  |
| F | 4.37481300  | -2.41507900 | -2.12429500 |
| F | 4.04273200  | -0.24427300 | -3.20328300 |
| F | -2.55591000 | 0.15186100  | -4.28729200 |
| F | -3.39515500 | -2.05078400 | -3.47635200 |
| F | -1.11451500 | -2.65638700 | -4.10188700 |
| F | -0.91969600 | -4.55549200 | -2.60292300 |
| F | 1.42050800  | -4.66818400 | -1.71231900 |
| F | 2.35567700  | -2.96329000 | -3.49712000 |
| F | -1.70537000 | 4.89207100  | -0.01959800 |
| F | 0.79295500  | 5.13927700  | -0.34521500 |
| F | 3.38511100  | 0.37383600  | 4.07153800  |
| F | 1.28724700  | -0.10129600 | 5.26808000  |
| F | 0.35226500  | -2.25981500 | 4.64043000  |
| F | -2.09420900 | -1.48034600 | 4.56294000  |
| F | -4.13553300 | 0.10777800  | 2.84301300  |
| F | -4.09933300 | 2.39654900  | 1.81562100  |
| F | -2.36332000 | 3.12639000  | 3.44166300  |
| F | -0.77902500 | 4.58636000  | 2.32343500  |
| F | 0.26088200  | 2.07522900  | 4.74790700  |
| O | -4.58451600 | -1.78399400 | -1.34071100 |
| H | -4.77968500 | -2.47373100 | -1.99718700 |
